# Supplementary material for: Data-driven, participatory characterization of farmer varieties discloses teff breeding potential under current and future climates
Source: eLife. 2022 Sep 2;11:e80009. doi: 10.7554/eLife.80009 (PMC9439699; doi:10.7554/eLife.80009)
Supplement: Supplementary file 1. — (A) Complete Information for the teff samples used in this study. For each accession, the table reports the name of the accession at the germplasm repository (Name), the ID used in this study, the species, the type of materials (Status), the pedigree if known, the source of the accession, research center (Center) and release year if available (EBI, Ethiopian Biodiversity Institute; DZARC, Debre Zeit Agricultural Research Center; AARC, Adet Agricultural Research Center; HARC, Holleta Agricultural Research Center; BARC, Bako Agricultural Research Center; MARC, Melkassa Agricultural Research Center; SARC, Sirinka Agricultural Research Center). For accessions deriving from landraces, the table also reports the corresponding agroecological zone and the region name at three levels (Region_1, Region_2, and Region_3), the longitude, and the latitude. The table then reports the genetic cluster assigned by the analyses, the altitude, and the historical bioclim variables. Finally, BLUP values for phenotypes are farmer traits are reported. When specific by location, the trait code is attached to either Akaki or Adet. When specific by gender, M (men) or W (women) is attached. DH, days to heading; DM, days to maturity; PH, plant height; PL, panicle length; PBPM, number of primary branches per main shoot panicle; TT, total tillers; CLF, first culm length; CDF, first culm diameter; PW, panicle weight; PY, panicle yield; GY, grain yield; BY, biomass yield; HI, harvest index; GFP, grain filling period; GFR, grain filling rate; BPR, biomass production rate; OA, overall appreciation; PA, panicle appreciation. (B) Haplotype blocks for SNPs used in this study. For each SNP, the table reports the SNP name, the chromosome, and the position. If any, the table reports the corresponding haplotype block with start and stop position and number of SNPs in the block. (C) Variance components from BLUP model calculation on agronomic traits and farmer traits. The table reports solution, standard err [file elife-80009-supp1.xlsx]

## Sheet: Supplemental File 1 captions
Supplementary File 1A	Complete Information for the teff samples used in this study. For each accession, the table reports the name of the accession at the germplasm repository (Name), the ID used in this study, the species, the type of materials (Status), the pedigree if known, the source of the accession, research center (Center) and release year if available (EBI, Ethiopian Biodiversity Institute; DZARC, Debre Zeit …
Supplementary File 1B	Haplotype blocks for SNPs used in this study. For each SNP, the table report the SNP name, the chromosome, and the position. If any, the table reports the corresponding haplotype block with start and stop position and number of SNPs in the block.
Supplementary File 1C	Variance components from BLUP model calculation on agronomic traits and farmer traits. The table reports solution, standard error, z ratio, and percent variance explained for each component of the model for each trait. Trait codes ans in Supplemenary File 1A. Factor codes as follows: ID, genotype; REP, replication within the field; LOCATION, field location; F_TYPE, gender; interactions between fa…
Supplementary File 1D	Main effects of and interactions between location, genetic cluster, and, in the case of PVS traits, gender, regarding teff traits. Phentoype codes as in Supplementary File 1A. Values in the table are p-values for a two-way ANOVA (metric traits) and three-way ANOVA (PVS traits). Significant effects are highlighted in bold
Supplementary File 1E	Genome wide association results. For each SNP-trait combination, the table reports the trait name, the SNP name, its chromosome, and position. The reference (REF) and alternative (ALT) allele are reported for each SNP. For each association, he table reports the effect, the standard error (SE), the corresponding p-value (pvalue) and multiple-test correction with a q-value qvalue. The number of PC …
Supplementary File 1F	Candidate genes mining for significant associations. The table reports genes in LD blocks with at least one significant association. Each row reports the Eragrostis teff gene ID (Et_gene), with chromosome, start position, end position, and DNA strand (positive + or negative -). When present, the table reports the closest homolog gene in Arabidopsis (id_At) with the percentual identity in the alig…
Supplementary File 1G	SNPs with adaptation potential. For each marker, the table reports the chromosome, position, Fst values, and gradient forest model fit (GF R2).

## Sheet: Supplemental File 1A
Name	ID	Species	Status	Pedigree	Source	Center	Release Year	Agroecology	Region_1	Region_2	Region_3	Longitude	Latitude	Genetic_cluster	Altitude	bio1	bio2	bio3	bio4	bio5	bio6	bio7	bio8	bio9	bio10	bio11	bio12	bio13	bio14	bio15	bio16	bio17	bio18	bio19	DH	DH_Adet	DH_Akaki	DM	DM_Adet	DM_Akaki	PH	PH_Adet	PH_Akaki	PL_x	PL_Adet	PL_Akaki	PBPM	PBPM_Adet	PBPM_Akaki
9173	T_205	Eragrostis tef	landrace	NA	EBI	NA	NA	SH3	Oromia	Misraq Harerge	Girawa	41.7875	9.18533	6	2402	14.2	12.5	0.83	6.37	21.7	6.8	14.9	13.6	13.6	15	13.6	1007	215	8	71	469	58	318	469	44.8307	45.1916	44.6483	103.505	101.972	104.096	74.07	85.9519	62.0043	25.9962	24.69	23.8453	22.727	20.1228	25.1531
9174	T_206	Eragrostis tef	landrace	NA	EBI	NA	NA	SM2	Oromia	Misraq Harerge	Girawa	41.7722	8.98817	4	1931	17.8	12.5	0.82	6.93	25.6	10.5	15.1	17.1	17.2	18.7	17.1	853	145	8	61	359	48	285	359	63.7155	63.3405	63.4647	106.633	106.901	104.982	80.3529	109.458	57.4618	34.8548	48.5532	26.4434	21.8224	21.3648	21.2833
9179	T_207	Eragrostis tef	landrace	NA	EBI	NA	NA	SH3	Oromia	Misraq Harerge	Meta	41.559	9.2715	6	2524	13.7	12.7	0.81	6.78	21.6	6.1	15.5	13.5	12.9	14.6	12.9	1133	259	9	75	577	62	325	62	44.8307	44.714	45.1308	97.7307	97.4921	97.8919	63.4964	70.2812	46.1056	27.9322	26.9879	27.0929	20.7068	14.5752	25.1531
9394	T_362	Eragrostis tef	landrace	NA	EBI	NA	NA	SM3	Tigray	Mehakelegnaw	Axum	38.793	14.138	1	2132	18.3	15.9	0.7	15.25	29.3	6.6	22.7	17.6	16.7	20.5	16.7	640	212	1	131	475	6	67	16	63.7155	63.3405	63.4647	104.708	105.109	103.21	79.4028	105.771	58.2795	33.8869	46.3436	25.7939	25.1392	29.2308	22.5732
9410	T_363	Eragrostis tef	landrace	NA	EBI	NA	NA	SM3	Tigray	Mehakelegnaw	Laelay Maychew	38.6532	14.0562	3	2074	19.1	16	0.7	15.44	30.3	7.6	22.7	18.6	17.8	21.3	17.6	690	231	1	135	522	5	64	16	55.3768	55.2213	55.2627	98.9337	98.8362	98.7782	79.4487	105.125	59.0517	31.4522	40.6872	24.2512	22.8778	23.4348	22.1433
9444	T_431	Eragrostis tef	landrace	NA	EBI	NA	NA	SM2	Tigray	Semien Mi'irabaw	Shiraro	37.992	14.45	4	1476	25.4	16.7	0.67	23.94	38.2	13.5	24.7	25	24.1	28.9	23.4	776	245	0	133	587	2	162	583	40.6614	40.8932	40.7886	87.385	88.0835	88.1431	62.1173	65.2112	47.0141	23.0336	20.1825	19.7857	19.4103	15.9828	19.9934
9447	T_432	Eragrostis tef	landrace	NA	EBI	NA	NA	SM3	Tigray	Semien Mi'irabaw	Kafta Humera	38.3583	14.1555	1	2188	17.8	15.6	0.71	15.31	28.8	7.1	21.7	17.2	16.7	20	16.4	796	272	0	136	611	1	166	12	45.5665	45.6692	45.6133	94.3623	95.7	93.4606	63.6344	70.3733	46.4236	22.4763	21.5966	16.944	22.7572	26.0016	19.1335
9469	T_58	Eragrostis tef	landrace	NA	EBI	NA	NA	M3	Amhara	Semen Gondar	Chilga	37.0533	12.353	5	1916	19.8	13.6	0.74	12.46	29.6	11.4	18.2	18.4	19.8	21.5	18.3	1171	325	2	117	832	11	112	777	46.057	46.1468	46.0958	94.1217	94.3559	94.3469	80.5061	101.623	65.6383	30.4255	34.5004	27.0929	22.9984	22.11	23.8632
9477	T_63	Eragrostis tef	landrace	NA	EBI	NA	NA	M3	Amhara	Semen Gondar	Maksegnit	37.5042	12.436	3	1926	20.1	14.3	0.76	13.94	30.1	11.3	18.8	18.7	20	22.1	18.5	1074	315	2	119	770	12	114	727	44.095	44.2364	44.1659	87.8662	88.5316	88.5862	71.4343	89.5469	50.6481	27.7562	31.7606	22.2215	22.6064	25.1736	19.5634
9482	T_118	Eragrostis tef	landrace	NA	EBI	NA	NA	M3	Amhara	Semen Gondar	Addis Zemen	37.685	12.1737	3	1973	19.6	15.2	0.77	11.88	29.8	10.2	19.6	18.5	20.2	21.3	18.2	1076	341	3	128	795	10	75	782	44.095	44.2364	44.1659	91.7157	92.1158	92.1312	70.2084	84.0161	52.4651	28.0496	31.7606	23.0334	23.7823	25.9188	22.1433
9498	T_3	Eragrostis tef	landrace	NA	EBI	NA	NA	SH3	Amhara	Mirab Gojjam	Dangela	36.8917	11.3528	5	2008	17.5	14.9	0.73	8.25	27.3	7.1	20.2	17	16.8	18.6	16.6	1501	374	4	105	968	23	140	60	NA	NA	NA	NA	NA	NA	NA	NA	NA	NA	NA	NA	NA	NA	NA
9499	T_4b	Eragrostis tef	landrace	NA	EBI	NA	NA	SH3	Amhara	Agew Awi	Dangela	11.2878	36.8253	5	2087	17	14.9	0.73	7.66	26.8	6.6	20.2	16.5	16.4	18	16.2	1532	363	5	101	960	30	154	70	NA	NA	NA	NA	NA	NA	NA	NA	NA	NA	NA	NA	NA	NA	NA
9501	T_5	Eragrostis tef	landrace	NA	EBI	NA	NA	SH3	Amhara	Agew Awi	Dangela	36.8253	11.2878	6	2087	17	14.9	0.73	7.66	26.8	6.6	20.2	16.5	16.4	18	16.2	1532	363	5	101	960	30	154	70	44.095	44.2364	44.1659	92.6781	93.0118	93.0175	72.0779	85.9519	56.0991	25.8496	25.5738	22.6274	23.9633	21.0336	27.7329
9515	T_156	Eragrostis tef	landrace	NA	EBI	NA	NA	M3	Amhara	Mirab Gojjam	Jabi Tehnan	37.325	10.6722	6	1815	19.1	14.5	0.72	11.12	29.2	9.3	19.9	18	18.5	20.8	18	1408	347	5	102	896	24	176	896	56.3578	56.1765	56.2276	100.858	100.628	100.551	80.077	99.8712	66.0925	29.3695	37.5054	21.4095	20.4656	19.7088	19.1335
9526	T_36	Eragrostis tef	landrace	NA	EBI	NA	NA	M3	Amhara	Misraq Gojjam	Guzamn	37.715	10.3082	4	2398	16.2	13	0.73	12.54	25.6	8	17.6	14.8	16.3	18	14.8	1305	310	10	95	803	42	205	803	56.8483	56.6541	56.7101	100.377	100.18	100.108	81.1191	107.153	62.0043	31.6575	41.3058	24.2512	23.5713	22.8552	24.7231
9551	T_40	Eragrostis tef	landrace	NA	EBI	NA	NA	M3	Amhara	Misraq Gojjam	Dejen	38.1248	10.2253	3	2442	16.4	12.9	0.72	13.89	25.8	8.1	17.7	14.8	15.8	18.3	14.8	1168	313	5	102	739	25	198	739	60.2819	59.9973	60.0874	101.34	101.972	100.108	83.4177	111.762	64.2755	33.9162	44.576	27.4989	26.3453	29.2308	26.013
9556	T_29	Eragrostis tef	landrace	NA	EBI	NA	NA	M2	Amhara	Misraq Gojjam	Dejen	38.175	10.093	5	1468	21.7	14.8	0.74	16.5	32.2	12.3	19.9	20.5	21.6	24	19.7	924	259	1	108	610	15	147	599	44.095	44.2364	44.1659	94.1217	94.3559	94.3469	70.5455	79.4992	57.9161	25.2189	23.2317	23.0334	22.5461	23.352	21.2833
9559	T_274	Eragrostis tef	landrace	NA	EBI	NA	NA	M3	Oromia	North Shewa	Gohatsion	38.2667	9.98933	4	2530	16.1	12.8	0.69	14.51	25.6	7.3	18.3	14.5	15.2	18	14.5	1100	297	4	104	698	24	193	698	45.8117	46.1468	45.6133	97.4901	97.4921	97.4488	79.6786	97.2901	67.4553	33.1829	41.0407	28.7167	23.2094	23.9316	22.5732
15299	T_398	Eragrostis tef	landrace	NA	EBI	NA	NA	SM4	Tigray	Misraqawi	Adigrat	39.5088	14.225	1	2523	15.6	15.6	0.7	16.28	26	3.9	22.1	16.7	13.9	17.6	13.4	566	149	7	99	335	27	142	39	45.076	45.1916	45.1308	94.6029	94.8039	94.79	71.8634	88.9939	52.4651	24.3683	21.5524	22.2215	21.2797	20.7852	20.3374
15301	T_399	Eragrostis tef	landrace	NA	EBI	NA	NA	SM4	Tigray	Misraqawi	Ganta Afeshum	39.4748	14.252	1	2443	16.1	15.8	0.7	16.65	26.7	4.2	22.5	17.2	14.4	18.2	13.8	563	150	7	101	334	27	139	42	56.8483	54.7437	58.64	101.34	101.524	100.551	74.9282	97.2901	53.3736	29.7509	34.6772	25.0631	22.8175	22.8552	22.5732
15304	T_412	Eragrostis tef	landrace	NA	EBI	NA	NA	SM3	Tigray	Debubawi	Alamata	39.5583	12.3425	4	1627	22	16.2	0.69	17.39	34.8	11.6	23.2	23	20.6	24.3	19.8	814	184	13	89	387	65	215	95	45.5665	45.6692	45.6133	97.9713	97.9401	97.8919	65.9483	74.8902	48.8311	23.7963	23.3643	18.9738	19.9832	18.384	19.1335
15305	T_413	Eragrostis tef	landrace	NA	EBI	NA	NA	SM2	Tigray	Debubawi	Alamata	39.5922	12.3422	1	1479	22.6	16	0.69	17.36	35.2	12.3	22.9	23.5	21.2	24.9	20.4	773	177	13	88	372	64	207	91	41.1519	41.3708	41.2711	89.3098	89.8756	89.9156	68.063	79.4071	50.6481	24.4709	22.3037	21.8155	19.5912	17.3076	19.1335
15307	T_109	Eragrostis tef	landrace	NA	EBI	NA	NA	SM2	Amhara	Semen Wello	Kobo	39.6387	12.1518	1	1495	22.1	15.8	0.7	16.8	34.5	12	22.5	23.1	20.8	24.3	19.9	808	185	15	84	393	70	222	96	41.3971	41.8484	41.2711	89.791	90.3237	90.3587	61.4277	69.5898	40.6546	23.5029	23.3643	18.1619	19.0183	17.8044	16.9836
15318	T_98	Eragrostis tef	landrace	NA	EBI	NA	NA	SM3	Amhara	North Shewa	Minjarna Shenkora	39.3378	8.925	3	2075	18.6	14.2	0.73	12.67	28.3	8.9	19.4	18.5	17	20.3	17	899	238	6	93	541	33	217	33	50.9621	51.8781	49.9555	99.4149	99.2842	99.2213	75.7557	93.7872	59.2788	29.6335	34.7656	24.6572	22.0938	21.282	22.1433
15360	T_212	Eragrostis tef	landrace	NA	EBI	NA	NA	SM3	Oromia	Misraq Shewa	Gimbichu	39.1423	8.9525	3	2289	17.5	14	0.74	11.03	26.8	8	18.8	17.2	16.1	18.9	16.1	958	247	7	92	575	32	193	32	43.1139	43.2812	43.2009	96.0465	96.148	96.1194	67.0823	77.3791	49.7396	27.1696	27.7834	24.2512	22.7572	21.0336	24.2931
15362	T_213	Eragrostis tef	landrace	NA	EBI	NA	NA	SM3	Oromia	Misraq Shewa	Gimbichu	39.205	8.98717	3	2356	17.1	13.8	0.73	11.16	26.4	7.7	18.7	16.9	15.6	18.5	15.6	950	251	7	91	567	33	230	33	41.6424	41.8484	41.7535	92.1969	92.5638	92.5744	64.7837	69.5437	50.6481	27.1109	27.1647	24.6572	19.5309	17.142	19.1335
15430	T_177	Eragrostis tef	landrace	NA	EBI	NA	NA	SM3	Oromia	Arsi	Hitosa	39.192	8.13783	5	2176	17.3	13.9	0.73	10.96	26.4	7.5	18.9	17.1	15.8	18.7	15.8	972	189	7	71	504	42	267	42	44.8307	45.1916	44.6483	94.6029	94.8039	94.79	72.8288	82.2186	62.0043	29.0176	28.9323	28.3108	23.4808	24.2628	23.0032
17313	T_354	Eragrostis tef	landrace	NA	EBI	NA	NA	SH2	SNNP	Gurage	Abeshege	37.7045	8.274	5	1735	19.5	14.9	0.76	9.84	29.2	9.8	19.4	18.7	19	20.8	18.4	1239	242	12	77	660	52	194	627	61.7534	61.4301	61.5348	100.377	101.076	99.2213	85.563	115.911	66.5468	34.9428	48.5532	26.687	24.2346	27.5748	21.7133
17336	T_214	Eragrostis tef	landrace	NA	EBI	NA	NA	M4	Oromia	Arsi	Arsi Negelle	38.941	7.36733	5	2772	12.7	12.5	0.73	8.54	21	4	17	11.8	12.2	13.9	11.8	1125	180	17	55	489	81	268	489	44.095	44.714	43.6834	93.6405	93.9079	93.9038	68.9518	78.854	53.8278	28.9882	31.0535	26.281	20.556	20.3712	18.7035
17355	T_333	Eragrostis tef	landrace	NA	EBI	NA	NA	SH4	SNNP	Gurage	Sodo	38.4875	8.35967	6	2593	15.1	13.5	0.77	8.55	23.7	6.2	17.5	14.3	14.3	16.4	14.3	1098	212	10	73	570	46	274	570	44.5855	44.714	44.6483	95.0841	95.252	95.2332	69.3502	80.5132	53.3736	29.6042	32.9095	26.281	25.4407	25.0908	27.7329
17357	T_334	Eragrostis tef	landrace	NA	EBI	NA	NA	SH3	SNNP	Gurage	Sodo	38.5242	8.27567	6	1938	18.3	14.2	0.78	8.14	27	8.9	18.1	17.7	17.5	19.5	17.5	1119	213	7	70	550	50	299	50	57.8293	57.6093	57.675	101.821	101.972	100.994	76.4912	102.913	52.4651	33.0069	42.278	27.0929	23.2396	21.9444	24.7231
17359	T_335	Eragrostis tef	landrace	NA	EBI	NA	NA	SH3	SNNP	Gurage	Sodo	38.5918	8.37533	4	2139	17.4	14.2	0.78	8.58	26.2	8.1	18.1	16.7	16.6	18.7	16.6	1064	211	9	76	556	42	268	42	45.5665	45.6692	45.6133	94.6029	94.8039	94.79	67.2968	79.868	47.9226	24.9696	22.9223	22.6274	20.6767	19.4604	19.9934
17368	T_292	Eragrostis tef	landrace	NA	EBI	NA	NA	M3	Oromia	Debub Mirab Shewa	Weliso	37.9888	8.52333	3	2012	17.7	14	0.8	10.89	26.8	9.5	17.3	16.6	17.6	19.1	16.3	1262	270	9	87	737	37	267	688	44.095	44.2364	44.1659	95.0841	95.252	95.2332	68.8905	83.2786	49.2853	27.0522	26.1041	25.4691	20.345	18.5496	19.9934
17371	T_293	Eragrostis tef	landrace	NA	EBI	NA	NA	M3	Oromia	Debub Mirab Shewa	Wenchi	37.8863	8.708	3	2613	15.1	13.9	0.78	8.11	24	6.4	17.6	14.1	14.8	16.2	14.1	1247	260	13	82	691	47	267	691	43.1139	43.7588	42.7185	93.6405	93.9079	93.9038	71.7714	89.6391	51.5566	27.7562	26.4576	27.0929	24.8377	22.6068	28.5929
17373	T_294	Eragrostis tef	landrace	NA	EBI	NA	NA	M3	Oromia	Debub Mirab Shewa	Wenchi	37.9017	8.59317	6	2091	17.5	14.3	0.8	10.62	26.7	8.9	17.8	16.4	17.3	18.8	16.1	1233	269	10	85	701	42	186	672	47.038	47.102	47.0607	96.5277	96.5961	96.5625	68.7679	81.9881	50.1938	28.0202	31.6722	23.0334	24.5361	29.2308	20.8533
17375	T_295	Eragrostis tef	landrace	NA	EBI	NA	NA	M3	Oromia	Debub Mirab Shewa	Wenchi	37.825	8.60083	6	2024	17.8	14.4	0.79	10.82	27.1	9	18.1	16.7	17.6	19.2	16.5	1240	271	10	83	696	45	183	672	45.076	45.1916	45.1308	94.6029	94.8039	94.79	67.6646	80.0523	48.8311	26.2896	23.8062	25.4691	23.2698	22.4412	24.2931
17386	T_178	Eragrostis tef	landrace	NA	EBI	NA	NA	H4	Oromia	Arsi	Honkolo Wabe	39.418	7.388	6	2708	13.4	13.7	0.77	7.72	21.9	4.3	17.6	12.8	12.7	14.4	12.5	999	171	14	57	443	74	276	107	43.1139	43.7588	42.7185	93.6405	93.9079	93.9038	76.6751	96.5527	59.2788	29.5162	31.3186	27.4989	23.7823	22.1928	26.013
17829	T_224	Eragrostis tef	landrace	NA	EBI	NA	NA	SH3	Oromia	Misraq Wellega	Guto Gida	36.5702	9.038	5	2014	17.9	12.9	0.77	13.05	27.2	10.6	16.6	16.3	18.6	19.6	16.1	1980	393	9	85	1093	44	164	1027	62.7345	62.3853	62.4997	103.264	103.764	101.88	81.4255	106.693	63.367	33.0362	40.5988	28.7167	22.2747	20.5368	23.4332
17830	T_225	Eragrostis tef	landrace	NA	EBI	NA	NA	SH3	Oromia	Misraq Wellega	Guto Gida	36.5842	9.10033	6	2093	17.6	13.1	0.79	12.29	26.9	10.4	16.5	16	18.3	19.2	16	1969	390	10	85	1085	45	164	1028	52.4337	52.3557	52.3679	96.0465	96.148	96.1194	73.6409	86.9659	59.7331	30.1322	33.6166	27.0929	21.4003	19.3776	22.1433
17832	T_226	Eragrostis tef	landrace	NA	EBI	NA	NA	SH3	Oromia	Misraq Wellega	Guto Gida	36.6033	9.08383	5	2151	17.4	13.2	0.8	11.43	26.6	10.1	16.5	15.9	18.1	18.9	15.9	1967	386	11	84	1073	47	172	1025	60.7724	60.4749	60.5699	102.783	103.316	101.437	80.8126	104.849	63.367	35.1188	46.8739	28.7167	27.6117	29.3964	29.4528
17844	T_326	Eragrostis tef	landrace	NA	EBI	NA	NA	SH3	Oromia	Misraq Wellega	Haro Limu	36.3062	9.96867	6	1727	19.4	13.9	0.72	12.58	29.8	10.5	19.3	18	19.4	21.2	18	1712	357	6	94	976	20	275	976	43.6044	43.7588	43.6834	96.0465	96.148	96.1194	68.1856	77.0104	53.3736	27.0522	30.0813	21.8155	20.9782	19.8744	20.4234
17874	T_230	Eragrostis tef	landrace	NA	EBI	NA	NA	SH3	Oromia	Misraq Wellega	Gida Ayana	36.6858	9.86767	5	2060	17.5	14	0.74	10.4	27.5	8.7	18.8	16.3	17.5	19	16.3	1729	343	10	89	959	34	309	959	42.6234	42.8036	42.7185	90.2721	90.7717	90.8018	68.9211	74.6137	57.9161	24.4416	23.9829	20.1917	21.1892	21.696	19.1335
17882	T_231	Eragrostis tef	landrace	NA	EBI	NA	NA	SH3	Oromia	Misraq Wellega	Kiremu	36.7895	9.9205	5	2002	17.7	14.2	0.73	10.3	27.8	8.6	19.2	16.7	17.7	19.3	16.7	1650	333	9	91	933	32	284	933	46.5475	47.5796	45.6133	98.9337	98.8362	98.7782	77.6558	93.9716	64.7298	29.7802	32.9979	26.687	24.2045	26.25	23.0032
17906	T_321	Eragrostis tef	landrace	NA	EBI	NA	NA	SH2	Oromia	Kelem Wellega	Gawo Qebe	34.8522	9.04117	5	1550	20.9	12.4	0.73	12.49	30.8	13.9	16.9	19.6	21.7	22.8	19.6	1370	251	6	81	670	28	99	670	62.7345	62.3853	62.4997	101.34	101.972	100.108	81.6401	108.721	62.0043	33.1535	43.1619	26.687	23.4808	21.3648	26.013
17913	T_322	Eragrostis tef	landrace	NA	EBI	NA	NA	SH3	Oromia	Mirab Welega	Begi	34.5422	9.24067	5	1898	19.7	11.8	0.72	12.81	29.1	12.8	16.3	18.7	20.5	21.6	18.3	1471	296	4	79	721	34	128	691	49.7359	49.9676	49.473	96.5277	96.5961	96.5625	74.0394	95.0778	52.9193	31.9215	39.4498	26.687	21.8827	21.1164	21.7133
17914	T_232	Eragrostis tef	landrace	NA	EBI	NA	NA	SH3	Oromia	Misraq Wellega	Guba Seyo	36.984	9.18767	5	1951	18.1	14.3	0.76	10.42	28.1	9.3	18.8	17	18.4	19.5	16.9	1499	326	12	86	840	45	293	810	49.0001	49.0124	48.9906	98.9337	98.8362	98.7782	80.5061	99.779	67.4553	30.5722	31.8489	29.9346	23.722	19.9572	28.1629
17916	T_233	Eragrostis tef	landrace	NA	EBI	NA	NA	SH3	Oromia	Misraq Wellega	Guba Seyo	36.9697	9.18933	5	1955	18.1	14.3	0.76	10.48	28	9.2	18.8	17	18.4	19.5	16.8	1520	329	12	86	851	45	297	820	63.7155	63.3405	63.4647	112.407	112.277	110.3	81.6554	108.306	62.4585	30.6309	38.2125	24.2512	26.7071	30.2243	26.013
17924	T_235	Eragrostis tef	landrace	NA	EBI	NA	NA	SH3	Oromia	Misraq Wellega	Sibu Sire	36.8405	9.002	5	1691	19.7	14.2	0.74	11.61	29.9	10.9	19	18.6	19.9	21.4	18.4	1474	302	13	82	809	49	154	766	44.5855	44.714	44.6483	95.0841	95.252	95.2332	67.6339	79.4992	49.2853	27.7562	29.9929	23.8453	20.7671	19.2948	20.4234
17930	T_237	Eragrostis tef	landrace	NA	EBI	NA	NA	M2	Oromia	Misraq Wellega	Wama Hagelo	36.8195	8.8505	5	1575	20.5	14.6	0.73	11.63	30.9	11.1	19.8	19.5	20.5	22.2	19.3	1503	308	14	82	821	51	158	778	47.038	47.102	47.0607	97.0089	97.0441	97.0057	73.8861	78.9462	68.3638	28.4309	27.1647	28.3108	22.9682	22.4412	23.4332
17938	T_239	Eragrostis tef	landrace	NA	EBI	NA	NA	SH3	Oromia	Misraq Wellega	Gudoya Bila	37.0375	9.23383	5	1887	18.4	14.6	0.74	10.62	28.6	9.1	19.5	17.4	18.5	19.9	17.2	1411	314	11	87	799	42	272	769	44.095	44.2364	44.1659	94.1217	94.3559	94.3469	66.2548	79.0383	45.6514	26.7002	29.9045	21.0036	21.0686	18.8808	21.7133
17942	T_241	Eragrostis tef	landrace	NA	EBI	NA	NA	SH3	Oromia	Misraq Wellega	Leqa Dulecha	36.4842	8.90783	6	2170	17.7	13.4	0.79	10.61	27	10.1	16.9	16.4	18.3	19.1	16.3	1996	372	12	82	1064	49	184	1019	53.4147	53.3109	53.3328	100.377	100.18	100.108	78.6672	103.466	58.3703	32.8895	42.8083	26.281	25.29	26.7468	25.583
17945	T_242	Eragrostis tef	landrace	NA	EBI	NA	NA	SH2	Oromia	Ilubabor	Jimma Arjo	36.1423	8.78783	6	1732	19.8	14	0.71	12.96	30.1	10.5	19.6	18.7	19.8	21.7	18.4	1817	333	11	84	981	40	139	936	47.7738	49.9676	45.6133	96.0465	96.148	96.1194	68.8905	88.3486	44.2886	27.9029	33.9701	20.5976	21.2797	21.1164	19.9934
17948	T_243	Eragrostis tef	landrace	NA	EBI	NA	NA	SH3	Oromia	Misraq Wellega	Nunu Qumba	36.6702	8.803	5	2108	18.2	13.8	0.79	10.29	27.7	10.3	17.4	17	18.8	19.6	16.9	1887	367	14	81	1000	52	196	969	62.7345	62.3853	62.4997	97.4901	98.3882	96.5625	80.0464	109.458	56.5533	31.5695	43.2502	22.2215	24.3854	24.6768	25.1531
18385	T_86	Eragrostis tef	landrace	NA	EBI	NA	NA	M2	Amhara	North Shewa	Kewet	39.9038	10.0585	4	1260	23	14.9	0.63	19.64	34.9	11.3	23.6	24.8	21.1	25.3	20.3	1186	250	26	65	553	88	404	100	NA	NA	NA	NA	NA	NA	NA	NA	NA	NA	NA	NA	NA	NA	NA
18390	T_88	Eragrostis tef	landrace	NA	EBI	NA	NA	M2	Amhara	North Shewa	Kewet	39.9733	9.86933	3	1324	22.9	14.9	0.63	19.4	34.6	11.2	23.4	24.6	21	25.2	20.3	1177	238	26	64	542	86	404	97	48.0191	49.0124	47.0607	97.0089	97.0441	97.0057	78.9737	106.693	56.0991	28.9296	31.3186	25.8751	25.7422	27.1608	26.443
18393	T_87	Eragrostis tef	landrace	NA	EBI	NA	NA	M2	Amhara	North Shewa	Kewet	40.025	9.85	4	1251	23.2	15	0.63	20.38	35.1	11.4	23.7	25.1	21.2	25.6	20.4	1118	231	24	64	513	81	375	92	49.4906	49.49	49.473	96.0465	96.148	96.1194	75.7557	102.084	51.1023	29.6629	39.273	20.5976	24.6869	26.3328	24.2931
18395	T_90	Eragrostis tef	landrace	NA	EBI	NA	NA	M3	Amhara	North Shewa	Efratana Gidim	39.9067	10.343	4	1665	21.1	14.5	0.65	17.56	32.2	10	22.2	21.6	19.4	23.2	18.7	1087	241	21	74	559	88	266	89	45.5665	45.6692	45.6133	98.4525	98.3882	98.3351	76.5832	98.1197	57.4618	30.7189	33.1747	29.1227	23.2396	25.2564	21.2833
18396	T_100	Eragrostis tef	landrace	NA	EBI	NA	NA	M3	Amhara	North Shewa	Efratana Gidim	39.8758	10.3393	4	2101	17.8	13.8	0.69	13.73	27.8	8	19.8	18.1	15.9	19.6	15.9	1073	266	15	86	619	68	232	68	NA	NA	NA	NA	NA	NA	NA	NA	NA	NA	NA	NA	NA	NA	NA
18407	T_297	Eragrostis tef	landrace	NA	EBI	NA	NA	M3	Oromia	Mirab Shewa	Bako Tibe	37.2225	9.20433	3	2423	15.8	14.7	0.78	7.67	25.4	6.7	18.7	15	15.8	16.8	15	1530	342	11	88	866	48	298	866	44.3402	44.2364	44.6483	98.9337	98.8362	98.7782	75.9089	81.8038	71.5435	28.0496	27.7834	26.687	23.6316	23.8488	23.8632
18419	T_298	Eragrostis tef	landrace	NA	EBI	NA	NA	SH3	Oromia	Mirab Shewa	Dano	37.2703	8.67217	6	1850	19.4	15.1	0.77	9.97	29.4	9.9	19.5	18.4	19.2	20.8	18.2	1437	301	10	80	768	54	199	746	57.3388	57.1317	57.1926	100.377	100.628	99.6645	73.7329	96.9214	50.1938	29.1642	34.2353	23.8453	22.7873	22.7724	22.5732
18422	T_299	Eragrostis tef	landrace	NA	EBI	NA	NA	M3	Oromia	Mirab Shewa	Cheliya	37.4675	8.97417	5	2581	14.9	14.3	0.79	7.41	24.1	6.2	17.9	14.1	14.9	15.9	14.1	1430	301	13	83	798	51	294	798	47.038	47.102	47.0607	100.377	100.18	100.108	68.0017	83.3708	46.5599	26.0549	30.1697	18.9738	21.5812	21.1164	20.8533
18428	T_300	Eragrostis tef	landrace	NA	EBI	NA	NA	M3	Oromia	Mirab Shewa	Tok Kuteya	37.7593	8.85033	6	2402	16.2	14.5	0.78	9.38	25.6	7.2	18.4	15.1	16	17.4	15.1	1210	254	10	84	675	42	247	675	45.5665	45.6692	45.6133	95.0841	95.252	95.2332	74.2233	94.7091	53.8278	26.5829	25.1319	25.0631	21.9732	21.3648	21.7133
18430	T_301	Eragrostis tef	landrace	NA	EBI	NA	NA	M3	Oromia	Mirab Shewa	Tok Kuteya	37.7413	8.92283	3	2106	17.4	15.1	0.76	11.62	27.2	7.5	19.7	16.5	16.9	18.9	16.2	1095	237	7	84	623	40	220	602	49.4906	49.49	49.473	98.4525	98.3882	98.3351	77.4413	98.3963	59.7331	33.4762	41.0407	29.5287	25.5915	26.3328	26.873
18466	T_272	Eragrostis tef	landrace	NA	EBI	NA	NA	SH3	Oromia	Misraq Shewa	Leban Chukala	38.9347	8.47567	5	1655	20.2	14.7	0.74	12.02	29.9	10.1	19.8	20	18.6	21.7	18.6	856	214	8	95	524	33	162	33	61.7534	61.9077	61.0523	100.377	101.076	99.2213	87.9842	123.654	66.0925	34.3268	45.8133	27.4989	24.2949	26.9124	22.5732
18470	T_273	Eragrostis tef	landrace	NA	EBI	NA	NA	SH3	Oromia	Misraq Shewa	Leban Chukala	38.8687	8.485	4	1764	19.6	14.7	0.75	11.25	29.1	9.5	19.6	19.2	18.1	21.1	18.1	895	216	7	92	536	32	178	32	43.1139	43.7588	42.7185	95.5653	95.7	95.6763	68.5534	84.5692	47.0141	27.1696	29.1091	23.0334	20.2545	20.3712	17.8435
18471	T_104	Eragrostis tef	landrace	NA	EBI	NA	NA	SM3	Amhara	North Shewa	Baso & Werena	39.4185	9.77083	2	2747	14.4	12.7	0.68	14.84	23.7	5.1	18.6	14.8	12.5	16.4	12.5	959	318	5	116	655	29	167	29	NA	NA	NA	NA	NA	NA	NA	NA	NA	NA	NA	NA	NA	NA	NA
18472	T_105	Eragrostis tef	landrace	NA	EBI	NA	NA	NA	NA	NA	Mafudmezezo Mojana	NA	NA	3	NA	NA	NA	NA	NA	NA	NA	NA	NA	NA	NA	NA	NA	NA	NA	NA	NA	NA	NA	NA	NA	NA	NA	NA	NA	NA	NA	NA	NA	NA	NA	NA	NA	NA	NA
18477	T_101	Eragrostis tef	landrace	NA	EBI	NA	NA	SM3	Amhara	North Shewa	Mafudmezezo Mojana	39.607	9.97617	2	2389	16.6	13	0.71	12.83	25.7	7.4	18.3	16.6	14.9	18.4	14.9	965	295	7	99	593	43	207	43	44.3402	44.714	44.1659	98.9337	98.8362	98.7782	78.9737	103.005	59.7331	33.8282	42.5432	29.1227	25.4407	26.3328	26.443
18480	T_106	Eragrostis tef	landrace	NA	EBI	NA	NA	M4	Amhara	North Shewa	Menz Gera	39.5892	10.3075	1	2954	12.8	13.6	0.72	12.37	22	3.2	18.8	13.3	11.1	14.4	11.1	1125	315	10	107	744	43	197	43	45.076	45.6692	44.6483	106.152	105.557	105.425	66.5612	77.6556	47.9226	27.9029	28.2253	25.8751	22.5762	21.7788	23.0032
18499	T_275	Eragrostis tef	landrace	NA	EBI	NA	NA	M4	Oromia	North Shewa	Debre Libanos	38.875	9.66767	6	2624	14.4	13.4	0.71	12.82	24	5.2	18.8	13.6	13	16.1	13	1033	298	5	104	669	28	188	28	61.2629	60.9525	61.0523	107.114	107.349	105.425	89.7005	116.832	77.903	38.3162	47.6694	36.8359	29.5113	32.1287	32.0326
18952	T_283	Eragrostis tef	landrace	NA	EBI	NA	NA	SH3	Oromia	Mirab Hararghe	Doba	41.0912	9.20233	6	1862	19.2	13.3	0.77	10.59	27.8	10.6	17.2	19.4	17.7	20.5	17.7	1030	190	10	66	483	63	316	63	59.3009	59.0421	59.1224	103.746	104.213	102.323	82.8047	112.223	62.0043	31.3349	37.2403	27.0929	24.8678	25.5876	25.583
18953	T_208	Eragrostis tef	landrace	NA	EBI	NA	NA	SH3	Oromia	Misraq Harerge	Meta	41.5672	9.22283	6	2281	15.2	12.6	0.83	6.58	22.9	7.8	15.1	14.8	14.5	16	14.5	1067	237	9	73	528	58	321	58	43.6044	43.7588	43.6834	94.1217	94.3559	94.3469	62.2705	66.133	46.5599	24.9696	23.8062	21.8155	20.3148	20.9508	17.4136
18968	T_192	Eragrostis tef	landrace	NA	EBI	NA	NA	H3	Oromia	Bale	Gololcha	40.4755	7.38867	3	2029	17.6	14.2	0.78	8.21	26.2	8.2	18	18.3	16.8	18.3	16.3	1156	216	9	69	504	57	504	76	43.6044	43.7588	43.6834	96.0465	96.148	96.1194	74.9895	88.7173	62.0043	29.8095	29.9929	29.5287	22.9682	22.0272	23.8632
19095	T_421	Eragrostis tef	landrace	NA	EBI	NA	NA	SM3	Tigray	Debubawi	Enderta	39.524	13.3712	3	2194	18	15.2	0.71	14.88	28.5	7.2	21.3	18.4	16	19.9	16	562	199	2	142	426	9	94	9	47.5285	47.5796	47.5432	100.858	100.628	100.551	73.7635	87.7955	59.2788	29.8682	33.705	26.281	21.8827	20.7024	22.1433
19102	T_423	Eragrostis tef	landrace	NA	EBI	NA	NA	SM3	Tigray	Debubawi	Hintalo Wajirat	39.5172	13.1753	4	2177	18.5	15.7	0.71	15.16	29.6	7.6	22	18.9	16.6	20.5	16.5	530	189	2	141	408	8	82	12	45.5665	45.6692	45.6133	93.1593	93.4599	93.4606	79.0963	101.07	62.0043	29.5749	38.1241	21.4095	25.109	27.492	24.2931
19111	T_424	Eragrostis tef	landrace	NA	EBI	NA	NA	SM3	Tigray	Debubawi	Adigudem	39.5368	13.0675	4	2185	18.8	15.9	0.7	15.97	30.4	7.8	22.6	19.3	16.8	20.8	16.7	556	188	4	131	404	14	90	20	44.5855	44.714	44.6483	97.4901	97.4921	97.4488	65.6418	70.7421	52.0108	25.0869	22.392	23.4393	20.1038	16.6452	21.2833
19113	T_425	Eragrostis tef	landrace	NA	EBI	NA	NA	SM4	Tigray	Debubawi	Adigudem	39.4897	13.054	1	2501	16.4	15.9	0.71	15.32	27.8	5.6	22.2	16.9	14.5	18.4	14.5	604	204	3	131	439	13	90	13	57.8293	57.6093	57.675	98.4525	98.8362	97.8919	79.2802	98.3963	65.184	32.0095	37.9473	28.3108	21.2194	22.6068	18.2735
19115	T_426	Eragrostis tef	landrace	NA	EBI	NA	NA	SM3	Tigray	Debubawi	Adigudem	39.489	13.0708	4	2197	18.6	15.9	0.7	15.37	30.2	7.6	22.6	19	16.7	20.6	16.7	565	193	4	132	416	13	91	18	47.5285	47.5796	47.5432	101.821	101.524	101.437	82.0385	99.779	71.9978	32.1562	37.5054	29.1227	26.3453	26.3328	29.0228
19133	T_365	Eragrostis tef	landrace	NA	EBI	NA	NA	SM3	Tigray	Mehakelegnaw	Hagere Selam	39.1552	13.6253	1	2508	16	15.4	0.73	13.75	25.9	4.9	21	16.4	14.2	17.9	14.2	679	217	2	125	482	8	141	8	49.4906	49.9676	48.9906	95.5653	95.7	95.6763	74.9895	95.6309	55.1906	32.4495	39.273	28.3108	27.0991	27.9888	29.4528
19136	T_366	Eragrostis tef	landrace	NA	EBI	NA	NA	SM2	Tigray	Mehakelegnaw	Hagere Selam	39.1365	13.6387	2	2509	15.9	15.4	0.73	13.56	25.8	4.8	21	16.4	14.1	17.8	14.1	682	218	2	125	483	8	142	8	54.8862	54.7437	54.7802	98.9337	98.8362	98.7782	80.0464	108.075	57.9161	32.1269	42.278	24.6572	23.7823	27.1608	20.8533
19138	T_367	Eragrostis tef	landrace	NA	EBI	NA	NA	SM2	Tigray	Mehakelegnaw	Abergele	39.0265	13.4743	4	1387	24.1	16.8	0.73	16.27	35.5	12.6	22.9	23.7	22.9	26.4	22.6	644	213	10	124	457	36	114	37	43.3592	43.7588	43.2009	89.791	90.3237	90.3587	63.1133	63.1372	52.0108	25.2922	22.1269	24.2512	21.7018	18.9636	23.4332
19142	T_368	Eragrostis tef	landrace	NA	EBI	NA	NA	SM2	Tigray	Mehakelegnaw	Abergele	38.8403	13.3725	1	1378	24.2	17.1	0.73	17.36	35.9	12.6	23.3	23.6	23.1	26.6	22.7	675	226	7	128	496	27	81	30	44.8307	45.1916	44.6483	96.0465	96.148	96.1194	65.5192	71.2952	51.1023	24.2363	20.7128	22.6274	19.6816	20.04	16.5536
19153	T_370	Eragrostis tef	landrace	NA	EBI	NA	NA	SM2	Tigray	Mehakelegnaw	Kola Temben	38.993	13.8383	1	1402	23.6	16.7	0.7	17.48	35.4	11.8	23.6	23.3	22.2	26.1	21.9	654	201	14	114	444	45	119	47	44.095	44.2364	44.1659	89.3098	89.8756	89.9156	73.7635	85.0301	62.0043	28.0496	24.69	29.5287	21.3702	20.1228	21.2833
19154	T_371	Eragrostis tef	landrace	NA	EBI	NA	NA	SM2	Tigray	Mehakelegnaw	Temben Werka	39	13.8385	1	1408	23.7	16.7	0.71	17.17	35.4	11.9	23.5	23.3	22.3	26.1	21.9	654	199	15	113	440	48	118	49	43.1139	43.2812	43.2009	90.2721	90.7717	90.8018	73.4571	82.7256	63.367	28.6362	26.4576	29.5287	22.727	22.6068	22.5732
19174	T_373	Eragrostis tef	landrace	NA	EBI	NA	NA	SM2	Tigray	Mehakelegnaw	Rama	38.8027	14.3582	1	1431	23	16.6	0.71	17.62	34.7	11.4	23.3	22.8	21.4	25.5	21.2	675	186	14	105	435	46	130	49	44.5855	45.6692	43.6834	93.1593	93.4599	93.4606	79.5867	97.4745	67.001	32.5375	38.2125	29.5287	23.6014	25.008	22.5732
19175	T_374	Eragrostis tef	landrace	NA	EBI	NA	NA	SM2	Tigray	Mehakelegnaw	Adwa	38.8	14.391	3	1393	23.2	16.6	0.7	17.74	34.9	11.5	23.4	23	21.6	25.8	21.3	670	183	15	104	427	49	129	51	41.6424	41.3708	42.236	88.3474	88.9796	89.0293	71.8787	83.6474	57.7798	28.0202	28.5788	25.8751	21.9129	20.7852	22.1433
19189	T_427	Eragrostis tef	landrace	NA	EBI	NA	NA	SM3	Tigray	Debubawi	Enderta	39.5072	13.5233	4	2011	19.4	15.3	0.72	14.04	29.6	8.5	21.1	20.1	17.5	21.3	17.5	581	198	6	131	418	20	104	20	54.8862	54.7437	54.7802	97.9713	97.9401	97.8919	79.0043	105.402	57.4618	31.5402	37.8589	27.0929	23.2396	24.8424	21.7133
19227	T_375	Eragrostis tef	landrace	NA	EBI	NA	NA	SM3	Tigray	Mehakelegnaw	Laelay Maychew	38.7595	14.1205	1	2095	18.5	15.9	0.7	15.43	29.6	6.9	22.7	17.8	17	20.7	16.9	643	214	1	133	480	6	65	16	52.9242	55.6989	49.9555	97.4901	97.9401	97.0057	78.0236	103.835	56.0991	33.2709	41.3058	28.7167	25.7422	27.5748	26.013
19252	T_377	Eragrostis tef	landrace	NA	EBI	NA	NA	SM3	Tigray	Mehakelegnaw	Adwa	39.0067	14.2255	4	2194	17.8	15.9	0.7	14.91	28.5	6	22.5	17.9	16.1	19.8	16	620	198	2	125	442	8	132	16	NA	NA	NA	NA	NA	NA	NA	NA	NA	NA	NA	NA	NA	NA	NA
19280	T_378	Eragrostis tef	landrace	NA	EBI	NA	NA	SM3	Tigray	Mehakelegnaw	Axum	38.601	14.1912	1	1942	19.7	16.1	0.7	16.24	31.2	8.3	22.9	19.2	18.4	22.1	18.2	726	239	1	133	546	6	64	17	NA	NA	NA	NA	NA	NA	NA	NA	NA	NA	NA	NA	NA	NA	NA
19297	T_441	Eragrostis tef	landrace	NA	EBI	NA	NA	SM3	Tigray	Semien Mi'irabaw	Medbay Zana	38.4232	14.0687	1	2051	19.1	15.8	0.7	16.14	30.5	8.2	22.3	18.4	18.1	21.4	17.7	809	271	0	135	619	3	165	611	55.3768	56.6541	53.8153	97.9713	98.3882	97.4488	82.1917	112.684	59.7331	32.3029	43.6922	23.8453	27.5514	32.1287	26.443
19300	T_442	Eragrostis tef	landrace	NA	EBI	NA	NA	SM3	Tigray	Semien Mi'irabaw	Zana	38.455	13.9667	4	2022	19.5	15.8	0.7	16.14	30.9	8.5	22.4	18.7	18.5	21.7	18	800	267	1	136	613	4	69	602	47.038	47.102	47.0607	92.1969	92.5638	92.5744	69.1663	88.2564	45.1971	28.6362	37.0635	19.7857	20.7671	21.7788	17.8435
19311	T_83	Eragrostis tef	landrace	NA	EBI	NA	NA	M3	Amhara	Semen Gondar	Dabat	37.8263	12.9523	3	2220	17.9	14.6	0.73	13.39	28.3	8.3	20	17.2	17.4	19.9	16.6	955	293	2	122	683	11	127	651	44.095	44.2364	44.1659	95.5653	95.7	95.6763	67.6646	80.0523	48.8311	25.5562	25.1319	22.2215	20.948	20.2056	19.9934
19315	T_84	Eragrostis tef	landrace	NA	EBI	NA	NA	M4	Amhara	Semen Gondar	Amba Giorgis	37.701	12.8097	3	2758	13.4	13.7	0.72	10.98	23.1	4.1	19	13.3	12.9	14.9	12.2	1089	328	4	118	756	16	146	73	47.038	47.102	47.0607	95.5653	95.7	95.6763	66.929	78.7618	47.9226	26.3776	29.3742	20.5976	20.1641	19.2948	18.7035
19325	T_81	Eragrostis tef	landrace	NA	EBI	NA	NA	M3	Amhara	Semen Gondar	Maksegnit	37.5248	12.4055	3	1891	20.4	14.5	0.76	13.36	30.4	11.5	18.9	19	20.3	22.3	18.9	1059	313	2	120	766	11	106	724	46.057	46.1468	46.0958	97.9713	97.9401	97.8919	69.5035	80.9741	53.3736	27.7562	27.3414	26.281	21.2496	19.7916	21.2833
19352	T_130	Eragrostis tef	landrace	NA	EBI	NA	NA	M3	Amhara	Debub Gondar	Libu Kemekem	37.685	12.1413	2	1989	19.8	15.2	0.77	11.26	30	10.3	19.7	18.8	20.3	21.4	18.5	1076	343	2	129	798	9	71	787	60.5271	61.4301	59.1224	97.0089	97.9401	96.1194	85.7163	115.911	67.001	35.2362	47.2274	28.7167	28.3052	30.8867	29.8828
19428	T_34	Eragrostis tef	landrace	NA	EBI	NA	NA	M3	Amhara	Misraq Gojjam	Amanuel	37.5735	10.3887	6	2173	17.3	13.7	0.74	11.92	27	8.6	18.4	16	17.3	19.1	16	1338	325	8	97	830	35	197	830	NA	NA	NA	NA	NA	NA	NA	NA	NA	NA	NA	NA	NA	NA	NA
19441	T_32	Eragrostis tef	landrace	NA	EBI	NA	NA	M3	Amhara	Misraq Gojjam	Machakel	37.5258	10.5058	5	2212	17.1	13.7	0.74	10.97	26.6	8.3	18.3	15.9	16.9	18.8	15.9	1398	333	9	96	865	40	200	865	NA	NA	NA	NA	NA	NA	NA	NA	NA	NA	NA	NA	NA	NA	NA
19448	T_161	Eragrostis tef	landrace	NA	EBI	NA	NA	M3	Amhara	Mirab Gojjam	Bure	37.1085	10.7035	2	2039	17.6	14.4	0.72	9.65	27.5	7.7	19.8	16.7	17.1	19.1	16.7	1585	361	9	95	964	41	206	964	48.5096	48.5348	48.5081	97.4901	97.4921	97.4488	74.2233	97.4745	51.1023	28.9002	33.4398	23.8453	22.727	23.4348	21.7133
19449	T_164	Eragrostis tef	landrace	NA	EBI	NA	NA	M3	Amhara	Mirab Gojjam	Bure	37.1035	10.7027	5	2068	17.5	14.4	0.72	9.62	27.4	7.6	19.8	16.6	17	18.9	16.6	1602	364	10	95	970	44	209	970	44.095	44.2364	44.1659	93.6405	93.9079	93.9038	67.5113	81.8959	46.5599	28.4896	30.8767	25.0631	21.3099	19.1292	22.1433
19463	T_8	Eragrostis tef	landrace	NA	EBI	NA	NA	SH3	Amhara	Agew Awi	Kosober	36.817	10.9552	6	2631	14	14	0.72	8.52	23.6	4.4	19.2	13.4	13.6	15.3	13.3	2003	436	26	82	1105	109	304	1103	49.7359	51.8781	47.5432	97.4901	97.4921	97.4488	68.7066	82.2647	49.7396	26.8762	32.6444	18.9738	24.2045	23.352	26.013
19472	T_172	Eragrostis tef	landrace	NA	EBI	NA	NA	M2	Benishangul_Gumuz	Metekel	Metekel	35.6565	11.0047	5	696	26.3	14.8	0.69	14.87	37.8	16.4	21.4	24.7	26.2	28.5	24.7	1270	309	0	108	813	2	145	813	43.6044	44.2364	43.2009	94.1217	94.3559	94.3469	65.9483	78.1165	45.6514	26.7296	28.6672	22.2215	20.0133	18.4668	19.1335
19475	T_11	Eragrostis tef	landrace	NA	EBI	NA	NA	SH4	Amhara	Agew Awi	Enjebara	36.9068	11.021	6	2575	14.7	14.2	0.73	8.66	24.3	4.9	19.4	14.2	14.2	16	14	1934	426	25	84	1084	100	279	126	NA	NA	NA	NA	NA	NA	NA	NA	NA	NA	NA	NA	NA	NA	NA
19495	T_13	Eragrostis tef	landrace	NA	EBI	NA	NA	SH4	Amhara	Agew Awi	Kosober	36.9565	10.9678	6	2612	14.5	14.1	0.73	8.55	24	4.7	19.3	14	13.9	15.7	13.7	1990	435	27	82	1099	112	303	134	45.5665	45.6692	45.6133	96.0465	96.148	96.1194	70.852	82.7256	55.6448	25.8496	23.3643	24.6572	23.6617	23.5176	24.2931
19499	T_9	Eragrostis tef	landrace	NA	EBI	NA	NA	M3	Amhara	Agew Awi	Tilili	37.0413	10.8365	6	2555	14.6	14	0.73	8.69	24	5	19	13.9	14.1	15.9	13.9	1927	423	26	83	1075	103	296	1075	NA	NA	NA	NA	NA	NA	NA	NA	NA	NA	NA	NA	NA	NA	NA
19522	T_35	Eragrostis tef	landrace	NA	EBI	NA	NA	M3	Amhara	Misraq Gojjam	Guzamn	37.6415	10.3208	4	2220	17.2	13.5	0.74	12.03	26.7	8.6	18.1	15.7	17.2	18.9	15.7	1297	318	7	97	806	33	197	806	NA	NA	NA	NA	NA	NA	NA	NA	NA	NA	NA	NA	NA	NA	NA
19529	T_31	Eragrostis tef	landrace	NA	EBI	NA	NA	M3	Amhara	Misraq Gojjam	Guzamn	37.5048	10.2068	6	2079	17.7	14.1	0.74	11.72	27.6	8.6	19	16.4	17.6	19.4	16.4	1302	322	6	99	807	28	197	807	44.095	44.2364	44.1659	95.5653	95.7	95.6763	74.8362	92.4045	57.9161	29.6629	31.3186	27.9048	22.6969	23.352	21.7133
19545	T_44	Eragrostis tef	landrace	NA	EBI	NA	NA	M3	Amhara	Misraq Gojjam	Aneded	37.8578	10.309	6	2442	16.2	12.9	0.74	12.94	25.4	8.1	17.3	14.7	15.7	18.1	14.7	1264	312	9	97	787	38	202	787	45.5665	45.6692	45.6133	95.0841	95.252	95.2332	72.0779	91.9436	50.1938	26.7296	29.1091	21.8155	23.7823	24.6768	23.4332
19555	T_38	Eragrostis tef	landrace	NA	EBI	NA	NA	M3	Amhara	Misraq Gojjam	Bichena	38.0542	10.302	3	2472	16.4	12.9	0.73	13.53	25.6	8	17.6	14.7	15.8	18.2	14.7	1202	316	6	101	761	29	198	761	45.8117	45.6692	46.0958	94.1217	94.3559	94.3469	76.8283	93.3263	62.9128	29.5162	34.8539	24.2512	23.1793	24.2628	22.1433
24275	T_171	Eragrostis tef	landrace	NA	EBI	NA	NA	SH2	Benishangul_Gumuz	Asosa	Asosa	34.6387	10.0583	5	1511	21.8	12.5	0.69	15.98	32.3	14.3	18	20.3	22.7	24.1	20.2	1234	233	0	90	668	5	76	666	61.7534	61.4301	61.5348	108.076	108.245	106.311	76.9203	103.743	52.9193	30.6015	39.4498	23.0334	22.2747	21.7788	22.1433
24278	T_174	Eragrostis tef	landrace	NA	EBI	NA	NA	SH2	Benishangul_Gumuz	Metekel	Bulen	36.1423	10.6718	5	1352	21.8	14.5	0.68	12.98	33.1	11.8	21.3	20.5	21.7	23.8	20.5	1709	399	2	102	1057	11	211	1057	61.7534	60.9525	62.0173	102.302	102.868	100.994	76.859	94.8012	61.55	29.8975	35.561	24.6572	24.2346	27.9888	21.2833
24279	T_175	Eragrostis tef	landrace	NA	EBI	NA	NA	SH3	Benishangul_Gumuz	Metekel	Wenbera	35.7018	10.5705	6	2504	15.9	13.2	0.7	11.02	25.9	7.3	18.6	14.7	16.1	17.4	14.7	1947	401	11	89	1082	49	128	1082	45.5665	45.6692	45.6133	95.0841	95.252	95.2332	75.4798	94.2482	58.0069	26.7296	27.3414	23.4393	23.0285	23.8488	22.1433
24282	T_2	Eragrostis tef	landrace	NA	EBI	NA	NA	SH3	Amhara	Agew Awi	Zigem	36.5415	10.8337	5	1983	17.9	14.6	0.68	9.69	28.6	7.4	21.2	17.2	17.5	19.4	17.2	1788	410	10	96	1066	47	205	1066	47.2833	47.102	47.5432	93.6405	93.9079	93.9038	79.7092	103.374	61.55	33.5642	40.422	30.3406	22.8778	23.4348	22.1433
24285	T_14	Eragrostis tef	landrace	NA	EBI	NA	NA	SH3	Amhara	Agew Awi	Banja	36.9535	10.9595	6	2585	14.7	14.2	0.73	8.53	24.2	4.8	19.4	14.2	14.1	15.9	13.9	1984	433	27	81	1095	112	301	134	49.0001	49.0124	48.9906	94.6029	94.8039	94.79	73.6103	86.8737	59.7331	29.5162	33.0863	25.8751	22.5762	23.0208	21.7133
24313	T_323	Eragrostis tef	landrace	NA	EBI	NA	NA	SH3	Oromia	Mirab Welega	Gimbi	35.8853	9.12583	5	1819	19.7	13.5	0.76	13.49	29.6	11.9	17.7	18.2	20.2	21.6	18.1	1877	371	5	91	1060	21	107	1020	47.038	47.102	47.0607	97.4901	97.4921	97.4488	68.2316	79.4531	51.1023	26.4656	27.8717	22.2215	22.727	22.6068	22.5732
24324	T_263	Eragrostis tef	landrace	NA	EBI	NA	NA	M3	Oromia	Horo Guduru	Guduru	37.4362	9.4925	6	2285	16	15.5	0.75	9.18	26.3	5.9	20.4	15.7	15.5	17.3	15	1249	330	5	100	767	23	204	77	44.095	44.2364	44.1659	96.0465	96.148	96.1194	83.1725	115.173	60.1873	33.8575	41.3058	30.3406	25.2296	24.0972	28.1629
24325	T_264	Eragrostis tef	landrace	NA	EBI	NA	NA	M3	Oromia	Horo Guduru	Guduru	37.4707	9.4705	5	2317	16	15.4	0.75	9.2	26.2	5.9	20.3	15.3	15.5	17.2	15	1245	325	5	99	762	23	207	76	61.2629	61.4301	60.5699	101.821	101.972	100.994	91.3402	130.06	69.7265	32.4495	39.715	27.9048	25.1392	25.9188	26.013
24326	T_265	Eragrostis tef	landrace	NA	EBI	NA	NA	M3	Oromia	Horo Guduru	Guduru	37.4725	9.47067	5	2317	16	15.4	0.75	9.2	26.2	5.9	20.3	15.3	15.5	17.2	15	1245	325	5	99	762	23	207	76	62.2439	61.9077	62.0173	101.34	101.972	100.108	87.5551	128.816	59.7331	32.8895	44.1341	25.0631	27.4006	31.7147	26.443
24349	T_266	Eragrostis tef	landrace	NA	EBI	NA	NA	M3	Oromia	Horo Guduru	Guduru	37.4265	9.45583	6	2307	15.9	15.4	0.75	9.08	26.2	5.8	20.4	15.3	15.4	17.2	14.9	1264	329	5	99	772	24	210	78	60.7724	59.5197	61.5348	99.4149	99.7322	98.7782	79.4334	99.779	64.2755	31.2175	35.1191	28.7167	24.6266	25.3392	25.1531
24352	T_267	Eragrostis tef	landrace	NA	EBI	NA	NA	M3	Oromia	Horo Guduru	Jimma Rare	37.3208	9.18667	6	2583	15.1	14.5	0.78	7.06	24.5	6.1	18.4	14.4	15	16.1	14.4	1508	333	12	87	857	49	295	857	54.8862	54.7437	54.7802	99.8961	99.7322	99.6645	74.3765	95.17	53.8278	29.9562	36.1797	24.2512	23.3301	24.2628	22.5732
26175	T_393	Eragrostis tef	landrace	NA	EBI	NA	NA	SM2	Tigray	Mehakelegnaw	Atibiweberta	38.7538	13.7698	1	1217	24.8	17.3	0.7	19.44	37.3	12.7	24.6	24.2	23.4	27.5	23	659	204	11	120	463	34	124	37	47.038	47.102	47.0607	99.8961	99.7322	99.6645	65.4886	73.0466	49.2853	27.6096	28.2253	25.0631	19.9229	19.4604	17.8435
26179	T_392	Eragrostis tef	landrace	NA	EBI	NA	NA	SM4	Tigray	Misraqawi	Ganta Afeshum	39.4427	14.319	3	2480	16.1	15.7	0.69	16.45	26.8	4.3	22.5	17.1	14.3	18.2	13.8	552	149	6	102	333	25	137	40	47.038	47.102	47.0607	98.4525	98.3882	98.3351	71.5569	78.3931	62.0043	25.9962	22.4804	25.8751	22.8175	19.9572	25.583
26194	T_358	Eragrostis tef	landrace	NA	EBI	NA	NA	SM2	Tigray	Mehakelegnaw	Naedier Adiet	38.624	13.768	1	2033	19.8	16.1	0.71	15.48	31.2	8.6	22.6	19.1	18.8	22	18.4	754	249	2	138	585	7	69	564	51.4527	51.4005	51.4029	98.9337	98.8362	98.7782	83.2031	110.195	65.184	33.6522	42.8967	28.3108	24.0236	28.6512	19.9934
26204	T_361	Eragrostis tef	landrace	NA	EBI	NA	NA	SM2	Tigray	Mehakelegnaw	Na	38.805	14.3353	1	1535	22.5	16.6	0.7	17.45	34.2	10.8	23.4	22.2	21	25	20.7	679	193	11	111	452	38	132	42	58.8104	58.5645	58.64	99.4149	100.18	98.3351	81.1804	105.494	63.8213	32.8895	41.0407	27.9048	24.3552	25.836	23.8632
26212	T_359	Eragrostis tef	landrace	NA	EBI	NA	NA	SM3	Tigray	Mehakelegnaw	Dinglet Temben	39.173	13.6248	4	2706	14.6	15.4	0.73	13.73	24.5	3.6	20.9	14.6	12.8	16.5	12.8	687	218	2	121	480	8	143	8	51.2074	51.8781	50.438	108.076	107.349	107.198	74.3765	97.4745	51.5566	30.2202	33.4398	27.4989	23.722	19.9572	28.1629
26213	T_410	Eragrostis tef	landrace	NA	EBI	NA	NA	SM3	Tigray	Mehakelegnaw	Mikael Abya	39.1928	13.6075	3	2387	16.8	15.4	0.73	13.56	26.7	5.7	21	17.2	15.1	18.7	15.1	661	214	2	128	481	9	133	9	49.0001	49.0124	48.9906	98.9337	98.8362	98.7782	77.5945	104.388	54.2821	32.4495	42.3664	25.4691	25.5915	27.5748	25.583
26216	T_360	Eragrostis tef	landrace	NA	EBI	NA	NA	SM2	Tigray	Mehakelegnaw	Tenkua Abergela	39.0862	13.5545	1	1807	22.2	16.5	0.73	14.69	33.2	10.9	22.3	21.5	21.2	24.1	20.7	691	253	4	140	541	20	77	500	62.2439	61.9077	62.0173	111.926	111.829	109.856	76.5219	96.0918	59.2788	32.7429	41.9245	26.687	23.6316	24.2628	23.4332
26217	T_411	Eragrostis tef	landrace	NA	EBI	NA	NA	SM3	Tigray	Debubawi	Hmtela Wasirat	39.4917	13.0878	2	2102	19.3	15.9	0.7	15.4	30.7	8.3	22.4	19.6	17.3	21.3	17.3	545	189	3	135	406	11	87	11	59.7914	59.5197	59.6049	99.8961	100.628	98.7782	83.5709	109.919	66.5468	34.2095	42.8083	29.9346	25.1392	28.4028	23.4332
26218	T_356	Eragrostis tef	landrace	NA	EBI	NA	NA	SM3	Tigray	Debubawi	Hintal Wejirta	39.4915	13.088	4	2129	19.1	15.9	0.7	15.16	30.5	8.1	22.4	19.5	17.2	21	17.1	548	190	3	136	409	11	88	15	43.3592	43.7588	43.2009	96.0465	96.148	96.1194	64.232	65.119	53.3736	25.5562	24.2481	23.0334	21.0686	20.1228	20.4234
26220	T_428	Eragrostis tef	landrace	NA	EBI	NA	NA	SM4	Tigray	Debubawi	Alaje	39.522	12.957	4	2631	15.3	15.9	0.7	15.81	26.9	4.4	22.5	16.1	13.4	17.4	13.4	641	212	5	130	465	18	250	18	43.6044	43.7588	43.6834	96.0465	96.148	96.1194	70.239	84.5692	52.0108	28.4309	33.7933	22.2215	19.6515	17.8872	18.7035
26336	T_21	Eragrostis tef	landrace	NA	EBI	NA	NA	M3	Amhara	Misraq Gojjam	Anadada	37.8038	10.2765	6	2464	15.9	12.8	0.73	12.48	25.1	7.8	17.3	14.5	15.5	17.7	14.5	1285	311	10	95	794	41	207	794	NA	NA	NA	NA	NA	NA	NA	NA	NA	NA	NA	NA	NA	NA	NA
26344	T_19	Eragrostis tef	landrace	NA	EBI	NA	NA	M3	Amhara	Misraq Gojjam	Machakel	37.3687	10.4197	6	2112	17.4	14	0.74	10.87	27	8.2	18.8	16.2	17.2	19	16.2	1442	337	9	95	882	38	208	882	58.3198	57.6093	58.64	97.9713	98.3882	97.4488	72.5376	92.4045	51.1023	29.6335	35.6494	23.8453	21.8827	23.1864	19.5634
26345	T_20	Eragrostis tef	landrace	NA	EBI	NA	NA	M3	Amhara	Misraq Gojjam	Machakel	37.4077	10.4375	6	2130	17.4	14	0.74	10.96	27.1	8.2	18.9	16.2	17.2	19.1	16.2	1428	336	9	96	877	38	206	877	63.225	62.8629	62.9822	111.926	111.829	109.856	85.1033	122.363	58.8246	33.0362	46.7855	23.0334	22.4255	23.4348	20.8533
26346	T_26	Eragrostis tef	landrace	NA	EBI	NA	NA	M3	Amhara	Misraq Gojjam	Macbakal	37.4077	10.4375	6	2130	17.4	14	0.74	10.96	27.1	8.2	18.9	16.2	17.2	19.1	16.2	1428	336	9	96	877	38	206	877	60.7724	60.4749	60.5699	93.6405	94.8039	93.0175	72.0779	87.3346	54.7363	30.1322	35.3842	25.4691	23.3301	24.2628	22.5732
26349	T_27	Eragrostis tef	landrace	NA	EBI	NA	NA	M3	Amhara	Misraq Gojjam	Machakel	37.5903	10.486	6	2453	15.8	13.2	0.75	10.46	24.9	7.5	17.4	14.6	15.8	17.4	14.6	1440	331	14	92	875	53	219	875	NA	NA	NA	NA	NA	NA	NA	NA	NA	NA	NA	NA	NA	NA	NA
26351	T_25	Eragrostis tef	landrace	NA	EBI	NA	NA	M3	Amhara	Misraq Gojjam	Machakal	37.5202	10.5203	6	2087	17.8	14	0.74	11.3	27.5	8.8	18.7	16.6	17.6	19.6	16.6	1369	334	7	98	856	33	191	856	61.5082	64.7733	57.675	115.294	114.965	112.958	81.732	110.841	60.1873	34.5028	46.7855	27.0929	24.2346	22.1928	27.3029
26354	T_28	Eragrostis tef	landrace	NA	EBI	NA	NA	M3	Amhara	Misraq Gojjam	Sehah	37.6895	10.5192	6	2573	15.3	13.1	0.75	10.89	24.3	7	17.3	14.1	15.3	16.9	14.1	1435	336	15	93	877	56	220	877	45.5665	45.6692	45.6133	111.926	110.933	110.743	70.5455	83.6474	53.8278	25.8496	25.1319	23.0334	25.0186	28.4856	23.0032
26358	T_22	Eragrostis tef	landrace	NA	EBI	NA	NA	M2	Amhara	Horo Guduru	Yagadal	37.3692	10.0397	6	1237	22.6	15.1	0.72	13.92	33.5	12.6	20.9	21.9	22.2	24.7	21.4	1091	280	2	105	696	12	159	687	NA	NA	NA	NA	NA	NA	NA	NA	NA	NA	NA	NA	NA	NA	NA
26359	T_18	Eragrostis tef	landrace	NA	EBI	NA	NA	M3	Amhara	Misraq Gojjam	Zagab	37.3688	10.386	6	2048	17.8	14.1	0.73	10.94	27.6	8.5	19.1	16.6	17.6	19.4	16.6	1407	334	7	97	866	32	203	866	44.5855	44.714	44.6483	95.0841	95.252	95.2332	68.0324	76.5495	53.3736	26.7002	27.2531	23.4393	21.34	17.97	23.4332
26367	T_17	Eragrostis tef	landrace	NA	EBI	NA	NA	M4	Amhara	Misraq Gojjam	Dabretatgen	37.9588	10.5513	3	2681	14.9	13.1	0.75	11.21	24	6.6	17.4	13.6	14.9	16.5	13.6	1357	337	12	98	855	47	211	855	NA	NA	NA	NA	NA	NA	NA	NA	NA	NA	NA	NA	NA	NA	NA
26377	T_16	Eragrostis tef	landrace	NA	EBI	NA	NA	M3	Amhara	Misraq Gojjam	Basoliban	37.8355	10.0705	6	2375	16.5	13.3	0.73	13.21	26.1	7.9	18.2	15	16	18.4	15	1207	309	6	99	752	29	199	752	48.5096	48.5348	48.5081	95.5653	95.7	95.6763	70.239	85.491	51.1023	28.6656	31.407	25.0631	22.0335	22.3584	20.8533
55047	T_52	Eragrostis tef	landrace	NA	EBI	NA	NA	M3	Amhara	Misraq Gojjam	Goncha Siso Enese	37.95	10.9	6	2535	15.9	13.9	0.78	10.07	24.9	7.1	17.8	14.7	15.6	17.2	14.7	1395	361	12	103	903	45	296	903	44.5855	44.714	44.6483	94.6029	94.8039	94.79	70.5761	86.505	51.1023	24.6762	25.5738	19.3798	21.732	21.9444	20.4234
55057	T_41	Eragrostis tef	landrace	NA	EBI	NA	NA	M3	Amhara	Misraq Gojjam	Awabel	38.05	10.2333	3	2417	16.6	13	0.73	13.96	25.9	8.2	17.7	14.9	16	18.5	14.9	1179	313	6	101	745	26	196	745	NA	NA	NA	NA	NA	NA	NA	NA	NA	NA	NA	NA	NA	NA	NA
55090	T_304	Eragrostis tef	landrace	NA	EBI	NA	NA	M3	Oromia	Mirab Shewa	Jeldu	38.05	9.36667	6	2551	15.2	14	0.74	11.08	24.7	6	18.7	14.2	14.5	16.8	14.2	1155	279	8	95	702	30	213	702	44.5855	44.714	44.6483	93.6405	93.9079	93.9038	69.6261	85.491	49.2853	29.5749	37.2403	22.2215	23.3904	24.4284	22.5732
55100	T_287	Eragrostis tef	landrace	NA	EBI	NA	NA	M3	Oromia	Mirab Hararghe	Chiro	40.7667	9.06667	4	1959	18.9	13.6	0.75	11.53	27.9	9.9	18	19.2	17.3	20.3	17.3	1135	196	10	65	527	71	360	71	58.3198	58.0869	58.1575	100.858	101.524	99.6645	71.9859	93.5107	48.3768	31.9802	38.7428	27.4989	25.29	23.4348	29.0228
55291	T_160	Eragrostis tef	landrace	NA	EBI	NA	NA	M3	Amhara	Mirab Gojjam	Adet	37.3833	11.4167	6	2110	17.6	14.7	0.73	10.69	27.4	7.3	20.1	17	16.7	19.2	16.5	1480	409	6	112	1007	26	129	52	47.2833	48.0572	46.5782	96.5277	96.5961	96.5625	74.683	92.4045	57.4618	30.8949	35.0307	27.9048	21.9129	22.0272	20.8533
55311	T_75	Eragrostis tef	landrace	NA	EBI	NA	NA	M3	Amhara	Semen Gondar	Gondar Zuria	37.4833	12.6667	2	2295	18.6	14.1	0.71	14.07	29	9.2	19.8	17.6	18.3	20.8	17.2	1141	327	4	113	785	21	148	745	50.4716	51.4005	49.473	97.4901	97.4921	97.4488	75.8782	92.7733	60.6415	31.0415	35.0307	28.3108	24.5361	21.7788	28.5929
55334	T_12	Eragrostis tef	landrace	NA	EBI	NA	NA	SH3	Amhara	Agew Awi	Dangela	36.9	11.1167	6	2386	15.5	14.6	0.74	8.09	25.2	5.5	19.7	15	15	16.7	14.8	1769	399	15	90	1033	71	225	102	46.057	46.1468	46.0958	97.4901	97.4921	97.4488	71.8021	84.2005	57.0076	27.4629	27.3414	25.4691	21.3099	20.3712	20.8533
55337	T_165	Eragrostis tef	landrace	NA	EBI	NA	NA	M3	Amhara	Mirab Gojjam	Bure Wemberma	37.1167	10.7	4	2013	17.7	14.5	0.72	10.04	27.7	7.8	19.9	16.8	17.2	19.3	16.8	1573	359	9	96	959	40	204	959	52.9242	52.8333	52.8503	97.0089	97.0441	97.0057	82.1917	108.536	63.8213	31.1295	36.6216	27.0929	24.5361	27.5748	22.5732
202435	T_108	Eragrostis tef	landrace	NA	EBI	NA	NA	SM2	Amhara	Semen Wello	Guba Lafto	39.65	12.15	4	1479	22.2	15.8	0.7	16.69	34.5	12.1	22.4	23.2	20.8	24.3	20	804	184	15	83	391	69	221	95	63.225	62.8629	62.9822	104.227	104.661	102.766	79.5867	101.162	63.367	36.2628	46.7855	31.9644	25.7422	24.6768	29.0228
202953	T_270	Eragrostis tef	landrace	NA	EBI	NA	NA	SH3	Oromia	Jimma	Sokoru	37.5	8.08333	5	2034	18.5	15.1	0.77	9.12	28.3	8.7	19.6	17.5	18.2	19.8	17.5	1308	239	15	73	658	58	212	658	46.7928	47.5796	46.0958	97.9713	97.9401	97.8919	65.0288	77.6556	43.3801	27.3162	26.0157	26.281	21.9732	17.6388	25.583
203006	T_244	Eragrostis tef	landrace	NA	EBI	NA	NA	SH3	Oromia	Misraq Wellega	Guto Wayu	36.75	9.16667	5	2513	15.9	13.7	0.82	7.66	24.8	8.1	16.7	14.9	16.3	16.7	14.9	1910	367	18	82	1013	63	203	1011	45.3212	46.1468	44.6483	96.5277	96.5961	96.5625	71.3423	83.2786	56.5533	27.3162	27.7834	24.6572	22.0335	19.8744	23.4332
203028	T_245	Eragrostis tef	landrace	NA	EBI	NA	NA	M3	Oromia	Horo Guduru	Jimma Horo	37.1667	9.33333	6	2233	16.5	14.9	0.76	8.48	26.5	7.1	19.4	15.9	16.5	17.7	15.7	1467	344	9	91	848	40	272	842	49.4906	49.49	49.473	96.0465	96.148	96.1194	69.6261	85.9519	48.8311	28.6362	29.9929	26.281	24.2346	25.9188	23.4332
203034	T_305	Eragrostis tef	landrace	NA	EBI	NA	NA	SH3	Oromia	Mirab Shewa	Bako Tibe	37.1637	9.087	6	1648	19.6	15	0.73	11.73	30	9.6	20.4	18.7	19.7	21.3	18.6	1246	276	13	83	693	53	255	654	58.8104	58.5645	58.64	103.264	103.316	102.323	74.2233	98.3963	50.1938	34.5028	41.4826	31.9644	25.7422	28.4028	25.1531
204594	T_325	Eragrostis tef	landrace	NA	EBI	NA	NA	SH3	Oromia	Mirab Welega	Lalo Asabi	35.7553	9.16733	6	1738	19.9	13.4	0.75	13.38	29.9	12.2	17.7	18.5	20.4	21.9	18.3	1823	362	4	92	1027	20	102	992	44.5855	44.714	44.6483	97.4901	97.4921	97.4488	76.1847	91.3905	62.9128	31.8629	37.9473	27.9048	24.5663	22.2756	28.1629
205151	T_65	Eragrostis tef	landrace	NA	EBI	NA	NA	M3	Amhara	Semen Gondar	Dabat	37.6667	13.1667	5	1664	21.9	15.6	0.72	16.25	33.5	12.1	21.4	20.7	21.5	24.2	20.1	930	280	1	125	685	6	99	654	61.7534	61.4301	61.5348	102.783	103.316	101.437	76.8283	97.0136	59.2788	29.6629	37.9473	21.8155	24.9884	27.9888	23.4332
205217	T_209	Eragrostis tef	landrace	NA	EBI	NA	NA	SH3	Oromia	Misraq Harerge	Kersa	41.6667	9.25	3	2462	13.4	12.7	0.81	7.05	21.2	5.7	15.5	13.2	12.5	14.3	12.5	1103	248	9	74	549	62	329	62	46.5475	46.6244	46.5782	96.5277	96.5961	96.5625	67.2049	71.7561	55.6448	25.9669	24.1597	24.2512	20.2847	17.556	20.8533
206841	T_78	Eragrostis tef	landrace	NA	EBI	NA	NA	NA	NA	NA	Dabat	NA	NA	3	NA	NA	NA	NA	NA	NA	NA	NA	NA	NA	NA	NA	NA	NA	NA	NA	NA	NA	NA	NA	NA	NA	NA	NA	NA	NA	NA	NA	NA	NA	NA	NA	NA	NA	NA
212481	T_96	Eragrostis tef	landrace	NA	EBI	NA	NA	M3	Amhara	North Shewa	Siyadebrina Wayu Ens	38.9167	9.81667	4	2179	17.6	13.4	0.73	13.9	27	8.8	18.2	16.1	16.6	19.4	16.1	928	278	5	103	587	26	171	587	46.7928	47.102	46.5782	96.5277	96.5961	96.5625	84.9501	93.7872	86.5337	33.3882	37.5938	32.4515	23.2698	23.352	23.3472
212487	T_92	Eragrostis tef	landrace	NA	EBI	NA	NA	M3	Amhara	North Shewa	Lay Betna Tach Bet	39	10.0833	3	1805	19.6	13.6	0.75	14.22	29	11	18	17.9	18.8	21.4	17.9	889	248	6	98	551	30	164	551	49.9811	50.9228	48.9906	97.4901	97.4921	97.4488	77.8704	101.07	58.3703	31.9215	39.4498	26.687	24.8678	24.7596	26.443
212488	T_91	Eragrostis tef	landrace	NA	EBI	NA	NA	SM2	Amhara	North Shewa	Weremo Wajetuna Mid	39	10.2333	4	1649	20.4	13.9	0.74	13.78	29.8	11.2	18.6	19.1	19.2	22.2	19.1	865	232	6	97	537	31	156	537	60.7724	62.3853	58.64	110.482	110.485	108.527	76.2767	93.0498	61.55	29.6629	31.7606	27.4989	20.4656	19.2948	19.5634
212591	T_141	Eragrostis tef	landrace	NA	EBI	NA	NA	M4	Amhara	Debub Wollo	Were Ilu	39.5	10.8833	3	3207	11.6	14.6	0.74	11.86	21.1	1.4	19.7	12.2	10	13	10	1182	331	13	106	775	47	210	47	44.095	44.2364	44.1659	94.6029	94.8039	94.79	74.3765	92.8654	56.0991	28.7829	29.9929	26.687	23.0285	22.6068	23.4332
212601	T_143	Eragrostis tef	landrace	NA	EBI	NA	NA	M4	Amhara	Debub Wollo	Tenta	39.25	11.1667	3	2532	15.2	15.3	0.75	11.7	24.9	4.6	20.3	15.7	13.6	16.5	13.5	1086	294	16	103	706	54	190	75	44.8307	45.1916	44.6483	95.5653	95.7	95.6763	65.9789	74.0606	49.7396	25.9376	25.839	22.6274	21.0686	19.7088	20.8533
212604	T_147	Eragrostis tef	landrace	NA	EBI	NA	NA	M3	Amhara	Debub Wollo	Werebabu	39.7333	11.3667	2	2112	17.4	15.1	0.71	14.29	28.1	7	21.1	18.6	15.8	19.1	15.4	1100	257	25	85	621	93	342	95	49.0001	49.0124	48.9906	96.0465	96.148	96.1194	76.6751	100.701	55.1906	32.1562	41.9245	25.0631	21.8224	21.7788	20.8533
212606	T_148	Eragrostis tef	landrace	NA	EBI	NA	NA	WB	Amhara	Debub Wollo	Werebabu	39.7167	11.35	4	1911	18.8	14.9	0.71	14.36	29.7	8.9	20.8	19.9	17.3	20.7	16.8	1072	248	24	83	595	92	330	98	48.7548	49.0124	48.5081	94.6029	94.8039	94.79	79.9238	100.793	64.7298	31.4815	37.2403	27.4989	24.8377	24.6768	26.443
212607	T_144	Eragrostis tef	landrace	NA	EBI	NA	NA	M3	Amhara	Debub Wollo	Tehuledere	39.6833	11.3167	3	1962	18.5	14.9	0.71	14.36	29.2	8.4	20.8	19.5	16.9	20.3	16.5	1099	254	24	84	616	96	338	101	45.8117	46.1468	45.6133	97.4901	97.4921	97.4488	83.1112	108.075	67.001	31.2469	34.7656	29.1227	21.5511	19.7916	22.1433
212610	T_131	Eragrostis tef	landrace	NA	EBI	NA	NA	M3	Amhara	Debub Wollo	Ambasel	39.4	11.4667	3	2373	16.1	15.7	0.74	12.8	26.4	5.3	21.1	17.1	14.3	17.6	14.3	992	269	16	100	621	64	556	64	46.5475	47.5796	45.6133	94.1217	94.3559	94.3469	81.4868	107.799	62.4585	31.8042	39.9801	25.8751	26.7976	29.6448	26.873
212715	T_121	Eragrostis tef	landrace	NA	EBI	NA	NA	M3	Amhara	Debub Gondar	Fogera	37.8	11.9833	5	1824	20.3	15.5	0.76	10.94	30.6	10.4	20.2	19.2	20.6	22	19.2	1068	344	2	130	794	9	68	794	41.1519	41.3708	41.2711	84.979	85.8434	85.9274	67.2968	71.1108	56.5533	26.1722	25.2203	23.8453	20.4053	17.4732	21.2833
212719	T_128	Eragrostis tef	landrace	NA	EBI	NA	NA	M4	Amhara	Debub Gondar	Lay Gayint	38.3167	11.7167	3	2957	13	15.2	0.76	10.25	23	3.2	19.8	12.4	12.9	14.3	11.7	1348	398	10	116	929	35	256	97	43.8497	44.2364	43.6834	93.1593	93.4599	93.4606	70.0858	77.6556	58.3703	26.6709	28.0485	22.6274	23.119	24.9252	21.2833
212720	T_129	Eragrostis tef	landrace	NA	EBI	NA	NA	M4	Amhara	Debub Gondar	Lay Gayint	38.3	11.7	3	2920	13.3	15.2	0.76	10.64	23.4	3.5	19.9	12.6	13.2	14.6	12	1361	400	10	116	938	34	259	100	46.7928	47.5796	46.0958	110.482	109.589	109.413	72.4763	91.2984	52.0108	25.4096	22.9223	23.8453	23.5411	24.4284	23.0032
212834	T_196	Eragrostis tef	landrace	NA	EBI	NA	NA	M2	Oromia	Bale	Mennana Herena Bulu	39.7833	6.25	3	1078	22.9	14.2	0.75	7.3	32.4	13.5	18.9	23.7	22.6	23.8	21.9	671	150	8	86	343	35	222	157	42.6234	42.8036	42.7185	93.6405	93.9079	93.9038	67.6952	81.5272	47.4683	26.8762	28.2253	23.0334	21.34	19.626	21.7133
212922	T_336	Eragrostis tef	landrace	NA	EBI	NA	NA	SH3	SNNP	Hadiya	Konteb	37.8667	7.61667	3	2332	16.3	14.6	0.76	8.68	26.2	7	19.2	15.4	16.1	17.6	15.4	1073	175	20	60	479	60	246	438	45.076	45.1916	45.1308	95.5653	95.7	95.6763	69.8712	77.9322	57.4618	27.9029	22.0385	31.5584	24.2346	25.9188	23.4332
212930	T_342	Eragrostis tef	landrace	NA	EBI	NA	NA	SH3	SNNP	Gamo Gofa	Bonke	37.25	5.91667	3	1760	19.9	11.7	0.76	10.03	28.4	13.1	15.3	20.5	20.7	21.2	18.5	1225	184	24	49	456	102	183	291	63.225	62.8629	62.9822	102.302	102.868	100.994	77.9317	98.4885	61.0958	33.2709	41.7477	28.3108	27.883	33.8675	25.583
215676	T_135	Eragrostis tef	landrace	NA	EBI	NA	NA	M3	Amhara	Debub Wollo	Werebabu	39.75	11.3333	4	2102	17.8	15	0.72	14.34	28.5	7.7	20.8	19	16.2	19.6	15.9	1102	255	24	84	619	94	340	97	NA	NA	NA	NA	NA	NA	NA	NA	NA	NA	NA	NA	NA	NA	NA
222088	T_331	Eragrostis tef	landrace	NA	EBI	NA	NA	SH4	SNNP	Gurage	Meskanena Mareko	38.3333	8.16667	2	2362	16	13.7	0.77	8.36	24.7	7	17.7	15.2	15.4	17.3	15.2	1065	191	10	70	530	50	285	530	58.3198	58.0869	58.1575	100.377	100.628	99.6645	81.4562	108.628	61.55	34.9135	45.3714	29.5287	23.511	25.5876	21.7133
222144	T_306	Eragrostis tef	landrace	NA	EBI	NA	NA	SH2	Oromia	Mirab Shewa	Bako Tibe	37.1667	9	5	1602	20.1	15.1	0.73	11.68	30.5	10	20.5	19.2	20.1	21.7	19	1255	274	13	82	694	55	157	652	44.5855	44.714	44.6483	97.4901	97.4921	97.4488	67.4807	66.133	62.0043	24.7056	23.4526	21.4095	19.8625	19.7088	17.4136
223149	T_400	Eragrostis tef	landrace	NA	EBI	NA	NA	SM3	Tigray	Misraqawi	Saesi Tsaedaemba	39.25	13.8	1	1943	21.5	16.1	0.72	15.03	32.3	10	22.3	21.4	19.9	23.6	19.9	645	204	13	117	439	42	120	42	48.5096	49.0124	48.0256	99.8961	99.7322	99.6645	66.408	75.3511	49.7396	25.5562	26.0157	21.4095	20.3751	20.5368	18.0155
223152	T_414	Eragrostis tef	landrace	NA	EBI	NA	NA	SM4	Tigray	Debubawi	Alaje	39.5097	12.9387	1	2463	16.5	16.1	0.7	15.95	28.3	5.5	22.8	17.2	14.6	18.5	14.6	640	204	5	121	440	22	237	22	47.5285	47.5796	47.5432	97.0089	97.0441	97.0057	67.4807	83.1865	45.1971	26.4362	30.4348	19.7857	21.5209	22.1928	19.5634
223293	T_288	Eragrostis tef	landrace	NA	EBI	NA	NA	H3	Oromia	Mirab Hararghe	Guba Koricha	40.25	8.66667	3	2351	17	13.8	0.78	9.71	25.7	8.1	17.6	17.3	15.6	18.1	15.6	1145	210	9	66	558	69	337	69	46.5475	46.6244	46.5782	96.5277	96.5961	96.5625	75.2959	93.3263	58.3703	30.6895	34.412	27.9048	21.0686	20.9508	19.5634
225753	T_344	Eragrostis tef	landrace	NA	EBI	NA	NA	SH3	SNNP	Gamo Gofa	Bonke	37.3333	5.91667	3	1944	19	12	0.76	9.65	27.7	12.1	15.6	19.6	19.8	20.3	17.7	1333	212	25	51	506	104	195	323	45.5665	45.6692	45.6133	97.9713	97.9401	97.8919	68.7066	79.4992	52.4651	25.1162	26.8995	19.3798	22.4255	22.1928	22.1433
225760	T_345	Eragrostis tef	landrace	NA	EBI	NA	NA	SH2	SNNP	Gamo Gofa	Kucha	37.5	6.46667	5	1372	22.2	13.2	0.77	8.85	31.3	14.3	17	22.1	22.7	23.3	21	1034	142	16	47	369	76	135	327	46.057	46.1468	46.0958	98.9337	98.8362	98.7782	74.8362	90.5609	59.7331	31.1882	34.5888	29.1227	22.727	22.6068	22.5732
225766	T_330	Eragrostis tef	landrace	NA	EBI	NA	NA	SM3	SNNP	Gedeo	Wenago	38.2333	6.3	5	1881	17.9	14.3	0.74	6.35	27.1	7.9	19.2	18.2	17.6	18.8	17.1	1649	263	17	61	654	95	425	138	63.225	62.8629	62.9822	99.8961	100.628	98.7782	80.9352	105.679	62.9128	30.3962	39.273	22.6274	26.4659	28.734	26.873
225905	T_140	Eragrostis tef	landrace	NA	EBI	NA	NA	SM3	Amhara	Debub Wollo	Kelala	38.8833	10.7	3	2468	15.7	14	0.75	11.4	24.9	6.4	18.5	15	14.6	17.3	14.4	1099	307	11	107	730	39	210	68	45.5665	45.6692	45.6133	93.6405	93.9079	93.9038	67.9098	76.1807	53.3736	26.8469	26.3692	24.6572	20.6767	20.2884	19.1335
225912	T_142	Eragrostis tef	landrace	NA	EBI	NA	NA	SM3	Amhara	Debub Wollo	Legambo	38.8833	10.7667	3	2546	15.3	14.2	0.75	10.84	24.5	5.8	18.7	14.8	14.2	16.8	14	1120	311	11	107	747	40	211	69	48.5096	48.5348	48.5081	100.377	100.18	100.108	71.4956	83.2786	57.0076	28.9296	29.551	27.4989	23.3602	23.5176	23.4332
225921	T_122	Eragrostis tef	landrace	NA	EBI	NA	NA	M3	Amhara	Debub Gondar	Este	38.1167	11.6167	3	2541	15.8	15.6	0.76	11.94	26.5	6.1	20.4	14.6	15.9	17.2	14.5	1399	405	9	118	975	30	147	643	45.076	45.1916	45.1308	97.4901	97.4921	97.4488	71.7714	86.4128	54.7363	29.3695	31.7606	26.687	22.727	22.1928	23.0032
225922	T_127	Eragrostis tef	landrace	NA	EBI	NA	NA	M4	Amhara	Debub Gondar	Este	38.1833	11.6	6	3027	12.6	14.9	0.76	10.46	22.4	2.9	19.5	11.9	12.5	13.9	11.3	1442	412	12	112	975	40	281	112	46.3023	47.102	45.6133	92.6781	93.0118	93.0175	71.0359	83.2786	55.6448	27.3456	26.546	25.8751	22.3953	20.868	23.4332
225937	T_153	Eragrostis tef	landrace	NA	EBI	NA	NA	M3	Amhara	Mirab Gojjam	Bahir Dar Zuria	37.4333	11.5333	3	1760	19.8	14.6	0.69	13.48	29.8	8.7	21.1	19.2	18.2	21.7	18.2	1401	420	3	122	1001	11	108	29	45.8117	46.1468	45.6133	92.1969	92.5638	92.5744	74.3765	93.7872	55.1906	29.5455	32.7328	26.281	22.124	23.8488	19.5634
228668	T_308	Eragrostis tef	landrace	NA	EBI	NA	NA	M3	Oromia	Mirab Shewa	Cheliya	37.5	9	3	2306	16.4	14.9	0.78	8.91	26.1	7	19.1	15.7	16.2	17.6	15.5	1291	285	9	86	724	41	258	724	46.3023	46.6244	46.0958	96.0465	96.148	96.1194	73.3958	92.2202	53.8278	29.5749	32.8211	26.281	23.6316	22.6068	25.1531
228671	T_310	Eragrostis tef	landrace	NA	EBI	NA	NA	M3	Oromia	Mirab Shewa	Ambo	37.85	8.98333	5	2107	18	14.8	0.78	10.69	27.5	8.6	18.9	17.1	17.5	19.4	16.8	1012	218	8	85	583	37	156	559	45.5665	45.6692	45.6133	96.5277	96.5961	96.5625	80.598	98.2119	69.2723	30.3962	35.2958	26.281	24.6869	23.8488	26.873
229092	T_94	Eragrostis tef	landrace	NA	EBI	NA	NA	M3	Amhara	North Shewa	Siyadebrina Wayu Ens	38.9167	9.81667	4	2179	17.6	13.4	0.73	13.9	27	8.8	18.2	16.1	16.6	19.4	16.1	928	278	5	103	587	26	171	587	43.8497	43.7588	44.1659	94.1217	94.3559	94.3469	80.8126	100.701	67.4553	32.4495	40.1569	27.4989	24.2648	25.5876	23.8632
229095	T_89	Eragrostis tef	landrace	NA	EBI	NA	NA	M2	Amhara	North Shewa	Siyadebrina Wayu Ens	38.9	9.9	4	1481	21.3	14.3	0.74	14.6	31	11.7	19.3	20.7	20.1	23.3	19.9	839	227	6	100	519	27	153	516	44.5855	44.714	44.6483	95.5653	95.7	95.6763	77.8704	97.8432	61.55	32.0095	41.0407	25.4691	22.8175	24.9252	20.4234
229130	T_102	Eragrostis tef	landrace	NA	EBI	NA	NA	NA	NA	NA	Lay Betna Tach Bet	NA	NA	6	NA	NA	NA	NA	NA	NA	NA	NA	NA	NA	NA	NA	NA	NA	NA	NA	NA	NA	NA	NA	NA	NA	NA	NA	NA	NA	NA	NA	NA	NA	NA	NA	NA	NA	NA
229758	T_45	Eragrostis tef	landrace	NA	EBI	NA	NA	NA	NA	NA	Goncha Siso Enese	NA	NA	4	NA	NA	NA	NA	NA	NA	NA	NA	NA	NA	NA	NA	NA	NA	NA	NA	NA	NA	NA	NA	NA	NA	NA	NA	NA	NA	NA	NA	NA	NA	NA	NA	NA	NA	NA
229768	T_51	Eragrostis tef	landrace	NA	EBI	NA	NA	M3	Amhara	Misraq Gojjam	Debay Telatgen	38.1833	10.5833	6	2490	16.1	13.4	0.75	11.94	25.3	7.6	17.7	14.7	16	17.7	14.7	1229	328	8	104	798	35	188	798	NA	NA	NA	NA	NA	NA	NA	NA	NA	NA	NA	NA	NA	NA	NA
232239	T_181	Eragrostis tef	landrace	NA	EBI	NA	NA	A2	Oromia	Arsi	Merti	39.7667	8.61667	1	1168	23.9	15.1	0.7	17.73	34.2	12.8	21.4	24.8	21.3	25.8	21.3	618	140	3	82	340	29	149	29	44.8307	44.714	45.1308	89.3098	89.8756	89.9156	74.1313	89.8235	58.3703	28.4896	31.3186	24.6572	22.4255	22.1928	22.1433
234362	T_402	Eragrostis tef	landrace	NA	EBI	NA	NA	SM4	Tigray	Misraqawi	Ganta Afeshum	39.4167	14.25	1	2792	12.8	15.1	0.72	15.08	22.8	1.9	20.9	13.8	11.2	14.8	10.7	584	173	3	113	380	13	142	19	45.5665	45.6692	45.6133	92.6781	93.0118	93.0175	63.8029	65.6721	51.5566	23.7963	18.9451	23.0334	22.2446	21.696	22.1433
234376	T_379	Eragrostis tef	landrace	NA	EBI	NA	NA	SM2	Tigray	Mehakelegnaw	Mereb Lehe	38.7833	14.4167	1	1396	23.3	16.6	0.71	17.56	34.9	11.6	23.3	23.1	21.7	25.8	21.4	668	181	15	103	423	50	129	52	61.7534	61.4301	61.5348	96.5277	97.4921	95.6763	79.035	104.572	58.3703	33.6522	44.6644	26.687	25.8327	26.1672	27.7329
234404	T_381	Eragrostis tef	landrace	NA	EBI	NA	NA	SM3	Tigray	Mehakelegnaw	Adwa	38.8833	14.1	1	1876	20.1	16.2	0.69	16.19	31.4	8.1	23.3	19.9	18.5	22.4	18.4	669	210	3	128	486	12	69	19	49.0001	49.49	48.5081	99.4149	99.2842	99.2213	68.0937	77.6556	52.4651	27.6389	30.0813	23.4393	22.2446	22.11	21.7133
234409	T_382	Eragrostis tef	landrace	NA	EBI	NA	NA	SM3	Tigray	Mehakelegnaw	Werie Lehe	38.95	14.1	1	1973	19.1	16	0.69	15.55	30.2	7.1	23.1	18.6	17.3	21.3	17.3	650	202	2	126	470	9	75	9	46.057	46.6244	45.6133	99.4149	99.2842	99.2213	75.0814	91.2984	59.7331	31.2175	38.2125	25.8751	23.6617	26.0016	21.7133
234418	T_433	Eragrostis tef	landrace	NA	EBI	NA	NA	SM3	Tigray	Mehakelegnaw	Asegede Tsimbela	38.5833	14.1	6	2252	17.6	15.7	0.7	14.82	28.6	6.4	22.2	17.2	16.4	19.7	16.1	714	246	1	135	542	4	144	14	46.057	46.6244	45.6133	92.1969	92.5638	92.5744	75.4492	98.3963	53.8278	30.1029	36.1797	24.6572	23.9029	25.008	23.4332
234448	T_434	Eragrostis tef	landrace	NA	EBI	NA	NA	SM3	Tigray	Semien Mi'irabaw	Medebay Zana	38.4667	14.1167	1	1990	19.5	15.9	0.7	16.23	30.8	8.3	22.5	18.8	18.3	21.8	18	788	263	1	135	600	4	158	16	45.5665	45.6692	45.6133	91.2345	91.6678	91.6881	74.9895	97.0136	53.8278	30.6895	38.8311	23.8453	22.8778	22.6068	23.0032
234471	T_383	Eragrostis tef	landrace	NA	EBI	NA	NA	SM3	Tigray	Mehakelegnaw	Enticho	38.6167	14.25	1	1708	21.3	16.4	0.7	17.66	33	9.6	23.4	20.8	19.9	23.8	19.7	732	231	3	128	540	11	68	21	45.5665	45.6692	45.6133	92.1969	92.5638	92.5744	72.4763	92.6811	50.6481	29.2229	35.7378	22.6274	23.8125	24.3456	23.8632
234742	T_50	Eragrostis tef	landrace	NA	EBI	NA	NA	M3	Amhara	Misraq Gojjam	Enemay	38.1833	10.4833	6	2526	15.9	13.2	0.74	12.54	25.1	7.4	17.7	14.4	15.3	17.6	14.4	1220	324	8	103	786	34	194	786	44.5855	44.714	44.6483	94.6029	94.8039	94.79	73.4571	78.1165	67.9095	26.5829	25.5738	24.6572	20.6164	19.2948	19.9934
234751	T_146	Eragrostis tef	landrace	NA	EBI	NA	NA	SM3	Amhara	Semen Wello	Were Ilu	39.1	11.5333	3	2927	13	15.5	0.76	11.08	22.8	2.6	20.2	13.5	11.7	14.3	11.4	1059	328	10	116	727	35	184	57	45.5665	45.6692	45.6133	91.7157	92.1158	92.1312	75.1427	87.3346	63.8213	29.6629	29.9929	29.1227	24.0839	23.0208	26.013
234754	T_113	Eragrostis tef	landrace	NA	EBI	NA	NA	SM4	Amhara	Semen Wello	Bugna	38.95	11.6667	3	2969	12.7	15.5	0.77	10.78	22.4	2.4	20	13	11.5	14	11.1	1079	341	8	120	752	32	189	57	43.6044	43.7588	43.6834	91.7157	92.1158	92.1312	69.9325	79.4992	56.0991	27.1696	29.1091	23.0334	20.7973	18.9636	20.8533
234759	T_133	Eragrostis tef	landrace	NA	EBI	NA	NA	SM3	Amhara	Debub Wollo	Tenta	39.2833	11.4667	3	1990	18.2	15.4	0.74	12.62	28.6	7.8	20.8	19.1	16.4	19.7	16.4	1004	260	20	94	607	77	350	77	54.8862	54.7437	54.7802	99.8961	99.7322	99.6645	78.8205	107.614	54.7363	30.1615	35.4726	25.4691	24.2949	23.6004	26.013
234761	T_139	Eragrostis tef	landrace	NA	EBI	NA	NA	SM3	Amhara	Debub Wollo	Mekdela	39.3	11.4167	3	2286	16.6	15.5	0.74	12.39	26.8	6	20.8	17.5	14.9	18	14.9	1009	271	17	99	634	67	363	67	47.5285	47.5796	47.5432	98.4525	98.3882	98.3351	67.6339	80.8819	47.9226	25.9962	25.5738	23.0334	20.4354	17.556	21.2833
234790	T_56	Eragrostis tef	landrace	NA	EBI	NA	NA	M2	Amhara	Semen Gondar	Gondar Zuria	37.3833	12.8333	5	1406	23.4	15.5	0.75	14.51	34.5	13.9	20.6	22.1	23.2	25.5	21.7	967	278	1	122	702	5	97	670	63.225	64.7733	61.0523	109.039	109.141	107.198	84.0306	114.989	62.9128	34.5028	46.3436	27.4989	23.7823	21.3648	26.873
234949	T_339	Eragrostis tef	landrace	NA	EBI	NA	NA	H3	SNNP	Sheka	Masha Anderacha	35.4167	7.58333	5	1893	18.5	12.8	0.85	7.82	26.8	11.8	15	17.5	19.1	19.4	17.5	1772	262	37	58	760	126	283	744	44.5855	44.714	44.6483	95.5653	95.7	95.6763	70.1164	85.5832	50.6481	28.0496	29.551	25.0631	24.3552	23.352	26.443
235302	T_70	Eragrostis tef	landrace	NA	EBI	NA	NA	M3	Amhara	Semen Gondar	Chilga	37.0833	12.5833	3	2197	17.7	12.8	0.71	13.73	27.8	9.9	17.9	16.4	17.8	19.6	16	1207	332	4	112	833	17	139	786	46.5475	47.5796	45.6133	95.5653	95.7	95.6763	74.2233	89.1782	59.2788	29.8095	33.0863	26.687	24.0839	25.5048	23.4332
235303	T_54	Eragrostis tef	landrace	NA	EBI	NA	NA	M3	Amhara	Semen Gondar	Chilga	37.1	12.6	3	2098	18.5	13	0.73	13.65	28.4	10.6	17.8	17	18.6	20.3	16.7	1179	325	3	113	819	16	135	770	44.5855	44.714	44.6483	94.6029	94.8039	94.79	68.2162	79.868	50.6481	26.7296	27.7834	23.0334	20.3148	19.2948	19.1335
235317	T_415	Eragrostis tef	landrace	NA	EBI	NA	NA	SM4	Tigray	Debubawi	Rayaazebo	39.5333	12.9333	1	2459	16.6	16.1	0.7	16.46	28.5	5.6	22.9	17.3	14.7	18.7	14.6	642	203	5	120	439	23	236	32	45.076	45.1916	45.1308	91.7157	92.1158	92.1312	69.9325	86.4128	49.2853	27.3162	29.9929	22.6274	20.6767	19.8744	19.5634
235323	T_416	Eragrostis tef	landrace	NA	EBI	NA	NA	SM2	Tigray	Mehakelegnaw	Mekele	39	13.5167	1	1606	23.2	16.7	0.73	16.02	34.6	11.8	22.8	22.6	22.2	25.4	21.8	678	237	6	133	511	26	79	479	45.5665	45.6692	45.6133	96.0465	96.148	96.1194	61.6576	62.9067	47.9226	24.3829	23.3643	20.5976	21.9732	19.7088	23.4332
235326	T_404	Eragrostis tef	landrace	NA	EBI	NA	NA	SM3	Tigray	Debubawi	Wukro	39.5	13.55	3	2080	19	15.2	0.72	14.64	29.1	8	21.1	19.7	17	20.9	17	585	199	6	132	422	19	106	19	44.3402	44.714	44.1659	96.5277	96.5961	96.5625	66.929	78.7618	47.9226	25.9962	26.4576	22.2215	19.1389	19.3776	15.6937
235659	T_328	Eragrostis tef	landrace	NA	EBI	NA	NA	SH2	SNNP	Gamo Gofa	Dirashe Special	37.5333	5.98333	5	1259	22.1	12	0.77	7.13	30.3	14.9	15.4	22.7	22.5	23.1	21.2	800	128	23	52	315	77	220	153	44.095	44.2364	44.1659	91.7157	92.1158	92.1312	71.9553	88.8095	52.9193	28.9882	33.2631	24.2512	21.9431	20.868	22.1433
235850	T_73	Eragrostis tef	landrace	NA	EBI	NA	NA	M3	Amhara	Semen Gondar	Lay Armacho	37.6333	12.4667	2	2655	15.1	14.2	0.72	12.18	25.1	5.6	19.5	14.5	14.8	16.9	14	1229	359	6	115	847	22	146	95	46.3023	47.102	45.6133	95.5653	95.7	95.6763	78.2075	90.5609	69.7265	33.7695	41.0407	30.3406	24.0839	25.9188	23.0032
236084	T_347	Eragrostis tef	landrace	NA	EBI	NA	NA	SH3	SNNP	Wolayita	Sodo Zuria	37.7558	6.85717	5	2024	19.5	14.1	0.8	13.79	29.4	11.8	17.6	17.4	20.4	20.9	17.4	1485	225	23	54	595	112	199	595	38.6993	38.9828	38.8587	84.979	85.8434	85.9274	63.9255	66.9627	50.6481	24.8229	22.9223	22.2215	20.737	18.384	21.2833
236088	T_348	Eragrostis tef	landrace	NA	EBI	NA	NA	SH2	SNNP	Wolayita	Humbo	37.8833	6.7	2	1396	21.9	14.3	0.78	9.39	31.8	13.5	18.3	21.3	22.6	23.1	20.6	975	138	15	50	367	72	136	362	46.3023	47.102	45.6133	94.6029	94.8039	94.79	74.8362	90.5609	59.7331	30.6602	35.6494	26.687	23.5411	24.8424	22.5732
236090	T_350	Eragrostis tef	landrace	NA	EBI	NA	NA	SH3	SNNP	Wolayita	Sodo Zuria	37.7432	6.8265	3	1869	20.1	14.3	0.8	14.19	30.2	12.4	17.8	18	21.3	21.5	18	1373	211	23	53	550	101	173	550	37.473	37.55	37.8938	82.8136	84.0513	83.7118	60.7381	61.524	46.5599	25.0869	23.7178	22.2215	22.0938	22.524	20.8533
236097	T_203	Eragrostis tef	landrace	NA	EBI	NA	NA	M2	Oromia	Guji	Liben	39.5732	5.3335	4	1484	19.1	13	0.75	9.2	28.4	11.1	17.3	19.4	18.1	20.4	18.1	687	193	7	110	382	29	65	29	48.5096	48.5348	48.5081	95.5653	95.7	95.6763	80.1996	101.162	65.184	30.6895	36.6216	25.8751	21.2194	19.7088	21.2833
236262	T_219	Eragrostis tef	landrace	NA	EBI	NA	NA	SM2	Oromia	Misraq Shewa	Boset	39.4262	8.66	4	1459	21.7	14.6	0.72	15.28	31.5	11.4	20.1	21.7	19.6	23.6	19.6	749	185	5	94	457	29	171	29	46.057	46.6244	45.6133	97.4901	97.4921	97.4488	74.4991	91.3905	57.9161	29.8095	33.5282	26.281	22.4858	22.7724	21.7133
236318	T_246	Eragrostis tef	landrace	NA	EBI	NA	NA	M3	Oromia	Horo Guduru	Jimma Horo	37.1667	9.33333	6	2233	16.5	14.9	0.76	8.48	26.5	7.1	19.4	15.9	16.5	17.7	15.7	1467	344	9	91	848	40	272	842	44.5855	44.714	44.6483	94.6029	94.8039	94.79	69.1663	84.5692	48.8311	25.5562	28.2253	19.3798	21.8224	21.3648	21.2833
236320	T_247	Eragrostis tef	landrace	NA	EBI	NA	NA	M2	Oromia	Horo Guduru	Guduru	37.45	9.9	6	1380	21.3	15	0.72	13.81	32	11.4	20.6	20.4	21.1	23.3	19.9	1096	283	3	102	692	16	170	679	45.076	45.1916	45.1308	94.6029	94.8039	94.79	70.3003	82.449	54.2821	27.2282	29.2859	23.0334	21.1289	19.0464	21.7133
236353	T_248	Eragrostis tef	landrace	NA	EBI	NA	NA	SH3	Oromia	Misraq Wellega	Guto Wayu	36.55	9.08333	5	2064	17.7	13	0.78	12.59	27.1	10.5	16.6	16.1	18.4	19.3	16	1994	393	9	85	1100	43	162	1037	42.6234	42.8036	42.7185	94.6029	94.8039	94.79	72.936	87.6111	57.0076	30.2202	32.1141	28.7167	21.4606	19.9572	21.7133
236355	T_249	Eragrostis tef	landrace	NA	EBI	NA	NA	SH3	Oromia	Misraq Wellega	Sasiga	36.4932	9.16	6	1758	19.2	13.4	0.73	13.67	29.2	10.9	18.3	17.7	19.5	21.1	17.5	1758	353	8	88	989	33	124	940	44.3402	44.714	44.1659	95.5653	95.7	95.6763	74.4991	84.9379	64.2755	28.9589	30.0813	27.0929	22.4255	20.9508	23.4332
236367	T_250	Eragrostis tef	landrace	NA	EBI	NA	NA	SH3	Oromia	Misraq Wellega	Diga Leka	36.5	8.83333	6	2114	18	13.6	0.79	10.58	27.4	10.2	17.2	16.7	18.5	19.4	16.6	1964	365	13	82	1042	50	187	999	44.5855	44.714	44.6483	94.1217	94.3559	94.3469	70.2084	82.6334	53.8278	29.7509	32.9095	26.687	22.5762	22.1928	22.5732
236512	T_435	Eragrostis tef	landrace	NA	EBI	NA	NA	SM3	Tigray	Semien Mi'irabaw	Asegede Tsimbela	38.2833	14.1	1	1903	20.4	15.8	0.7	17.3	32	9.7	22.3	19.4	19.5	22.8	18.7	903	296	0	134	689	3	188	680	44.095	44.2364	44.1659	94.6029	94.8039	94.79	70.7907	85.3066	52.9193	29.9855	35.3842	25.0631	22.4858	23.6004	20.8533
236519	T_117	Eragrostis tef	landrace	NA	EBI	NA	NA	M3	Amhara	Debub Gondar	Kemekem	37.7	12.3	4	2727	14.6	14.5	0.73	11.8	24.5	4.9	19.6	14	14.4	16.3	13.4	1317	383	7	116	906	25	148	105	52.1884	54.7437	49.473	98.4525	98.3882	98.3351	85.1952	109.735	71.5435	34.3268	44.9295	28.3108	26.0136	27.906	26.443
236535	T_276	Eragrostis tef	landrace	NA	EBI	NA	NA	M4	Oromia	North Shewa	Degem	38.6598	9.65983	3	2724	13.7	13.6	0.7	13.33	23.7	4.5	19.2	12.7	12.5	15.5	12.4	1112	296	6	104	717	28	206	39	46.057	46.1468	46.0958	114.813	113.621	113.402	67.1129	78.854	48.3768	27.4629	26.8995	25.8751	22.4255	20.1228	24.2931
236536	T_103	Eragrostis tef	landrace	NA	EBI	NA	NA	SM3	Amhara	North Shewa	Moretna Jiru	39.32	10.1003	2	1636	20.5	13.8	0.73	13.17	29.8	11.1	18.7	19.6	19.2	22.4	19.2	914	226	10	86	523	47	225	47	45.076	45.6692	44.6483	94.6029	94.8039	94.79	72.5376	91.9436	51.5566	27.7562	30.4348	23.4393	20.4656	19.2948	19.5634
236541	T_277	Eragrostis tef	landrace	NA	EBI	NA	NA	M2	Oromia	North Shewa	Yaya Gulelena D/Liba	38.1333	9.68333	3	1767	19.7	14.7	0.74	16.04	30.1	10.4	19.7	18.4	19.2	21.8	17.7	950	263	2	105	617	19	163	599	43.6044	43.7588	43.6834	85.9414	86.7395	86.8137	69.7793	84.5692	50.6481	28.7829	29.9929	26.687	23.9331	23.4348	25.1531
236739	T_93	Eragrostis tef	landrace	NA	EBI	NA	NA	M3	Amhara	North Shewa	Mafudmezezo Mojana	39.8167	9.9	3	1871	19.3	13.6	0.69	13.81	29.1	9.5	19.6	19.2	17.5	21.2	17.5	1043	254	13	79	556	66	270	66	61.7534	61.4301	61.5348	112.407	112.277	110.3	76.9816	100.701	56.0991	30.8362	38.8311	24.2512	26.7976	30.0587	26.443
236745	T_278	Eragrostis tef	landrace	NA	EBI	NA	NA	M4	Oromia	North Shewa	Yaya Gulelena D/Liba	39.0333	9.66667	3	2596	14.9	13.2	0.71	12.58	24.1	5.7	18.4	14.4	13.4	16.6	13.4	974	301	5	106	631	28	203	28	44.5855	44.714	44.6483	92.1969	92.5638	92.5744	76.3686	95.6309	59.2788	30.5429	35.7378	26.281	23.9331	28.4028	19.9934
236746	T_279	Eragrostis tef	landrace	NA	EBI	NA	NA	M4	Oromia	North Shewa	Yaya Gulelena D/Liba	38.8667	9.6	3	2645	14.4	13.4	0.71	13.03	24	5.3	18.7	13.6	13	16.2	13	1034	296	5	103	667	28	189	28	42.6234	42.8036	42.7185	87.8662	88.5316	88.5862	68.7066	78.5774	53.3736	24.9696	24.69	21.0036	21.8224	19.7088	23.0032
236747	T_280	Eragrostis tef	landrace	NA	EBI	NA	NA	M4	Oromia	North Shewa	Hidabu Abote	38.6333	9.75	2	3213	10.9	13.2	0.72	11.45	20.3	2	18.3	10.4	9.8	12.5	9.7	1268	343	10	102	811	42	229	62	45.5665	45.6692	45.6133	94.6029	94.8039	94.79	80.6593	103.005	64.7298	33.1829	41.9245	27.9048	27.4006	29.6448	28.5929
236752	T_311	Eragrostis tef	landrace	NA	EBI	NA	NA	M3	Oromia	Debub Mirab Shewa	Dendi	38.2833	8.86667	3	2066	17.9	14.7	0.76	10.75	27.6	8.4	19.2	17.1	17.2	19.4	16.8	1064	243	8	91	628	32	216	614	44.095	45.1916	43.2009	94.6029	94.8039	94.79	72.2311	91.9436	50.6481	29.9562	37.5054	23.0334	22.5762	20.9508	23.8632
236757	T_314	Eragrostis tef	landrace	NA	EBI	NA	NA	M3	Oromia	Mirab Shewa	Adda Berga	37.8053	9.03333	5	2251	17	14.7	0.77	10.24	26.6	7.6	19	16.2	16.6	18.4	15.9	1095	243	8	87	631	36	213	621	42.6234	42.8036	42.7185	91.7157	92.1158	92.1312	67.45	68.8063	59.2788	27.1696	23.8062	27.9048	23.0285	18.4668	27.7329
236962	T_220	Eragrostis tef	landrace	NA	EBI	NA	NA	SM3	Oromia	Misraq Shewa	Gimbichu	39.1667	8.91667	3	2209	18	14.2	0.74	11.27	27.4	8.3	19.1	17.7	16.5	19.4	16.5	939	243	6	92	568	31	187	31	45.8117	46.6244	45.1308	93.6405	93.9079	93.9038	77.4106	99.2259	58.8246	31.3935	36.9751	27.4989	22.8476	24.594	20.8533
237122	T_99	Eragrostis tef	landrace	NA	EBI	NA	NA	M3	Amhara	North Shewa	Mafudmezezo Mojana	39.8167	9.88333	2	2052	18.6	13.5	0.7	13.46	28.3	9.1	19.2	18.6	16.8	20.4	16.8	1022	264	12	82	560	62	256	62	57.8293	57.6093	57.675	97.9713	98.3882	97.4488	75.1427	98.3963	52.9193	30.5429	36.6216	25.4691	21.8224	21.7788	20.8533
237126	T_85	Eragrostis tef	landrace	NA	EBI	NA	NA	M3	Amhara	North Shewa	Kewet	39.8167	10	4	2319	18.7	13.6	0.69	13.91	28.6	9.1	19.5	18.7	17	20.7	17	1045	261	13	81	572	66	258	66	56.3578	56.1765	56.2276	98.4525	98.3882	98.3351	77.0429	93.0498	63.8213	30.0149	31.4954	28.7167	24.7774	23.2692	27.7329
237201	T_384	Eragrostis tef	landrace	NA	EBI	NA	NA	SM3	Tigray	Mehakelegnaw	Adwa	38.8167	14.3167	1	1561	22.2	16.5	0.7	17.18	33.8	10.4	23.4	21.9	20.7	24.6	20.4	681	195	10	113	456	35	83	40	41.1519	41.3708	41.2711	83.5354	84.4993	84.598	63.098	67.2392	47.9226	24.2363	22.9223	20.5976	21.0686	19.2948	21.2833
237571	T_222	Eragrostis tef	landrace	NA	EBI	NA	NA	SM3	Oromia	Mirab Arsi	Arsi Negele	38.6598	7.31667	4	1962	17.6	14	0.74	8.65	26.3	7.4	18.9	17.2	16.6	18.9	16.6	942	155	8	55	410	64	258	64	59.7914	59.5197	59.6049	100.377	101.076	99.2213	77.1348	102.544	54.7363	29.9562	35.2958	25.0631	22.4255	22.1928	22.1433
237715	T_251	Eragrostis tef	landrace	NA	EBI	NA	NA	SH3	Oromia	Misraq Wellega	Diga Leka	36.5	8.83333	5	2114	18	13.6	0.79	10.58	27.4	10.2	17.2	16.7	18.5	19.4	16.6	1964	365	13	82	1042	50	187	999	40.6614	40.8932	40.7886	83.0542	84.0513	84.1549	66.1015	65.2112	58.8246	27.6096	25.5738	27.4989	23.9331	20.5368	28.1629
237720	T_315	Eragrostis tef	landrace	NA	EBI	NA	NA	M3	Oromia	Debub Mirab Shewa	Walisona Goro	38.0833	8.41667	3	2084	17.5	14.1	0.8	9.62	26.5	8.9	17.6	16.5	17.2	18.8	16.3	1226	254	11	82	679	42	277	661	44.5855	44.714	44.6483	98.9337	98.8362	98.7782	71.3117	80.421	59.2788	28.3429	28.2253	27.0929	21.3702	19.7088	21.7133
237729	T_337	Eragrostis tef	landrace	NA	EBI	NA	NA	SH3	SNNP	Hadiya	Limo	37.9598	7.651	5	2224	16.8	14.6	0.75	8.55	26.6	7.2	19.4	16	16.4	18.1	16	1001	165	16	61	457	54	222	457	48.7548	49.0124	48.5081	96.5277	96.5961	96.5625	77.2881	96.0918	61.55	36.1162	43.6922	34.4001	23.7823	25.5048	22.5732
238142	T_418	Eragrostis tef	landrace	NA	EBI	NA	NA	SM4	Tigray	Debubawi	Alaje	39.5	13.05	1	2338	16.9	15.9	0.7	16.04	28.5	6	22.5	17.5	14.9	19	14.9	599	200	3	131	431	14	93	14	46.5475	46.6244	46.5782	98.9337	98.8362	98.7782	73.5183	94.4325	52.0108	29.5749	36.3564	23.0334	21.2797	20.7024	20.4234
238143	T_405	Eragrostis tef	landrace	NA	EBI	NA	NA	SM2	Tigray	Debubawi	Ganta Afeshum	39.0333	13.0833	1	1433	23.6	16.8	0.76	15.2	34.4	12.4	22	23.7	22.3	25.9	22	653	216	9	124	457	32	111	33	45.5665	45.6692	45.6133	95.5653	95.7	95.6763	67.7872	84.5692	44.7429	24.2363	24.69	18.9738	21.0686	19.7088	20.8533
238146	T_385	Eragrostis tef	landrace	NA	EBI	NA	NA	SM2	Tigray	Semien Mi'irabaw	Adwa	38.0667	14.0333	1	1330	25.1	17.3	0.69	23	38.4	13.4	25	24.3	23.9	28.3	22.9	788	246	2	131	593	6	166	582	44.5855	44.714	44.6483	94.6029	94.8039	94.79	77.1348	97.4745	59.7331	30.6895	36.1797	26.281	22.5762	21.7788	23.0032
238165	T_406	Eragrostis tef	landrace	NA	EBI	NA	NA	SM3	Tigray	Misraqawi	Ganta Afeshum	39.4852	13.9583	1	2266	17.2	15.5	0.71	15.77	27.4	5.7	21.7	18.1	15.3	19.2	15	610	165	9	103	364	34	148	36	46.057	46.6244	45.6133	97.4901	97.4921	97.4488	67.9404	83.1865	46.5599	26.5829	29.1091	21.4095	21.6717	21.3648	20.8533
238176	T_386	Eragrostis tef	landrace	NA	EBI	NA	NA	SM2	Tigray	Mehakelegnaw	Degua Temben	38.8333	13.5	1	1627	23	16.9	0.73	16.61	34.6	11.5	23.1	22.1	22.1	25.2	21.3	720	253	4	136	558	18	75	522	44.5855	44.714	44.6483	94.1217	94.3559	94.3469	71.5875	82.1725	58.3703	27.9029	29.1091	25.0631	24.2648	25.1736	24.2931
238183	T_387	Eragrostis tef	landrace	NA	EBI	NA	NA	SM2	Tigray	Semien Mi'irabaw	Laelay Maychew	38.0833	14.0667	1	1390	24.9	17.1	0.68	22.87	38	13.2	24.8	24.1	23.8	28.1	22.7	798	250	1	131	601	5	169	591	45.076	45.1916	45.1308	94.6029	94.8039	94.79	75.0201	94.8012	56.0991	30.8949	37.2403	25.8751	22.9984	24.18	21.7133
238202	T_437	Eragrostis tef	landrace	NA	EBI	NA	NA	SM2	Tigray	Semien Mi'irabaw	Tahtay Koraro	38.15	14.1	1	1593	23.5	16.6	0.69	21.25	36	12.2	23.8	22.7	22.4	26.5	21.4	846	269	1	132	641	5	178	630	42.6234	42.8036	42.7185	91.2345	91.6678	91.6881	61.0753	58.3898	50.6481	24.0603	22.834	20.1917	19.953	17.8872	19.5634
238206	T_76	Eragrostis tef	landrace	NA	EBI	NA	NA	SM4	Amhara	Debub Gondar	Dabat	38.15	12.15	3	2447	15.8	15.8	0.76	12.2	26.5	5.8	20.7	14.7	15.9	17.3	14.5	1220	369	5	123	861	21	131	87	45.8117	45.6692	46.0958	94.6029	94.8039	94.79	68.8292	80.7898	51.5566	28.1962	31.7606	23.4393	21.3702	20.5368	20.8533
238207	T_69	Eragrostis tef	landrace	NA	EBI	NA	NA	SM3	Amhara	Debub Gondar	Lay Armacho	38.1	12.15	5	2702	15.1	15.5	0.75	12.07	25.6	5.2	20.4	14.5	15.2	16.6	13.8	1276	383	6	121	895	22	138	93	48.5096	48.5348	48.5081	99.8961	99.7322	99.6645	74.6217	90.8375	58.8246	31.3055	34.9423	29.1227	25.6819	25.7532	27.7329
238210	T_59	Eragrostis tef	landrace	NA	EBI	NA	NA	SM3	Amhara	Debub Gondar	Gondar Zuria	38.0833	12.1333	3	2202	18.1	16	0.79	11.29	28.7	8.5	20.2	16.9	18.3	19.6	16.9	1026	320	3	125	737	17	100	737	NA	NA	NA	NA	NA	NA	NA	NA	NA	NA	NA	NA	NA	NA	NA
238211	T_60	Eragrostis tef	landrace	NA	EBI	NA	NA	SM3	Amhara	Debub Gondar	Gondar Zuria	38.0833	12.1333	3	2202	18.1	16	0.79	11.29	28.7	8.5	20.2	16.9	18.3	19.6	16.9	1026	320	3	125	737	17	100	737	NA	NA	NA	NA	NA	NA	NA	NA	NA	NA	NA	NA	NA	NA	NA
238212	T_15	Eragrostis tef	landrace	NA	EBI	NA	NA	M3	Amhara	Mirab Gojjam	Bahir Dar	37.4833	11.6333	6	1932	18.9	14.7	0.71	12.81	28.8	8.2	20.6	18.2	17.7	20.8	17.5	1384	417	4	122	993	16	98	35	41.1519	41.3708	41.2711	83.5354	84.4993	84.598	61.5043	70.7421	39.7461	24.9696	26.4576	19.3798	19.1087	16.3968	18.7035
238216	T_48	Eragrostis tef	landrace	NA	EBI	NA	NA	M3	Amhara	Mirab Gojjam	Debre Markos	37.15	11.0333	6	2352	16	14.5	0.74	8.63	25.5	6.1	19.4	15.3	15.4	17.2	15.2	1701	393	14	93	1019	64	217	91	39.6803	39.938	39.8237	84.979	85.8434	85.9274	68.5534	75.3511	56.0991	26.2896	23.3643	25.8751	23.4808	22.1928	25.1531
238217	T_33	Eragrostis tef	landrace	NA	EBI	NA	NA	M3	Amhara	Mirab Gojjam	Debre Markos	37.15	11.0333	5	2352	16	14.5	0.74	8.63	25.5	6.1	19.4	15.3	15.4	17.2	15.2	1701	393	14	93	1019	64	217	91	45.8117	46.1468	45.6133	96.5277	96.5961	96.5625	78.9124	102.821	59.7331	31.3642	39.0963	25.4691	24.6869	27.9888	22.5732
238219	T_37	Eragrostis tef	landrace	NA	EBI	NA	NA	M3	Amhara	Misraq Gojjam	Machakel	37.5568	10.437	6	2338	16.3	13.3	0.74	11.23	25.7	7.8	17.9	15	16.2	18	15	1413	327	12	94	861	48	213	861	52.9242	56.6541	48.9906	95.5653	96.148	95.2332	87.8923	112.776	76.5402	38.4628	49.437	35.618	24.2346	26.3328	23.0032
238225	T_47	Eragrostis tef	landrace	NA	EBI	NA	NA	M3	Amhara	Misraq Gojjam	Guzamn	37.6	10.3667	6	2219	17.1	13.5	0.74	12.07	26.7	8.5	18.2	15.7	17.1	18.9	15.7	1329	322	8	97	824	36	199	824	45.5665	45.6692	45.6133	90.7533	91.2197	91.245	73.1506	90.5609	54.7363	28.0496	29.551	25.0631	24.9884	25.9188	25.583
238232	T_282	Eragrostis tef	landrace	NA	EBI	NA	NA	SM4	Oromia	North Shewa	Wara Jarso	39.485	10.0833	3	2763	14.2	13.1	0.71	12.75	23.2	4.8	18.4	14.4	12.5	15.9	12.5	1036	315	7	109	690	37	185	37	44.5855	44.714	44.6483	92.6781	93.0118	93.0175	68.0937	80.8819	49.2853	27.0229	29.9929	21.8155	20.6164	18.4668	20.8533
238636	T_223	Eragrostis tef	landrace	NA	EBI	NA	NA	NA	NA	NA	Ada'A Chukala	NA	NA	3	NA	NA	NA	NA	NA	NA	NA	NA	NA	NA	NA	NA	NA	NA	NA	NA	NA	NA	NA	NA	NA	NA	NA	NA	NA	NA	NA	NA	NA	NA	NA	NA	NA	NA	NA
239265	T_182	Eragrostis tef	landrace	NA	EBI	NA	NA	H3	Oromia	Arsi	Dodotana Sire	39.4393	8.1225	6	2513	16.5	14	0.8	5.79	24.8	7.5	17.3	16.4	15.7	17.1	15.6	1036	182	14	59	485	73	254	101	45.5665	45.6692	45.6133	87.8662	88.5316	88.5862	73.3038	86.8737	58.8246	29.9562	33.9701	26.281	23.6316	22.1928	25.583
239281	T_184	Eragrostis tef	landrace	NA	EBI	NA	NA	H4	Oromia	Arsi	Tena	39.5192	7.79817	3	2424	15.5	13.9	0.78	7.53	23.9	6.2	17.7	15.4	14.5	16.4	14.5	1157	173	19	48	466	102	345	134	47.5285	49.49	45.6133	96.5277	96.5961	96.5625	76.5219	100.24	55.1906	31.2762	39.715	24.6572	22.4255	20.9508	23.4332
239297	T_185	Eragrostis tef	landrace	NA	EBI	NA	NA	H3	Oromia	Arsi	Robe	39.7652	7.828	3	2444	15.7	14.1	0.81	6.82	24	6.6	17.4	15.9	14.8	16.4	14.7	1169	181	16	50	475	98	350	145	44.095	44.2364	44.1659	91.2345	91.6678	91.6881	74.2233	95.6309	52.9193	29.0762	34.412	23.4393	20.6164	20.1228	19.1335
239304	T_186	Eragrostis tef	landrace	NA	EBI	NA	NA	SM2	Oromia	Arsi	Jeju	39.5685	8.50783	4	1256	22.9	14.8	0.71	16.32	32.8	12.2	20.6	23.5	20.5	24.8	20.5	667	157	4	86	384	29	160	29	45.5665	45.6692	45.6133	96.0465	96.148	96.1194	74.3765	98.3963	50.6481	30.1029	36.1797	24.6572	24.5361	28.4028	21.7133
239322	T_188	Eragrostis tef	landrace	NA	EBI	NA	NA	M3	Oromia	Arsi	Merti	39.8645	8.43233	3	2049	18.5	14.3	0.76	11.83	27.7	9	18.7	18.8	17.2	19.9	16.8	1010	185	7	69	510	54	285	55	46.057	46.1468	46.0958	96.0465	96.148	96.1194	74.07	89.6391	58.3703	30.1615	33.705	27.0929	22.2144	20.3712	23.4332
239363	T_199	Eragrostis tef	landrace	NA	EBI	NA	NA	SH3	Oromia	Mirab Arsi	Adaba	39.5108	7.04167	6	2647	13.7	15	0.79	7.82	22.7	3.9	18.8	13.5	12.8	14.7	12.7	899	159	14	57	404	72	244	108	45.5665	45.6692	45.6133	94.6029	94.8039	94.79	66.8371	77.5634	48.8311	27.9029	29.9929	24.2512	22.335	22.7724	21.2833
239370	T_316	Eragrostis tef	landrace	NA	EBI	NA	NA	M3	Oromia	Mirab Shewa	Ambo	37.8333	8.98333	2	2133	17.8	14.8	0.77	10.56	27.4	8.2	19.2	16.9	17.3	19.1	16.6	1031	223	8	86	593	37	156	571	46.057	46.6244	45.6133	94.6029	94.8039	94.79	76.2154	97.0136	57.4618	32.3029	39.715	27.4989	24.8377	25.9188	25.1531
239375	T_317	Eragrostis tef	landrace	NA	EBI	NA	NA	M3	Oromia	Mirab Shewa	Cheliya	37.4383	9.02317	3	2328	16.4	14.9	0.78	8.6	26.1	7	19.1	15.5	16.2	17.6	15.5	1333	296	9	86	747	42	266	747	58.0746	63.8181	51.8854	103.746	104.213	102.323	78.0543	106.232	53.8278	31.3055	40.6872	23.8453	24.0839	23.8488	25.1531
239379	T_253	Eragrostis tef	landrace	NA	EBI	NA	NA	WB	Oromia	Horo Guduru	Abay Chomen	37.2933	9.59333	6	2236	16.3	15.3	0.75	9.02	26.6	6.3	20.3	15.6	15.8	17.6	15.3	1352	349	6	99	824	27	222	88	44.095	44.2364	44.1659	94.6029	94.8039	94.79	63.8642	73.2309	44.2886	25.5269	25.9273	21.4095	21.0686	20.1228	20.4234
239390	T_254	Eragrostis tef	landrace	NA	EBI	NA	NA	SH3	Oromia	Misraq Wellega	Guto Wayu	36.55	9.08333	6	2064	17.7	13	0.78	12.59	27.1	10.5	16.6	16.1	18.4	19.3	16	1994	393	9	85	1100	43	162	1037	48.0191	48.0572	48.0256	98.9337	98.8362	98.7782	79.8931	86.4128	78.8115	30.2495	31.7606	29.1227	23.2999	19.626	27.3029
239393	T_268	Eragrostis tef	landrace	NA	EBI	NA	NA	H3	Oromia	Ilubabor	Bedele	36.3833	8.51667	6	1770	19.6	14.6	0.73	11.84	30	10.1	19.9	18.8	19.4	21.3	18.5	1833	328	15	79	959	58	182	918	43.6044	43.7588	43.6834	93.6405	93.9079	93.9038	73.7635	91.0218	56.0991	30.2495	33.9701	27.0929	20.4656	18.8808	19.9934
239395	T_271	Eragrostis tef	landrace	NA	EBI	NA	NA	SH3	Oromia	Jimma	Mana	36.75	7.75	5	2024	18.2	15.1	0.76	8.49	27.9	8.2	19.7	17.7	18	19.5	17.4	1831	311	23	65	847	106	456	202	45.5665	45.6692	45.6133	96.5277	96.5961	96.5625	91.8459	139.878	61.55	33.3589	42.8967	27.4989	26.7373	28.6512	27.7329
239720	T_200	Eragrostis tef	landrace	NA	EBI	NA	NA	H3	Oromia	Bale	Ginir	40.6922	7.14583	2	1941	18	14.1	0.77	7.68	26.8	8.7	18.1	18.8	17.4	18.8	16.8	1134	259	6	89	586	46	586	80	45.076	45.1916	45.1308	96.5277	96.5961	96.5625	76.5832	96.737	58.8246	28.0789	31.8489	23.0334	22.8476	22.11	23.4332
239725	T_201	Eragrostis tef	landrace	NA	EBI	NA	NA	SH3	Oromia	Bale	Gaserana Gololcha	40.1755	7.37533	6	2283	16	14.2	0.79	8.22	24.5	6.7	17.8	16.7	15.3	16.7	14.8	1190	198	12	56	457	74	457	188	43.6044	43.7588	43.6834	87.8662	88.5316	88.5862	69.3196	79.0383	54.7363	27.7269	29.9045	23.8453	21.0385	18.384	22.1433
241117	T_289	Eragrostis tef	landrace	NA	EBI	NA	NA	SH3	Oromia	Mirab Hararghe	Habro	40.5972	8.83617	4	1749	20.5	14.1	0.74	12.78	29.9	11	18.9	20.9	18.7	22.1	18.7	1067	173	7	62	470	66	358	66	58.3198	58.0869	58.1575	98.4525	98.8362	97.8919	71.7714	86.8737	54.2821	29.6629	39.273	20.5976	23.7823	23.4348	24.7231
241662	T_351	Eragrostis tef	landrace	NA	EBI	NA	NA	SH3	SNNP	Wolayita	Boloso Sore	37.7055	7.07783	5	1732	20.4	14.7	0.77	10.57	30.5	11.5	19	18.9	20.8	21.6	18.9	1289	200	20	54	534	97	272	534	36.7373	37.0724	36.9288	79.4452	79.571	81.9392	60.5236	62.2614	45.1971	23.7963	22.4804	19.7857	21.6717	22.6068	19.5634
241664	T_290	Eragrostis tef	landrace	NA	EBI	NA	NA	M3	Oromia	Mirab Arsi	Asebot	38.383	7.28917	4	1741	19.2	14.5	0.75	7.23	28.4	9.1	19.3	18.6	18.6	20.2	18.5	919	127	14	53	374	66	192	105	44.5855	44.714	44.6483	96.5277	96.5961	96.5625	85.2565	94.2482	86.9879	35.5295	40.1569	36.0239	25.0186	26.1672	25.4111
242144	T_168	Eragrostis tef	landrace	NA	EBI	NA	NA	M3	Amhara	Mirab Gojjam	Achefer	37.15	11.6667	5	1810	19.1	14.5	0.69	12.84	29.1	8.3	20.8	18.5	17.8	21	17.6	1424	415	3	121	1013	13	93	31	43.6044	43.7588	43.6834	94.1217	94.3559	94.3469	74.2539	87.8877	60.6415	28.4602	30.3464	25.4691	21.6717	21.3648	20.8533
242150	T_166	Eragrostis tef	landrace	NA	EBI	NA	NA	M3	Amhara	Mirab Gojjam	Bure Wemberma	37.0333	10.7167	3	2110	17.2	14.4	0.72	9.12	27	7.2	19.8	16.4	16.7	18.6	16.4	1654	373	11	94	989	49	218	989	44.095	44.2364	44.1659	93.6405	93.9079	93.9038	78.8205	107.614	54.7363	34.4735	44.4876	29.1227	25.29	25.9188	26.443
242152	T_10	Eragrostis tef	landrace	NA	EBI	NA	NA	M3	Amhara	Agew Awi	Ankasha	37.05	10.7667	6	2415	15.6	14.2	0.73	8.83	25.2	6	19.2	14.9	15.2	17	14.9	1805	399	20	86	1034	80	262	1034	44.095	44.2364	44.1659	94.6029	94.8039	94.79	71.0052	79.4992	59.2788	28.0496	28.2253	26.281	25.5915	27.9888	25.1531
242170	T_67	Eragrostis tef	landrace	NA	EBI	NA	NA	M3	Amhara	Semen Gondar	Lay Armacho	37.4167	12.7167	5	2092	19.2	13.9	0.72	14.25	29.4	10.2	19.2	18	18.9	21.3	17.6	1128	321	3	114	784	19	143	741	NA	NA	NA	NA	NA	NA	NA	NA	NA	NA	NA	NA	NA	NA	NA
242178	T_64	Eragrostis tef	landrace	NA	EBI	NA	NA	M3	Amhara	Semen Gondar	Dembia	37.3667	12.45	3	2004	19.4	13.8	0.72	14.64	29.6	10.6	19	18	19.3	21.6	17.8	1132	321	3	115	793	15	131	746	57.0936	56.6541	57.1926	100.858	101.076	100.108	74.0394	90.4687	57.4618	30.6895	38.8311	23.8453	24.5965	27.7404	22.5732
242184	T_123	Eragrostis tef	landrace	NA	EBI	NA	NA	M3	Amhara	Semen Gondar	Belesa	37.6167	12.4	6	2122	19.3	14.7	0.75	13.43	29.6	10.1	19.5	18.1	19.2	21.3	17.9	1088	328	4	121	780	16	108	750	44.5855	44.714	44.6483	92.6781	93.0118	93.0175	71.6182	84.5692	56.0991	27.3162	27.7834	24.6572	21.3702	20.5368	20.8533
242185	T_74	Eragrostis tef	landrace	NA	EBI	NA	NA	M3	Amhara	Semen Gondar	Belesa	37.6167	12.3667	3	2136	19.1	14.7	0.75	13.36	29.4	9.8	19.6	18	19	21.1	17.7	1103	333	4	121	790	16	108	762	NA	NA	NA	NA	NA	NA	NA	NA	NA	NA	NA	NA	NA	NA	NA
242187	T_57	Eragrostis tef	landrace	NA	EBI	NA	NA	M3	Amhara	Debub Gondar	Belesa	37.7333	12.2833	1	2744	14.5	14.6	0.74	12.3	24.5	4.8	19.7	13.8	14.3	16.2	13.2	1325	385	7	116	912	25	148	106	41.1519	41.3708	41.2711	84.4978	85.3954	85.4843	62.4238	70.2812	42.9259	23.9429	24.2481	18.5679	20.9179	19.2948	20.8533
242188	T_119	Eragrostis tef	landrace	NA	EBI	NA	NA	SM3	Amhara	Debub Gondar	Ebenat	38.0333	12.1	3	2039	19.1	16	0.8	10.62	29.6	9.7	19.9	17.9	19.1	20.6	17.9	965	309	2	129	710	14	79	710	45.8117	45.6692	46.0958	98.9337	98.8362	98.7782	66.5919	78.6696	47.0141	25.5856	26.9879	20.5976	20.6465	18.1356	21.2833
242191	T_116	Eragrostis tef	landrace	NA	EBI	NA	NA	M3	Amhara	Debub Gondar	Fogera	37.7167	11.9833	3	1795	20.5	15.3	0.75	11.22	30.7	10.5	20.2	19.8	20.8	22.2	19.5	1093	349	2	129	810	8	71	807	41.1519	41.3708	41.2711	87.8662	88.5316	88.5862	71.2197	77.3791	62.0043	26.9936	26.3692	25.0631	20.0736	16.1484	21.7133
242196	T_125	Eragrostis tef	landrace	NA	EBI	NA	NA	M4	Amhara	Debub Gondar	Farta	38.1167	11.8167	3	2740	14.6	15.5	0.75	12.17	25.4	4.8	20.6	13.5	14.7	16.1	13.2	1437	418	9	118	999	29	155	114	46.057	46.1468	46.0958	98.9337	98.8362	98.7782	69.4115	75.6276	58.3703	27.3749	29.2859	23.4393	21.0686	20.5368	19.9934
242197	T_124	Eragrostis tef	landrace	NA	EBI	NA	NA	M4	Amhara	Debub Gondar	Farta	38.0833	11.8333	6	2675	15	15.6	0.74	12.36	26	5.1	20.9	13.9	15.2	16.5	13.7	1464	425	9	118	1019	29	152	118	45.5665	45.6692	45.6133	91.2345	91.6678	91.6881	69.0131	81.3428	51.5566	26.4069	29.4626	20.5976	22.727	21.7788	23.4332
242201	T_110	Eragrostis tef	landrace	NA	EBI	NA	NA	SM3	Amhara	Semen Wello	Bugna	39.0167	12.0333	4	2332	16.6	16.2	0.76	10.98	27.1	6	21.1	16.9	15.2	18	15.1	810	262	9	123	562	31	136	43	45.076	45.1916	45.1308	92.6781	93.0118	93.0175	69.105	82.0803	51.1023	27.9029	31.3186	23.0334	22.4858	21.9444	22.5732
242208	T_420	Eragrostis tef	landrace	NA	EBI	NA	NA	SM3	Tigray	Debubawi	Ofla	39.5167	12.5167	2	2430	17.6	16.3	0.69	16.94	30	6.5	23.5	18.7	15.7	20	15.6	787	215	16	100	463	50	257	58	51.9432	51.8781	51.8854	92.6781	93.0118	93.0175	68.9211	82.9099	49.7396	27.6389	30.0813	23.4393	21.1289	20.2884	20.4234
242552	T_408	Eragrostis tef	landrace	NA	EBI	NA	NA	SM3	Tigray	Mehakelegnaw	Wukro	38.9893	13.6	1	1816	22.1	16.6	0.72	15.79	33.5	10.7	22.8	21.3	21.3	24.3	20.5	713	260	3	140	563	18	74	519	44.5855	44.714	44.6483	92.1969	92.5638	92.5744	66.2548	80.8819	43.8344	25.7029	26.4576	21.4095	21.6717	21.3648	20.8533
242556	T_439	Eragrostis tef	landrace	NA	EBI	NA	NA	SM2	Tigray	Semien Mi'irabaw	Laelay Adiyabo	38.2833	14.0167	3	1487	24.1	17.1	0.69	21.16	36.9	12.4	24.5	23.3	23	27.1	22.1	792	248	2	129	594	9	164	582	NA	NA	NA	NA	NA	NA	NA	NA	NA	NA	NA	NA	NA	NA	NA
242568	T_388	Eragrostis tef	landrace	NA	EBI	NA	NA	SM3	Tigray	Mehakelegnaw	Adwa	39.0337	14.101	1	2268	17.3	15.8	0.7	14.69	28.1	5.6	22.5	17.5	15.7	19.3	15.5	619	197	2	125	441	9	134	15	48.2643	48.5348	48.0256	98.4525	98.3882	98.3351	83.387	102.452	73.3605	33.7989	39.8033	31.5584	26.888	27.8232	29.0228
243489	T_149	Eragrostis tef	landrace	NA	EBI	NA	NA	M4	Amhara	Debub Wollo	Dessie Zuria	39.5667	10.95	3	3266	11	14.7	0.74	11.9	20.5	0.7	19.8	11.7	9.3	12.3	9.3	1190	337	13	105	777	48	437	48	51.2074	52.8333	49.473	106.633	106.005	105.868	79.5867	104.849	59.7331	33.0362	42.3664	27.0929	24.3854	25.9188	23.8632
243491	T_151	Eragrostis tef	landrace	NA	EBI	NA	NA	M4	Amhara	Debub Wollo	Dessie Zuria	39.2167	11.1333	3	3087	12	14.9	0.75	10.85	21.4	1.7	19.7	12.5	10.5	13.2	10.4	1167	339	12	109	780	43	207	68	47.5285	47.5796	47.5432	115.294	114.069	113.845	67.9404	74.4293	55.1906	25.3802	26.8112	20.1917	23.0285	21.7788	24.2931
243492	T_150	Eragrostis tef	landrace	NA	EBI	NA	NA	M4	Amhara	Debub Wollo	Tenta	39.25	11.2333	3	2955	12.8	15.2	0.75	11.31	22.4	2.2	20.2	13.3	11.3	14	11.1	1121	326	12	109	750	42	197	65	45.5665	45.6692	45.6133	100.858	100.628	100.551	67.5113	82.3568	46.1056	28.3722	33.1747	22.6274	23.0587	22.6896	23.4332
243498	T_137	Eragrostis tef	landrace	NA	EBI	NA	NA	SM3	Amhara	Debub Wollo	Tenta	39.25	11.3333	1	2796	12.9	15.4	0.75	11.42	22.6	2.3	20.3	13.5	11.4	14.2	11.2	1095	324	12	111	735	41	419	62	44.3402	44.714	44.1659	85.4602	86.2914	86.3705	60.5849	60.6022	47.0141	24.6762	23.3643	21.4095	21.6717	22.1928	19.9934
243501	T_114	Eragrostis tef	landrace	NA	EBI	NA	NA	SM4	Amhara	Semen Wello	Dawuntna Delant	39.2333	11.5667	3	2762	13	15.6	0.75	11.55	23	2.4	20.6	13.6	11.5	14.3	11.3	1028	320	9	116	702	34	400	51	48.7548	48.5348	48.9906	114.813	113.621	113.402	73.3651	77.84	67.9095	28.4896	29.551	26.281	23.119	24.5112	21.7133
243502	T_132	Eragrostis tef	landrace	NA	EBI	NA	NA	M3	Amhara	Debub Wollo	Ambasel	39.4833	11.2667	3	2246	16.6	15.3	0.72	13.79	26.9	5.8	21.1	17.6	14.7	18.2	14.7	1100	273	19	92	664	81	369	81	43.3592	43.2812	43.6834	87.8662	88.5316	88.5862	66.6685	76.1346	49.7396	25.4096	25.5738	21.4095	21.0686	18.4668	22.1433
243515	T_389	Eragrostis tef	landrace	NA	EBI	NA	NA	SM2	Tigray	Mehakelegnaw	Degua Temben	39.1167	13.6333	4	2306	17.6	15.6	0.72	13.51	27.8	6.4	21.4	17.8	16	19.5	16	667	217	2	133	498	9	134	9	44.5855	44.714	44.6483	94.6029	94.8039	94.79	64.0481	74.2449	43.8344	24.3829	24.2481	19.7857	20.9782	21.5304	18.7035
243518	T_390	Eragrostis tef	landrace	NA	EBI	NA	NA	SM3	Tigray	Mehakelegnaw	Kola Temben	39	13.6167	1	1847	21.9	16.5	0.72	15.52	33.2	10.5	22.7	21.1	21	24	20.3	708	258	3	140	560	16	75	517	44.5855	44.714	44.6483	97.0089	97.0441	97.0057	74.9895	91.0218	59.7331	29.8682	36.3564	23.8453	25.5915	29.2308	23.8632
243524	T_391	Eragrostis tef	landrace	NA	EBI	NA	NA	SM3	Tigray	Mehakelegnaw	Adwa	38.9	14.2167	1	2045	18.6	16	0.69	15.42	29.6	6.7	22.9	18.1	16.9	20.8	16.9	650	206	1	127	476	7	72	15	43.1139	43.2812	43.2009	92.1969	92.5638	92.5744	68.4001	82.7256	48.3768	26.8762	28.6672	22.6274	22.2747	20.1228	23.8632
243527	T_440	Eragrostis tef	landrace	NA	EBI	NA	NA	M2	Tigray	Semien Mi'irabaw	Tselemti	38.1333	13.5667	1	1382	24	17.2	0.69	20.89	37.1	12.5	24.6	23	23.2	27	22	804	251	2	130	608	8	74	586	51.4527	51.8781	50.9205	98.9337	98.8362	98.7782	73.4877	89.2704	57.0076	28.8416	30.6116	26.281	24.7774	24.9252	26.013
243543	T_72	Eragrostis tef	landrace	NA	EBI	NA	NA	M3	Amhara	Semen Gondar	Gondar Zuria	37.55	12.3167	1	1843	20.8	14.7	0.77	12.62	30.7	11.7	19	19.4	20.6	22.5	19.3	1049	316	2	123	768	10	94	729	38.9446	38.9828	39.3412	84.979	85.8434	85.9274	66.0402	72.4013	51.5566	23.7963	19.829	22.2215	21.4003	19.3776	22.1433
243545	T_120	Eragrostis tef	landrace	NA	EBI	NA	NA	M3	Amhara	Debub Gondar	Kemekem	37.8167	12.1167	1	1985	19.7	15.6	0.78	10.77	30.1	10.2	19.9	18.4	20.3	21.2	18.4	1026	336	1	132	769	8	60	769	54.3957	56.6541	51.8854	100.377	100.628	99.6645	78.514	109.919	51.5566	31.9215	39.0079	27.0929	22.5461	21.282	23.4332
243552	T_6	Eragrostis tef	landrace	NA	EBI	NA	NA	SH3	Amhara	Agew Awi	Banja	36.8667	10.95	6	2502	15	14.3	0.73	8.3	24.7	5.2	19.5	14.4	14.5	16.2	14.3	1927	422	24	84	1077	97	279	121	44.5855	44.714	44.6483	92.6781	93.0118	93.0175	65.6112	80.7898	42.0174	27.5509	32.4676	21.0036	19.5309	19.626	16.5536
244793	T_340	Eragrostis tef	landrace	NA	EBI	NA	NA	SH2	SNNP	Kembata Tembaro	Kacha Bira	37.6333	7.21667	5	1642	20.7	14.9	0.76	9.12	30.7	11.2	19.5	19.5	20.8	21.9	19.5	1252	198	19	57	539	90	257	526	55.1315	56.6541	53.3328	98.9337	99.2842	98.3351	75.8782	97.3823	56.0991	29.8095	36.1797	23.8453	23.2396	22.7724	23.8632
244795	T_353	Eragrostis tef	landrace	NA	EBI	NA	NA	H3	SNNP	Sidama	Bensa	38.8333	6.5	5	1889	18.3	15	0.76	7.23	27.7	8.2	19.5	18.1	17.7	19.2	17.3	1248	177	24	51	444	97	435	111	54.3957	54.2661	54.2977	99.8961	99.7322	99.6645	80.5061	104.388	62.9128	32.0095	40.1569	26.281	26.496	29.2308	26.443
244818	T_255	Eragrostis tef	landrace	NA	EBI	NA	NA	SH3	Oromia	Misraq Wellega	Bila Seyo	36.9833	9.16667	6	1862	18.6	14.4	0.75	10.73	28.6	9.5	19.1	17.6	18.8	20.1	17.4	1448	313	12	85	810	45	285	775	44.5855	44.714	44.6483	92.1969	92.5638	92.5744	74.4991	89.086	60.1873	30.6895	37.9473	24.6572	25.893	27.5748	26.443
244827	T_256	Eragrostis tef	landrace	NA	EBI	NA	NA	SH4	Oromia	Horo Guduru	Jimma Horo	37.1	9.56667	6	2554	15	14.4	0.77	7.33	24.5	5.9	18.6	14.3	14.8	16	14.3	1788	396	17	88	1031	66	335	1031	44.5855	44.714	44.6483	95.0841	95.252	95.2332	69.8406	79.6836	55.6448	27.0229	28.2253	23.4393	21.4003	21.0336	20.4234
244828	T_257	Eragrostis tef	landrace	NA	EBI	NA	NA	M3	Oromia	Horo Guduru	Jimma Horo	37.1667	9.33333	6	2233	16.5	14.9	0.76	8.48	26.5	7.1	19.4	15.9	16.5	17.7	15.7	1467	344	9	91	848	40	272	842	53.1694	53.7885	52.3679	98.9337	98.8362	98.7782	83.7241	115.45	61.55	33.4469	40.9523	29.5287	26.0438	27.5748	26.873
244847	T_259	Eragrostis tef	landrace	NA	EBI	NA	NA	SH3	Oromia	Horo Guduru	Amuru Jarte	37.16	9.8265	6	2468	15.3	14.4	0.76	8.37	25	6.1	18.9	14.5	15.1	16.5	14.5	1658	375	14	91	975	56	288	125	46.5475	46.6244	46.5782	103.264	102.868	102.766	74.9895	97.0136	53.8278	29.8975	36.0029	24.2512	23.8728	26.1672	22.1433
244852	T_260	Eragrostis tef	landrace	NA	EBI	NA	NA	SH3	Oromia	Horo Guduru	Amuru Jarte	37.16	9.8265	6	2468	15.3	14.4	0.76	8.37	25	6.1	18.9	14.5	15.1	16.5	14.5	1658	375	14	91	975	56	288	125	57.5841	65.2509	49.473	108.076	108.245	106.311	73.1506	96.5527	48.8311	29.9855	36.268	24.2512	25.5613	27.078	26.013
244885	T_269	Eragrostis tef	landrace	NA	EBI	NA	NA	SH3	Oromia	Ilubabor	Gechi	36.6598	8.32667	5	1816	19.8	15.1	0.75	9.4	30	10.1	19.9	19.1	19.8	21.2	18.9	1962	377	15	78	1024	74	230	996	53.4147	53.7885	52.8503	105.67	105.557	104.539	82.345	100.701	71.9978	30.6895	36.1797	26.281	24.3854	25.0908	24.7231
15340_a	T_291	Eragrostis tef	landrace	NA	EBI	NA	NA	SH3	Oromia	Mirab Shewa	Walmara	38.4333	8.9	3	2064	18	15	0.76	10.73	27.9	8.2	19.7	17.3	17.2	19.6	17	1041	246	7	93	618	28	211	617	53.4147	57.1317	49.473	99.8961	100.18	99.2213	79.1882	95.3543	67.9095	30.6895	32.6444	29.5287	24.5361	23.8488	26.443
15340_b	T_302	Eragrostis tef	landrace	NA	EBI	NA	NA	SH3	Oromia	Mirab Shewa	Walmara	38.4333	8.9	4	2064	18	15	0.76	10.73	27.9	8.2	19.7	17.3	17.2	19.6	17	1041	246	7	93	618	28	211	617	NA	NA	NA	NA	NA	NA	NA	NA	NA	NA	NA	NA	NA	NA	NA
Abola	T_480	Eragrostis tef	breeding_material	RIL-7	Hybridization	AARC	2015	NA	NA	NA	NA	NA	NA	4	NA	NA	NA	NA	NA	NA	NA	NA	NA	NA	NA	NA	NA	NA	NA	NA	NA	NA	NA	NA	61.0177	64.7733	56.7101	101.34	101.972	100.108	81.8853	91.4827	79.72	33.7695	39.273	31.9644	23.1793	22.1928	24.2931
Acc 225945	T_493	Eragrostis tef	breeding_material	Candidate genotype one /Elite line 1	Selection	AARC	NA	NA	NA	NA	NA	NA	NA	5	NA	NA	NA	NA	NA	NA	NA	NA	NA	NA	NA	NA	NA	NA	NA	NA	NA	NA	NA	NA	61.2629	61.4301	60.5699	101.821	102.42	100.551	75.9089	100.24	53.3736	29.9855	40.6872	20.1917	25.4709	28.0716	24.7231
Acc 237124	T_495	Eragrostis tef	breeding_material	Candidate genotype three/ Elite line 3	Selection	AARC	NA	NA	NA	NA	NA	NA	NA	4	NA	NA	NA	NA	NA	NA	NA	NA	NA	NA	NA	NA	NA	NA	NA	NA	NA	NA	NA	NA	60.0366	61.4301	58.1575	106.152	106.453	104.539	83.7241	113.145	63.8213	34.5028	45.9017	27.9048	26.0438	27.1608	27.3029
Acc 225931	T_494	Eragrostis tef	breeding_material	Candidate genotype two/ Elite line 2	Selection	AARC	NA	NA	NA	NA	NA	NA	NA	4	NA	NA	NA	NA	NA	NA	NA	NA	NA	NA	NA	NA	NA	NA	NA	NA	NA	NA	NA	NA	45.8117	46.1468	45.6133	98.9337	98.8362	98.7782	78.3301	98.765	62.0043	32.2149	39.4498	27.4989	23.6316	25.9188	21.7133
Ambo toke	T_484	Eragrostis tef	breeding_material	DZ-01-1278	Selection	HARC	2000	NA	NA	NA	NA	NA	NA	2	NA	NA	NA	NA	NA	NA	NA	NA	NA	NA	NA	NA	NA	NA	NA	NA	NA	NA	NA	NA	53.4147	53.3109	53.3328	109.039	108.245	108.084	72.2618	88.3486	54.2821	30.3669	36.0913	25.4691	23.7823	23.8488	24.2931
Asgori	T_444	Eragrostis tef	breeding_material	DZ-01-99	Selection	DZARC	1970	NA	NA	NA	NA	NA	NA	1	NA	NA	NA	NA	NA	NA	NA	NA	NA	NA	NA	NA	NA	NA	NA	NA	NA	NA	NA	NA	61.7534	61.4301	61.5348	110.964	110.933	108.97	76.8283	97.0136	59.2788	28.1962	31.3186	23.8453	22.4255	23.0208	21.2833
Boset	T_462	Eragrostis tef	breeding_material	DZ-Cr-409/ RIL50d	Hybridization	DZARC	2012	NA	NA	NA	NA	NA	NA	5	NA	NA	NA	NA	NA	NA	NA	NA	NA	NA	NA	NA	NA	NA	NA	NA	NA	NA	NA	NA	43.6044	43.7588	43.6834	90.7533	91.2197	91.245	75.2959	92.4045	59.2788	30.8362	34.8539	27.9048	22.8778	23.8488	21.7133
Dagem	T_478	Eragrostis tef	breeding_material	DZ-Cr-438 /RIL91A	Hybridization	DZARC	2016	NA	NA	NA	NA	NA	NA	2	NA	NA	NA	NA	NA	NA	NA	NA	NA	NA	NA	NA	NA	NA	NA	NA	NA	NA	NA	NA	58.3198	58.0869	58.1575	101.821	101.972	100.994	81.4255	106.232	63.8213	35.3828	46.7855	29.5287	26.1945	28.8168	26.013
Dega tef	T_458	Eragrostis tef	breeding_material	DZ-01-2675	Selection	DZARC	2005	NA	NA	NA	NA	NA	NA	2	NA	NA	NA	NA	NA	NA	NA	NA	NA	NA	NA	NA	NA	NA	NA	NA	NA	NA	NA	NA	64.6965	64.2957	64.4296	116.738	116.309	114.288	71.7714	85.0301	56.0991	27.0229	29.551	22.2215	23.7823	23.8488	24.2931
Dima	T_465	Eragrostis tef	breeding_material	DZ-01-2423	Selection	AARC	2005	NA	NA	NA	NA	NA	NA	2	NA	NA	NA	NA	NA	NA	NA	NA	NA	NA	NA	NA	NA	NA	NA	NA	NA	NA	NA	NA	58.3198	58.0869	58.1575	101.821	102.42	100.551	75.9089	100.24	53.3736	30.8362	39.273	23.8453	23.3301	25.0908	21.7133
Dukem	T_452	Eragrostis tef	breeding_material	DZ-01-974	Selection	DZARC	1995	NA	NA	NA	NA	NA	NA	2	NA	NA	NA	NA	NA	NA	NA	NA	NA	NA	NA	NA	NA	NA	NA	NA	NA	NA	NA	NA	59.7914	59.5197	59.6049	108.076	108.245	106.311	75.9089	99.779	53.8278	31.4229	37.9473	26.687	22.5762	22.1928	22.5732
dz-01-1001	T_485	Eragrostis tef	breeding_material	NA	DZ Gmp	NA	NA	NA	NA	NA	NA	NA	NA	2	NA	NA	NA	NA	NA	NA	NA	NA	NA	NA	NA	NA	NA	NA	NA	NA	NA	NA	NA	NA	NA	NA	NA	NA	NA	NA	NA	NA	NA	NA	NA	NA	NA	NA	NA
dz-01-1549	T_486	Eragrostis tef	breeding_material	NA	DZ Gmp	NA	NA	NA	NA	NA	NA	NA	NA	5	NA	NA	NA	NA	NA	NA	NA	NA	NA	NA	NA	NA	NA	NA	NA	NA	NA	NA	NA	NA	NA	NA	NA	NA	NA	NA	NA	NA	NA	NA	NA	NA	NA	NA	NA
dz-01-1755	T_487	Eragrostis tef	breeding_material	NA	DZ Gmp	NA	NA	NA	NA	NA	NA	NA	NA	5	NA	NA	NA	NA	NA	NA	NA	NA	NA	NA	NA	NA	NA	NA	NA	NA	NA	NA	NA	NA	NA	NA	NA	NA	NA	NA	NA	NA	NA	NA	NA	NA	NA	NA	NA
dz-01-1868	T_488	Eragrostis tef	breeding_material	NA	DZ Gmp	NA	NA	NA	NA	NA	NA	NA	NA	5	NA	NA	NA	NA	NA	NA	NA	NA	NA	NA	NA	NA	NA	NA	NA	NA	NA	NA	NA	NA	NA	NA	NA	NA	NA	NA	NA	NA	NA	NA	NA	NA	NA	NA	NA
dz-01-1986	T_490	Eragrostis tef	breeding_material	NA	DZ Gmp	NA	NA	NA	NA	NA	NA	NA	NA	5	NA	NA	NA	NA	NA	NA	NA	NA	NA	NA	NA	NA	NA	NA	NA	NA	NA	NA	NA	NA	NA	NA	NA	NA	NA	NA	NA	NA	NA	NA	NA	NA	NA	NA	NA
dz-01-betten-t-45	T_491	Eragrostis tef	breeding_material	NA	DZ Gmp	NA	NA	NA	NA	NA	NA	NA	NA	4	NA	NA	NA	NA	NA	NA	NA	NA	NA	NA	NA	NA	NA	NA	NA	NA	NA	NA	NA	NA	NA	NA	NA	NA	NA	NA	NA	NA	NA	NA	NA	NA	NA	NA	NA
Enatite	T_446	Eragrostis tef	breeding_material	DZ-01-354	Selection	DZARC	1970	NA	NA	NA	NA	NA	NA	4	NA	NA	NA	NA	NA	NA	NA	NA	NA	NA	NA	NA	NA	NA	NA	NA	NA	NA	NA	NA	47.5285	47.5796	47.5432	106.633	106.005	105.868	81.1191	103.005	66.0925	28.6362	34.412	22.2215	23.3301	25.5048	21.2833
Felagot	T_481	Eragrostis tef	breeding_material	RIL-77C	Hybridization	DZARC	2017	NA	NA	NA	NA	NA	NA	4	NA	NA	NA	NA	NA	NA	NA	NA	NA	NA	NA	NA	NA	NA	NA	NA	NA	NA	NA	NA	45.5665	45.6692	45.6133	95.0841	95.252	95.2332	69.2276	83.3708	50.1938	30.1029	36.1797	24.6572	24.0839	27.5748	21.2833
Gemechis	T_475	Eragrostis tef	breeding_material	DZ-Cr-387/RIL127	Hybridization	MARC	2007	NA	NA	NA	NA	NA	NA	5	NA	NA	NA	NA	NA	NA	NA	NA	NA	NA	NA	NA	NA	NA	NA	NA	NA	NA	NA	NA	44.095	44.2364	44.1659	92.1969	92.5638	92.5744	73.1199	87.2424	57.9161	32.0682	37.2403	29.1227	23.3301	25.9188	20.8533
Genete	T_468	Eragrostis tef	breeding_material	DZ-01-146	Selection	SARC	2005	NA	NA	NA	NA	NA	NA	2	NA	NA	NA	NA	NA	NA	NA	NA	NA	NA	NA	NA	NA	NA	NA	NA	NA	NA	NA	NA	61.7534	61.4301	61.5348	101.34	101.972	100.108	78.1462	108.813	51.5566	33.7109	45.283	26.281	23.8125	24.7596	23.4332
Gerado	T_454	Eragrostis tef	breeding_material	DZ-01-1281	Selection	DZARC	2002	NA	NA	NA	NA	NA	NA	2	NA	NA	NA	NA	NA	NA	NA	NA	NA	NA	NA	NA	NA	NA	NA	NA	NA	NA	NA	NA	49.4906	49.49	49.473	94.1217	94.3559	94.3469	80.8126	99.3181	68.818	27.4336	30.3464	22.6274	20.737	21.282	18.2735
Gibe	T_451	Eragrostis tef	breeding_material	DZ-Cr-255	Hybridization	DZARC	1993	NA	NA	NA	NA	NA	NA	5	NA	NA	NA	NA	NA	NA	NA	NA	NA	NA	NA	NA	NA	NA	NA	NA	NA	NA	NA	NA	56.8483	56.6541	56.7101	104.708	104.661	103.653	75.4185	96.4605	55.6448	29.1642	36.0029	22.2215	23.6316	26.3328	21.2833
Gimbichu	T_457	Eragrostis tef	breeding_material	DZ-01-899	Selection	DZARC	2005	NA	NA	NA	NA	NA	NA	3	NA	NA	NA	NA	NA	NA	NA	NA	NA	NA	NA	NA	NA	NA	NA	NA	NA	NA	NA	NA	62.7345	62.3853	62.4997	122.031	121.238	119.162	72.8441	72.5857	71.5435	33.0362	40.1569	29.1227	22.8778	19.2948	26.443
Gola	T_467	Eragrostis tef	breeding_material	DZ-01-2054	Selection	SARC	2003	NA	NA	NA	NA	NA	NA	2	NA	NA	NA	NA	NA	NA	NA	NA	NA	NA	NA	NA	NA	NA	NA	NA	NA	NA	NA	NA	60.7724	60.4749	60.5699	100.377	101.076	99.2213	74.6217	91.2984	58.3703	31.9215	38.1241	27.9048	22.727	22.6068	22.5732
Guduru	T_472	Eragrostis tef	breeding_material	DZ-01-1880	Selection	BARC	2006	NA	NA	NA	NA	NA	NA	4	NA	NA	NA	NA	NA	NA	NA	NA	NA	NA	NA	NA	NA	NA	NA	NA	NA	NA	NA	NA	63.7155	63.3405	63.4647	111.926	111.829	109.856	85.8695	112.684	70.635	36.7028	47.2274	32.7763	26.4357	27.8232	27.7329
Hibir-01	T_483	Eragrostis tef	breeding_material	DZ-01-974*P1222988	Hybridization	AARC	2017	NA	NA	NA	NA	NA	NA	5	NA	NA	NA	NA	NA	NA	NA	NA	NA	NA	NA	NA	NA	NA	NA	NA	NA	NA	NA	NA	55.3768	56.1765	54.2977	100.858	101.076	100.108	82.4063	111.025	62.0043	35.8228	48.5532	29.1227	25.3503	25.2564	27.3029
Holetta key	T_463	Eragrostis tef	breeding_material	DZ-01-2053	Selection	Holeta ARC	1999	NA	NA	NA	NA	NA	NA	4	NA	NA	NA	NA	NA	NA	NA	NA	NA	NA	NA	NA	NA	NA	NA	NA	NA	NA	NA	NA	51.4527	51.4005	51.4029	100.377	100.18	100.108	74.2233	94.7091	53.8278	30.5135	35.2075	26.687	23.2094	23.1036	23.4332
Kena	T_473	Eragrostis tef	breeding_material	23-Tafi-Adi-72	Selection	BARC	2008	NA	NA	NA	NA	NA	NA	5	NA	NA	NA	NA	NA	NA	NA	NA	NA	NA	NA	NA	NA	NA	NA	NA	NA	NA	NA	NA	59.3009	59.0421	59.1224	98.4525	99.2842	97.4488	79.8625	101.07	64.2755	34.6495	44.576	29.5287	27.3102	28.9824	29.0228
Key tena	T_456	Eragrostis tef	breeding_material	DZ-01-1681	Selection	DZARC	2002	NA	NA	NA	NA	NA	NA	2	NA	NA	NA	NA	NA	NA	NA	NA	NA	NA	NA	NA	NA	NA	NA	NA	NA	NA	NA	NA	58.8104	58.5645	58.64	105.67	106.005	104.096	73.7635	88.7173	58.3703	30.6895	37.5054	25.0631	24.6869	27.5748	23.0032
Kora	T_476	Eragrostis tef	breeding_material	DZ-Cr-438/RIL133B	Hybridization	DZARC	2014	NA	NA	NA	NA	NA	NA	4	NA	NA	NA	NA	NA	NA	NA	NA	NA	NA	NA	NA	NA	NA	NA	NA	NA	NA	NA	NA	60.7724	60.4749	60.5699	102.302	102.868	100.994	83.9693	113.883	63.8213	34.0629	45.4598	27.0929	25.893	32.1287	21.7133
Koye	T_455	Eragrostis tef	breeding_material	DZ-01-1285	Selection	DZARC	2002	NA	NA	NA	NA	NA	NA	2	NA	NA	NA	NA	NA	NA	NA	NA	NA	NA	NA	NA	NA	NA	NA	NA	NA	NA	NA	NA	56.8483	56.6541	56.7101	101.821	101.972	100.994	72.6909	91.4827	52.4651	33.3295	43.6922	26.687	25.7422	28.8168	24.7231
Laketch	T_471	Eragrostis tef	breeding_material	RIL273	Hybridization	SARC	2009	NA	NA	NA	NA	NA	NA	2	NA	NA	NA	NA	NA	NA	NA	NA	NA	NA	NA	NA	NA	NA	NA	NA	NA	NA	NA	NA	46.5475	47.102	46.0958	100.377	100.18	100.108	82.1917	113.145	59.2788	34.3562	45.9017	27.4989	25.7422	27.9888	25.583
Magna	T_445	Eragrostis tef	breeding_material	DZ-01-196	Selection	DZARC	1978	NA	NA	NA	NA	NA	NA	1	NA	NA	NA	NA	NA	NA	NA	NA	NA	NA	NA	NA	NA	NA	NA	NA	NA	NA	NA	NA	49.9811	49.9676	49.9555	104.708	104.213	104.096	75.7557	94.7091	58.3703	29.1642	33.7933	24.2512	22.6366	19.4604	25.583
Mechare	T_470	Eragrostis tef	breeding_material	Acc. 205953	Selection	SARC	2007	NA	NA	NA	NA	NA	NA	5	NA	NA	NA	NA	NA	NA	NA	NA	NA	NA	NA	NA	NA	NA	NA	NA	NA	NA	NA	NA	59.3009	59.0421	59.1224	101.34	101.972	100.108	76.4606	94.9856	60.1873	34.0042	43.0735	29.1227	26.4056	25.6704	29.8828
Melko	T_449	Eragrostis tef	breeding_material	DZ-Cr-82	Hybridization	DZARC	1982	NA	NA	NA	NA	NA	NA	2	NA	NA	NA	NA	NA	NA	NA	NA	NA	NA	NA	NA	NA	NA	NA	NA	NA	NA	NA	NA	53.4147	54.2661	52.3679	104.708	104.661	103.653	79.1882	105.033	58.3703	31.4522	38.0357	26.687	23.8728	25.3392	23.0032
Menagesha	T_448	Eragrostis tef	breeding_material	DZ-Cr-44	Hybridization	DZARC	1982	NA	NA	NA	NA	NA	NA	2	NA	NA	NA	NA	NA	NA	NA	NA	NA	NA	NA	NA	NA	NA	NA	NA	NA	NA	NA	NA	47.7738	47.5796	48.0256	102.302	101.972	101.88	77.7478	96.5527	62.4585	28.7829	30.8767	25.8751	21.0385	22.524	17.8435
Amarach	T_459	Eragrostis tef	breeding_material	HO-Cr-136	Hybridization	DZARC	2006	NA	NA	NA	NA	NA	NA	2	NA	NA	NA	NA	NA	NA	NA	NA	NA	NA	NA	NA	NA	NA	NA	NA	NA	NA	NA	NA	NA	NA	NA	NA	NA	NA	NA	NA	NA	NA	NA	NA	NA	NA	NA
Niguse	T_479	Eragrostis tef	breeding_material	RIL-125	Hybridization	DZARC	2017	NA	NA	NA	NA	NA	NA	4	NA	NA	NA	NA	NA	NA	NA	NA	NA	NA	NA	NA	NA	NA	NA	NA	NA	NA	NA	NA	55.3768	56.6541	53.8153	101.821	101.972	100.994	80.5674	101.807	65.6383	34.7962	45.0179	29.5287	24.114	21.8616	27.3029
Simada	T_461	Eragrostis tef	breeding_material	DZ-Cr-385/ RIL 295	Hybridization	DZARC	2009	NA	NA	NA	NA	NA	NA	4	NA	NA	NA	NA	NA	NA	NA	NA	NA	NA	NA	NA	NA	NA	NA	NA	NA	NA	NA	NA	42.1329	42.8036	41.7535	93.6405	93.9079	93.9038	66.4387	74.9824	50.1938	29.3695	32.2025	26.281	26.3453	29.6448	25.583
Tesfa	T_482	Eragrostis tef	breeding_material	RIL-125	Hybridization	DZARC	2017	NA	NA	NA	NA	NA	NA	4	NA	NA	NA	NA	NA	NA	NA	NA	NA	NA	NA	NA	NA	NA	NA	NA	NA	NA	NA	NA	53.1694	53.3109	52.8503	110.482	110.037	108.97	77.5945	92.4045	66.0925	34.0629	45.0179	27.4989	21.9732	21.7788	21.2833
Wellenkomi	T_447	Eragrostis tef	breeding_material	DZ-01-787	Selection	DZARC	1978	NA	NA	NA	NA	NA	NA	2	NA	NA	NA	NA	NA	NA	NA	NA	NA	NA	NA	NA	NA	NA	NA	NA	NA	NA	NA	NA	60.2819	59.9973	60.0874	115.776	115.413	113.402	79.5254	100.056	64.2755	30.3962	37.9473	23.8453	25.5613	25.008	28.1629
Werekiyu	T_477	Eragrostis tef	breeding_material	Acc.214746	Selection	SARC	2014	NA	NA	NA	NA	NA	NA	4	NA	NA	NA	NA	NA	NA	NA	NA	NA	NA	NA	NA	NA	NA	NA	NA	NA	NA	NA	NA	48.7548	51.4005	46.0958	97.9713	98.3882	97.4488	77.2268	102.821	54.7363	33.5349	42.9851	27.9048	24.5361	27.5748	22.5732
Yilmana	T_464	Eragrostis tef	breeding_material	DZ-01-1868	Selection	AARC	2005	NA	NA	NA	NA	NA	NA	3	NA	NA	NA	NA	NA	NA	NA	NA	NA	NA	NA	NA	NA	NA	NA	NA	NA	NA	NA	NA	46.5475	47.102	46.0958	103.264	102.868	102.766	77.8091	96.737	62.4585	33.0362	43.6922	25.8751	24.8678	26.4156	24.7231
Ziquala	T_453	Eragrostis tef	breeding_material	DZ-Cr-358	Hybridization	DZARC	1995	NA	NA	NA	NA	NA	NA	2	NA	NA	NA	NA	NA	NA	NA	NA	NA	NA	NA	NA	NA	NA	NA	NA	NA	NA	NA	NA	54.1505	59.5197	48.5081	107.595	107.349	106.311	79.2495	95.9996	67.4553	31.1295	37.9473	25.8751	22.5461	23.352	21.2833
Zobel	T_469	Eragrostis tef	breeding_material	DZ-01-1821	Selection	SARC	2005	NA	NA	NA	NA	NA	NA	2	NA	NA	NA	NA	NA	NA	NA	NA	NA	NA	NA	NA	NA	NA	NA	NA	NA	NA	NA	NA	53.9052	56.1765	51.4029	105.189	105.109	104.096	76.2154	93.7872	60.6415	30.8362	37.5054	25.4691	24.1442	26.4984	22.5732
	T_Ec1	Eragrostis curvula	wild	NA	NA	DZARC	NA	NA	NA	NA	NA	NA	NA	NA	NA	NA	NA	NA	NA	NA	NA	NA	NA	NA	NA	NA	NA	NA	NA	NA	NA	NA	NA	NA	NA	NA	NA	NA	NA	NA	NA	NA	NA	NA	NA	NA	NA	NA	NA
	T_Ec2	Eragrostis curvula	wild	NA	NA	DZARC	NA	NA	NA	NA	NA	NA	NA	NA	NA	NA	NA	NA	NA	NA	NA	NA	NA	NA	NA	NA	NA	NA	NA	NA	NA	NA	NA	NA	NA	NA	NA	NA	NA	NA	NA	NA	NA	NA	NA	NA	NA	NA	NA
	T_Ep1	Eragrostis pilosa	wild	NA	NA	DZARC/Ethiopia	NA	NA	NA	NA	NA	NA	NA	NA	NA	NA	NA	NA	NA	NA	NA	NA	NA	NA	NA	NA	NA	NA	NA	NA	NA	NA	NA	NA	NA	NA	NA	NA	NA	NA	NA	NA	NA	NA	NA	NA	NA	NA	NA
	T_Ep2	Eragrostis pilosa	wild	NA	NA	DZARC/Ethiopia	NA	NA	NA	NA	NA	NA	NA	NA	NA	NA	NA	NA	NA	NA	NA	NA	NA	NA	NA	NA	NA	NA	NA	NA	NA	NA	NA	NA	NA	NA	NA	NA	NA	NA	NA	NA	NA	NA	NA	NA	NA	NA	NA
Jima	T_J1	Eragrostis spp.	wild	NA	NA	DZARC/Ethiopia	NA	NA	NA	NA	NA	NA	NA	NA	NA	NA	NA	NA	NA	NA	NA	NA	NA	NA	NA	NA	NA	NA	NA	NA	NA	NA	NA	NA	NA	NA	NA	NA	NA	NA	NA	NA	NA	NA	NA	NA	NA	NA	NA
PI223260	T_PI1	Eragrostis pilosa	wild	PI223260	NA	DZARC/Afganistan	NA	NA	NA	NA	NA	NA	NA	NA	NA	NA	NA	NA	NA	NA	NA	NA	NA	NA	NA	NA	NA	NA	NA	NA	NA	NA	NA	NA	NA	NA	NA	NA	NA	NA	NA	NA	NA	NA	NA	NA	NA	NA	NA
PI223260	T_PI2	Eragrostis pilosa	wild	PI223260	NA	DZARC/Afganistan	NA	NA	NA	NA	NA	NA	NA	NA	NA	NA	NA	NA	NA	NA	NA	NA	NA	NA	NA	NA	NA	NA	NA	NA	NA	NA	NA	NA	NA	NA	NA	NA	NA	NA	NA	NA	NA	NA	NA	NA	NA	NA	NA
[truncated: 51 more columns]

## Sheet: Supplemental File 1B
SNP name	Chromosome	Position	Block name	Block start position	Blong end position	SNPs in block
10A_200099	10A	200099	NA	NA	NA	NA
10A_208593	10A	208593	NA	NA	NA	NA
10A_379785	10A	379785	NA	NA	NA	NA
10A_381686	10A	381686	B_929	381686	381701	2
10A_381701	10A	381701	B_929	381686	381701	2
10A_800200	10A	800200	B_930	800200	822474	3
10A_800292	10A	800292	B_930	800200	822474	3
10A_822439	10A	822439	B_930	800200	822474	3
10A_822474	10A	822474	B_930	800200	822474	3
10A_935469	10A	935469	NA	NA	NA	NA
10A_994536	10A	994536	NA	NA	NA	NA
10A_994843	10A	994843	NA	NA	NA	NA
10A_1001779	10A	1001779	NA	NA	NA	NA
10A_1024984	10A	1024984	B_931	1024984	1033659	5
10A_1024990	10A	1024990	B_931	1024984	1033659	5
10A_1025096	10A	1025096	B_931	1024984	1033659	5
10A_1025439	10A	1025439	B_931	1024984	1033659	5
10A_1033659	10A	1033659	B_931	1024984	1033659	5
10A_1033731	10A	1033731	NA	NA	NA	NA
10A_1034934	10A	1034934	NA	NA	NA	NA
10A_1360850	10A	1360850	NA	NA	NA	NA
10A_1374964	10A	1374964	NA	NA	NA	NA
10A_1398576	10A	1398576	NA	NA	NA	NA
10A_1398621	10A	1398621	NA	NA	NA	NA
10A_1446998	10A	1446998	NA	NA	NA	NA
10A_1497776	10A	1497776	B_932	1497776	1497803	2
10A_1497803	10A	1497803	B_932	1497776	1497803	2
10A_1583021	10A	1583021	NA	NA	NA	NA
10A_1589161	10A	1589161	NA	NA	NA	NA
10A_1680261	10A	1680261	NA	NA	NA	NA
10A_1921934	10A	1921934	NA	NA	NA	NA
10A_1924452	10A	1924452	NA	NA	NA	NA
10A_1924454	10A	1924454	NA	NA	NA	NA
10A_1988395	10A	1988395	B_933	1988395	1988475	3
10A_1988440	10A	1988440	B_933	1988395	1988475	3
10A_1988475	10A	1988475	B_933	1988395	1988475	3
10A_2034823	10A	2034823	NA	NA	NA	NA
10A_2035130	10A	2035130	NA	NA	NA	NA
10A_2063605	10A	2063605	NA	NA	NA	NA
10A_2066590	10A	2066590	NA	NA	NA	NA
10A_2066858	10A	2066858	NA	NA	NA	NA
10A_2081827	10A	2081827	NA	NA	NA	NA
10A_2124112	10A	2124112	NA	NA	NA	NA
10A_2124142	10A	2124142	NA	NA	NA	NA
10A_2124334	10A	2124334	NA	NA	NA	NA
10A_2124806	10A	2124806	NA	NA	NA	NA
10A_2124816	10A	2124816	NA	NA	NA	NA
10A_2133675	10A	2133675	NA	NA	NA	NA
10A_2133681	10A	2133681	NA	NA	NA	NA
10A_2133931	10A	2133931	NA	NA	NA	NA
10A_2133987	10A	2133987	NA	NA	NA	NA
10A_2143867	10A	2143867	NA	NA	NA	NA
10A_2163459	10A	2163459	B_934	2163459	2163718	3
10A_2163472	10A	2163472	B_934	2163459	2163718	3
10A_2163518	10A	2163518	B_934	2163459	2163718	3
10A_2163519	10A	2163519	B_934	2163459	2163718	3
10A_2163718	10A	2163718	B_934	2163459	2163718	3
10A_2163722	10A	2163722	NA	NA	NA	NA
10A_2163745	10A	2163745	NA	NA	NA	NA
10A_2317767	10A	2317767	NA	NA	NA	NA
10A_2332394	10A	2332394	NA	NA	NA	NA
10A_2541883	10A	2541883	B_935	2541883	2541967	8
10A_2541892	10A	2541892	B_935	2541883	2541967	8
10A_2541906	10A	2541906	B_935	2541883	2541967	8
10A_2541910	10A	2541910	B_935	2541883	2541967	8
10A_2541933	10A	2541933	B_935	2541883	2541967	8
10A_2541938	10A	2541938	B_935	2541883	2541967	8
10A_2541952	10A	2541952	B_935	2541883	2541967	8
10A_2541967	10A	2541967	B_935	2541883	2541967	8
10A_2656211	10A	2656211	NA	NA	NA	NA
10A_2691368	10A	2691368	B_936	2691368	2703860	2
10A_2703860	10A	2703860	B_936	2691368	2703860	2
10A_2796357	10A	2796357	NA	NA	NA	NA
10A_2809710	10A	2809710	NA	NA	NA	NA
10A_2809735	10A	2809735	B_937	2809735	2809744	2
10A_2809744	10A	2809744	B_937	2809735	2809744	2
10A_2868027	10A	2868027	NA	NA	NA	NA
10A_2930051	10A	2930051	B_938	2930051	3124491	7
10A_2959251	10A	2959251	B_938	2930051	3124491	7
10A_2980653	10A	2980653	B_938	2930051	3124491	7
10A_2986821	10A	2986821	B_938	2930051	3124491	7
10A_2986838	10A	2986838	B_938	2930051	3124491	7
10A_2986912	10A	2986912	B_938	2930051	3124491	7
10A_3033390	10A	3033390	B_938	2930051	3124491	7
10A_3040001	10A	3040001	B_938	2930051	3124491	7
10A_3124491	10A	3124491	B_938	2930051	3124491	7
10A_3165961	10A	3165961	NA	NA	NA	NA
10A_3250310	10A	3250310	B_939	3250310	3363731	6
10A_3250723	10A	3250723	B_939	3250310	3363731	6
10A_3255077	10A	3255077	B_939	3250310	3363731	6
10A_3282764	10A	3282764	B_939	3250310	3363731	6
10A_3363730	10A	3363730	B_939	3250310	3363731	6
10A_3363731	10A	3363731	B_939	3250310	3363731	6
10A_3363989	10A	3363989	B_940	3363989	3364020	2
10A_3364020	10A	3364020	B_940	3363989	3364020	2
10A_3412250	10A	3412250	NA	NA	NA	NA
10A_3412492	10A	3412492	NA	NA	NA	NA
10A_3417145	10A	3417145	B_941	3417145	3479094	5
10A_3417403	10A	3417403	B_941	3417145	3479094	5
10A_3417408	10A	3417408	B_941	3417145	3479094	5
10A_3417410	10A	3417410	B_941	3417145	3479094	5
10A_3417456	10A	3417456	B_941	3417145	3479094	5
10A_3428732	10A	3428732	B_941	3417145	3479094	5
10A_3463988	10A	3463988	B_941	3417145	3479094	5
10A_3464007	10A	3464007	B_941	3417145	3479094	5
10A_3464023	10A	3464023	B_941	3417145	3479094	5
10A_3464030	10A	3464030	B_941	3417145	3479094	5
10A_3479094	10A	3479094	B_941	3417145	3479094	5
10A_3479124	10A	3479124	NA	NA	NA	NA
10A_3479481	10A	3479481	B_942	3479481	3613023	5
10A_3489185	10A	3489185	B_942	3479481	3613023	5
10A_3495776	10A	3495776	B_942	3479481	3613023	5
10A_3495779	10A	3495779	B_942	3479481	3613023	5
10A_3495804	10A	3495804	B_942	3479481	3613023	5
10A_3496068	10A	3496068	B_942	3479481	3613023	5
10A_3613023	10A	3613023	B_942	3479481	3613023	5
10A_3635409	10A	3635409	NA	NA	NA	NA
10A_3694723	10A	3694723	B_943	3694723	3742259	5
10A_3695030	10A	3695030	B_943	3694723	3742259	5
10A_3695040	10A	3695040	B_943	3694723	3742259	5
10A_3728825	10A	3728825	B_943	3694723	3742259	5
10A_3742259	10A	3742259	B_943	3694723	3742259	5
10A_3789924	10A	3789924	NA	NA	NA	NA
10A_3835263	10A	3835263	NA	NA	NA	NA
10A_3835307	10A	3835307	NA	NA	NA	NA
10A_3844797	10A	3844797	NA	NA	NA	NA
10A_3845096	10A	3845096	NA	NA	NA	NA
10A_3904484	10A	3904484	NA	NA	NA	NA
10A_3904763	10A	3904763	NA	NA	NA	NA
10A_3943764	10A	3943764	B_944	3943764	3944087	2
10A_3944087	10A	3944087	B_944	3943764	3944087	2
10A_3944157	10A	3944157	NA	NA	NA	NA
10A_3970894	10A	3970894	B_945	3970894	3971146	6
10A_3970896	10A	3970896	B_945	3970894	3971146	6
10A_3970941	10A	3970941	B_945	3970894	3971146	6
10A_3970953	10A	3970953	B_945	3970894	3971146	6
10A_3971124	10A	3971124	B_945	3970894	3971146	6
10A_3971130	10A	3971130	B_945	3970894	3971146	6
10A_3971144	10A	3971144	B_945	3970894	3971146	6
10A_3971146	10A	3971146	B_945	3970894	3971146	6
10A_3975432	10A	3975432	B_946	3975432	4046504	8
10A_3975434	10A	3975434	B_946	3975432	4046504	8
10A_4005828	10A	4005828	B_946	3975432	4046504	8
10A_4005832	10A	4005832	B_946	3975432	4046504	8
10A_4015412	10A	4015412	B_946	3975432	4046504	8
10A_4015419	10A	4015419	B_946	3975432	4046504	8
10A_4046173	10A	4046173	B_946	3975432	4046504	8
10A_4046504	10A	4046504	B_946	3975432	4046504	8
10A_4050088	10A	4050088	NA	NA	NA	NA
10A_4129393	10A	4129393	NA	NA	NA	NA
10A_4227970	10A	4227970	NA	NA	NA	NA
10A_4228014	10A	4228014	NA	NA	NA	NA
10A_4359818	10A	4359818	NA	NA	NA	NA
10A_4370623	10A	4370623	NA	NA	NA	NA
10A_4520136	10A	4520136	NA	NA	NA	NA
10A_4824770	10A	4824770	NA	NA	NA	NA
10A_4993130	10A	4993130	NA	NA	NA	NA
10A_4993422	10A	4993422	B_947	4993422	4993463	3
10A_4993423	10A	4993423	B_947	4993422	4993463	3
10A_4993463	10A	4993463	B_947	4993422	4993463	3
10A_5141642	10A	5141642	NA	NA	NA	NA
10A_5166573	10A	5166573	NA	NA	NA	NA
10A_5191105	10A	5191105	B_948	5191105	5191403	2
10A_5191403	10A	5191403	B_948	5191105	5191403	2
10A_5343802	10A	5343802	NA	NA	NA	NA
10A_5430617	10A	5430617	NA	NA	NA	NA
10A_5475088	10A	5475088	NA	NA	NA	NA
10A_5544765	10A	5544765	NA	NA	NA	NA
10A_5621865	10A	5621865	NA	NA	NA	NA
10A_5622027	10A	5622027	NA	NA	NA	NA
10A_5622079	10A	5622079	NA	NA	NA	NA
10A_5797845	10A	5797845	NA	NA	NA	NA
10A_5904310	10A	5904310	B_949	5904310	5904319	3
10A_5904312	10A	5904312	B_949	5904310	5904319	3
10A_5904319	10A	5904319	B_949	5904310	5904319	3
10A_6241556	10A	6241556	NA	NA	NA	NA
10A_6427223	10A	6427223	NA	NA	NA	NA
10A_6599915	10A	6599915	NA	NA	NA	NA
10A_6683542	10A	6683542	NA	NA	NA	NA
10A_6732111	10A	6732111	NA	NA	NA	NA
10A_6776255	10A	6776255	NA	NA	NA	NA
10A_6856502	10A	6856502	NA	NA	NA	NA
10A_6873510	10A	6873510	NA	NA	NA	NA
10A_6915366	10A	6915366	B_950	6915366	7013994	10
10A_6945717	10A	6945717	B_950	6915366	7013994	10
10A_6946014	10A	6946014	B_950	6915366	7013994	10
10A_6954873	10A	6954873	B_950	6915366	7013994	10
10A_6969853	10A	6969853	B_950	6915366	7013994	10
10A_6970152	10A	6970152	B_950	6915366	7013994	10
10A_6974245	10A	6974245	B_950	6915366	7013994	10
10A_6974619	10A	6974619	B_950	6915366	7013994	10
10A_6974623	10A	6974623	B_950	6915366	7013994	10
10A_6989038	10A	6989038	B_950	6915366	7013994	10
10A_7013803	10A	7013803	B_950	6915366	7013994	10
10A_7013994	10A	7013994	B_950	6915366	7013994	10
10A_7054462	10A	7054462	NA	NA	NA	NA
10A_7078158	10A	7078158	NA	NA	NA	NA
10A_7078437	10A	7078437	B_951	7078437	7156445	8
10A_7093849	10A	7093849	B_951	7078437	7156445	8
10A_7121373	10A	7121373	B_951	7078437	7156445	8
10A_7121425	10A	7121425	B_951	7078437	7156445	8
10A_7125602	10A	7125602	B_951	7078437	7156445	8
10A_7134978	10A	7134978	B_951	7078437	7156445	8
10A_7135192	10A	7135192	B_951	7078437	7156445	8
10A_7156445	10A	7156445	B_951	7078437	7156445	8
10A_7336124	10A	7336124	NA	NA	NA	NA
10A_7336345	10A	7336345	NA	NA	NA	NA
10A_7343599	10A	7343599	NA	NA	NA	NA
10A_7343951	10A	7343951	NA	NA	NA	NA
10A_7415583	10A	7415583	B_952	7415583	7424426	4
10A_7415608	10A	7415608	B_952	7415583	7424426	4
10A_7415630	10A	7415630	B_952	7415583	7424426	4
10A_7415652	10A	7415652	B_952	7415583	7424426	4
10A_7424426	10A	7424426	B_952	7415583	7424426	4
10A_7451664	10A	7451664	NA	NA	NA	NA
10A_7499710	10A	7499710	NA	NA	NA	NA
10A_7511278	10A	7511278	NA	NA	NA	NA
10A_7566354	10A	7566354	NA	NA	NA	NA
10A_7669681	10A	7669681	NA	NA	NA	NA
10A_7670010	10A	7670010	B_953	7670010	7677541	3
10A_7670011	10A	7670011	B_953	7670010	7677541	3
10A_7677541	10A	7677541	B_953	7670010	7677541	3
10A_7699179	10A	7699179	B_954	7699179	7702890	3
10A_7699472	10A	7699472	B_954	7699179	7702890	3
10A_7702890	10A	7702890	B_954	7699179	7702890	3
10A_7702928	10A	7702928	B_955	7702928	7703185	2
10A_7703185	10A	7703185	B_955	7702928	7703185	2
10A_7757767	10A	7757767	NA	NA	NA	NA
10A_7757768	10A	7757768	NA	NA	NA	NA
10A_7826057	10A	7826057	NA	NA	NA	NA
10A_7870859	10A	7870859	B_956	7870859	7870929	2
10A_7870888	10A	7870888	B_956	7870859	7870929	2
10A_7870929	10A	7870929	B_956	7870859	7870929	2
10A_7886493	10A	7886493	NA	NA	NA	NA
10A_7919222	10A	7919222	NA	NA	NA	NA
10A_8088426	10A	8088426	B_957	8088426	8088484	4
10A_8088444	10A	8088444	B_957	8088426	8088484	4
10A_8088453	10A	8088453	B_957	8088426	8088484	4
10A_8088484	10A	8088484	B_957	8088426	8088484	4
10A_8108440	10A	8108440	NA	NA	NA	NA
10A_8109033	10A	8109033	NA	NA	NA	NA
10A_8113419	10A	8113419	NA	NA	NA	NA
10A_8131173	10A	8131173	B_958	8131173	8144290	2
10A_8136279	10A	8136279	B_958	8131173	8144290	2
10A_8136501	10A	8136501	B_958	8131173	8144290	2
10A_8144290	10A	8144290	B_958	8131173	8144290	2
10A_8205491	10A	8205491	NA	NA	NA	NA
10A_8252409	10A	8252409	NA	NA	NA	NA
10A_8252636	10A	8252636	NA	NA	NA	NA
10A_8268942	10A	8268942	B_959	8268942	8269232	3
10A_8268953	10A	8268953	B_959	8268942	8269232	3
10A_8269232	10A	8269232	B_959	8268942	8269232	3
10A_8412896	10A	8412896	NA	NA	NA	NA
10A_8413238	10A	8413238	NA	NA	NA	NA
10A_8413239	10A	8413239	NA	NA	NA	NA
10A_8452930	10A	8452930	B_960	8452930	8636764	6
10A_8453285	10A	8453285	B_960	8452930	8636764	6
10A_8453337	10A	8453337	B_960	8452930	8636764	6
10A_8510962	10A	8510962	B_960	8452930	8636764	6
10A_8511077	10A	8511077	B_960	8452930	8636764	6
10A_8511081	10A	8511081	B_960	8452930	8636764	6
10A_8511413	10A	8511413	B_960	8452930	8636764	6
10A_8530152	10A	8530152	B_960	8452930	8636764	6
10A_8569186	10A	8569186	B_960	8452930	8636764	6
10A_8632657	10A	8632657	B_960	8452930	8636764	6
10A_8632683	10A	8632683	B_960	8452930	8636764	6
10A_8633006	10A	8633006	B_960	8452930	8636764	6
10A_8636734	10A	8636734	B_960	8452930	8636764	6
10A_8636764	10A	8636764	B_960	8452930	8636764	6
10A_8636959	10A	8636959	NA	NA	NA	NA
10A_8658968	10A	8658968	NA	NA	NA	NA
10A_8803117	10A	8803117	NA	NA	NA	NA
10A_8828335	10A	8828335	NA	NA	NA	NA
10A_8872641	10A	8872641	NA	NA	NA	NA
10A_8889986	10A	8889986	B_961	8889986	8903497	4
10A_8890014	10A	8890014	B_961	8889986	8903497	4
10A_8903482	10A	8903482	B_961	8889986	8903497	4
10A_8903491	10A	8903491	B_961	8889986	8903497	4
10A_8903497	10A	8903497	B_961	8889986	8903497	4
10A_8943153	10A	8943153	NA	NA	NA	NA
10A_8954921	10A	8954921	NA	NA	NA	NA
10A_8961310	10A	8961310	B_962	8961310	9131769	7
10A_8961600	10A	8961600	B_962	8961310	9131769	7
10A_8984613	10A	8984613	B_962	8961310	9131769	7
10A_8984843	10A	8984843	B_962	8961310	9131769	7
10A_8984883	10A	8984883	B_962	8961310	9131769	7
10A_8985220	10A	8985220	B_962	8961310	9131769	7
10A_8985275	10A	8985275	B_962	8961310	9131769	7
10A_9131769	10A	9131769	B_962	8961310	9131769	7
10A_9301647	10A	9301647	NA	NA	NA	NA
10A_9485582	10A	9485582	NA	NA	NA	NA
10A_9556011	10A	9556011	B_963	9556011	9596727	5
10A_9556037	10A	9556037	B_963	9556011	9596727	5
10A_9568426	10A	9568426	B_963	9556011	9596727	5
10A_9568459	10A	9568459	B_963	9556011	9596727	5
10A_9568526	10A	9568526	B_963	9556011	9596727	5
10A_9568802	10A	9568802	B_963	9556011	9596727	5
10A_9593786	10A	9593786	B_963	9556011	9596727	5
10A_9596727	10A	9596727	B_963	9556011	9596727	5
10A_9803457	10A	9803457	NA	NA	NA	NA
10A_9834160	10A	9834160	NA	NA	NA	NA
10A_9834181	10A	9834181	NA	NA	NA	NA
10A_10153175	10A	10153175	NA	NA	NA	NA
10A_10263988	10A	10263988	B_964	10263988	10351779	18
10A_10264430	10A	10264430	B_964	10263988	10351779	18
10A_10264446	10A	10264446	B_964	10263988	10351779	18
10A_10265949	10A	10265949	B_964	10263988	10351779	18
10A_10266194	10A	10266194	B_964	10263988	10351779	18
10A_10282643	10A	10282643	B_964	10263988	10351779	18
10A_10282737	10A	10282737	B_964	10263988	10351779	18
10A_10282774	10A	10282774	B_964	10263988	10351779	18
10A_10283021	10A	10283021	B_964	10263988	10351779	18
10A_10284351	10A	10284351	B_964	10263988	10351779	18
10A_10285055	10A	10285055	B_964	10263988	10351779	18
10A_10289685	10A	10289685	B_964	10263988	10351779	18
10A_10295287	10A	10295287	B_964	10263988	10351779	18
10A_10295375	10A	10295375	B_964	10263988	10351779	18
10A_10300966	10A	10300966	B_964	10263988	10351779	18
10A_10302666	10A	10302666	B_964	10263988	10351779	18
10A_10302682	10A	10302682	B_964	10263988	10351779	18
10A_10303016	10A	10303016	B_964	10263988	10351779	18
10A_10303808	10A	10303808	B_964	10263988	10351779	18
10A_10303813	10A	10303813	B_964	10263988	10351779	18
10A_10331737	10A	10331737	B_964	10263988	10351779	18
10A_10331760	10A	10331760	B_964	10263988	10351779	18
10A_10332048	10A	10332048	B_964	10263988	10351779	18
10A_10351117	10A	10351117	B_964	10263988	10351779	18
10A_10351412	10A	10351412	B_964	10263988	10351779	18
10A_10351518	10A	10351518	B_964	10263988	10351779	18
10A_10351779	10A	10351779	B_964	10263988	10351779	18
10A_10362022	10A	10362022	NA	NA	NA	NA
10A_10362106	10A	10362106	NA	NA	NA	NA
10A_10385033	10A	10385033	B_965	10385033	10481108	9
10A_10385075	10A	10385075	B_965	10385033	10481108	9
10A_10467244	10A	10467244	B_965	10385033	10481108	9
10A_10467245	10A	10467245	B_965	10385033	10481108	9
10A_10467253	10A	10467253	B_965	10385033	10481108	9
10A_10467254	10A	10467254	B_965	10385033	10481108	9
10A_10467263	10A	10467263	B_965	10385033	10481108	9
10A_10467274	10A	10467274	B_965	10385033	10481108	9
10A_10467642	10A	10467642	B_965	10385033	10481108	9
10A_10467663	10A	10467663	B_965	10385033	10481108	9
10A_10481108	10A	10481108	B_965	10385033	10481108	9
10A_10627866	10A	10627866	NA	NA	NA	NA
10A_10627899	10A	10627899	NA	NA	NA	NA
10A_10628105	10A	10628105	NA	NA	NA	NA
10A_10628477	10A	10628477	NA	NA	NA	NA
10A_10658256	10A	10658256	NA	NA	NA	NA
10A_10672466	10A	10672466	NA	NA	NA	NA
10A_10672468	10A	10672468	NA	NA	NA	NA
10A_10672479	10A	10672479	NA	NA	NA	NA
10A_10676458	10A	10676458	NA	NA	NA	NA
10A_10694421	10A	10694421	NA	NA	NA	NA
10A_10734140	10A	10734140	NA	NA	NA	NA
10A_10890573	10A	10890573	NA	NA	NA	NA
10A_10890788	10A	10890788	NA	NA	NA	NA
10A_10890794	10A	10890794	NA	NA	NA	NA
10A_10902675	10A	10902675	NA	NA	NA	NA
10A_10903250	10A	10903250	NA	NA	NA	NA
10A_11181808	10A	11181808	NA	NA	NA	NA
10A_11344923	10A	11344923	NA	NA	NA	NA
10A_11345212	10A	11345212	NA	NA	NA	NA
10A_11417324	10A	11417324	NA	NA	NA	NA
10A_11767337	10A	11767337	NA	NA	NA	NA
10A_11767379	10A	11767379	NA	NA	NA	NA
10A_12057470	10A	12057470	NA	NA	NA	NA
10A_12075374	10A	12075374	NA	NA	NA	NA
10A_12109845	10A	12109845	NA	NA	NA	NA
10A_12109894	10A	12109894	NA	NA	NA	NA
10A_12170132	10A	12170132	NA	NA	NA	NA
10A_12362120	10A	12362120	NA	NA	NA	NA
10A_12421548	10A	12421548	NA	NA	NA	NA
10A_12642238	10A	12642238	NA	NA	NA	NA
10A_12796150	10A	12796150	NA	NA	NA	NA
10A_13123514	10A	13123514	NA	NA	NA	NA
10A_13215893	10A	13215893	NA	NA	NA	NA
10A_13293655	10A	13293655	NA	NA	NA	NA
10A_13293682	10A	13293682	NA	NA	NA	NA
10A_13316739	10A	13316739	NA	NA	NA	NA
10A_13469074	10A	13469074	NA	NA	NA	NA
10A_13486269	10A	13486269	NA	NA	NA	NA
10A_14053470	10A	14053470	NA	NA	NA	NA
10A_14234071	10A	14234071	NA	NA	NA	NA
10A_14234092	10A	14234092	NA	NA	NA	NA
10A_14447492	10A	14447492	NA	NA	NA	NA
10A_14706864	10A	14706864	NA	NA	NA	NA
10A_14706877	10A	14706877	NA	NA	NA	NA
10A_14735978	10A	14735978	NA	NA	NA	NA
10A_14915621	10A	14915621	NA	NA	NA	NA
10A_14934501	10A	14934501	NA	NA	NA	NA
10A_15072632	10A	15072632	NA	NA	NA	NA
10A_15144689	10A	15144689	NA	NA	NA	NA
10A_15145021	10A	15145021	NA	NA	NA	NA
10A_15328323	10A	15328323	NA	NA	NA	NA
10A_15999626	10A	15999626	NA	NA	NA	NA
10A_16464177	10A	16464177	NA	NA	NA	NA
10A_16685587	10A	16685587	NA	NA	NA	NA
10A_16724110	10A	16724110	B_966	16724110	16724152	2
10A_16724152	10A	16724152	B_966	16724110	16724152	2
10A_16778815	10A	16778815	NA	NA	NA	NA
10A_16778845	10A	16778845	NA	NA	NA	NA
10A_16779101	10A	16779101	NA	NA	NA	NA
10A_16779132	10A	16779132	NA	NA	NA	NA
10A_16779141	10A	16779141	NA	NA	NA	NA
10A_16779145	10A	16779145	NA	NA	NA	NA
10A_16938869	10A	16938869	NA	NA	NA	NA
10A_17234379	10A	17234379	NA	NA	NA	NA
10A_17234592	10A	17234592	NA	NA	NA	NA
10A_17234618	10A	17234618	NA	NA	NA	NA
10A_17301985	10A	17301985	NA	NA	NA	NA
10A_17387060	10A	17387060	NA	NA	NA	NA
10A_17395068	10A	17395068	NA	NA	NA	NA
10A_17395713	10A	17395713	NA	NA	NA	NA
10A_17508244	10A	17508244	NA	NA	NA	NA
10A_17508255	10A	17508255	NA	NA	NA	NA
10A_17508269	10A	17508269	NA	NA	NA	NA
10A_17508611	10A	17508611	NA	NA	NA	NA
10A_17683602	10A	17683602	NA	NA	NA	NA
10A_17824571	10A	17824571	B_967	17824571	17920297	8
10A_17898488	10A	17898488	B_967	17824571	17920297	8
10A_17898550	10A	17898550	B_967	17824571	17920297	8
10A_17898808	10A	17898808	B_967	17824571	17920297	8
10A_17901757	10A	17901757	B_967	17824571	17920297	8
10A_17907134	10A	17907134	B_967	17824571	17920297	8
10A_17907382	10A	17907382	B_967	17824571	17920297	8
10A_17920297	10A	17920297	B_967	17824571	17920297	8
10A_18060790	10A	18060790	NA	NA	NA	NA
10A_18097805	10A	18097805	NA	NA	NA	NA
10A_18098056	10A	18098056	NA	NA	NA	NA
10A_18138753	10A	18138753	B_968	18138753	18138773	2
10A_18138773	10A	18138773	B_968	18138753	18138773	2
10A_18149229	10A	18149229	B_969	18149229	18149278	3
10A_18149246	10A	18149246	B_969	18149229	18149278	3
10A_18149278	10A	18149278	B_969	18149229	18149278	3
10A_18201944	10A	18201944	NA	NA	NA	NA
10A_18240835	10A	18240835	B_970	18240835	18240855	2
10A_18240855	10A	18240855	B_970	18240835	18240855	2
10A_18322959	10A	18322959	NA	NA	NA	NA
10A_18398501	10A	18398501	NA	NA	NA	NA
10A_18475903	10A	18475903	NA	NA	NA	NA
10A_18865669	10A	18865669	NA	NA	NA	NA
10A_18893989	10A	18893989	NA	NA	NA	NA
10A_18933387	10A	18933387	NA	NA	NA	NA
10A_19088298	10A	19088298	NA	NA	NA	NA
10A_19088744	10A	19088744	NA	NA	NA	NA
10A_19347511	10A	19347511	NA	NA	NA	NA
10A_19771626	10A	19771626	NA	NA	NA	NA
10A_19805968	10A	19805968	NA	NA	NA	NA
10A_20091566	10A	20091566	B_971	20091566	20125055	7
10A_20098738	10A	20098738	B_971	20091566	20125055	7
10A_20098741	10A	20098741	B_971	20091566	20125055	7
10A_20098771	10A	20098771	B_971	20091566	20125055	7
10A_20098773	10A	20098773	B_971	20091566	20125055	7
10A_20098796	10A	20098796	B_971	20091566	20125055	7
10A_20099022	10A	20099022	B_971	20091566	20125055	7
10A_20125055	10A	20125055	B_971	20091566	20125055	7
10A_20173450	10A	20173450	NA	NA	NA	NA
10A_20309709	10A	20309709	NA	NA	NA	NA
10A_20312247	10A	20312247	B_972	20312247	20437315	13
10A_20312262	10A	20312262	B_972	20312247	20437315	13
10A_20312495	10A	20312495	B_972	20312247	20437315	13
10A_20312586	10A	20312586	B_972	20312247	20437315	13
10A_20318108	10A	20318108	B_972	20312247	20437315	13
10A_20318342	10A	20318342	B_972	20312247	20437315	13
10A_20353553	10A	20353553	B_972	20312247	20437315	13
10A_20362657	10A	20362657	B_972	20312247	20437315	13
10A_20387976	10A	20387976	B_972	20312247	20437315	13
10A_20424052	10A	20424052	B_972	20312247	20437315	13
10A_20424326	10A	20424326	B_972	20312247	20437315	13
10A_20424341	10A	20424341	B_972	20312247	20437315	13
10A_20436672	10A	20436672	B_972	20312247	20437315	13
10A_20436722	10A	20436722	B_972	20312247	20437315	13
10A_20437099	10A	20437099	B_972	20312247	20437315	13
10A_20437100	10A	20437100	B_972	20312247	20437315	13
10A_20437133	10A	20437133	B_972	20312247	20437315	13
10A_20437279	10A	20437279	B_972	20312247	20437315	13
10A_20437315	10A	20437315	B_972	20312247	20437315	13
10A_20443512	10A	20443512	NA	NA	NA	NA
10A_20451510	10A	20451510	B_973	20451510	20451873	9
10A_20451516	10A	20451516	B_973	20451510	20451873	9
10A_20451541	10A	20451541	B_973	20451510	20451873	9
10A_20451544	10A	20451544	B_973	20451510	20451873	9
10A_20451550	10A	20451550	B_973	20451510	20451873	9
10A_20451556	10A	20451556	B_973	20451510	20451873	9
10A_20451816	10A	20451816	B_973	20451510	20451873	9
10A_20451834	10A	20451834	B_973	20451510	20451873	9
10A_20451872	10A	20451872	B_973	20451510	20451873	9
10A_20451873	10A	20451873	B_973	20451510	20451873	9
10A_20533932	10A	20533932	NA	NA	NA	NA
10A_20568140	10A	20568140	NA	NA	NA	NA
10A_20845267	10A	20845267	NA	NA	NA	NA
10A_20947312	10A	20947312	NA	NA	NA	NA
10A_20947314	10A	20947314	NA	NA	NA	NA
10A_20948975	10A	20948975	NA	NA	NA	NA
10A_21051893	10A	21051893	NA	NA	NA	NA
10A_21070773	10A	21070773	NA	NA	NA	NA
10A_21144864	10A	21144864	NA	NA	NA	NA
10A_21144882	10A	21144882	NA	NA	NA	NA
10A_21145155	10A	21145155	NA	NA	NA	NA
10A_21196866	10A	21196866	NA	NA	NA	NA
10A_21196924	10A	21196924	NA	NA	NA	NA
10A_21267696	10A	21267696	NA	NA	NA	NA
10A_21311552	10A	21311552	B_974	21311552	21311553	2
10A_21311553	10A	21311553	B_974	21311552	21311553	2
10A_21329913	10A	21329913	NA	NA	NA	NA
10A_21339882	10A	21339882	B_975	21339882	21414183	7
10A_21339892	10A	21339892	B_975	21339882	21414183	7
10A_21340144	10A	21340144	B_975	21339882	21414183	7
10A_21379206	10A	21379206	B_975	21339882	21414183	7
10A_21379224	10A	21379224	B_975	21339882	21414183	7
10A_21379245	10A	21379245	B_975	21339882	21414183	7
10A_21379496	10A	21379496	B_975	21339882	21414183	7
10A_21413915	10A	21413915	B_975	21339882	21414183	7
10A_21414183	10A	21414183	B_975	21339882	21414183	7
10A_21415564	10A	21415564	NA	NA	NA	NA
10A_21496512	10A	21496512	NA	NA	NA	NA
10A_21544208	10A	21544208	NA	NA	NA	NA
10A_21608532	10A	21608532	NA	NA	NA	NA
10A_21667922	10A	21667922	B_976	21667922	21668230	3
10A_21667970	10A	21667970	B_976	21667922	21668230	3
10A_21668192	10A	21668192	B_976	21667922	21668230	3
10A_21668230	10A	21668230	B_976	21667922	21668230	3
10A_21722495	10A	21722495	B_977	21722495	21734101	3
10A_21734080	10A	21734080	B_977	21722495	21734101	3
10A_21734101	10A	21734101	B_977	21722495	21734101	3
10A_22115141	10A	22115141	NA	NA	NA	NA
10A_22137166	10A	22137166	NA	NA	NA	NA
10A_22166334	10A	22166334	NA	NA	NA	NA
10A_22169521	10A	22169521	NA	NA	NA	NA
10A_22228431	10A	22228431	NA	NA	NA	NA
10A_22403863	10A	22403863	NA	NA	NA	NA
10A_22533792	10A	22533792	NA	NA	NA	NA
10A_22542843	10A	22542843	NA	NA	NA	NA
10A_22556897	10A	22556897	NA	NA	NA	NA
10A_22589762	10A	22589762	B_978	22589762	22589824	2
10A_22589824	10A	22589824	B_978	22589762	22589824	2
10A_22621962	10A	22621962	B_979	22621962	22622283	3
10A_22622249	10A	22622249	B_979	22621962	22622283	3
10A_22622283	10A	22622283	B_979	22621962	22622283	3
10A_22633978	10A	22633978	B_980	22633978	22634008	2
10A_22634008	10A	22634008	B_980	22633978	22634008	2
10A_22691789	10A	22691789	B_981	22691789	22692056	3
10A_22691857	10A	22691857	B_981	22691789	22692056	3
10A_22692056	10A	22692056	B_981	22691789	22692056	3
10A_22801448	10A	22801448	B_982	22801448	22808621	3
10A_22801479	10A	22801479	B_982	22801448	22808621	3
10A_22808361	10A	22808361	B_982	22801448	22808621	3
10A_22808621	10A	22808621	B_982	22801448	22808621	3
10A_22867568	10A	22867568	NA	NA	NA	NA
10A_22867570	10A	22867570	NA	NA	NA	NA
10A_22867610	10A	22867610	B_983	22867610	22867628	2
10A_22867628	10A	22867628	B_983	22867610	22867628	2
10A_22973700	10A	22973700	NA	NA	NA	NA
10A_23041776	10A	23041776	NA	NA	NA	NA
10A_23107787	10A	23107787	NA	NA	NA	NA
10A_23108103	10A	23108103	B_984	23108103	23108116	2
10A_23108108	10A	23108108	B_984	23108103	23108116	2
10A_23108116	10A	23108116	B_984	23108103	23108116	2
10A_23108140	10A	23108140	NA	NA	NA	NA
10A_23114805	10A	23114805	NA	NA	NA	NA
10A_23157666	10A	23157666	NA	NA	NA	NA
10A_23181010	10A	23181010	NA	NA	NA	NA
10A_23244221	10A	23244221	NA	NA	NA	NA
10A_23244490	10A	23244490	NA	NA	NA	NA
10A_23244491	10A	23244491	NA	NA	NA	NA
10A_23261645	10A	23261645	NA	NA	NA	NA
10A_23299163	10A	23299163	NA	NA	NA	NA
10A_23299243	10A	23299243	NA	NA	NA	NA
10A_23299445	10A	23299445	NA	NA	NA	NA
10A_23299452	10A	23299452	NA	NA	NA	NA
10A_23299524	10A	23299524	NA	NA	NA	NA
10A_23299525	10A	23299525	NA	NA	NA	NA
10A_23310400	10A	23310400	NA	NA	NA	NA
10A_23398575	10A	23398575	NA	NA	NA	NA
10A_23398594	10A	23398594	NA	NA	NA	NA
10A_23398599	10A	23398599	NA	NA	NA	NA
10A_23398608	10A	23398608	NA	NA	NA	NA
10A_23398617	10A	23398617	NA	NA	NA	NA
10A_23398622	10A	23398622	NA	NA	NA	NA
10A_23398658	10A	23398658	NA	NA	NA	NA
10A_23398666	10A	23398666	NA	NA	NA	NA
10A_23413277	10A	23413277	NA	NA	NA	NA
10A_23542472	10A	23542472	NA	NA	NA	NA
10A_23566769	10A	23566769	NA	NA	NA	NA
10B_300071	10B	300071	NA	NA	NA	NA
10B_300315	10B	300315	NA	NA	NA	NA
10B_300317	10B	300317	NA	NA	NA	NA
10B_300331	10B	300331	NA	NA	NA	NA
10B_300345	10B	300345	NA	NA	NA	NA
10B_300370	10B	300370	NA	NA	NA	NA
10B_372643	10B	372643	NA	NA	NA	NA
10B_402855	10B	402855	NA	NA	NA	NA
10B_410960	10B	410960	B_1149	410960	411171	2
10B_411171	10B	411171	B_1149	410960	411171	2
10B_450032	10B	450032	B_1150	450032	456184	2
10B_450037	10B	450037	B_1150	450032	456184	2
10B_456184	10B	456184	B_1150	450032	456184	2
10B_538569	10B	538569	NA	NA	NA	NA
10B_637045	10B	637045	B_1151	637045	637304	2
10B_637304	10B	637304	B_1151	637045	637304	2
10B_703445	10B	703445	B_1152	703445	787654	4
10B_703460	10B	703460	B_1152	703445	787654	4
10B_787361	10B	787361	B_1152	703445	787654	4
10B_787654	10B	787654	B_1152	703445	787654	4
10B_851629	10B	851629	NA	NA	NA	NA
10B_851668	10B	851668	NA	NA	NA	NA
10B_942700	10B	942700	NA	NA	NA	NA
10B_942740	10B	942740	NA	NA	NA	NA
10B_942755	10B	942755	NA	NA	NA	NA
10B_942765	10B	942765	NA	NA	NA	NA
10B_943006	10B	943006	NA	NA	NA	NA
10B_1024249	10B	1024249	B_1153	1024249	1024327	2
10B_1024327	10B	1024327	B_1153	1024249	1024327	2
10B_1173413	10B	1173413	NA	NA	NA	NA
10B_1200537	10B	1200537	NA	NA	NA	NA
10B_1251644	10B	1251644	NA	NA	NA	NA
10B_1367925	10B	1367925	NA	NA	NA	NA
10B_1608476	10B	1608476	NA	NA	NA	NA
10B_1645699	10B	1645699	NA	NA	NA	NA
10B_1645914	10B	1645914	NA	NA	NA	NA
10B_1645929	10B	1645929	NA	NA	NA	NA
10B_1651408	10B	1651408	NA	NA	NA	NA
10B_1687206	10B	1687206	NA	NA	NA	NA
10B_1687214	10B	1687214	NA	NA	NA	NA
10B_1687421	10B	1687421	NA	NA	NA	NA
10B_1721660	10B	1721660	NA	NA	NA	NA
10B_1796060	10B	1796060	NA	NA	NA	NA
10B_1916882	10B	1916882	NA	NA	NA	NA
10B_1917244	10B	1917244	NA	NA	NA	NA
10B_2023954	10B	2023954	NA	NA	NA	NA
10B_2052405	10B	2052405	NA	NA	NA	NA
10B_2052420	10B	2052420	NA	NA	NA	NA
10B_2052468	10B	2052468	NA	NA	NA	NA
10B_2052469	10B	2052469	NA	NA	NA	NA
10B_2201806	10B	2201806	B_1154	2201806	2220670	5
10B_2201811	10B	2201811	B_1154	2201806	2220670	5
10B_2220640	10B	2220640	B_1154	2201806	2220670	5
10B_2220643	10B	2220643	B_1154	2201806	2220670	5
10B_2220670	10B	2220670	B_1154	2201806	2220670	5
10B_2223635	10B	2223635	NA	NA	NA	NA
10B_2225664	10B	2225664	B_1155	2225664	2225688	2
10B_2225688	10B	2225688	B_1155	2225664	2225688	2
10B_2225944	10B	2225944	B_1156	2225944	2225951	2
10B_2225951	10B	2225951	B_1156	2225944	2225951	2
10B_2296073	10B	2296073	NA	NA	NA	NA
10B_2337878	10B	2337878	B_1157	2337878	2364083	6
10B_2337942	10B	2337942	B_1157	2337878	2364083	6
10B_2338139	10B	2338139	B_1157	2337878	2364083	6
10B_2353486	10B	2353486	B_1157	2337878	2364083	6
10B_2353516	10B	2353516	B_1157	2337878	2364083	6
10B_2363866	10B	2363866	B_1157	2337878	2364083	6
10B_2363881	10B	2363881	B_1157	2337878	2364083	6
10B_2364083	10B	2364083	B_1157	2337878	2364083	6
10B_2388775	10B	2388775	B_1158	2388775	2388818	2
10B_2388818	10B	2388818	B_1158	2388775	2388818	2
10B_2421833	10B	2421833	NA	NA	NA	NA
10B_2456018	10B	2456018	NA	NA	NA	NA
10B_2465587	10B	2465587	NA	NA	NA	NA
10B_2584933	10B	2584933	NA	NA	NA	NA
10B_2584935	10B	2584935	NA	NA	NA	NA
10B_2585158	10B	2585158	B_1159	2585158	2628253	5
10B_2585222	10B	2585222	B_1159	2585158	2628253	5
10B_2585946	10B	2585946	B_1159	2585158	2628253	5
10B_2585969	10B	2585969	B_1159	2585158	2628253	5
10B_2601770	10B	2601770	B_1159	2585158	2628253	5
10B_2628253	10B	2628253	B_1159	2585158	2628253	5
10B_2628432	10B	2628432	NA	NA	NA	NA
10B_2851728	10B	2851728	NA	NA	NA	NA
10B_3063391	10B	3063391	NA	NA	NA	NA
10B_3079393	10B	3079393	NA	NA	NA	NA
10B_3089554	10B	3089554	NA	NA	NA	NA
10B_3089578	10B	3089578	NA	NA	NA	NA
10B_3106714	10B	3106714	NA	NA	NA	NA
10B_3106754	10B	3106754	NA	NA	NA	NA
10B_3119232	10B	3119232	NA	NA	NA	NA
10B_3394793	10B	3394793	NA	NA	NA	NA
10B_3622468	10B	3622468	NA	NA	NA	NA
10B_3926620	10B	3926620	B_1160	3926620	3926930	2
10B_3926930	10B	3926930	B_1160	3926620	3926930	2
10B_3926931	10B	3926931	NA	NA	NA	NA
10B_4278251	10B	4278251	NA	NA	NA	NA
10B_4312121	10B	4312121	NA	NA	NA	NA
10B_4547070	10B	4547070	NA	NA	NA	NA
10B_4735642	10B	4735642	NA	NA	NA	NA
10B_4750747	10B	4750747	NA	NA	NA	NA
10B_4869323	10B	4869323	NA	NA	NA	NA
10B_4869624	10B	4869624	NA	NA	NA	NA
10B_4922209	10B	4922209	B_1161	4922209	4922512	3
10B_4922256	10B	4922256	B_1161	4922209	4922512	3
10B_4922512	10B	4922512	B_1161	4922209	4922512	3
10B_4978473	10B	4978473	NA	NA	NA	NA
10B_5114724	10B	5114724	NA	NA	NA	NA
10B_5116246	10B	5116246	NA	NA	NA	NA
10B_5172023	10B	5172023	B_1162	5172023	5172278	2
10B_5172278	10B	5172278	B_1162	5172023	5172278	2
10B_5193028	10B	5193028	NA	NA	NA	NA
10B_5231015	10B	5231015	B_1163	5231015	5410867	13
10B_5236289	10B	5236289	B_1163	5231015	5410867	13
10B_5303733	10B	5303733	B_1163	5231015	5410867	13
10B_5304006	10B	5304006	B_1163	5231015	5410867	13
10B_5304025	10B	5304025	B_1163	5231015	5410867	13
10B_5304052	10B	5304052	B_1163	5231015	5410867	13
10B_5304053	10B	5304053	B_1163	5231015	5410867	13
10B_5304096	10B	5304096	B_1163	5231015	5410867	13
10B_5304113	10B	5304113	B_1163	5231015	5410867	13
10B_5304409	10B	5304409	B_1163	5231015	5410867	13
10B_5304457	10B	5304457	B_1163	5231015	5410867	13
10B_5304461	10B	5304461	B_1163	5231015	5410867	13
10B_5304486	10B	5304486	B_1163	5231015	5410867	13
10B_5334971	10B	5334971	B_1163	5231015	5410867	13
10B_5410867	10B	5410867	B_1163	5231015	5410867	13
10B_5553650	10B	5553650	NA	NA	NA	NA
10B_5796635	10B	5796635	NA	NA	NA	NA
10B_5851584	10B	5851584	NA	NA	NA	NA
10B_5894060	10B	5894060	NA	NA	NA	NA
10B_5894070	10B	5894070	NA	NA	NA	NA
10B_5894071	10B	5894071	NA	NA	NA	NA
10B_5898007	10B	5898007	NA	NA	NA	NA
10B_5898230	10B	5898230	NA	NA	NA	NA
10B_5906091	10B	5906091	NA	NA	NA	NA
10B_5927965	10B	5927965	NA	NA	NA	NA
10B_5949625	10B	5949625	B_1164	5949625	5949684	4
10B_5949654	10B	5949654	B_1164	5949625	5949684	4
10B_5949668	10B	5949668	B_1164	5949625	5949684	4
10B_5949684	10B	5949684	B_1164	5949625	5949684	4
10B_6002104	10B	6002104	B_1165	6002104	6006994	5
10B_6002292	10B	6002292	B_1165	6002104	6006994	5
10B_6006676	10B	6006676	B_1165	6002104	6006994	5
10B_6006858	10B	6006858	B_1165	6002104	6006994	5
10B_6006994	10B	6006994	B_1165	6002104	6006994	5
10B_6096677	10B	6096677	NA	NA	NA	NA
10B_6194228	10B	6194228	NA	NA	NA	NA
10B_6475152	10B	6475152	NA	NA	NA	NA
10B_6584340	10B	6584340	NA	NA	NA	NA
10B_6773904	10B	6773904	NA	NA	NA	NA
10B_6944635	10B	6944635	NA	NA	NA	NA
10B_6944642	10B	6944642	NA	NA	NA	NA
10B_7109116	10B	7109116	NA	NA	NA	NA
10B_7164428	10B	7164428	NA	NA	NA	NA
10B_7420802	10B	7420802	NA	NA	NA	NA
10B_7448638	10B	7448638	NA	NA	NA	NA
10B_7480704	10B	7480704	NA	NA	NA	NA
10B_7541540	10B	7541540	NA	NA	NA	NA
10B_7541670	10B	7541670	NA	NA	NA	NA
10B_7642597	10B	7642597	NA	NA	NA	NA
10B_7655350	10B	7655350	NA	NA	NA	NA
10B_7655363	10B	7655363	NA	NA	NA	NA
10B_7754261	10B	7754261	NA	NA	NA	NA
10B_7754270	10B	7754270	NA	NA	NA	NA
10B_7754547	10B	7754547	NA	NA	NA	NA
10B_7755830	10B	7755830	NA	NA	NA	NA
10B_7755854	10B	7755854	NA	NA	NA	NA
10B_7813200	10B	7813200	NA	NA	NA	NA
10B_7833087	10B	7833087	NA	NA	NA	NA
10B_7919080	10B	7919080	NA	NA	NA	NA
10B_7939528	10B	7939528	NA	NA	NA	NA
10B_7970398	10B	7970398	NA	NA	NA	NA
10B_8045267	10B	8045267	NA	NA	NA	NA
10B_8086754	10B	8086754	NA	NA	NA	NA
10B_8149040	10B	8149040	NA	NA	NA	NA
10B_8190341	10B	8190341	NA	NA	NA	NA
10B_8205707	10B	8205707	NA	NA	NA	NA
10B_8236944	10B	8236944	NA	NA	NA	NA
10B_8236952	10B	8236952	NA	NA	NA	NA
10B_8239107	10B	8239107	NA	NA	NA	NA
10B_8239156	10B	8239156	NA	NA	NA	NA
10B_8239168	10B	8239168	NA	NA	NA	NA
10B_8239838	10B	8239838	NA	NA	NA	NA
10B_8423463	10B	8423463	NA	NA	NA	NA
10B_8453554	10B	8453554	NA	NA	NA	NA
10B_8453885	10B	8453885	NA	NA	NA	NA
10B_8454230	10B	8454230	NA	NA	NA	NA
10B_8454244	10B	8454244	NA	NA	NA	NA
10B_8454254	10B	8454254	NA	NA	NA	NA
10B_8454274	10B	8454274	NA	NA	NA	NA
10B_8454276	10B	8454276	NA	NA	NA	NA
10B_8488337	10B	8488337	NA	NA	NA	NA
10B_8638580	10B	8638580	NA	NA	NA	NA
10B_8735407	10B	8735407	NA	NA	NA	NA
10B_8783812	10B	8783812	NA	NA	NA	NA
10B_8812495	10B	8812495	NA	NA	NA	NA
10B_8889705	10B	8889705	NA	NA	NA	NA
10B_8963272	10B	8963272	NA	NA	NA	NA
10B_8977919	10B	8977919	B_1166	8977919	9126461	5
10B_8978277	10B	8978277	B_1166	8977919	9126461	5
10B_8985237	10B	8985237	B_1166	8977919	9126461	5
10B_8985278	10B	8985278	B_1166	8977919	9126461	5
10B_9126378	10B	9126378	B_1166	8977919	9126461	5
10B_9126461	10B	9126461	B_1166	8977919	9126461	5
10B_9128119	10B	9128119	NA	NA	NA	NA
10B_9141246	10B	9141246	B_1167	9141246	9189811	6
10B_9141334	10B	9141334	B_1167	9141246	9189811	6
10B_9170933	10B	9170933	B_1167	9141246	9189811	6
10B_9171200	10B	9171200	B_1167	9141246	9189811	6
10B_9187874	10B	9187874	B_1167	9141246	9189811	6
10B_9188207	10B	9188207	B_1167	9141246	9189811	6
10B_9189811	10B	9189811	B_1167	9141246	9189811	6
10B_9484252	10B	9484252	NA	NA	NA	NA
10B_9568690	10B	9568690	B_1168	9568690	9755098	7
10B_9570447	10B	9570447	B_1168	9568690	9755098	7
10B_9583155	10B	9583155	B_1168	9568690	9755098	7
10B_9583195	10B	9583195	B_1168	9568690	9755098	7
10B_9584639	10B	9584639	B_1168	9568690	9755098	7
10B_9584641	10B	9584641	B_1168	9568690	9755098	7
10B_9584657	10B	9584657	B_1168	9568690	9755098	7
10B_9755098	10B	9755098	B_1168	9568690	9755098	7
10B_9755120	10B	9755120	NA	NA	NA	NA
10B_9755346	10B	9755346	B_1169	9755346	9866827	8
10B_9756325	10B	9756325	B_1169	9755346	9866827	8
10B_9800907	10B	9800907	B_1169	9755346	9866827	8
10B_9831694	10B	9831694	B_1169	9755346	9866827	8
10B_9856550	10B	9856550	B_1169	9755346	9866827	8
10B_9856551	10B	9856551	B_1169	9755346	9866827	8
10B_9856785	10B	9856785	B_1169	9755346	9866827	8
10B_9856834	10B	9856834	B_1169	9755346	9866827	8
10B_9866744	10B	9866744	B_1169	9755346	9866827	8
10B_9866827	10B	9866827	B_1169	9755346	9866827	8
10B_9866828	10B	9866828	NA	NA	NA	NA
10B_9913606	10B	9913606	B_1170	9913606	9973134	7
10B_9949649	10B	9949649	B_1170	9913606	9973134	7
10B_9949688	10B	9949688	B_1170	9913606	9973134	7
10B_9949966	10B	9949966	B_1170	9913606	9973134	7
10B_9950000	10B	9950000	B_1170	9913606	9973134	7
10B_9950327	10B	9950327	B_1170	9913606	9973134	7
10B_9950331	10B	9950331	B_1170	9913606	9973134	7
10B_9972838	10B	9972838	B_1170	9913606	9973134	7
10B_9973134	10B	9973134	B_1170	9913606	9973134	7
10B_10027653	10B	10027653	NA	NA	NA	NA
10B_10070671	10B	10070671	NA	NA	NA	NA
10B_10071042	10B	10071042	NA	NA	NA	NA
10B_10097073	10B	10097073	B_1171	10097073	10247598	12
10B_10134895	10B	10134895	B_1171	10097073	10247598	12
10B_10134898	10B	10134898	B_1171	10097073	10247598	12
10B_10134917	10B	10134917	B_1171	10097073	10247598	12
10B_10191839	10B	10191839	B_1171	10097073	10247598	12
10B_10199765	10B	10199765	B_1171	10097073	10247598	12
10B_10199794	10B	10199794	B_1171	10097073	10247598	12
10B_10215153	10B	10215153	B_1171	10097073	10247598	12
10B_10215448	10B	10215448	B_1171	10097073	10247598	12
10B_10215479	10B	10215479	B_1171	10097073	10247598	12
10B_10215522	10B	10215522	B_1171	10097073	10247598	12
10B_10247598	10B	10247598	B_1171	10097073	10247598	12
10B_10247643	10B	10247643	B_1172	10247643	10247649	2
10B_10247649	10B	10247649	B_1172	10247643	10247649	2
10B_10259444	10B	10259444	NA	NA	NA	NA
10B_10286080	10B	10286080	NA	NA	NA	NA
10B_10286388	10B	10286388	NA	NA	NA	NA
10B_10332082	10B	10332082	NA	NA	NA	NA
10B_10548058	10B	10548058	B_1173	10548058	10549559	2
10B_10549559	10B	10549559	B_1173	10548058	10549559	2
10B_10549643	10B	10549643	NA	NA	NA	NA
10B_10549902	10B	10549902	NA	NA	NA	NA
10B_10584886	10B	10584886	NA	NA	NA	NA
10B_10646666	10B	10646666	NA	NA	NA	NA
10B_10742837	10B	10742837	NA	NA	NA	NA
10B_10751473	10B	10751473	NA	NA	NA	NA
10B_10793726	10B	10793726	NA	NA	NA	NA
10B_11161037	10B	11161037	NA	NA	NA	NA
10B_11238488	10B	11238488	NA	NA	NA	NA
10B_11272391	10B	11272391	NA	NA	NA	NA
10B_11458588	10B	11458588	NA	NA	NA	NA
10B_11458800	10B	11458800	NA	NA	NA	NA
10B_11801177	10B	11801177	NA	NA	NA	NA
10B_11834052	10B	11834052	NA	NA	NA	NA
10B_11834089	10B	11834089	NA	NA	NA	NA
10B_11851354	10B	11851354	NA	NA	NA	NA
10B_11882458	10B	11882458	NA	NA	NA	NA
10B_11882686	10B	11882686	NA	NA	NA	NA
10B_11965013	10B	11965013	NA	NA	NA	NA
10B_11973903	10B	11973903	NA	NA	NA	NA
10B_12123810	10B	12123810	B_1174	12123810	12124078	4
10B_12123827	10B	12123827	B_1174	12123810	12124078	4
10B_12123857	10B	12123857	B_1174	12123810	12124078	4
10B_12124078	10B	12124078	B_1174	12123810	12124078	4
10B_12246237	10B	12246237	NA	NA	NA	NA
10B_12399037	10B	12399037	NA	NA	NA	NA
10B_12399301	10B	12399301	NA	NA	NA	NA
10B_12687772	10B	12687772	NA	NA	NA	NA
10B_12762240	10B	12762240	NA	NA	NA	NA
10B_12762249	10B	12762249	NA	NA	NA	NA
10B_12762280	10B	12762280	NA	NA	NA	NA
10B_12762291	10B	12762291	NA	NA	NA	NA
10B_12762294	10B	12762294	NA	NA	NA	NA
10B_12839401	10B	12839401	NA	NA	NA	NA
10B_13001231	10B	13001231	NA	NA	NA	NA
10B_13115415	10B	13115415	NA	NA	NA	NA
10B_13135724	10B	13135724	NA	NA	NA	NA
10B_13194512	10B	13194512	NA	NA	NA	NA
10B_13194520	10B	13194520	NA	NA	NA	NA
10B_13214457	10B	13214457	NA	NA	NA	NA
10B_13246500	10B	13246500	NA	NA	NA	NA
10B_13371689	10B	13371689	NA	NA	NA	NA
10B_13443381	10B	13443381	NA	NA	NA	NA
10B_13523246	10B	13523246	NA	NA	NA	NA
10B_13540650	10B	13540650	NA	NA	NA	NA
10B_13540710	10B	13540710	NA	NA	NA	NA
10B_13540979	10B	13540979	NA	NA	NA	NA
10B_13541023	10B	13541023	NA	NA	NA	NA
10B_13648189	10B	13648189	NA	NA	NA	NA
10B_13732866	10B	13732866	NA	NA	NA	NA
10B_13732909	10B	13732909	NA	NA	NA	NA
10B_13860867	10B	13860867	NA	NA	NA	NA
10B_13893186	10B	13893186	NA	NA	NA	NA
10B_13946265	10B	13946265	NA	NA	NA	NA
10B_13997527	10B	13997527	NA	NA	NA	NA
10B_13997560	10B	13997560	NA	NA	NA	NA
10B_14007731	10B	14007731	NA	NA	NA	NA
10B_14019914	10B	14019914	NA	NA	NA	NA
10B_14131245	10B	14131245	NA	NA	NA	NA
10B_14131253	10B	14131253	NA	NA	NA	NA
10B_14131265	10B	14131265	NA	NA	NA	NA
10B_14132247	10B	14132247	NA	NA	NA	NA
10B_14180237	10B	14180237	NA	NA	NA	NA
10B_14323849	10B	14323849	NA	NA	NA	NA
10B_14330493	10B	14330493	NA	NA	NA	NA
10B_14331364	10B	14331364	NA	NA	NA	NA
10B_14331425	10B	14331425	NA	NA	NA	NA
10B_14331433	10B	14331433	NA	NA	NA	NA
10B_14381508	10B	14381508	NA	NA	NA	NA
10B_14393960	10B	14393960	NA	NA	NA	NA
10B_14436383	10B	14436383	NA	NA	NA	NA
10B_14436806	10B	14436806	B_1175	14436806	14636682	6
10B_14498857	10B	14498857	B_1175	14436806	14636682	6
10B_14499163	10B	14499163	B_1175	14436806	14636682	6
10B_14499188	10B	14499188	B_1175	14436806	14636682	6
10B_14538361	10B	14538361	B_1175	14436806	14636682	6
10B_14616522	10B	14616522	B_1175	14436806	14636682	6
10B_14616528	10B	14616528	B_1175	14436806	14636682	6
10B_14616851	10B	14616851	B_1175	14436806	14636682	6
10B_14616899	10B	14616899	B_1175	14436806	14636682	6
10B_14636676	10B	14636676	B_1175	14436806	14636682	6
10B_14636682	10B	14636682	B_1175	14436806	14636682	6
10B_14637231	10B	14637231	NA	NA	NA	NA
10B_14676414	10B	14676414	B_1176	14676414	14676696	2
10B_14676696	10B	14676696	B_1176	14676414	14676696	2
10B_14751635	10B	14751635	NA	NA	NA	NA
10B_14772892	10B	14772892	NA	NA	NA	NA
10B_14780805	10B	14780805	NA	NA	NA	NA
10B_14807019	10B	14807019	NA	NA	NA	NA
10B_14807035	10B	14807035	NA	NA	NA	NA
10B_14807331	10B	14807331	NA	NA	NA	NA
10B_14815429	10B	14815429	NA	NA	NA	NA
10B_14816458	10B	14816458	NA	NA	NA	NA
10B_14816694	10B	14816694	B_1177	14816694	14816705	2
10B_14816705	10B	14816705	B_1177	14816694	14816705	2
10B_14828223	10B	14828223	NA	NA	NA	NA
10B_15220627	10B	15220627	NA	NA	NA	NA
10B_15433739	10B	15433739	B_1178	15433739	15447381	6
10B_15433978	10B	15433978	B_1178	15433739	15447381	6
10B_15433981	10B	15433981	B_1178	15433739	15447381	6
10B_15447049	10B	15447049	B_1178	15433739	15447381	6
10B_15447112	10B	15447112	B_1178	15433739	15447381	6
10B_15447381	10B	15447381	B_1178	15433739	15447381	6
10B_15447388	10B	15447388	NA	NA	NA	NA
10B_15456803	10B	15456803	NA	NA	NA	NA
10B_15459976	10B	15459976	NA	NA	NA	NA
10B_15529777	10B	15529777	NA	NA	NA	NA
10B_15618250	10B	15618250	NA	NA	NA	NA
10B_15628097	10B	15628097	NA	NA	NA	NA
10B_15732151	10B	15732151	NA	NA	NA	NA
10B_15774904	10B	15774904	NA	NA	NA	NA
10B_15832850	10B	15832850	NA	NA	NA	NA
10B_15871848	10B	15871848	NA	NA	NA	NA
10B_15885134	10B	15885134	B_1179	15885134	15902278	3
10B_15885429	10B	15885429	B_1179	15885134	15902278	3
10B_15902278	10B	15902278	B_1179	15885134	15902278	3
10B_16283393	10B	16283393	NA	NA	NA	NA
10B_16430944	10B	16430944	NA	NA	NA	NA
10B_16431233	10B	16431233	NA	NA	NA	NA
10B_16656288	10B	16656288	NA	NA	NA	NA
10B_16978858	10B	16978858	NA	NA	NA	NA
10B_17622750	10B	17622750	NA	NA	NA	NA
10B_17640376	10B	17640376	NA	NA	NA	NA
10B_17651375	10B	17651375	NA	NA	NA	NA
10B_17686625	10B	17686625	NA	NA	NA	NA
10B_17881282	10B	17881282	NA	NA	NA	NA
10B_18081585	10B	18081585	NA	NA	NA	NA
10B_18156147	10B	18156147	NA	NA	NA	NA
10B_18177030	10B	18177030	NA	NA	NA	NA
10B_18279298	10B	18279298	NA	NA	NA	NA
10B_18280875	10B	18280875	NA	NA	NA	NA
10B_18285105	10B	18285105	NA	NA	NA	NA
10B_18519053	10B	18519053	NA	NA	NA	NA
10B_18685400	10B	18685400	NA	NA	NA	NA
10B_18712279	10B	18712279	NA	NA	NA	NA
10B_18791488	10B	18791488	NA	NA	NA	NA
10B_18835165	10B	18835165	NA	NA	NA	NA
10B_18846397	10B	18846397	NA	NA	NA	NA
10B_18915948	10B	18915948	NA	NA	NA	NA
10B_18918442	10B	18918442	NA	NA	NA	NA
10B_18964483	10B	18964483	NA	NA	NA	NA
10B_19058388	10B	19058388	NA	NA	NA	NA
10B_19058705	10B	19058705	NA	NA	NA	NA
10B_19111773	10B	19111773	B_1180	19111773	19112082	2
10B_19112082	10B	19112082	B_1180	19111773	19112082	2
10B_19124755	10B	19124755	NA	NA	NA	NA
10B_19460765	10B	19460765	B_1181	19460765	19460832	3
10B_19460826	10B	19460826	B_1181	19460765	19460832	3
10B_19460832	10B	19460832	B_1181	19460765	19460832	3
10B_19510687	10B	19510687	NA	NA	NA	NA
10B_19566907	10B	19566907	NA	NA	NA	NA
10B_19570575	10B	19570575	B_1182	19570575	19570743	2
10B_19570743	10B	19570743	B_1182	19570575	19570743	2
10B_19652729	10B	19652729	NA	NA	NA	NA
10B_19652765	10B	19652765	NA	NA	NA	NA
10B_19692163	10B	19692163	NA	NA	NA	NA
10B_19778121	10B	19778121	B_1183	19778121	19778413	4
10B_19778149	10B	19778149	B_1183	19778121	19778413	4
10B_19778213	10B	19778213	B_1183	19778121	19778413	4
10B_19778377	10B	19778377	B_1183	19778121	19778413	4
10B_19778413	10B	19778413	B_1183	19778121	19778413	4
10B_19986026	10B	19986026	NA	NA	NA	NA
1A_206453	1A	206453	NA	NA	NA	NA
1A_225085	1A	225085	NA	NA	NA	NA
1A_312539	1A	312539	NA	NA	NA	NA
1A_345165	1A	345165	NA	NA	NA	NA
1A_363544	1A	363544	B_1	363544	363855	2
1A_363855	1A	363855	B_1	363544	363855	2
1A_410531	1A	410531	B_2	410531	423316	4
1A_410547	1A	410547	B_2	410531	423316	4
1A_422619	1A	422619	B_2	410531	423316	4
1A_422621	1A	422621	B_2	410531	423316	4
1A_423316	1A	423316	B_2	410531	423316	4
1A_487593	1A	487593	NA	NA	NA	NA
1A_491309	1A	491309	NA	NA	NA	NA
1A_540221	1A	540221	NA	NA	NA	NA
1A_651644	1A	651644	NA	NA	NA	NA
1A_758060	1A	758060	NA	NA	NA	NA
1A_878978	1A	878978	NA	NA	NA	NA
1A_1005831	1A	1005831	NA	NA	NA	NA
1A_1018242	1A	1018242	NA	NA	NA	NA
1A_1237645	1A	1237645	NA	NA	NA	NA
1A_1313393	1A	1313393	B_3	1313393	1366110	6
1A_1313707	1A	1313707	B_3	1313393	1366110	6
1A_1313727	1A	1313727	B_3	1313393	1366110	6
1A_1313734	1A	1313734	B_3	1313393	1366110	6
1A_1334522	1A	1334522	B_3	1313393	1366110	6
1A_1366110	1A	1366110	B_3	1313393	1366110	6
1A_1472602	1A	1472602	NA	NA	NA	NA
1A_1571587	1A	1571587	NA	NA	NA	NA
1A_1639354	1A	1639354	NA	NA	NA	NA
1A_1736302	1A	1736302	NA	NA	NA	NA
1A_1842507	1A	1842507	NA	NA	NA	NA
1A_1842747	1A	1842747	NA	NA	NA	NA
1A_1871697	1A	1871697	NA	NA	NA	NA
1A_2146617	1A	2146617	B_4	2146617	2275400	5
1A_2159655	1A	2159655	B_4	2146617	2275400	5
1A_2175604	1A	2175604	B_4	2146617	2275400	5
1A_2175631	1A	2175631	B_4	2146617	2275400	5
1A_2275400	1A	2275400	B_4	2146617	2275400	5
1A_2488028	1A	2488028	NA	NA	NA	NA
1A_2899806	1A	2899806	NA	NA	NA	NA
1A_2997179	1A	2997179	NA	NA	NA	NA
1A_3016394	1A	3016394	NA	NA	NA	NA
1A_3016427	1A	3016427	NA	NA	NA	NA
1A_3016433	1A	3016433	NA	NA	NA	NA
1A_3083409	1A	3083409	NA	NA	NA	NA
1A_3111307	1A	3111307	NA	NA	NA	NA
1A_3160694	1A	3160694	NA	NA	NA	NA
1A_3215237	1A	3215237	NA	NA	NA	NA
1A_3215265	1A	3215265	NA	NA	NA	NA
1A_3353606	1A	3353606	NA	NA	NA	NA
1A_3353880	1A	3353880	NA	NA	NA	NA
1A_3353901	1A	3353901	NA	NA	NA	NA
1A_3353939	1A	3353939	NA	NA	NA	NA
1A_3399854	1A	3399854	NA	NA	NA	NA
1A_3399861	1A	3399861	NA	NA	NA	NA
1A_3399862	1A	3399862	NA	NA	NA	NA
1A_3423382	1A	3423382	NA	NA	NA	NA
1A_3448380	1A	3448380	NA	NA	NA	NA
1A_3465857	1A	3465857	NA	NA	NA	NA
1A_3511480	1A	3511480	NA	NA	NA	NA
1A_3558780	1A	3558780	B_5	3558780	3570581	7
1A_3558794	1A	3558794	B_5	3558780	3570581	7
1A_3558807	1A	3558807	B_5	3558780	3570581	7
1A_3558823	1A	3558823	B_5	3558780	3570581	7
1A_3558864	1A	3558864	B_5	3558780	3570581	7
1A_3570580	1A	3570580	B_5	3558780	3570581	7
1A_3570581	1A	3570581	B_5	3558780	3570581	7
1A_3603677	1A	3603677	NA	NA	NA	NA
1A_3725246	1A	3725246	B_6	3725246	3725309	2
1A_3725309	1A	3725309	B_6	3725246	3725309	2
1A_3798904	1A	3798904	NA	NA	NA	NA
1A_3803579	1A	3803579	B_7	3803579	3803611	2
1A_3803611	1A	3803611	B_7	3803579	3803611	2
1A_3922951	1A	3922951	NA	NA	NA	NA
1A_3922968	1A	3922968	B_8	3922968	3923243	2
1A_3923243	1A	3923243	B_8	3922968	3923243	2
1A_4003990	1A	4003990	B_9	4003990	4004318	3
1A_4004018	1A	4004018	B_9	4003990	4004318	3
1A_4004318	1A	4004318	B_9	4003990	4004318	3
1A_4051387	1A	4051387	NA	NA	NA	NA
1A_4105887	1A	4105887	NA	NA	NA	NA
1A_4134424	1A	4134424	B_10	4134424	4134671	2
1A_4134671	1A	4134671	B_10	4134424	4134671	2
1A_4355005	1A	4355005	NA	NA	NA	NA
1A_4416297	1A	4416297	NA	NA	NA	NA
1A_4416317	1A	4416317	NA	NA	NA	NA
1A_4428017	1A	4428017	NA	NA	NA	NA
1A_4548101	1A	4548101	NA	NA	NA	NA
1A_4604929	1A	4604929	NA	NA	NA	NA
1A_4636171	1A	4636171	NA	NA	NA	NA
1A_4681482	1A	4681482	NA	NA	NA	NA
1A_4681799	1A	4681799	NA	NA	NA	NA
1A_4709350	1A	4709350	NA	NA	NA	NA
1A_4777007	1A	4777007	NA	NA	NA	NA
1A_4908197	1A	4908197	NA	NA	NA	NA
1A_5029350	1A	5029350	NA	NA	NA	NA
1A_5257448	1A	5257448	NA	NA	NA	NA
1A_5257494	1A	5257494	NA	NA	NA	NA
1A_5430659	1A	5430659	NA	NA	NA	NA
1A_5431042	1A	5431042	NA	NA	NA	NA
1A_5435570	1A	5435570	NA	NA	NA	NA
1A_5550826	1A	5550826	NA	NA	NA	NA
1A_5578989	1A	5578989	NA	NA	NA	NA
1A_5609393	1A	5609393	NA	NA	NA	NA
1A_5609429	1A	5609429	NA	NA	NA	NA
1A_5719547	1A	5719547	NA	NA	NA	NA
1A_5894207	1A	5894207	NA	NA	NA	NA
1A_5963596	1A	5963596	NA	NA	NA	NA
1A_6343839	1A	6343839	B_11	6343839	6357496	3
1A_6357134	1A	6357134	B_11	6343839	6357496	3
1A_6357413	1A	6357413	B_11	6343839	6357496	3
1A_6357496	1A	6357496	B_11	6343839	6357496	3
1A_6674932	1A	6674932	B_12	6674932	6675261	3
1A_6674978	1A	6674978	B_12	6674932	6675261	3
1A_6675261	1A	6675261	B_12	6674932	6675261	3
1A_6783830	1A	6783830	NA	NA	NA	NA
1A_6933328	1A	6933328	NA	NA	NA	NA
1A_6933342	1A	6933342	NA	NA	NA	NA
1A_6964065	1A	6964065	NA	NA	NA	NA
1A_7034944	1A	7034944	NA	NA	NA	NA
1A_7064740	1A	7064740	NA	NA	NA	NA
1A_7181856	1A	7181856	B_13	7181856	7254566	5
1A_7182127	1A	7182127	B_13	7181856	7254566	5
1A_7189994	1A	7189994	B_13	7181856	7254566	5
1A_7217388	1A	7217388	B_13	7181856	7254566	5
1A_7217683	1A	7217683	B_13	7181856	7254566	5
1A_7229348	1A	7229348	B_13	7181856	7254566	5
1A_7254566	1A	7254566	B_13	7181856	7254566	5
1A_7464167	1A	7464167	NA	NA	NA	NA
1A_7464548	1A	7464548	NA	NA	NA	NA
1A_7501810	1A	7501810	B_14	7501810	7501812	2
1A_7501812	1A	7501812	B_14	7501810	7501812	2
1A_7502865	1A	7502865	NA	NA	NA	NA
1A_7503870	1A	7503870	NA	NA	NA	NA
1A_7503911	1A	7503911	NA	NA	NA	NA
1A_7505424	1A	7505424	NA	NA	NA	NA
1A_7679151	1A	7679151	NA	NA	NA	NA
1A_7848939	1A	7848939	NA	NA	NA	NA
1A_7849237	1A	7849237	B_15	7849237	7849271	2
1A_7849271	1A	7849271	B_15	7849237	7849271	2
1A_7849275	1A	7849275	B_16	7849275	7849822	4
1A_7849281	1A	7849281	B_16	7849275	7849822	4
1A_7849288	1A	7849288	B_16	7849275	7849822	4
1A_7849822	1A	7849822	B_16	7849275	7849822	4
1A_7922766	1A	7922766	B_17	7922766	7935342	2
1A_7935342	1A	7935342	B_17	7922766	7935342	2
1A_7985553	1A	7985553	NA	NA	NA	NA
1A_7986463	1A	7986463	B_18	7986463	8024135	4
1A_7992325	1A	7992325	B_18	7986463	8024135	4
1A_7992601	1A	7992601	B_18	7986463	8024135	4
1A_8000520	1A	8000520	B_18	7986463	8024135	4
1A_8024135	1A	8024135	B_18	7986463	8024135	4
1A_8024145	1A	8024145	NA	NA	NA	NA
1A_8024168	1A	8024168	NA	NA	NA	NA
1A_8110235	1A	8110235	B_19	8110235	8110299	2
1A_8110299	1A	8110299	B_19	8110235	8110299	2
1A_8184937	1A	8184937	NA	NA	NA	NA
1A_8235803	1A	8235803	NA	NA	NA	NA
1A_8245073	1A	8245073	NA	NA	NA	NA
1A_8278191	1A	8278191	NA	NA	NA	NA
1A_8295692	1A	8295692	NA	NA	NA	NA
1A_8338612	1A	8338612	NA	NA	NA	NA
1A_8338873	1A	8338873	NA	NA	NA	NA
1A_8551322	1A	8551322	NA	NA	NA	NA
1A_8614515	1A	8614515	NA	NA	NA	NA
1A_8619792	1A	8619792	B_20	8619792	8633846	3
1A_8627564	1A	8627564	B_20	8619792	8633846	3
1A_8633846	1A	8633846	B_20	8619792	8633846	3
1A_8676686	1A	8676686	B_21	8676686	8694136	2
1A_8694136	1A	8694136	B_21	8676686	8694136	2
1A_8716146	1A	8716146	NA	NA	NA	NA
1A_8735022	1A	8735022	NA	NA	NA	NA
1A_8757375	1A	8757375	NA	NA	NA	NA
1A_8757406	1A	8757406	NA	NA	NA	NA
1A_8789260	1A	8789260	NA	NA	NA	NA
1A_8898413	1A	8898413	B_22	8898413	8905493	4
1A_8905184	1A	8905184	B_22	8898413	8905493	4
1A_8905252	1A	8905252	B_22	8898413	8905493	4
1A_8905493	1A	8905493	B_22	8898413	8905493	4
1A_8908387	1A	8908387	NA	NA	NA	NA
1A_8910528	1A	8910528	NA	NA	NA	NA
1A_8973741	1A	8973741	NA	NA	NA	NA
1A_8994843	1A	8994843	NA	NA	NA	NA
1A_9053953	1A	9053953	B_23	9053953	9054277	7
1A_9053964	1A	9053964	B_23	9053953	9054277	7
1A_9053978	1A	9053978	B_23	9053953	9054277	7
1A_9054213	1A	9054213	B_23	9053953	9054277	7
1A_9054223	1A	9054223	B_23	9053953	9054277	7
1A_9054251	1A	9054251	B_23	9053953	9054277	7
1A_9054277	1A	9054277	B_23	9053953	9054277	7
1A_9131888	1A	9131888	NA	NA	NA	NA
1A_9132150	1A	9132150	NA	NA	NA	NA
1A_9142039	1A	9142039	NA	NA	NA	NA
1A_9142373	1A	9142373	NA	NA	NA	NA
1A_9164499	1A	9164499	NA	NA	NA	NA
1A_9175436	1A	9175436	NA	NA	NA	NA
1A_9197750	1A	9197750	NA	NA	NA	NA
1A_9642540	1A	9642540	NA	NA	NA	NA
1A_9939212	1A	9939212	NA	NA	NA	NA
1A_10009406	1A	10009406	NA	NA	NA	NA
1A_10009427	1A	10009427	NA	NA	NA	NA
1A_10009475	1A	10009475	NA	NA	NA	NA
1A_10089396	1A	10089396	NA	NA	NA	NA
1A_10171346	1A	10171346	NA	NA	NA	NA
1A_10179062	1A	10179062	NA	NA	NA	NA
1A_10179348	1A	10179348	NA	NA	NA	NA
1A_10343344	1A	10343344	NA	NA	NA	NA
1A_10345173	1A	10345173	NA	NA	NA	NA
1A_10580011	1A	10580011	NA	NA	NA	NA
1A_10580429	1A	10580429	NA	NA	NA	NA
1A_10756439	1A	10756439	NA	NA	NA	NA
1A_10870865	1A	10870865	NA	NA	NA	NA
1A_10870904	1A	10870904	NA	NA	NA	NA
1A_10870918	1A	10870918	NA	NA	NA	NA
1A_10871188	1A	10871188	NA	NA	NA	NA
1A_10874875	1A	10874875	NA	NA	NA	NA
1A_11029367	1A	11029367	NA	NA	NA	NA
1A_11178504	1A	11178504	NA	NA	NA	NA
1A_11485272	1A	11485272	NA	NA	NA	NA
1A_11550037	1A	11550037	NA	NA	NA	NA
1A_11712343	1A	11712343	NA	NA	NA	NA
1A_11713649	1A	11713649	NA	NA	NA	NA
1A_11799183	1A	11799183	NA	NA	NA	NA
1A_11822650	1A	11822650	B_24	11822650	11943816	6
1A_11879746	1A	11879746	B_24	11822650	11943816	6
1A_11917373	1A	11917373	B_24	11822650	11943816	6
1A_11917394	1A	11917394	B_24	11822650	11943816	6
1A_11917395	1A	11917395	B_24	11822650	11943816	6
1A_11943816	1A	11943816	B_24	11822650	11943816	6
1A_11979139	1A	11979139	NA	NA	NA	NA
1A_12352457	1A	12352457	NA	NA	NA	NA
1A_12422690	1A	12422690	B_25	12422690	12422951	2
1A_12422951	1A	12422951	B_25	12422690	12422951	2
1A_12670631	1A	12670631	NA	NA	NA	NA
1A_12791153	1A	12791153	NA	NA	NA	NA
1A_13052933	1A	13052933	NA	NA	NA	NA
1A_13112195	1A	13112195	B_26	13112195	13112197	2
1A_13112197	1A	13112197	B_26	13112195	13112197	2
1A_13130480	1A	13130480	NA	NA	NA	NA
1A_13136965	1A	13136965	NA	NA	NA	NA
1A_13165506	1A	13165506	NA	NA	NA	NA
1A_13182280	1A	13182280	NA	NA	NA	NA
1A_13182306	1A	13182306	NA	NA	NA	NA
1A_13182556	1A	13182556	NA	NA	NA	NA
1A_13182575	1A	13182575	NA	NA	NA	NA
1A_13212988	1A	13212988	NA	NA	NA	NA
1A_13252690	1A	13252690	NA	NA	NA	NA
1A_13252696	1A	13252696	NA	NA	NA	NA
1A_13252706	1A	13252706	NA	NA	NA	NA
1A_13252739	1A	13252739	NA	NA	NA	NA
1A_13252918	1A	13252918	NA	NA	NA	NA
1A_13252927	1A	13252927	NA	NA	NA	NA
1A_13252942	1A	13252942	NA	NA	NA	NA
1A_13252972	1A	13252972	NA	NA	NA	NA
1A_13252979	1A	13252979	NA	NA	NA	NA
1A_13253374	1A	13253374	NA	NA	NA	NA
1A_13257694	1A	13257694	NA	NA	NA	NA
1A_13298734	1A	13298734	NA	NA	NA	NA
1A_13298990	1A	13298990	NA	NA	NA	NA
1A_13345053	1A	13345053	NA	NA	NA	NA
1A_13345065	1A	13345065	NA	NA	NA	NA
1A_13345289	1A	13345289	NA	NA	NA	NA
1A_13407096	1A	13407096	B_27	13407096	13407825	3
1A_13407114	1A	13407114	B_27	13407096	13407825	3
1A_13407158	1A	13407158	B_27	13407096	13407825	3
1A_13407825	1A	13407825	B_27	13407096	13407825	3
1A_13457208	1A	13457208	B_28	13457208	13476793	2
1A_13476793	1A	13476793	B_28	13457208	13476793	2
1A_13476801	1A	13476801	NA	NA	NA	NA
1A_13496950	1A	13496950	NA	NA	NA	NA
1A_13731152	1A	13731152	NA	NA	NA	NA
1A_13802751	1A	13802751	B_29	13802751	13802833	3
1A_13802796	1A	13802796	B_29	13802751	13802833	3
1A_13802833	1A	13802833	B_29	13802751	13802833	3
1A_13803056	1A	13803056	B_30	13803056	13820968	3
1A_13807901	1A	13807901	B_30	13803056	13820968	3
1A_13820968	1A	13820968	B_30	13803056	13820968	3
1A_13834243	1A	13834243	NA	NA	NA	NA
1A_13905019	1A	13905019	NA	NA	NA	NA
1A_13905324	1A	13905324	NA	NA	NA	NA
1A_13905381	1A	13905381	NA	NA	NA	NA
1A_14100650	1A	14100650	B_31	14100650	14108350	4
1A_14100686	1A	14100686	B_31	14100650	14108350	4
1A_14100696	1A	14100696	B_31	14100650	14108350	4
1A_14108350	1A	14108350	B_31	14100650	14108350	4
1A_14313917	1A	14313917	NA	NA	NA	NA
1A_14555580	1A	14555580	NA	NA	NA	NA
1A_14669116	1A	14669116	NA	NA	NA	NA
1A_14669130	1A	14669130	NA	NA	NA	NA
1A_14767719	1A	14767719	NA	NA	NA	NA
1A_14987733	1A	14987733	NA	NA	NA	NA
1A_14987941	1A	14987941	NA	NA	NA	NA
1A_15244490	1A	15244490	NA	NA	NA	NA
1A_15259968	1A	15259968	NA	NA	NA	NA
1A_15571011	1A	15571011	NA	NA	NA	NA
1A_15958385	1A	15958385	NA	NA	NA	NA
1A_15958668	1A	15958668	NA	NA	NA	NA
1A_16102662	1A	16102662	NA	NA	NA	NA
1A_16102700	1A	16102700	NA	NA	NA	NA
1A_16102964	1A	16102964	NA	NA	NA	NA
1A_16128407	1A	16128407	NA	NA	NA	NA
1A_16128721	1A	16128721	NA	NA	NA	NA
1A_16133140	1A	16133140	NA	NA	NA	NA
1A_16133160	1A	16133160	NA	NA	NA	NA
1A_16133162	1A	16133162	NA	NA	NA	NA
1A_16133187	1A	16133187	NA	NA	NA	NA
1A_16220532	1A	16220532	NA	NA	NA	NA
1A_16392670	1A	16392670	NA	NA	NA	NA
1A_17635731	1A	17635731	NA	NA	NA	NA
1A_17770210	1A	17770210	NA	NA	NA	NA
1A_17945353	1A	17945353	NA	NA	NA	NA
1A_17952650	1A	17952650	B_32	17952650	17952996	2
1A_17952996	1A	17952996	B_32	17952650	17952996	2
1A_17955228	1A	17955228	NA	NA	NA	NA
1A_17979910	1A	17979910	NA	NA	NA	NA
1A_18034658	1A	18034658	B_33	18034658	18034662	2
1A_18034662	1A	18034662	B_33	18034658	18034662	2
1A_18218232	1A	18218232	NA	NA	NA	NA
1A_18223870	1A	18223870	NA	NA	NA	NA
1A_18574813	1A	18574813	B_34	18574813	18574820	2
1A_18574820	1A	18574820	B_34	18574813	18574820	2
1A_18677529	1A	18677529	NA	NA	NA	NA
1A_18753106	1A	18753106	B_35	18753106	18753313	2
1A_18753313	1A	18753313	B_35	18753106	18753313	2
1A_19277238	1A	19277238	NA	NA	NA	NA
1A_19569402	1A	19569402	B_36	19569402	19640676	5
1A_19569418	1A	19569418	B_36	19569402	19640676	5
1A_19569442	1A	19569442	B_36	19569402	19640676	5
1A_19569446	1A	19569446	B_36	19569402	19640676	5
1A_19621935	1A	19621935	B_36	19569402	19640676	5
1A_19627537	1A	19627537	B_36	19569402	19640676	5
1A_19640676	1A	19640676	B_36	19569402	19640676	5
1A_19679188	1A	19679188	NA	NA	NA	NA
1A_19724818	1A	19724818	NA	NA	NA	NA
1A_19841747	1A	19841747	NA	NA	NA	NA
1A_19904776	1A	19904776	B_37	19904776	19904803	2
1A_19904803	1A	19904803	B_37	19904776	19904803	2
1A_19917637	1A	19917637	B_38	19917637	20008726	4
1A_20008420	1A	20008420	B_38	19917637	20008726	4
1A_20008464	1A	20008464	B_38	19917637	20008726	4
1A_20008726	1A	20008726	B_38	19917637	20008726	4
1A_20008765	1A	20008765	NA	NA	NA	NA
1A_20031111	1A	20031111	B_39	20031111	20230521	5
1A_20042711	1A	20042711	B_39	20031111	20230521	5
1A_20081795	1A	20081795	B_39	20031111	20230521	5
1A_20081801	1A	20081801	B_39	20031111	20230521	5
1A_20230248	1A	20230248	B_39	20031111	20230521	5
1A_20230521	1A	20230521	B_39	20031111	20230521	5
1A_20363229	1A	20363229	NA	NA	NA	NA
1A_20432942	1A	20432942	NA	NA	NA	NA
1A_20432974	1A	20432974	NA	NA	NA	NA
1A_20447886	1A	20447886	NA	NA	NA	NA
1A_20447895	1A	20447895	NA	NA	NA	NA
1A_20456628	1A	20456628	B_40	20456628	20646867	24
1A_20456827	1A	20456827	B_40	20456628	20646867	24
1A_20456828	1A	20456828	B_40	20456628	20646867	24
1A_20456832	1A	20456832	B_40	20456628	20646867	24
1A_20457186	1A	20457186	B_40	20456628	20646867	24
1A_20475041	1A	20475041	B_40	20456628	20646867	24
1A_20475108	1A	20475108	B_40	20456628	20646867	24
1A_20475113	1A	20475113	B_40	20456628	20646867	24
1A_20475336	1A	20475336	B_40	20456628	20646867	24
1A_20488961	1A	20488961	B_40	20456628	20646867	24
1A_20554838	1A	20554838	B_40	20456628	20646867	24
1A_20554852	1A	20554852	B_40	20456628	20646867	24
1A_20609897	1A	20609897	B_40	20456628	20646867	24
1A_20610154	1A	20610154	B_40	20456628	20646867	24
1A_20610161	1A	20610161	B_40	20456628	20646867	24
1A_20610219	1A	20610219	B_40	20456628	20646867	24
1A_20610231	1A	20610231	B_40	20456628	20646867	24
1A_20610583	1A	20610583	B_40	20456628	20646867	24
1A_20610620	1A	20610620	B_40	20456628	20646867	24
1A_20610908	1A	20610908	B_40	20456628	20646867	24
1A_20611102	1A	20611102	B_40	20456628	20646867	24
1A_20620728	1A	20620728	B_40	20456628	20646867	24
1A_20646446	1A	20646446	B_40	20456628	20646867	24
1A_20646484	1A	20646484	B_40	20456628	20646867	24
1A_20646798	1A	20646798	B_40	20456628	20646867	24
1A_20646821	1A	20646821	B_40	20456628	20646867	24
1A_20646867	1A	20646867	B_40	20456628	20646867	24
1A_20678463	1A	20678463	B_41	20678463	20707703	7
1A_20678758	1A	20678758	B_41	20678463	20707703	7
1A_20706989	1A	20706989	B_41	20678463	20707703	7
1A_20707034	1A	20707034	B_41	20678463	20707703	7
1A_20707324	1A	20707324	B_41	20678463	20707703	7
1A_20707678	1A	20707678	B_41	20678463	20707703	7
1A_20707703	1A	20707703	B_41	20678463	20707703	7
1A_20727608	1A	20727608	B_42	20727608	20753899	5
1A_20727862	1A	20727862	B_42	20727608	20753899	5
1A_20727865	1A	20727865	B_42	20727608	20753899	5
1A_20753458	1A	20753458	B_42	20727608	20753899	5
1A_20753790	1A	20753790	B_42	20727608	20753899	5
1A_20753899	1A	20753899	B_42	20727608	20753899	5
1A_20757732	1A	20757732	NA	NA	NA	NA
1A_20757736	1A	20757736	B_43	20757736	20757746	2
1A_20757746	1A	20757746	B_43	20757736	20757746	2
1A_20807412	1A	20807412	NA	NA	NA	NA
1A_20839150	1A	20839150	NA	NA	NA	NA
1A_20844357	1A	20844357	B_44	20844357	20981225	4
1A_20844863	1A	20844863	B_44	20844357	20981225	4
1A_20845088	1A	20845088	B_44	20844357	20981225	4
1A_20969573	1A	20969573	B_44	20844357	20981225	4
1A_20969890	1A	20969890	B_44	20844357	20981225	4
1A_20981225	1A	20981225	B_44	20844357	20981225	4
1A_20981281	1A	20981281	B_45	20981281	21035203	6
1A_20981367	1A	20981367	B_45	20981281	21035203	6
1A_20981370	1A	20981370	B_45	20981281	21035203	6
1A_20993155	1A	20993155	B_45	20981281	21035203	6
1A_21034529	1A	21034529	B_45	20981281	21035203	6
1A_21034571	1A	21034571	B_45	20981281	21035203	6
1A_21034582	1A	21034582	B_45	20981281	21035203	6
1A_21034911	1A	21034911	B_45	20981281	21035203	6
1A_21035203	1A	21035203	B_45	20981281	21035203	6
1A_21035237	1A	21035237	NA	NA	NA	NA
1A_21053485	1A	21053485	B_46	21053485	21240641	15
1A_21053532	1A	21053532	B_46	21053485	21240641	15
1A_21053544	1A	21053544	B_46	21053485	21240641	15
1A_21053929	1A	21053929	B_46	21053485	21240641	15
1A_21054173	1A	21054173	B_46	21053485	21240641	15
1A_21054211	1A	21054211	B_46	21053485	21240641	15
1A_21107745	1A	21107745	B_46	21053485	21240641	15
1A_21108095	1A	21108095	B_46	21053485	21240641	15
1A_21141343	1A	21141343	B_46	21053485	21240641	15
1A_21141360	1A	21141360	B_46	21053485	21240641	15
1A_21141703	1A	21141703	B_46	21053485	21240641	15
1A_21146867	1A	21146867	B_46	21053485	21240641	15
1A_21146900	1A	21146900	B_46	21053485	21240641	15
1A_21147207	1A	21147207	B_46	21053485	21240641	15
1A_21240353	1A	21240353	B_46	21053485	21240641	15
1A_21240641	1A	21240641	B_46	21053485	21240641	15
1A_21272867	1A	21272867	B_47	21272867	21401892	5
1A_21272878	1A	21272878	B_47	21272867	21401892	5
1A_21401588	1A	21401588	B_47	21272867	21401892	5
1A_21401837	1A	21401837	B_47	21272867	21401892	5
1A_21401892	1A	21401892	B_47	21272867	21401892	5
1A_21484612	1A	21484612	NA	NA	NA	NA
1A_21514681	1A	21514681	NA	NA	NA	NA
1A_21514696	1A	21514696	NA	NA	NA	NA
1A_21636197	1A	21636197	NA	NA	NA	NA
1A_21643507	1A	21643507	NA	NA	NA	NA
1A_21643508	1A	21643508	B_48	21643508	21806254	7
1A_21643514	1A	21643514	B_48	21643508	21806254	7
1A_21643515	1A	21643515	B_48	21643508	21806254	7
1A_21673392	1A	21673392	B_48	21643508	21806254	7
1A_21747728	1A	21747728	B_48	21643508	21806254	7
1A_21748015	1A	21748015	B_48	21643508	21806254	7
1A_21748061	1A	21748061	B_48	21643508	21806254	7
1A_21748079	1A	21748079	B_48	21643508	21806254	7
1A_21780975	1A	21780975	B_48	21643508	21806254	7
1A_21806254	1A	21806254	B_48	21643508	21806254	7
1A_22154291	1A	22154291	NA	NA	NA	NA
1A_22154329	1A	22154329	NA	NA	NA	NA
1A_22154332	1A	22154332	NA	NA	NA	NA
1A_22154582	1A	22154582	NA	NA	NA	NA
1A_22154628	1A	22154628	NA	NA	NA	NA
1A_22169627	1A	22169627	B_49	22169627	22355125	7
1A_22169869	1A	22169869	B_49	22169627	22355125	7
1A_22169875	1A	22169875	B_49	22169627	22355125	7
1A_22169901	1A	22169901	B_49	22169627	22355125	7
1A_22176904	1A	22176904	B_49	22169627	22355125	7
1A_22176916	1A	22176916	B_49	22169627	22355125	7
1A_22202347	1A	22202347	B_49	22169627	22355125	7
1A_22202688	1A	22202688	B_49	22169627	22355125	7
1A_22202744	1A	22202744	B_49	22169627	22355125	7
1A_22258079	1A	22258079	B_49	22169627	22355125	7
1A_22267805	1A	22267805	B_49	22169627	22355125	7
1A_22272489	1A	22272489	B_49	22169627	22355125	7
1A_22349993	1A	22349993	B_49	22169627	22355125	7
1A_22350287	1A	22350287	B_49	22169627	22355125	7
1A_22354810	1A	22354810	B_49	22169627	22355125	7
1A_22355119	1A	22355119	B_49	22169627	22355125	7
1A_22355125	1A	22355125	B_49	22169627	22355125	7
1A_22408138	1A	22408138	B_50	22408138	22408412	2
1A_22408226	1A	22408226	B_50	22408138	22408412	2
1A_22408412	1A	22408412	B_50	22408138	22408412	2
1A_22692075	1A	22692075	B_51	22692075	22856236	6
1A_22704469	1A	22704469	B_51	22692075	22856236	6
1A_22704482	1A	22704482	B_51	22692075	22856236	6
1A_22736504	1A	22736504	B_51	22692075	22856236	6
1A_22827509	1A	22827509	B_51	22692075	22856236	6
1A_22854493	1A	22854493	B_51	22692075	22856236	6
1A_22856236	1A	22856236	B_51	22692075	22856236	6
1A_23009328	1A	23009328	NA	NA	NA	NA
1A_23064748	1A	23064748	NA	NA	NA	NA
1A_23064934	1A	23064934	NA	NA	NA	NA
1A_23065185	1A	23065185	NA	NA	NA	NA
1A_23065191	1A	23065191	NA	NA	NA	NA
1A_23065222	1A	23065222	NA	NA	NA	NA
1A_23077070	1A	23077070	NA	NA	NA	NA
1A_23113602	1A	23113602	NA	NA	NA	NA
1A_23297659	1A	23297659	B_52	23297659	23297665	2
1A_23297665	1A	23297665	B_52	23297659	23297665	2
1A_23307769	1A	23307769	NA	NA	NA	NA
1A_23321879	1A	23321879	NA	NA	NA	NA
1A_23324416	1A	23324416	NA	NA	NA	NA
1A_23359789	1A	23359789	NA	NA	NA	NA
1A_23442440	1A	23442440	B_53	23442440	23453718	2
1A_23453718	1A	23453718	B_53	23442440	23453718	2
1A_23453734	1A	23453734	B_54	23453734	23453984	2
1A_23453984	1A	23453984	B_54	23453734	23453984	2
1A_23498608	1A	23498608	NA	NA	NA	NA
1A_23498613	1A	23498613	NA	NA	NA	NA
1A_23498614	1A	23498614	NA	NA	NA	NA
1A_23547166	1A	23547166	NA	NA	NA	NA
1A_23547185	1A	23547185	NA	NA	NA	NA
1A_23547213	1A	23547213	NA	NA	NA	NA
1A_23567979	1A	23567979	NA	NA	NA	NA
1A_23609557	1A	23609557	NA	NA	NA	NA
1A_23613054	1A	23613054	B_55	23613054	23613339	2
1A_23613339	1A	23613339	B_55	23613054	23613339	2
1A_23662577	1A	23662577	NA	NA	NA	NA
1A_23666240	1A	23666240	NA	NA	NA	NA
1A_23730648	1A	23730648	NA	NA	NA	NA
1A_23730959	1A	23730959	NA	NA	NA	NA
1A_23731009	1A	23731009	NA	NA	NA	NA
1A_23758522	1A	23758522	NA	NA	NA	NA
1A_23758837	1A	23758837	NA	NA	NA	NA
1A_23767392	1A	23767392	NA	NA	NA	NA
1A_23767729	1A	23767729	B_56	23767729	23820300	7
1A_23795511	1A	23795511	B_56	23767729	23820300	7
1A_23819911	1A	23819911	B_56	23767729	23820300	7
1A_23819936	1A	23819936	B_56	23767729	23820300	7
1A_23820130	1A	23820130	B_56	23767729	23820300	7
1A_23820170	1A	23820170	B_56	23767729	23820300	7
1A_23820245	1A	23820245	B_56	23767729	23820300	7
1A_23820300	1A	23820300	B_56	23767729	23820300	7
1A_23963081	1A	23963081	NA	NA	NA	NA
1A_24110475	1A	24110475	B_57	24110475	24197090	7
1A_24125298	1A	24125298	B_57	24110475	24197090	7
1A_24125308	1A	24125308	B_57	24110475	24197090	7
1A_24125334	1A	24125334	B_57	24110475	24197090	7
1A_24134477	1A	24134477	B_57	24110475	24197090	7
1A_24134497	1A	24134497	B_57	24110475	24197090	7
1A_24197090	1A	24197090	B_57	24110475	24197090	7
1A_24197386	1A	24197386	NA	NA	NA	NA
1A_24226846	1A	24226846	NA	NA	NA	NA
1A_24239455	1A	24239455	B_58	24239455	24247880	5
1A_24239510	1A	24239510	B_58	24239455	24247880	5
1A_24239528	1A	24239528	B_58	24239455	24247880	5
1A_24239750	1A	24239750	B_58	24239455	24247880	5
1A_24247880	1A	24247880	B_58	24239455	24247880	5
1A_24247915	1A	24247915	NA	NA	NA	NA
1A_24248088	1A	24248088	NA	NA	NA	NA
1A_24248128	1A	24248128	NA	NA	NA	NA
1A_24328597	1A	24328597	B_59	24328597	24328645	2
1A_24328645	1A	24328645	B_59	24328597	24328645	2
1A_24345755	1A	24345755	NA	NA	NA	NA
1A_24433002	1A	24433002	NA	NA	NA	NA
1A_24440379	1A	24440379	NA	NA	NA	NA
1A_24440390	1A	24440390	B_60	24440390	24454409	2
1A_24440643	1A	24440643	B_60	24440390	24454409	2
1A_24454409	1A	24454409	B_60	24440390	24454409	2
1A_24454654	1A	24454654	B_61	24454654	24551851	8
1A_24476364	1A	24476364	B_61	24454654	24551851	8
1A_24476395	1A	24476395	B_61	24454654	24551851	8
1A_24506143	1A	24506143	B_61	24454654	24551851	8
1A_24509201	1A	24509201	B_61	24454654	24551851	8
1A_24551788	1A	24551788	B_61	24454654	24551851	8
1A_24551850	1A	24551850	B_61	24454654	24551851	8
1A_24551851	1A	24551851	B_61	24454654	24551851	8
1A_24690274	1A	24690274	NA	NA	NA	NA
1A_24729538	1A	24729538	B_62	24729538	24729587	2
1A_24729587	1A	24729587	B_62	24729538	24729587	2
1A_24765052	1A	24765052	NA	NA	NA	NA
1A_24806283	1A	24806283	B_63	24806283	24942996	7
1A_24826707	1A	24826707	B_63	24806283	24942996	7
1A_24837062	1A	24837062	B_63	24806283	24942996	7
1A_24837089	1A	24837089	B_63	24806283	24942996	7
1A_24839776	1A	24839776	B_63	24806283	24942996	7
1A_24846648	1A	24846648	B_63	24806283	24942996	7
1A_24846859	1A	24846859	B_63	24806283	24942996	7
1A_24942996	1A	24942996	B_63	24806283	24942996	7
1A_24994330	1A	24994330	NA	NA	NA	NA
1A_25017622	1A	25017622	NA	NA	NA	NA
1A_25017641	1A	25017641	NA	NA	NA	NA
1A_25017973	1A	25017973	NA	NA	NA	NA
1A_25084727	1A	25084727	B_64	25084727	25085147	2
1A_25085147	1A	25085147	B_64	25084727	25085147	2
1A_25087109	1A	25087109	B_65	25087109	25096225	2
1A_25096225	1A	25096225	B_65	25087109	25096225	2
1A_25110059	1A	25110059	NA	NA	NA	NA
1A_25154028	1A	25154028	NA	NA	NA	NA
1A_25235877	1A	25235877	NA	NA	NA	NA
1A_25308034	1A	25308034	NA	NA	NA	NA
1A_25327718	1A	25327718	NA	NA	NA	NA
1A_25370077	1A	25370077	NA	NA	NA	NA
1A_25435530	1A	25435530	NA	NA	NA	NA
1A_25453154	1A	25453154	NA	NA	NA	NA
1A_25550500	1A	25550500	NA	NA	NA	NA
1A_25550769	1A	25550769	NA	NA	NA	NA
1A_25690092	1A	25690092	B_66	25690092	25690341	2
1A_25690341	1A	25690341	B_66	25690092	25690341	2
1A_26193863	1A	26193863	NA	NA	NA	NA
1A_26411157	1A	26411157	NA	NA	NA	NA
1A_26428932	1A	26428932	NA	NA	NA	NA
1A_26429261	1A	26429261	NA	NA	NA	NA
1A_26435728	1A	26435728	NA	NA	NA	NA
1A_26436047	1A	26436047	NA	NA	NA	NA
1A_26544209	1A	26544209	NA	NA	NA	NA
1A_26957028	1A	26957028	NA	NA	NA	NA
1A_27167046	1A	27167046	NA	NA	NA	NA
1A_27167057	1A	27167057	NA	NA	NA	NA
1A_27167375	1A	27167375	NA	NA	NA	NA
1A_27255713	1A	27255713	NA	NA	NA	NA
1A_27260146	1A	27260146	NA	NA	NA	NA
1A_27260155	1A	27260155	NA	NA	NA	NA
1A_27289224	1A	27289224	NA	NA	NA	NA
1A_27319041	1A	27319041	NA	NA	NA	NA
1A_27319102	1A	27319102	NA	NA	NA	NA
1A_27512154	1A	27512154	NA	NA	NA	NA
1A_27528848	1A	27528848	NA	NA	NA	NA
1A_27528886	1A	27528886	NA	NA	NA	NA
1A_28001851	1A	28001851	NA	NA	NA	NA
1A_28143215	1A	28143215	NA	NA	NA	NA
1A_28143241	1A	28143241	NA	NA	NA	NA
1A_28231450	1A	28231450	B_67	28231450	28232170	4
1A_28231468	1A	28231468	B_67	28231450	28232170	4
1A_28231690	1A	28231690	B_67	28231450	28232170	4
1A_28232170	1A	28232170	B_67	28231450	28232170	4
1A_28240739	1A	28240739	NA	NA	NA	NA
1A_28240760	1A	28240760	B_68	28240760	28240783	2
1A_28240783	1A	28240783	B_68	28240760	28240783	2
1A_28271537	1A	28271537	NA	NA	NA	NA
1A_28342597	1A	28342597	NA	NA	NA	NA
1A_28461621	1A	28461621	NA	NA	NA	NA
1A_28533242	1A	28533242	B_69	28533242	28578265	8
1A_28541930	1A	28541930	B_69	28533242	28578265	8
1A_28542184	1A	28542184	B_69	28533242	28578265	8
1A_28542222	1A	28542222	B_69	28533242	28578265	8
1A_28542232	1A	28542232	B_69	28533242	28578265	8
1A_28542254	1A	28542254	B_69	28533242	28578265	8
1A_28577302	1A	28577302	B_69	28533242	28578265	8
1A_28578265	1A	28578265	B_69	28533242	28578265	8
1A_28642637	1A	28642637	B_70	28642637	28667888	3
1A_28642845	1A	28642845	B_70	28642637	28667888	3
1A_28667888	1A	28667888	B_70	28642637	28667888	3
1A_28691211	1A	28691211	NA	NA	NA	NA
1A_28891562	1A	28891562	NA	NA	NA	NA
1A_29089728	1A	29089728	B_71	29089728	29089734	2
1A_29089734	1A	29089734	B_71	29089728	29089734	2
1A_29228750	1A	29228750	NA	NA	NA	NA
1A_29228754	1A	29228754	NA	NA	NA	NA
1A_29239100	1A	29239100	NA	NA	NA	NA
1A_29614893	1A	29614893	B_72	29614893	29615167	3
1A_29614922	1A	29614922	B_72	29614893	29615167	3
1A_29615167	1A	29615167	B_72	29614893	29615167	3
1A_29747266	1A	29747266	NA	NA	NA	NA
1A_30047754	1A	30047754	NA	NA	NA	NA
1A_30098481	1A	30098481	NA	NA	NA	NA
1A_30187776	1A	30187776	NA	NA	NA	NA
1A_30190807	1A	30190807	B_73	30190807	30191091	2
1A_30191091	1A	30191091	B_73	30190807	30191091	2
1A_30291401	1A	30291401	NA	NA	NA	NA
1A_30291624	1A	30291624	NA	NA	NA	NA
1A_30325619	1A	30325619	B_74	30325619	30325625	2
1A_30325625	1A	30325625	B_74	30325619	30325625	2
1A_30525359	1A	30525359	NA	NA	NA	NA
1A_30886092	1A	30886092	NA	NA	NA	NA
1A_30892198	1A	30892198	NA	NA	NA	NA
1A_31062910	1A	31062910	NA	NA	NA	NA
1A_31104425	1A	31104425	NA	NA	NA	NA
1A_31235389	1A	31235389	NA	NA	NA	NA
1A_31235390	1A	31235390	NA	NA	NA	NA
1A_31255586	1A	31255586	NA	NA	NA	NA
1A_31335210	1A	31335210	B_75	31335210	31335508	2
1A_31335508	1A	31335508	B_75	31335210	31335508	2
1A_31394774	1A	31394774	B_76	31394774	31394817	3
1A_31394778	1A	31394778	B_76	31394774	31394817	3
1A_31394817	1A	31394817	B_76	31394774	31394817	3
1A_31394828	1A	31394828	NA	NA	NA	NA
1A_31523001	1A	31523001	NA	NA	NA	NA
1A_31883562	1A	31883562	B_77	31883562	31883803	3
1A_31883793	1A	31883793	B_77	31883562	31883803	3
1A_31883803	1A	31883803	B_77	31883562	31883803	3
1A_32095340	1A	32095340	B_78	32095340	32095636	2
1A_32095636	1A	32095636	B_78	32095340	32095636	2
1A_32189576	1A	32189576	B_79	32189576	32189840	2
1A_32189622	1A	32189622	B_79	32189576	32189840	2
1A_32189840	1A	32189840	B_79	32189576	32189840	2
1A_32241487	1A	32241487	B_80	32241487	32241785	2
1A_32241541	1A	32241541	B_80	32241487	32241785	2
1A_32241785	1A	32241785	B_80	32241487	32241785	2
1A_32356006	1A	32356006	B_81	32356006	32551744	9
1A_32460687	1A	32460687	B_81	32356006	32551744	9
1A_32460918	1A	32460918	B_81	32356006	32551744	9
1A_32460976	1A	32460976	B_81	32356006	32551744	9
1A_32461391	1A	32461391	B_81	32356006	32551744	9
1A_32510218	1A	32510218	B_81	32356006	32551744	9
1A_32528599	1A	32528599	B_81	32356006	32551744	9
1A_32528790	1A	32528790	B_81	32356006	32551744	9
1A_32551744	1A	32551744	B_81	32356006	32551744	9
1A_32562117	1A	32562117	B_82	32562117	32570706	2
1A_32570706	1A	32570706	B_82	32562117	32570706	2
1A_32571005	1A	32571005	NA	NA	NA	NA
1A_32601412	1A	32601412	NA	NA	NA	NA
1A_32614724	1A	32614724	NA	NA	NA	NA
1A_32641951	1A	32641951	NA	NA	NA	NA
1A_32669947	1A	32669947	NA	NA	NA	NA
1A_32729053	1A	32729053	NA	NA	NA	NA
1A_32729572	1A	32729572	NA	NA	NA	NA
1A_32833987	1A	32833987	NA	NA	NA	NA
1A_32960560	1A	32960560	NA	NA	NA	NA
1A_33009477	1A	33009477	NA	NA	NA	NA
1A_33038398	1A	33038398	B_83	33038398	33058084	2
1A_33058084	1A	33058084	B_83	33038398	33058084	2
1A_33074975	1A	33074975	NA	NA	NA	NA
1A_33180077	1A	33180077	NA	NA	NA	NA
1A_33197394	1A	33197394	B_84	33197394	33290528	5
1A_33198303	1A	33198303	B_84	33197394	33290528	5
1A_33204077	1A	33204077	B_84	33197394	33290528	5
1A_33244839	1A	33244839	B_84	33197394	33290528	5
1A_33245161	1A	33245161	B_84	33197394	33290528	5
1A_33290528	1A	33290528	B_84	33197394	33290528	5
1A_33316053	1A	33316053	NA	NA	NA	NA
1A_33360898	1A	33360898	NA	NA	NA	NA
1A_33477556	1A	33477556	B_85	33477556	33539321	7
1A_33501338	1A	33501338	B_85	33477556	33539321	7
1A_33501339	1A	33501339	B_85	33477556	33539321	7
1A_33501346	1A	33501346	B_85	33477556	33539321	7
1A_33501618	1A	33501618	B_85	33477556	33539321	7
1A_33503248	1A	33503248	B_85	33477556	33539321	7
1A_33503320	1A	33503320	B_85	33477556	33539321	7
1A_33539321	1A	33539321	B_85	33477556	33539321	7
1A_34095620	1A	34095620	NA	NA	NA	NA
1A_34446870	1A	34446870	B_86	34446870	34459992	5
1A_34447113	1A	34447113	B_86	34446870	34459992	5
1A_34448274	1A	34448274	B_86	34446870	34459992	5
1A_34448281	1A	34448281	B_86	34446870	34459992	5
1A_34448566	1A	34448566	B_86	34446870	34459992	5
1A_34459992	1A	34459992	B_86	34446870	34459992	5
1A_34479536	1A	34479536	NA	NA	NA	NA
1A_34655318	1A	34655318	NA	NA	NA	NA
1A_34656657	1A	34656657	B_87	34656657	34665907	2
1A_34665907	1A	34665907	B_87	34656657	34665907	2
1A_34695935	1A	34695935	NA	NA	NA	NA
1A_34740308	1A	34740308	NA	NA	NA	NA
1A_34814250	1A	34814250	NA	NA	NA	NA
1A_34854307	1A	34854307	NA	NA	NA	NA
1A_34972677	1A	34972677	B_88	34972677	34972760	5
1A_34972710	1A	34972710	B_88	34972677	34972760	5
1A_34972718	1A	34972718	B_88	34972677	34972760	5
1A_34972735	1A	34972735	B_88	34972677	34972760	5
1A_34972760	1A	34972760	B_88	34972677	34972760	5
1A_35200443	1A	35200443	NA	NA	NA	NA
1A_35528514	1A	35528514	B_89	35528514	35528543	2
1A_35528543	1A	35528543	B_89	35528514	35528543	2
1A_35568240	1A	35568240	NA	NA	NA	NA
1A_35568297	1A	35568297	NA	NA	NA	NA
1A_36158360	1A	36158360	NA	NA	NA	NA
1A_36159057	1A	36159057	NA	NA	NA	NA
1A_36159301	1A	36159301	NA	NA	NA	NA
1A_36159306	1A	36159306	NA	NA	NA	NA
1A_36183652	1A	36183652	NA	NA	NA	NA
1A_36305141	1A	36305141	NA	NA	NA	NA
1A_36326517	1A	36326517	NA	NA	NA	NA
1A_36415411	1A	36415411	NA	NA	NA	NA
1A_36561534	1A	36561534	NA	NA	NA	NA
1A_36614718	1A	36614718	NA	NA	NA	NA
1A_36614727	1A	36614727	NA	NA	NA	NA
1A_36614797	1A	36614797	NA	NA	NA	NA
1A_36732261	1A	36732261	NA	NA	NA	NA
1A_36858841	1A	36858841	B_90	36858841	36961718	5
1A_36931968	1A	36931968	B_90	36858841	36961718	5
1A_36952001	1A	36952001	B_90	36858841	36961718	5
1A_36961469	1A	36961469	B_90	36858841	36961718	5
1A_36961718	1A	36961718	B_90	36858841	36961718	5
1A_36961806	1A	36961806	NA	NA	NA	NA
1A_37245756	1A	37245756	NA	NA	NA	NA
1A_37246545	1A	37246545	B_91	37246545	37275520	9
1A_37246546	1A	37246546	B_91	37246545	37275520	9
1A_37269751	1A	37269751	B_91	37246545	37275520	9
1A_37269808	1A	37269808	B_91	37246545	37275520	9
1A_37269843	1A	37269843	B_91	37246545	37275520	9
1A_37275228	1A	37275228	B_91	37246545	37275520	9
1A_37275263	1A	37275263	B_91	37246545	37275520	9
1A_37275516	1A	37275516	B_91	37246545	37275520	9
1A_37275520	1A	37275520	B_91	37246545	37275520	9
1A_37302517	1A	37302517	B_92	37302517	37302867	4
1A_37302821	1A	37302821	B_92	37302517	37302867	4
1A_37302824	1A	37302824	B_92	37302517	37302867	4
1A_37302867	1A	37302867	B_92	37302517	37302867	4
1A_37389005	1A	37389005	B_93	37389005	37416567	3
1A_37393621	1A	37393621	B_93	37389005	37416567	3
1A_37416567	1A	37416567	B_93	37389005	37416567	3
1A_37435994	1A	37435994	NA	NA	NA	NA
1A_37436313	1A	37436313	NA	NA	NA	NA
1A_37471385	1A	37471385	NA	NA	NA	NA
1A_37570850	1A	37570850	NA	NA	NA	NA
1A_38034126	1A	38034126	NA	NA	NA	NA
1A_38035327	1A	38035327	NA	NA	NA	NA
1A_38080287	1A	38080287	NA	NA	NA	NA
1A_38080958	1A	38080958	NA	NA	NA	NA
1A_38265710	1A	38265710	NA	NA	NA	NA
1A_38327368	1A	38327368	NA	NA	NA	NA
1A_38327400	1A	38327400	NA	NA	NA	NA
1A_38359333	1A	38359333	NA	NA	NA	NA
1A_38359342	1A	38359342	NA	NA	NA	NA
1A_38359351	1A	38359351	NA	NA	NA	NA
1A_38477799	1A	38477799	NA	NA	NA	NA
1A_38477815	1A	38477815	NA	NA	NA	NA
1A_38855167	1A	38855167	NA	NA	NA	NA
1A_39098933	1A	39098933	NA	NA	NA	NA
1A_39212323	1A	39212323	NA	NA	NA	NA
1A_39387090	1A	39387090	NA	NA	NA	NA
1A_39421116	1A	39421116	NA	NA	NA	NA
1A_39496069	1A	39496069	NA	NA	NA	NA
1A_39500476	1A	39500476	NA	NA	NA	NA
1A_39702189	1A	39702189	B_94	39702189	39707959	2
1A_39707959	1A	39707959	B_94	39702189	39707959	2
1A_39759095	1A	39759095	NA	NA	NA	NA
1A_40040339	1A	40040339	NA	NA	NA	NA
1A_40174583	1A	40174583	B_95	40174583	40174924	3
1A_40174912	1A	40174912	B_95	40174583	40174924	3
1A_40174924	1A	40174924	B_95	40174583	40174924	3
1A_40346934	1A	40346934	NA	NA	NA	NA
1A_40346945	1A	40346945	NA	NA	NA	NA
1A_40347095	1A	40347095	NA	NA	NA	NA
1A_40347222	1A	40347222	NA	NA	NA	NA
1A_40347228	1A	40347228	NA	NA	NA	NA
1A_40347248	1A	40347248	NA	NA	NA	NA
1A_40347275	1A	40347275	NA	NA	NA	NA
1A_40347291	1A	40347291	NA	NA	NA	NA
1A_40379296	1A	40379296	NA	NA	NA	NA
1A_40468946	1A	40468946	NA	NA	NA	NA
1A_40512453	1A	40512453	NA	NA	NA	NA
1A_40512634	1A	40512634	NA	NA	NA	NA
1A_40550441	1A	40550441	NA	NA	NA	NA
1A_40559115	1A	40559115	NA	NA	NA	NA
1A_40569218	1A	40569218	NA	NA	NA	NA
1A_40569283	1A	40569283	NA	NA	NA	NA
1B_193603	1B	193603	NA	NA	NA	NA
1B_312140	1B	312140	NA	NA	NA	NA
1B_718055	1B	718055	NA	NA	NA	NA
1B_736571	1B	736571	NA	NA	NA	NA
1B_736575	1B	736575	NA	NA	NA	NA
1B_829935	1B	829935	NA	NA	NA	NA
1B_1049583	1B	1049583	NA	NA	NA	NA
1B_1125503	1B	1125503	NA	NA	NA	NA
1B_1175130	1B	1175130	NA	NA	NA	NA
1B_1217502	1B	1217502	NA	NA	NA	NA
1B_1283812	1B	1283812	NA	NA	NA	NA
1B_1293143	1B	1293143	NA	NA	NA	NA
1B_1531410	1B	1531410	NA	NA	NA	NA
1B_1533558	1B	1533558	NA	NA	NA	NA
1B_1548116	1B	1548116	NA	NA	NA	NA
1B_1548155	1B	1548155	NA	NA	NA	NA
1B_1625854	1B	1625854	NA	NA	NA	NA
1B_1632317	1B	1632317	NA	NA	NA	NA
1B_1689790	1B	1689790	NA	NA	NA	NA
1B_1725967	1B	1725967	NA	NA	NA	NA
1B_1808456	1B	1808456	NA	NA	NA	NA
1B_1836051	1B	1836051	B_96	1836051	1894598	5
1B_1836298	1B	1836298	B_96	1836051	1894598	5
1B_1871794	1B	1871794	B_96	1836051	1894598	5
1B_1877371	1B	1877371	B_96	1836051	1894598	5
1B_1894598	1B	1894598	B_96	1836051	1894598	5
1B_2077502	1B	2077502	NA	NA	NA	NA
1B_2083881	1B	2083881	NA	NA	NA	NA
1B_2126791	1B	2126791	B_97	2126791	2126846	2
1B_2126846	1B	2126846	B_97	2126791	2126846	2
1B_2202974	1B	2202974	NA	NA	NA	NA
1B_2220641	1B	2220641	NA	NA	NA	NA
1B_2235792	1B	2235792	NA	NA	NA	NA
1B_2242781	1B	2242781	NA	NA	NA	NA
1B_2243827	1B	2243827	NA	NA	NA	NA
1B_2244257	1B	2244257	NA	NA	NA	NA
1B_2244528	1B	2244528	NA	NA	NA	NA
1B_2244574	1B	2244574	NA	NA	NA	NA
1B_2244579	1B	2244579	NA	NA	NA	NA
1B_2303358	1B	2303358	NA	NA	NA	NA
1B_2349528	1B	2349528	NA	NA	NA	NA
1B_2352800	1B	2352800	NA	NA	NA	NA
1B_2363700	1B	2363700	B_98	2363700	2374317	3
1B_2373982	1B	2373982	B_98	2363700	2374317	3
1B_2374317	1B	2374317	B_98	2363700	2374317	3
1B_2420262	1B	2420262	NA	NA	NA	NA
1B_2420468	1B	2420468	NA	NA	NA	NA
1B_2420516	1B	2420516	NA	NA	NA	NA
1B_2468455	1B	2468455	NA	NA	NA	NA
1B_2574148	1B	2574148	NA	NA	NA	NA
1B_2660340	1B	2660340	NA	NA	NA	NA
1B_2780892	1B	2780892	NA	NA	NA	NA
1B_2838037	1B	2838037	NA	NA	NA	NA
1B_2928747	1B	2928747	NA	NA	NA	NA
1B_2943941	1B	2943941	NA	NA	NA	NA
1B_3058292	1B	3058292	NA	NA	NA	NA
1B_3131199	1B	3131199	NA	NA	NA	NA
1B_3131514	1B	3131514	NA	NA	NA	NA
1B_3131854	1B	3131854	NA	NA	NA	NA
1B_3239676	1B	3239676	NA	NA	NA	NA
1B_3261737	1B	3261737	NA	NA	NA	NA
1B_3289186	1B	3289186	B_99	3289186	3289989	6
1B_3289504	1B	3289504	B_99	3289186	3289989	6
1B_3289565	1B	3289565	B_99	3289186	3289989	6
1B_3289660	1B	3289660	B_99	3289186	3289989	6
1B_3289938	1B	3289938	B_99	3289186	3289989	6
1B_3289989	1B	3289989	B_99	3289186	3289989	6
1B_3444087	1B	3444087	NA	NA	NA	NA
1B_3444107	1B	3444107	NA	NA	NA	NA
1B_3444425	1B	3444425	NA	NA	NA	NA
1B_3444645	1B	3444645	NA	NA	NA	NA
1B_3479107	1B	3479107	NA	NA	NA	NA
1B_3490143	1B	3490143	NA	NA	NA	NA
1B_3490632	1B	3490632	NA	NA	NA	NA
1B_3596123	1B	3596123	NA	NA	NA	NA
1B_3728204	1B	3728204	NA	NA	NA	NA
1B_3728904	1B	3728904	NA	NA	NA	NA
1B_3845727	1B	3845727	NA	NA	NA	NA
1B_4369275	1B	4369275	NA	NA	NA	NA
1B_4827324	1B	4827324	NA	NA	NA	NA
1B_4827381	1B	4827381	NA	NA	NA	NA
1B_4839506	1B	4839506	NA	NA	NA	NA
1B_4840511	1B	4840511	B_100	4840511	4864018	3
1B_4863673	1B	4863673	B_100	4840511	4864018	3
1B_4864018	1B	4864018	B_100	4840511	4864018	3
1B_5012508	1B	5012508	NA	NA	NA	NA
1B_5295881	1B	5295881	NA	NA	NA	NA
1B_5425931	1B	5425931	B_101	5425931	5425932	2
1B_5425932	1B	5425932	B_101	5425931	5425932	2
1B_5485074	1B	5485074	B_102	5485074	5485327	2
1B_5485327	1B	5485327	B_102	5485074	5485327	2
1B_5572434	1B	5572434	B_103	5572434	5578537	2
1B_5578537	1B	5578537	B_103	5572434	5578537	2
1B_5628701	1B	5628701	NA	NA	NA	NA
1B_5629069	1B	5629069	NA	NA	NA	NA
1B_5728657	1B	5728657	NA	NA	NA	NA
1B_5763711	1B	5763711	B_104	5763711	5767711	2
1B_5767487	1B	5767487	B_104	5763711	5767711	2
1B_5767711	1B	5767711	B_104	5763711	5767711	2
1B_5815567	1B	5815567	NA	NA	NA	NA
1B_5815600	1B	5815600	NA	NA	NA	NA
1B_5830927	1B	5830927	NA	NA	NA	NA
1B_5888192	1B	5888192	NA	NA	NA	NA
1B_5979026	1B	5979026	NA	NA	NA	NA
1B_6104418	1B	6104418	NA	NA	NA	NA
1B_6327257	1B	6327257	B_105	6327257	6327260	2
1B_6327260	1B	6327260	B_105	6327257	6327260	2
1B_6447187	1B	6447187	NA	NA	NA	NA
1B_6497689	1B	6497689	NA	NA	NA	NA
1B_6575327	1B	6575327	NA	NA	NA	NA
1B_6575536	1B	6575536	NA	NA	NA	NA
1B_6575583	1B	6575583	NA	NA	NA	NA
1B_6612908	1B	6612908	NA	NA	NA	NA
1B_6626702	1B	6626702	NA	NA	NA	NA
1B_6675876	1B	6675876	NA	NA	NA	NA
1B_6681290	1B	6681290	B_106	6681290	6681304	2
1B_6681304	1B	6681304	B_106	6681290	6681304	2
1B_6749957	1B	6749957	NA	NA	NA	NA
1B_6863579	1B	6863579	NA	NA	NA	NA
1B_6998675	1B	6998675	B_107	6998675	6998696	2
1B_6998696	1B	6998696	B_107	6998675	6998696	2
1B_7254865	1B	7254865	NA	NA	NA	NA
1B_7348186	1B	7348186	NA	NA	NA	NA
1B_7348443	1B	7348443	NA	NA	NA	NA
1B_7348458	1B	7348458	NA	NA	NA	NA
1B_7384361	1B	7384361	NA	NA	NA	NA
1B_7384595	1B	7384595	NA	NA	NA	NA
1B_7414311	1B	7414311	NA	NA	NA	NA
1B_7414324	1B	7414324	NA	NA	NA	NA
1B_7510133	1B	7510133	NA	NA	NA	NA
1B_7559952	1B	7559952	NA	NA	NA	NA
1B_7680273	1B	7680273	NA	NA	NA	NA
1B_7687143	1B	7687143	NA	NA	NA	NA
1B_7746296	1B	7746296	B_108	7746296	7746324	2
1B_7746324	1B	7746324	B_108	7746296	7746324	2
1B_7775239	1B	7775239	NA	NA	NA	NA
1B_7808551	1B	7808551	NA	NA	NA	NA
1B_7829494	1B	7829494	NA	NA	NA	NA
1B_7845879	1B	7845879	NA	NA	NA	NA
1B_7917566	1B	7917566	NA	NA	NA	NA
1B_7951707	1B	7951707	NA	NA	NA	NA
1B_7964039	1B	7964039	NA	NA	NA	NA
1B_7964725	1B	7964725	NA	NA	NA	NA
1B_7964796	1B	7964796	NA	NA	NA	NA
1B_8002735	1B	8002735	NA	NA	NA	NA
1B_8009732	1B	8009732	NA	NA	NA	NA
1B_8097114	1B	8097114	NA	NA	NA	NA
1B_8300597	1B	8300597	B_109	8300597	8300640	2
1B_8300640	1B	8300640	B_109	8300597	8300640	2
1B_8304377	1B	8304377	NA	NA	NA	NA
1B_8304392	1B	8304392	NA	NA	NA	NA
1B_8304405	1B	8304405	NA	NA	NA	NA
1B_8343276	1B	8343276	NA	NA	NA	NA
1B_8343278	1B	8343278	NA	NA	NA	NA
1B_8369219	1B	8369219	NA	NA	NA	NA
1B_8369502	1B	8369502	NA	NA	NA	NA
1B_8508529	1B	8508529	NA	NA	NA	NA
[truncated: 10,154 more rows]

## Sheet: Supplemental File 1D
				Trait	Location	Cluster	Location_Cluster	Gender	Location_Gender	Gender_Cluster	Location_Gender_Cluster
				PA	0.1383	0	0.0227	0	0	0.7794	0.9969
				OA	0.3165	0	0.3922	0	0.0009	0.7469	0.5207
				DH	0.1046	0	0.9987	NA	NA	NA	NA
				DM	0.2877	0	0.9976	NA	NA	NA	NA
				PH	0	0	0.0317	NA	NA	NA	NA
				PL	0	0	0	NA	NA	NA	NA
				PBPM	0.4135	0	0.0659	NA	NA	NA	NA
				TT	0	0	0.1622	NA	NA	NA	NA
				CLF	0	0	0.188	NA	NA	NA	NA
				CDF	0	0	0.0124	NA	NA	NA	NA
				PW	0	0	0.0491	NA	NA	NA	NA
				PY	0	0	0.22	NA	NA	NA	NA
				GY	0	0	0.5012	NA	NA	NA	NA
				BY	0	0	0.9063	NA	NA	NA	NA
				HI	0.0211	0.0043	0.4419	NA	NA	NA	NA
				GFP	0.4915	0	0.9848	NA	NA	NA	NA
				GFR	0	0	0.422	NA	NA	NA	NA
				BPR	0	0	0.9712	NA	NA	NA	NA

## Sheet: Supplemental File 1C
Source	Trait	Component	Std.error	Z.ratio	perc.var
REP	BPR.Adet	0.0495596	0.362173	0.13684	0.0184804
ID	BPR.Adet	177.127	15.3185	11.5629	66.0492
units!R	BPR.Adet	90.9974	6.13513	14.8322	33.9323
REP	BPR.Akaki	7.73375e-06	NA	NA	3.74701e-06
ID	BPR.Akaki	129.972	11.6268	11.1787	62.9716
units!R	BPR.Akaki	76.4258	5.14683	14.8491	37.0284
REP	BPR	0.0888267	0.229822	0.386502	0.00923322
LOCATION	BPR	724.699	1013.41	0.715108	75.3299
ID	BPR	172.27	12.7253	13.5375	17.9068
ID:LOCATION	BPR	6.57514e-06	NA	NA	6.83462e-07
units!R	BPR	64.9763	2.52825	25.7001	6.75405
REP	BY.Adet	0.0766727	NA	NA	2.84823e-06
ID	BY.Adet	1.93425e+06	158003	12.2419	71.8534
units!R	BY.Adet	757688	51026.5	14.8489	28.1466
REP	BY.Akaki	0.0680508	NA	NA	3.35044e-06
ID	BY.Akaki	1.35861e+06	116480	11.6639	66.8905
units!R	BY.Akaki	672486	45288.2	14.849	33.1095
REP	BY	0.0559936	NA	NA	6.03609e-07
LOCATION	BY	6.91486e+06	9.67748e+06	0.714531	74.5418
ID	BY	1.80829e+06	131352	13.7668	19.4933
ID:LOCATION	BY	0.0559936	NA	NA	6.03609e-07
units!R	BY	553336	21522.3	25.7099	5.96493
REP	CDF.Adet	3.0939e-09	NA	NA	1.05037e-06
ID	CDF.Adet	0.263979	0.0188563	13.9996	89.6201
units!R	CDF.Adet	0.0305743	0.00205898	14.8492	10.3799
REP	CDF.Akaki	1.57366e-09	NA	NA	8.32158e-07
ID	CDF.Akaki	0.173555	0.0122365	14.1834	91.7765
units!R	CDF.Akaki	0.0155511	0.00104727	14.8492	8.22348
REP	CDF	2.33378e-09	NA	NA	7.80216e-07
LOCATION	CDF	0.0572897	0.0816141	0.701958	19.1528
ID	CDF	0.0222627	0.0110302	2.01834	7.44275
ID:LOCATION	CDF	0.196505	0.0140365	13.9995	65.6943
units!R	CDF	0.0230627	0.00109822	21	7.71019
REP	CLF.Adet	0.108696	0.155462	0.699183	3.56036
ID	CLF.Adet	2.401	0.181117	13.2566	78.6449
units!R	CLF.Adet	0.543267	0.0366271	14.8324	17.7948
REP	CLF.Akaki	0.0017821	0.00314309	0.56699	0.23593
ID	CLF.Akaki	0.559422	0.0447357	12.5051	74.0612
units!R	CLF.Akaki	0.194147	0.0130897	14.832	25.7028
REP	CLF	0.0197647	0.0285995	0.691085	0.595121
LOCATION	CLF	1.43472	2.00165	0.716767	43.1997
ID	CLF	0.201856	0.0799362	2.52522	6.07794
ID:LOCATION	CLF	1.26061	0.0990844	12.7226	37.9573
units!R	CLF	0.404179	0.0192576	20.988	12.1699
REP	DH.Adet	0.00405071	0.0193864	0.208946	0.00429467
ID	DH.Adet	45.3704	3.20554	14.1538	48.1029
units!R	DH.Adet	4.25559	0.286912	14.8324	4.51188
REP	DH.Akaki	0.000912183	0.0110082	0.0828637	0.00096712
ID	DH.Akaki	41.6611	2.91263	14.3036	44.1702
units!R	DH.Akaki	3.02743	0.204109	14.8324	3.20976
REP	DH	0.0066915	0.0148933	0.449297	0.0141447
LOCATION	DH	0.145484	0.211175	0.688927	0.307528
ID	DH	43.7694	3.00818	14.5501	92.5208
ID:LOCATION	DH	3.42647e-07	NA	NA	7.24296e-07
units!R	DH	3.38608	0.131753	25.7002	7.15757
REP	DM.Adet	0.0525304	0.100198	0.524269	0.122331
ID	DM.Adet	34.8121	2.63341	13.2194	81.0689
units!R	DM.Adet	8.07672	0.544532	14.8324	18.8087
REP	DM.Akaki	0.0586529	0.10757	0.545254	0.155823
ID	DM.Akaki	29.9061	2.28969	13.0612	79.4513
units!R	DM.Akaki	7.67604	0.517519	14.8324	20.3929
REP	DM	0.067263	0.103845	0.647728	0.166643
LOCATION	DM	0.0638282	0.098987	0.644814	0.158133
ID	DM	34.7942	2.43803	14.2714	86.2019
ID:LOCATION	DM	5.50319e-07	NA	NA	1.36341e-06
units!R	DM	5.43832	0.211606	25.7002	13.4733
REP	GFP.Adet	0.125292	0.207694	0.603251	0.456394
ID	GFP.Adet	17.8162	1.55509	11.4567	64.8983
units!R	GFP.Adet	9.511	0.641239	14.8322	34.6453
REP	GFP.Akaki	0.112193	0.187365	0.598792	0.361133
ID	GFP.Akaki	22.0065	1.81042	12.1554	70.8357
units!R	GFP.Akaki	8.94827	0.603305	14.8321	28.8032
REP	GFP	0.131509	0.197391	0.666235	0.449224
LOCATION	GFP	0.00678306	0.0210035	0.32295	0.0231704
ID	GFP	22.0213	1.606	13.7119	75.2233
ID:LOCATION	GFP	7.19986e-07	NA	NA	2.45942e-06
units!R	GFP	7.11499	0.276847	25.7001	24.3043
REP	GFR.Adet	0.288916	0.469099	0.615896	0.263794
ID	GFR.Adet	90.3684	6.75861	13.3709	82.5105
units!R	GFR.Adet	18.8662	1.27196	14.8324	17.2257
REP	GFR.Akaki	0.193974	0.309588	0.626554	0.258041
ID	GFR.Akaki	63.9815	4.69896	13.6161	85.1138
units!R	GFR.Akaki	10.9963	0.741369	14.8324	14.6282
REP	GFR	0.255472	0.385213	0.663198	0.115741
LOCATION	GFR	128.372	179.204	0.716347	58.1588
ID	GFR	72.6107	5.31646	13.6577	32.8961
ID:LOCATION	GFR	4.57164	0.885523	5.16265	2.07117
units!R	GFR	14.9173	0.710753	20.988	6.75824
REP	GY.Adet	176.729	323.192	0.546823	0.117187
ID	GY.Adet	127793	9417.26	13.5701	84.7385
units!R	GY.Adet	22839	1539.8	14.8324	15.1443
REP	GY.Akaki	231.921	383.86	0.604181	0.181882
ID	GY.Akaki	109860	8015.52	13.7059	86.1562
units!R	GY.Akaki	17420.6	1174.49	14.8324	13.6619
REP	GY	226.718	352.875	0.642488	0.0533076
LOCATION	GY	286126	379329	0.754295	67.2761
ID	GY	108952	8046.06	13.5411	25.6177
ID:LOCATION	GY	9888.35	1427.32	6.92793	2.32502
units!R	GY	20107.9	958.075	20.9878	4.72792
REP	HI.Adet	5.7978e-07	1.63054e-06	0.355575	0.109995
ID	HI.Adet	0.000273242	2.82792e-05	9.66232	51.8389
units!R	HI.Adet	0.000253277	1.7076e-05	14.8323	48.0511
REP	HI.Akaki	5.79066e-06	1.06325e-05	0.544617	0.288569
ID	HI.Akaki	0.00123921	0.000112195	11.0451	61.7541
units!R	HI.Akaki	0.000761683	5.13531e-05	14.8323	37.9574
REP	HI	3.06521e-06	5.14882e-06	0.595323	0.241261
LOCATION	HI	3.68532e-06	6.62671e-06	0.556132	0.29007
ID	HI	0.00056885	5.52594e-05	10.2942	44.7738
ID:LOCATION	HI	0.000187303	3.21034e-05	5.83437	14.7425
units!R	HI	0.000507592	2.41848e-05	20.9881	39.9523
REP	OA.Adet	0.00122218	0.00229408	0.532753	0.0780178
F_TYPE	OA.Adet	0.065249	0.0928656	0.702617	4.16517
ID	OA.Adet	0.617768	0.0476362	12.9685	39.4353
units!R	OA.Adet	0.882297	0.0198107	44.5364	56.3215
REP	OA.Adet.M	0.00299435	0.00526867	0.568331	0.198705
ID	OA.Adet.M	0.536648	0.0472998	11.3457	35.612
units!R	OA.Adet.M	0.967289	0.0291384	33.1964	64.1893
REP	OA.Adet.W	7.63414e-08	NA	NA	5.11159e-06
ID	OA.Adet.W	0.739082	0.0629729	11.7365	49.4867
units!R	OA.Adet.W	0.754414	0.0293322	25.7196	50.5133
REP	OA.Akaki	0.00311539	0.00519513	0.599674	0.222947
F_TYPE	OA.Akaki	0.0108455	0.0161272	0.672499	0.776139
ID	OA.Akaki	0.891172	0.0685459	13.0011	63.775
units!R	OA.Akaki	0.492236	0.019153	25.7002	35.2259
REP	OA.Akaki.M	0.00487631	0.007828	0.622932	0.349554
ID	OA.Akaki.M	1.09959	0.0844982	13.0132	78.8232
units!R	OA.Akaki.M	0.290543	0.0195884	14.8324	20.8273
REP	OA.Akaki.W	0.000467121	0.00310227	0.150574	0.0339105
ID	OA.Akaki.W	0.616332	0.0719231	8.56932	44.7424
units!R	OA.Akaki.W	0.760714	0.0512874	14.8324	55.2237
LOCATION	OA	1.26133e-06	NA	NA	8.32063e-05
F_TYPE	OA	0.0312629	0.0483062	0.647182	2.06233
F_TYPE:LOCATION	OA	0.00520088	0.00590843	0.880248	0.343088
ID	OA	0.625101	0.0488606	12.7936	41.2362
ID:LOCATION	OA	0.0660081	0.0138415	4.76884	4.35437
units!R	OA	0.78833	0.0153373	51.3997	52.0039
LOCATION	OA.M	0.00487596	0.00781665	0.623791	0.328993
ID	OA.M	0.615625	0.0488433	12.6041	41.5377
ID:LOCATION	OA.M	4.90243e-07	NA	NA	3.30779e-05
units!R	OA.M	0.861585	0.0219339	39.281	58.1333
LOCATION	OA.W	0.00484836	0.00798062	0.607516	0.332885
ID	OA.W	0.630899	0.055057	11.459	43.3171
ID:LOCATION	OA.W	0.0682785	0.0249361	2.73814	4.68796
units!R	OA.W	0.75244	0.0251816	29.8805	51.662
REP	PA.Adet	0.000649021	0.0014082	0.460887	0.0531585
F_TYPE	PA.Adet	0.174215	0.246889	0.705644	14.2692
ID	PA.Adet	0.281552	0.0241974	11.6356	23.0607
units!R	PA.Adet	0.7645	0.0171657	44.5365	62.6169
REP	PA.Adet.M	0.00148064	0.0029761	0.49751	0.133089
ID	PA.Adet.M	0.236011	0.0261161	9.03697	21.214
units!R	PA.Adet.M	0.875032	0.0263593	33.1963	78.6529
REP	PA.Adet.W	7.16222e-08	NA	NA	7.55461e-06
ID	PA.Adet.W	0.240281	0.0289581	8.29752	25.3445
units!R	PA.Adet.W	0.707779	0.027519	25.7196	74.6555
REP	PA.Akaki	0.00961402	0.0144306	0.666223	0.985756
F_TYPE	PA.Akaki	0.10266	0.146017	0.703066	10.526
ID	PA.Akaki	0.342586	0.0322687	10.6167	35.1264
units!R	PA.Akaki	0.520434	0.0202502	25.7002	53.3618
REP	PA.Akaki.M	0.00506741	0.00916243	0.553064	0.69013
ID	PA.Akaki.M	0.10674	0.0351338	3.03811	14.5369
units!R	PA.Akaki.M	0.622461	0.0419663	14.8324	84.7729
REP	PA.Akaki.W	0.0129778	0.0202726	0.640164	1.28492
ID	PA.Akaki.W	0.208319	0.0485585	4.29007	20.6254
units!R	PA.Akaki.W	0.788714	0.0531757	14.8322	78.0896
LOCATION	PA	1.12891e-06	NA	NA	0.000103312
F_TYPE	PA	1.12891e-06	NA	NA	0.000103312
F_TYPE:LOCATION	PA	0.0965844	0.0793964	1.21648	8.83889
ID	PA	0.160296	0.0208971	7.67074	14.6694
ID:LOCATION	PA	0.13027	0.0169269	7.69601	11.9216
units!R	PA	0.705569	0.0136994	51.5037	64.5699
LOCATION	PA.M	0.082917	0.118239	0.701266	7.56292
ID	PA.M	0.166127	0.0231892	7.16398	15.1525
ID:LOCATION	PA.M	0.0331538	0.019619	1.68989	3.02398
units!R	PA.M	0.814164	0.0218797	37.211	74.2606
LOCATION	PA.W	0.201741	0.285293	0.707137	17.2675
ID	PA.W	0.175577	0.0251183	6.99003	15.0281
ID:LOCATION	PA.W	0.0595716	0.0232604	2.56108	5.09889
units!R	PA.W	0.731435	0.0244176	29.9553	62.6054
REP	PBPM.Adet	0.0197365	0.0480872	0.410432	0.091999
ID	PBPM.Adet	15.1421	1.25092	12.1047	70.5828
units!R	PBPM.Adet	6.29112	0.424156	14.8321	29.3252
REP	PBPM.Akaki	0.768445	1.09745	0.700209	5.35316
ID	PBPM.Akaki	10.2484	0.811316	12.6318	71.3924
units!R	PBPM.Akaki	3.33818	0.22506	14.8324	23.2545
REP	PBPM	0.115512	0.171525	0.673441	0.650519
LOCATION	PBPM	5.15386e-07	NA	NA	2.90245e-06
ID	PBPM	6.51623	0.783685	8.31485	36.6969
ID:LOCATION	PBPM	6.03207	0.590318	10.2183	33.9702
units!R	PBPM	5.09311	0.242666	20.9881	28.6824
REP	PH.Adet	2.48643	3.61699	0.687431	1.1361
ID	PH.Adet	184.987	13.571	13.631	84.5243
units!R	PH.Adet	31.3832	2.11585	14.8324	14.3396
REP	PH.Akaki	1.03769	1.50839	0.687941	1.34635
ID	PH.Akaki	63.2879	4.71625	13.4191	82.1129
units!R	PH.Akaki	12.7487	0.859515	14.8324	16.5408
REP	PH	0.0532726	0.113469	0.469491	0.00728913
LOCATION	PH	583.736	781.305	0.74713	79.8708
ID	PH	59.7358	7.04542	8.47867	8.17346
ID:LOCATION	PH	63.5499	5.1175	12.4182	8.69534
units!R	PH	23.7752	1.13281	20.9879	3.25309
REP	PL.Adet	1.48961e-06	NA	NA	2.10655e-06
ID	PL.Adet	55.993	4.29994	13.0218	79.1829
units!R	PL.Adet	14.7205	0.991332	14.8492	20.8171
REP	PL.Akaki	0.112442	0.177749	0.632589	0.605903
ID	PL.Akaki	12.6051	1.06497	11.8361	67.9236
units!R	PL.Akaki	5.84023	0.393755	14.8322	31.4705
REP	PL	0.0075702	0.0272734	0.277567	0.00947548
LOCATION	PL	35.2811	49.012	0.719847	44.1608
ID	PL	16.3709	2.03575	8.0417	20.4911
ID:LOCATION	PL	17.9039	1.57462	11.3703	22.41
units!R	PL	10.329	0.492139	20.988	12.9286
REP	PW.Adet	9.17008e-09	NA	NA	1.92839e-06
ID	PW.Adet	0.38491	0.0291655	13.1975	80.9434
units!R	PW.Adet	0.0906198	0.00610266	14.8492	19.0566
REP	PW.Akaki	3.93905e-09	NA	NA	2.11971e-06
ID	PW.Akaki	0.146904	0.0112928	13.0087	79.0528
units!R	PW.Akaki	0.0389262	0.00262143	14.8492	20.9472
REP	PW	6.55472e-09	NA	NA	9.75904e-07
LOCATION	PW	0.340968	0.455728	0.748185	50.7653
ID	PW	0.0962929	0.0149437	6.44373	14.3366
ID:LOCATION	PW	0.16962	0.0137065	12.3751	25.254
units!R	PW	0.0647745	0.00308454	20.9998	9.644
REP	PY.Adet	7.75431e-09	NA	NA	1.45753e-06
ID	PY.Adet	0.455388	0.0333853	13.6404	85.5965
units!R	PY.Adet	0.076629	0.00516047	14.8492	14.4035
REP	PY.Akaki	2.43229e-09	NA	NA	1.61172e-06
ID	PY.Akaki	0.126877	0.0093992	13.4987	84.0728
units!R	PY.Akaki	0.0240362	0.00161868	14.8492	15.9272
REP	PY	5.09335e-09	NA	NA	8.34901e-07
LOCATION	PY	0.268586	0.371744	0.722502	44.0266
ID	PY	0.0826664	0.0155856	5.30401	13.5507
ID:LOCATION	PY	0.208469	0.0157973	13.1965	34.1721
units!R	PY	0.0503331	0.00239682	20.9999	8.25059
REP	TT.Adet	0.15145	0.220392	0.687187	1.79577
ID	TT.Adet	4.07714	0.440091	9.26431	48.3434
units!R	TT.Adet	4.20512	0.283513	14.8322	49.8609
REP	TT.Akaki	3.37352e-06	NA	NA	9.20214e-05
ID	TT.Akaki	1.55756	0.189859	8.20378	42.4865
units!R	TT.Akaki	2.10845	0.141991	14.8492	57.5134
REP	TT	0.0366087	0.0568971	0.643419	0.457563
LOCATION	TT	1.9706	2.79252	0.705673	24.6301
ID	TT	0.79798	0.21298	3.74674	9.97374
ID:LOCATION	TT	1.99974	0.254224	7.86605	24.9942
units!R	TT	3.19588	0.152271	20.9881	39.9444

## Sheet: Supplemental File 1E
SNP_ID	CHROM	POS	REF	ALT	Effect	SE	pvalue	trait	n_PC	qvalue
10A_200099	10A	200099	C	T	6.55621	5.82398	0.261228	bio13	10	0.999622
10A_208593	10A	208593	A	C	18.8423	8.80699	0.0332471	bio13	10	0.999622
10A_379785	10A	379785	A	G	1.4616	5.84543	0.802736	bio13	10	0.999622
10A_381686	10A	381686	G	A	1.4616	5.84543	0.802736	bio13	10	0.999622
10A_381701	10A	381701	C	T	1.22163	4.9811	0.806438	bio13	10	0.999622
10A_800200	10A	800200	T	C	0.82843	5.03136	0.869334	bio13	10	0.999622
10A_800292	10A	800292	A	G	-1.24426	5.14926	0.809233	bio13	10	0.999622
10A_822439	10A	822439	G	A	-4.28208	5.10062	0.40188	bio13	10	0.999622
10A_822474	10A	822474	G	A	3.34516	6.39265	0.601184	bio13	10	0.999622
10A_935469	10A	935469	C	G	4.7948	6.80475	0.481619	bio13	10	0.999622
10A_994536	10A	994536	T	C	-1.61088	10.1246	0.873699	bio13	10	0.999622
10A_994843	10A	994843	C	G	1.18264	7.25874	0.870692	bio13	10	0.999622
10A_1001779	10A	1001779	A	G	-5.65952	10.3691	0.585628	bio13	10	0.999622
10A_1024984	10A	1024984	C	T	-5.65952	10.3691	0.585628	bio13	10	0.999622
10A_1024990	10A	1024990	A	G	-1.61088	10.1246	0.873699	bio13	10	0.999622
10A_1025096	10A	1025096	G	T	1.58702	4.97118	0.749776	bio13	10	0.999622
10A_1025439	10A	1025439	C	T	1.58702	4.97118	0.749776	bio13	10	0.999622
10A_1033731	10A	1033731	G	A	-4.83356	7.36786	0.512332	bio13	10	0.999622
10A_1034934	10A	1034934	G	A	-6.76049	13.6097	0.619754	bio13	10	0.999622
10A_1360850	10A	1360850	C	T	0.105777	3.77709	0.977678	bio13	10	0.999622
10A_1374964	10A	1374964	A	G	-4.64533	7.67671	0.545581	bio13	10	0.999622
10A_1398576	10A	1398576	T	C	-4.77254	7.58942	0.529957	bio13	10	0.999622
10A_1398621	10A	1398621	T	G	-3.25553	7.31786	0.656748	bio13	10	0.999622
10A_1446998	10A	1446998	T	A	-4.46438	7.93854	0.574308	bio13	10	0.999622
10A_1497776	10A	1497776	A	T	-2.69585	7.72404	0.727331	bio13	10	0.999622
10A_1497803	10A	1497803	T	A	-3.85625	7.41931	0.603635	bio13	10	0.999622
10A_1583021	10A	1583021	A	G	-3.85625	7.41931	0.603635	bio13	10	0.999622
10A_1589161	10A	1589161	C	T	-3.71398	7.20237	0.606491	bio13	10	0.999622
10A_1680261	10A	1680261	C	T	-1.9183	6.4355	0.765859	bio13	10	0.999622
10A_1921934	10A	1921934	C	G	6.92925	11.4062	0.544003	bio13	10	0.999622
10A_1924452	10A	1924452	C	T	-4.40497	4.12448	0.286421	bio13	10	0.999622
10A_1924454	10A	1924454	T	C	2.9965	6.18357	0.628339	bio13	10	0.999622
10A_1988395	10A	1988395	G	A	-2.13174	4.52473	0.637908	bio13	10	0.999622
10A_1988440	10A	1988440	C	T	-4.89175	4.24983	0.250678	bio13	10	0.999622
10A_1988475	10A	1988475	G	A	-9.41877	12.9451	0.467458	bio13	10	0.999622
10A_2034823	10A	2034823	T	G	-7.24875	14.3721	0.614395	bio13	10	0.999622
10A_2035130	10A	2035130	G	C	-7.24875	14.3721	0.614395	bio13	10	0.999622
10A_2063605	10A	2063605	C	T	-2.22031	3.58546	0.536243	bio13	10	0.999622
10A_2066590	10A	2066590	A	G	-2.22031	3.58546	0.536243	bio13	10	0.999622
10A_2066858	10A	2066858	T	C	6.50501	4.4524	0.145113	bio13	10	0.999622
10A_2081827	10A	2081827	C	T	6.50501	4.4524	0.145113	bio13	10	0.999622
10A_2124112	10A	2124112	C	T	6.50501	4.4524	0.145113	bio13	10	0.999622
10A_2124142	10A	2124142	A	G	6.30777	9.90231	0.524636	bio13	10	0.999622
10A_2124334	10A	2124334	T	C	0.133321	3.51087	0.969735	bio13	10	0.999622
10A_2124806	10A	2124806	T	A	-1.72255	3.59598	0.632291	bio13	10	0.999622
10A_2124816	10A	2124816	A	G	3.09951	4.32381	0.474055	bio13	10	0.999622
10A_2133675	10A	2133675	C	T	3.09951	4.32381	0.474055	bio13	10	0.999622
10A_2133681	10A	2133681	A	G	9.66641	7.02376	0.169827	bio13	10	0.999622
10A_2133931	10A	2133931	G	A	5.40803	6.28015	0.389891	bio13	10	0.999622
10A_2133987	10A	2133987	T	C	7.15298	7.02346	0.309333	bio13	10	0.999622
10A_2143867	10A	2143867	C	T	2.27966	11.4012	0.841663	bio13	10	0.999622
10A_2163459	10A	2163459	G	T	4.66479	6.22511	0.454264	bio13	10	0.999622
10A_2163472	10A	2163472	T	G	-1.81895	9.96741	0.855328	bio13	10	0.999622
10A_2163518	10A	2163518	C	T	6.16204	6.43034	0.338736	bio13	10	0.999622
10A_2163519	10A	2163519	C	T	6.16204	6.43034	0.338736	bio13	10	0.999622
10A_2163718	10A	2163718	T	C	6.16204	6.43034	0.338736	bio13	10	0.999622
10A_2163722	10A	2163722	A	G	4.22074	6.05894	0.486612	bio13	10	0.999622
10A_2163745	10A	2163745	A	T	5.15253	5.95986	0.38802	bio13	10	0.999622
10A_2317767	10A	2317767	A	C	16.9127	10.9555	0.123754	bio13	10	0.999622
10A_2332394	10A	2332394	G	A	4.88987	8.15526	0.549251	bio13	10	0.999622
10A_2541883	10A	2541883	G	A	2.54615	8.5721	0.766662	bio13	10	0.999622
10A_2541892	10A	2541892	C	T	11.8825	7.34227	0.10669	bio13	10	0.999622
10A_2541906	10A	2541906	C	G	11.8825	7.34227	0.10669	bio13	10	0.999622
10A_2541910	10A	2541910	C	T	5.22621	5.91247	0.377479	bio13	10	0.999622
10A_2541933	10A	2541933	T	G	5.22621	5.91247	0.377479	bio13	10	0.999622
10A_2541938	10A	2541938	T	C	17.5511	11.7717	0.137079	bio13	10	0.999622
10A_2541952	10A	2541952	G	C	5.29991	5.83375	0.364387	bio13	10	0.999622
10A_2541967	10A	2541967	T	A	6.07044	6.16685	0.325771	bio13	10	0.999622
10A_2656211	10A	2656211	A	C	5.94687	5.94013	0.317611	bio13	10	0.999622
10A_2691368	10A	2691368	G	A	14.4115	9.93451	0.147978	bio13	10	0.999622
10A_2703860	10A	2703860	A	G	0.483465	6.1255	0.937146	bio13	10	0.999622
10A_2796357	10A	2796357	A	G	4.22601	14.0012	0.763001	bio13	10	0.999622
10A_2809710	10A	2809710	C	A	-2.3845	7.64636	0.755385	bio13	10	0.999622
10A_2809735	10A	2809735	G	A	-3.10745	7.85492	0.692692	bio13	10	0.999622
10A_2809744	10A	2809744	T	C	-4.47341	8.5905	0.602953	bio13	10	0.999622
10A_2868027	10A	2868027	A	T	0.680851	9.71289	0.944165	bio13	10	0.999622
10A_2930051	10A	2930051	T	C	5.71448	5.37248	0.288384	bio13	10	0.999622
10A_2959251	10A	2959251	T	C	-2.1956	4.30072	0.610082	bio13	10	0.999622
10A_2980653	10A	2980653	C	T	0.80715	11.3752	0.943482	bio13	10	0.999622
10A_2986821	10A	2986821	C	T	-15.3423	15.6233	0.326927	bio13	10	0.999622
10A_2986838	10A	2986838	A	G	-5.90494	4.96777	0.235568	bio13	10	0.999622
10A_2986912	10A	2986912	G	A	-3.19134	5.24103	0.543066	bio13	10	0.999622
10A_3033390	10A	3033390	T	A	-4.40651	3.03514	0.147648	bio13	10	0.999622
10A_3040001	10A	3040001	T	A	-10.2481	7.09284	0.149598	bio13	10	0.999622
10A_3124491	10A	3124491	A	G	-1.59991	10.3147	0.876845	bio13	10	0.999622
10A_3165961	10A	3165961	G	A	6.66502	5.93415	0.262313	bio13	10	0.999622
10A_3250310	10A	3250310	C	T	0.404233	4.61244	0.930225	bio13	10	0.999622
10A_3250723	10A	3250723	A	G	8.66342	8.1038	0.285949	bio13	10	0.999622
10A_3255077	10A	3255077	A	T	29.7804	12.7529	0.0202273	bio13	10	0.999622
10A_3282764	10A	3282764	G	A	30.2765	12.7674	0.018386	bio13	10	0.999622
10A_3363730	10A	3363730	G	T	3.67599	5.21287	0.481277	bio13	10	0.999622
10A_3363731	10A	3363731	T	G	2.42811	5.1544	0.637947	bio13	10	0.999622
10A_3363989	10A	3363989	G	C	3.67599	5.21287	0.481277	bio13	10	0.999622
10A_3364020	10A	3364020	G	A	6.86316	7.17018	0.339287	bio13	10	0.999622
10A_3412250	10A	3412250	A	C	1.10858	4.4145	0.8019	bio13	10	0.999622
10A_3412492	10A	3412492	G	A	2.09941	5.27594	0.690986	bio13	10	0.999622
10A_3417145	10A	3417145	T	C	-8.7048	7.89783	0.271315	bio13	10	0.999622
10A_3417403	10A	3417403	A	G	-6.106	8.46917	0.47152	bio13	10	0.999622
10A_3417408	10A	3417408	T	A	-1.27774	11.8857	0.914466	bio13	10	0.999622
10A_3417410	10A	3417410	G	A	-7.91446	8.51762	0.353579	bio13	10	0.999622
10A_3417456	10A	3417456	A	C	0.738818	8.29335	0.929076	bio13	10	0.999622
10A_3428732	10A	3428732	T	C	-2.98705	9.32863	0.749049	bio13	10	0.999622
10A_3463988	10A	3463988	C	T	-2.98705	9.32863	0.749049	bio13	10	0.999622
10A_3464007	10A	3464007	T	C	-2.98705	9.32863	0.749049	bio13	10	0.999622
10A_3464023	10A	3464023	C	T	-2.98705	9.32863	0.749049	bio13	10	0.999622
10A_3464030	10A	3464030	C	T	-2.98705	9.32863	0.749049	bio13	10	0.999622
10A_3479094	10A	3479094	C	A	6.77926	14.4941	0.640339	bio13	10	0.999622
10A_3479124	10A	3479124	T	A	-15.8975	11.9764	0.185436	bio13	10	0.999622
10A_3479481	10A	3479481	G	T	-5.19455	8.46416	0.539896	bio13	10	0.999622
10A_3489185	10A	3489185	A	G	0.451772	8.60046	0.958144	bio13	10	0.999622
10A_3495776	10A	3495776	C	T	0.451772	8.60046	0.958144	bio13	10	0.999622
10A_3495779	10A	3495779	G	A	0.451772	8.60046	0.958144	bio13	10	0.999622
10A_3495804	10A	3495804	C	T	-2.92957	8.81365	0.739839	bio13	10	0.999622
10A_3496068	10A	3496068	C	T	1.30347	4.51084	0.772819	bio13	10	0.999622
10A_3613023	10A	3613023	C	G	-3.39087	3.24187	0.296465	bio13	10	0.999622
10A_3635409	10A	3635409	T	A	12.1854	6.09659	0.0465873	bio13	10	0.999622
10A_3694723	10A	3694723	A	G	12.698	6.51989	0.0524478	bio13	10	0.999622
10A_3695030	10A	3695030	C	T	11.5941	6.0586	0.0566659	bio13	10	0.999622
10A_3695040	10A	3695040	C	T	-9.32797	13.0875	0.476589	bio13	10	0.999622
10A_3728825	10A	3728825	G	A	-9.32797	13.0875	0.476589	bio13	10	0.999622
10A_3742259	10A	3742259	A	G	-5.31824	3.5717	0.137595	bio13	10	0.999622
10A_3789924	10A	3789924	C	G	2.37763	10.8281	0.826356	bio13	10	0.999622
10A_3835263	10A	3835263	G	A	3.88674	10.3049	0.706325	bio13	10	0.999622
10A_3835307	10A	3835307	C	T	13.2638	13.3527	0.321387	bio13	10	0.999622
10A_3844797	10A	3844797	G	T	-3.39301	13.2895	0.798663	bio13	10	0.999622
10A_3845096	10A	3845096	G	C	-3.39301	13.2895	0.798663	bio13	10	0.999622
10A_3904484	10A	3904484	A	G	-3.39301	13.2895	0.798663	bio13	10	0.999622
10A_3904763	10A	3904763	G	C	-3.39301	13.2895	0.798663	bio13	10	0.999622
10A_3943764	10A	3943764	G	A	11.156	7.84856	0.156293	bio13	10	0.999622
10A_3944087	10A	3944087	A	G	13.6772	8.21358	0.0969735	bio13	10	0.999622
10A_3944157	10A	3944157	A	C	10.8903	7.74857	0.160975	bio13	10	0.999622
10A_3970894	10A	3970894	C	T	11.8588	7.76705	0.127919	bio13	10	0.999622
10A_3970896	10A	3970896	G	A	9.11109	7.68905	0.237027	bio13	10	0.999622
10A_3970941	10A	3970941	T	C	10.236	8.01862	0.202809	bio13	10	0.999622
10A_3970953	10A	3970953	C	T	-13.1469	6.98008	0.0606514	bio13	10	0.999622
10A_3971124	10A	3971124	G	A	-5.23294	5.58848	0.34987	bio13	10	0.999622
10A_3971144	10A	3971144	C	T	-7.14316	4.39112	0.1049	bio13	10	0.999622
10A_3971146	10A	3971146	G	A	-25.8719	14.3672	0.0727974	bio13	10	0.999622
10A_3975432	10A	3975432	C	T	-25.8719	14.3672	0.0727974	bio13	10	0.999622
10A_3975434	10A	3975434	C	T	5.68701	9.93811	0.567608	bio13	10	0.999622
10A_4005828	10A	4005828	T	C	-29.5289	15.4751	0.0573754	bio13	10	0.999622
10A_4005832	10A	4005832	G	A	5.9333	10.1212	0.558187	bio13	10	0.999622
10A_4015412	10A	4015412	T	C	3.35004	9.089	0.712713	bio13	10	0.999622
10A_4015419	10A	4015419	C	A	-12.8884	11.6281	0.268629	bio13	10	0.999622
10A_4046173	10A	4046173	T	A	10.7174	9.83966	0.276983	bio13	10	0.999622
10A_4046504	10A	4046504	C	G	7.75685	8.42992	0.358269	bio13	10	0.999622
10A_4050088	10A	4050088	T	A	0.190366	7.71513	0.980332	bio13	10	0.999622
10A_4129393	10A	4129393	C	T	5.49287	8.20719	0.503862	bio13	10	0.999622
10A_4227970	10A	4227970	C	A	-31.2398	23.2991	0.181048	bio13	10	0.999622
10A_4228014	10A	4228014	A	T	-3.38672	7.45935	0.650158	bio13	10	0.999622
10A_4359818	10A	4359818	G	T	-3.38672	7.45935	0.650158	bio13	10	0.999622
10A_4370623	10A	4370623	C	T	-9.32441	13.3063	0.48403	bio13	10	0.999622
10A_4520136	10A	4520136	A	G	-5.61678	7.83521	0.474045	bio13	10	0.999622
10A_4824770	10A	4824770	T	C	-16.6359	13.7391	0.226959	bio13	10	0.999622
10A_4993130	10A	4993130	G	A	-5.66192	5.2484	0.281593	bio13	10	0.999622
10A_4993422	10A	4993422	G	A	-4.15906	12.3584	0.736713	bio13	10	0.999622
10A_4993423	10A	4993423	G	A	14.254	5.7344	0.0135028	bio13	10	0.999622
10A_4993463	10A	4993463	G	A	7.72839	5.25387	0.142397	bio13	10	0.999622
10A_5141642	10A	5141642	G	A	5.98578	5.51227	0.278441	bio13	10	0.999622
10A_5166573	10A	5166573	A	C	8.16269	5.8115	0.161236	bio13	10	0.999622
10A_5191105	10A	5191105	G	A	-0.598692	4.40189	0.891911	bio13	10	0.999622
10A_5191403	10A	5191403	C	A	-6.42318	11.5859	0.579742	bio13	10	0.999622
10A_5343802	10A	5343802	G	T	-0.50282	7.8274	0.948825	bio13	10	0.999622
10A_5430617	10A	5430617	C	T	9.96208	7.72819	0.198424	bio13	10	0.999622
10A_5475088	10A	5475088	G	A	10.9887	7.74235	0.156904	bio13	10	0.999622
10A_5544765	10A	5544765	G	C	10.9887	7.74235	0.156904	bio13	10	0.999622
10A_5621865	10A	5621865	G	A	10.3323	7.99521	0.197297	bio13	10	0.999622
10A_5622027	10A	5622027	C	T	10.3323	7.99521	0.197297	bio13	10	0.999622
10A_5622079	10A	5622079	G	A	10.3323	7.99521	0.197297	bio13	10	0.999622
10A_5797845	10A	5797845	C	T	-28.3199	13.9578	0.0433911	bio13	10	0.999622
10A_5904310	10A	5904310	G	A	15.4879	11.0631	0.162613	bio13	10	0.999622
10A_5904312	10A	5904312	G	A	13.9297	9.96157	0.163098	bio13	10	0.999622
10A_5904319	10A	5904319	T	G	14.041	10.7717	0.193453	bio13	10	0.999622
10A_6241556	10A	6241556	G	A	15.0626	9.91774	0.129932	bio13	10	0.999622
10A_6427223	10A	6427223	T	C	15.0626	9.91774	0.129932	bio13	10	0.999622
10A_6599915	10A	6599915	G	A	15.0626	9.91774	0.129932	bio13	10	0.999622
10A_6683542	10A	6683542	T	G	15.0626	9.91774	0.129932	bio13	10	0.999622
10A_6732111	10A	6732111	C	T	15.0626	9.91774	0.129932	bio13	10	0.999622
10A_6776255	10A	6776255	C	T	14.7908	9.729	0.12955	bio13	10	0.999622
10A_6856502	10A	6856502	C	T	-2.33331	14.1336	0.86899	bio13	10	0.999622
10A_6873510	10A	6873510	G	A	9.32448	10.6156	0.380481	bio13	10	0.999622
10A_6915366	10A	6915366	G	C	-15.9558	7.67056	0.0384063	bio13	10	0.999622
10A_6945717	10A	6945717	G	T	8.95902	5.53784	0.106816	bio13	10	0.999622
10A_6946014	10A	6946014	T	C	12.8346	6.65773	0.0548764	bio13	10	0.999622
10A_6954873	10A	6954873	T	A	-4.88231	5.20685	0.349208	bio13	10	0.999622
10A_6969853	10A	6969853	A	G	1.12539	4.02625	0.780053	bio13	10	0.999622
10A_6970152	10A	6970152	G	A	-10.3014	14.2621	0.470707	bio13	10	0.999622
10A_6974245	10A	6974245	C	G	-4.74629	4.71378	0.314838	bio13	10	0.999622
10A_6974619	10A	6974619	A	G	-5.62451	4.35499	0.197573	bio13	10	0.999622
10A_6974623	10A	6974623	G	A	-16.4075	6.45142	0.0115116	bio13	10	0.999622
10A_6989038	10A	6989038	G	A	-17.5878	6.23872	0.00515282	bio13	10	0.999622
10A_7013803	10A	7013803	G	A	-7.4584	6.97058	0.285533	bio13	10	0.999622
10A_7013994	10A	7013994	G	A	-1.78879	3.41071	0.600365	bio13	10	0.999622
10A_7054462	10A	7054462	C	T	-0.893873	11.1349	0.936073	bio13	10	0.999622
10A_7078158	10A	7078158	G	A	-3.83852	4.83869	0.428265	bio13	10	0.999622
10A_7078437	10A	7078437	T	C	-3.25856	4.88593	0.505357	bio13	10	0.999622
10A_7093849	10A	7093849	C	G	-5.22488	4.64423	0.261525	bio13	10	0.999622
10A_7121373	10A	7121373	T	C	-5.22488	4.64423	0.261525	bio13	10	0.999622
10A_7121425	10A	7121425	G	T	-4.24613	4.74204	0.371316	bio13	10	0.999622
10A_7125602	10A	7125602	G	A	-3.41502	3.36324	0.310778	bio13	10	0.999622
10A_7134978	10A	7134978	G	T	-0.407984	3.60752	0.910037	bio13	10	0.999622
10A_7135192	10A	7135192	G	A	-30.035	14.7525	0.0426827	bio13	10	0.999622
10A_7156445	10A	7156445	T	A	-2.01634	5.20868	0.698963	bio13	10	0.999622
10A_7336124	10A	7336124	T	G	-5.23545	7.90845	0.508501	bio13	10	0.999622
10A_7336345	10A	7336345	C	T	-2.31966	3.82524	0.544726	bio13	10	0.999622
10A_7343599	10A	7343599	G	C	-2.31966	3.82524	0.544726	bio13	10	0.999622
10A_7343951	10A	7343951	G	A	-3.39848	5.48645	0.536127	bio13	10	0.999622
10A_7415583	10A	7415583	T	C	-7.9647	6.52862	0.223486	bio13	10	0.999622
10A_7415608	10A	7415608	G	T	-2.2802	5.88604	0.698756	bio13	10	0.999622
10A_7415630	10A	7415630	C	T	-3.22238	5.97154	0.589878	bio13	10	0.999622
10A_7415652	10A	7415652	A	G	-1.25602	6.23243	0.840428	bio13	10	0.999622
10A_7424426	10A	7424426	C	G	5.17807	9.44521	0.583969	bio13	10	0.999622
10A_7451664	10A	7451664	A	G	2.58494	3.53713	0.465501	bio13	10	0.999622
10A_7499710	10A	7499710	C	G	3.27391	3.80609	0.390414	bio13	10	0.999622
10A_7511278	10A	7511278	G	A	3.27391	3.80609	0.390414	bio13	10	0.999622
10A_7566354	10A	7566354	C	T	2.92045	3.71554	0.432515	bio13	10	0.999622
10A_7670010	10A	7670010	C	T	1.33902	3.73877	0.7205	bio13	10	0.999622
10A_7670011	10A	7670011	A	T	-5.85955	6.2161	0.346663	bio13	10	0.999622
10A_7677541	10A	7677541	G	A	1.42774	3.73862	0.702828	bio13	10	0.999622
10A_7699179	10A	7699179	A	G	-1.86905	5.78067	0.746684	bio13	10	0.999622
10A_7699472	10A	7699472	C	T	3.89762	3.5944	0.279122	bio13	10	0.999622
10A_7702890	10A	7702890	C	T	-18.732	14.5132	0.197859	bio13	10	0.999622
10A_7702928	10A	7702928	C	T	3.32464	3.51159	0.344562	bio13	10	0.999622
10A_7703185	10A	7703185	C	G	10.0446	11.2555	0.372921	bio13	10	0.999622
10A_7757767	10A	7757767	A	G	-6.98059	7.35599	0.343441	bio13	10	0.999622
10A_7757768	10A	7757768	T	C	4.52834	3.93079	0.250279	bio13	10	0.999622
10A_7826057	10A	7826057	G	A	4.56417	3.64399	0.211407	bio13	10	0.999622
10A_7870859	10A	7870859	C	T	-2.68288	6.16333	0.663676	bio13	10	0.999622
10A_7870888	10A	7870888	G	A	-1.34081	3.70609	0.71778	bio13	10	0.999622
10A_7870929	10A	7870929	C	T	-13.7204	12.9326	0.289624	bio13	10	0.999622
10A_7886493	10A	7886493	C	G	-4.62973	4.58826	0.313811	bio13	10	0.999622
10A_7919222	10A	7919222	T	C	-2.90984	4.67735	0.534364	bio13	10	0.999622
10A_8088426	10A	8088426	T	C	-3.68375	4.57737	0.421621	bio13	10	0.999622
10A_8088444	10A	8088444	C	A	-3.68375	4.57737	0.421621	bio13	10	0.999622
10A_8088453	10A	8088453	T	C	-3.68375	4.57737	0.421621	bio13	10	0.999622
10A_8088484	10A	8088484	T	C	-3.52414	4.67677	0.451747	bio13	10	0.999622
10A_8108440	10A	8108440	C	T	-2.26798	4.43084	0.609143	bio13	10	0.999622
10A_8109033	10A	8109033	T	C	-1.58575	4.36747	0.716812	bio13	10	0.999622
10A_8113419	10A	8113419	T	C	-0.215411	4.22989	0.95942	bio13	10	0.999622
10A_8131173	10A	8131173	G	A	-1.81058	4.23869	0.669589	bio13	10	0.999622
10A_8136279	10A	8136279	C	A	-1.81058	4.23869	0.669589	bio13	10	0.999622
10A_8136501	10A	8136501	G	C	-1.59646	4.26774	0.708627	bio13	10	0.999622
10A_8144290	10A	8144290	G	C	0.23735	4.23034	0.955296	bio13	10	0.999622
10A_8205491	10A	8205491	G	A	-2.67042	4.19963	0.525372	bio13	10	0.999622
10A_8252409	10A	8252409	A	C	-2.67042	4.19963	0.525372	bio13	10	0.999622
10A_8252636	10A	8252636	C	T	0.263205	4.25967	0.950774	bio13	10	0.999622
10A_8268942	10A	8268942	G	A	15.4899	10.5603	0.143534	bio13	10	0.999622
10A_8268953	10A	8268953	G	A	-0.838202	4.25447	0.843955	bio13	10	0.999622
10A_8269232	10A	8269232	G	A	4.3339	8.24556	0.599572	bio13	10	0.999622
10A_8412896	10A	8412896	C	T	-2.86379	3.696	0.43908	bio13	10	0.999622
10A_8413238	10A	8413238	C	A	-1.84652	3.87689	0.634234	bio13	10	0.999622
10A_8413239	10A	8413239	T	C	15.2281	13.4395	0.258132	bio13	10	0.999622
10A_8452930	10A	8452930	C	A	15.2281	13.4395	0.258132	bio13	10	0.999622
10A_8453285	10A	8453285	G	T	1.52332	5.0859	0.764762	bio13	10	0.999622
10A_8453337	10A	8453337	C	T	2.46416	5.30462	0.642622	bio13	10	0.999622
10A_8510962	10A	8510962	C	G	3.54966	4.53557	0.434497	bio13	10	0.999622
10A_8511077	10A	8511077	T	G	3.18099	4.59446	0.48928	bio13	10	0.999622
10A_8511081	10A	8511081	G	A	15.2263	11.0917	0.170906	bio13	10	0.999622
10A_8511413	10A	8511413	G	A	7.5459	11.1851	0.500452	bio13	10	0.999622
10A_8530152	10A	8530152	G	A	7.7971	9.99413	0.43594	bio13	10	0.999622
10A_8569186	10A	8569186	C	T	-29.648	12.2105	0.0157983	bio13	10	0.999622
10A_8632657	10A	8632657	T	C	-2.76832	8.55954	0.746615	bio13	10	0.999622
10A_8632683	10A	8632683	T	C	3.25597	11.0518	0.768507	bio13	10	0.999622
10A_8633006	10A	8633006	C	T	8.28122	14.588	0.570703	bio13	10	0.999622
10A_8636734	10A	8636734	G	A	-1.17031	4.83019	0.808729	bio13	10	0.999622
10A_8636764	10A	8636764	T	C	11.3257	13.3917	0.398416	bio13	10	0.999622
10A_8636959	10A	8636959	C	A	-3.413	10.5166	0.745772	bio13	10	0.999622
10A_8658968	10A	8658968	T	C	-3.72116	4.90747	0.44892	bio13	10	0.999622
10A_8803117	10A	8803117	C	T	11.5443	11.4574	0.314511	bio13	10	0.999622
10A_8828335	10A	8828335	A	G	5.57766	5.08424	0.273546	bio13	10	0.999622
10A_8872641	10A	8872641	C	T	1.00658	5.04608	0.842031	bio13	10	0.999622
10A_8889986	10A	8889986	T	C	-2.23212	5.79908	0.700592	bio13	10	0.999622
10A_8890014	10A	8890014	A	G	-2.23212	5.79908	0.700592	bio13	10	0.999622
10A_8903482	10A	8903482	C	T	-2.23212	5.79908	0.700592	bio13	10	0.999622
10A_8903491	10A	8903491	T	C	-1.37188	5.91839	0.81686	bio13	10	0.999622
10A_8903497	10A	8903497	G	A	0.678971	5.65777	0.904562	bio13	10	0.999622
10A_8943153	10A	8943153	G	A	-1.42298	12.1297	0.906694	bio13	10	0.999622
10A_8954921	10A	8954921	A	T	-12.1929	7.30009	0.0959687	bio13	10	0.999622
10A_8961310	10A	8961310	C	T	-3.87584	11.5084	0.736528	bio13	10	0.999622
10A_8961600	10A	8961600	T	A	-1.19216	8.88079	0.893308	bio13	10	0.999622
10A_8984613	10A	8984613	T	C	-2.80085	9.05825	0.757392	bio13	10	0.999622
10A_8984843	10A	8984843	A	G	-3.05012	8.9406	0.733239	bio13	10	0.999622
10A_8984883	10A	8984883	G	A	-5.03723	7.61726	0.50896	bio13	10	0.999622
10A_8985220	10A	8985220	G	A	-3.05012	8.9406	0.733239	bio13	10	0.999622
10A_8985275	10A	8985275	G	A	-0.093038	4.13402	0.982061	bio13	10	0.999622
10A_9131769	10A	9131769	C	G	-0.228763	4.20378	0.95664	bio13	10	0.999622
10A_9301647	10A	9301647	G	A	9.33248	8.81201	0.290468	bio13	10	0.999622
10A_9485582	10A	9485582	T	C	-8.00426	7.17478	0.265529	bio13	10	0.999622
10A_9556011	10A	9556011	T	G	-4.11107	13.9322	0.768151	bio13	10	0.999622
10A_9556037	10A	9556037	A	G	-4.11107	13.9322	0.768151	bio13	10	0.999622
10A_9568426	10A	9568426	A	G	1.09457	17.314	0.949637	bio13	10	0.999622
10A_9568459	10A	9568459	G	A	10.2567	8.96461	0.253528	bio13	10	0.999622
10A_9568526	10A	9568526	G	A	5.25604	7.93432	0.508222	bio13	10	0.999622
10A_9568802	10A	9568802	C	T	8.20906	8.50032	0.334995	bio13	10	0.999622
10A_9593786	10A	9593786	G	A	-8.32498	15.2214	0.584857	bio13	10	0.999622
10A_9596727	10A	9596727	T	G	14.0981	12.7006	0.267921	bio13	10	0.999622
10A_9803457	10A	9803457	G	A	-5.127	11.7571	0.663111	bio13	10	0.999622
10A_9834160	10A	9834160	G	A	9.83273	12.1823	0.420263	bio13	10	0.999622
10A_9834181	10A	9834181	G	T	9.83273	12.1823	0.420263	bio13	10	0.999622
10A_10153175	10A	10153175	C	T	6.24308	8.81615	0.479436	bio13	10	0.999622
10A_10263988	10A	10263988	C	T	-1.561	7.425	0.833634	bio13	10	0.999622
10A_10264430	10A	10264430	G	A	-10.6466	12.0387	0.377246	bio13	10	0.999622
10A_10264446	10A	10264446	C	A	-4.83453	13.3432	0.717381	bio13	10	0.999622
10A_10265949	10A	10265949	C	A	9.48162	8.31881	0.255335	bio13	10	0.999622
10A_10266194	10A	10266194	G	A	13.2115	11.4137	0.248032	bio13	10	0.999622
10A_10282643	10A	10282643	C	T	2.6736	16.8167	0.873794	bio13	10	0.999622
10A_10282737	10A	10282737	A	T	2.6736	16.8167	0.873794	bio13	10	0.999622
10A_10282774	10A	10282774	G	C	0.228323	7.61452	0.9761	bio13	10	0.999622
10A_10283021	10A	10283021	A	G	5.72841	8.80908	0.516032	bio13	10	0.999622
10A_10284351	10A	10284351	C	T	-16.951	13.5816	0.213022	bio13	10	0.999622
10A_10285055	10A	10285055	C	T	-2.26428	7.67	0.768046	bio13	10	0.999622
10A_10289685	10A	10289685	A	G	-2.26428	7.67	0.768046	bio13	10	0.999622
10A_10295287	10A	10295287	A	G	3.45988	7.70288	0.653652	bio13	10	0.999622
10A_10295375	10A	10295375	C	T	-2.50053	7.72247	0.746327	bio13	10	0.999622
10A_10300966	10A	10300966	A	G	-4.48264	6.48987	0.490308	bio13	10	0.999622
10A_10302666	10A	10302666	T	C	5.74081	11.7973	0.626901	bio13	10	0.999622
10A_10302682	10A	10302682	C	G	-6.96413	8.55751	0.416437	bio13	10	0.999622
10A_10303016	10A	10303016	C	T	-10.8302	8.21404	0.188397	bio13	10	0.999622
10A_10303813	10A	10303813	C	T	-3.44459	6.42009	0.592009	bio13	10	0.999622
10A_10331737	10A	10331737	A	G	2.92184	13.1539	0.824374	bio13	10	0.999622
10A_10331760	10A	10331760	G	A	-0.440052	6.37393	0.945007	bio13	10	0.999622
10A_10332048	10A	10332048	A	G	-2.98082	6.51487	0.64763	bio13	10	0.999622
10A_10351117	10A	10351117	C	T	-2.03719	7.99854	0.799142	bio13	10	0.999622
10A_10351412	10A	10351412	G	A	-2.03719	7.99854	0.799142	bio13	10	0.999622
10A_10351518	10A	10351518	G	C	-2.03719	7.99854	0.799142	bio13	10	0.999622
10A_10351779	10A	10351779	A	G	-2.04161	6.41403	0.750488	bio13	10	0.999622
10A_10362022	10A	10362022	C	T	3.63766	3.8376	0.343983	bio13	10	0.999622
10A_10362106	10A	10362106	C	T	3.63721	6.09332	0.551036	bio13	10	0.999622
10A_10385033	10A	10385033	G	C	2.25269	11.3467	0.84277	bio13	10	0.999622
10A_10385075	10A	10385075	T	C	-4.10464	7.56327	0.587755	bio13	10	0.999622
10A_10467244	10A	10467244	A	G	-2.10286	6.37665	0.741812	bio13	10	0.999622
10A_10467245	10A	10467245	A	G	-2.10286	6.37665	0.741812	bio13	10	0.999622
10A_10467253	10A	10467253	G	A	-2.75267	6.47907	0.671262	bio13	10	0.999622
10A_10467254	10A	10467254	C	T	-1.2043	6.3228	0.849077	bio13	10	0.999622
10A_10467263	10A	10467263	C	T	-3.17948	5.54398	0.566758	bio13	10	0.999622
10A_10467274	10A	10467274	T	C	0.593221	6.58237	0.928253	bio13	10	0.999622
10A_10467642	10A	10467642	C	T	-2.51753	8.69683	0.772427	bio13	10	0.999622
10A_10467663	10A	10467663	C	T	-7.5772	6.01232	0.2086	bio13	10	0.999622
10A_10481108	10A	10481108	G	A	-1.26217	12.9084	0.922177	bio13	10	0.999622
10A_10627866	10A	10627866	C	T	3.77763	9.65795	0.695984	bio13	10	0.999622
10A_10627899	10A	10627899	T	C	-1.35744	6.75612	0.840904	bio13	10	0.999622
10A_10628105	10A	10628105	G	A	-6.13538	6.36781	0.336114	bio13	10	0.999622
10A_10628477	10A	10628477	G	A	-2.46405	7.41406	0.739871	bio13	10	0.999622
10A_10658256	10A	10658256	T	C	-5.39336	6.1542	0.381567	bio13	10	0.999622
10A_10672466	10A	10672466	C	T	-5.39336	6.1542	0.381567	bio13	10	0.999622
10A_10672468	10A	10672468	A	G	-8.76241	9.10715	0.336792	bio13	10	0.999622
10A_10672479	10A	10672479	G	C	11.5424	4.54388	0.0116097	bio13	10	0.999622
10A_10676458	10A	10676458	C	T	-6.97811	4.41527	0.115113	bio13	10	0.999622
10A_10694421	10A	10694421	C	T	-6.70227	4.42776	0.131212	bio13	10	0.999622
10A_10734140	10A	10734140	C	T	-6.70227	4.42776	0.131212	bio13	10	0.999622
10A_10890573	10A	10890573	C	T	-8.50742	5.94449	0.153485	bio13	10	0.999622
10A_10890788	10A	10890788	T	C	-6.90002	4.44923	0.122051	bio13	10	0.999622
10A_10890794	10A	10890794	A	G	-7.02852	4.46596	0.116644	bio13	10	0.999622
10A_10902675	10A	10902675	T	A	-6.14569	5.79666	0.289946	bio13	10	0.999622
10A_10903250	10A	10903250	C	A	-1.66659	4.55722	0.714857	bio13	10	0.999622
10A_11181808	10A	11181808	A	G	0.348865	4.19407	0.933766	bio13	10	0.999622
10A_11344923	10A	11344923	C	T	-6.59511	6.26518	0.293388	bio13	10	0.999622
10A_11345212	10A	11345212	G	A	9.42294	10.5308	0.371651	bio13	10	0.999622
10A_11767337	10A	11767337	A	C	-0.396592	4.91795	0.935783	bio13	10	0.999622
10A_11767379	10A	11767379	G	A	6.63908	12.0086	0.580794	bio13	10	0.999622
10A_12057470	10A	12057470	C	A	7.28461	7.20541	0.312878	bio13	10	0.999622
10A_12075374	10A	12075374	G	T	20.2751	9.0601	0.026004	bio13	10	0.999622
10A_12109845	10A	12109845	A	G	21.0845	8.72172	0.0162563	bio13	10	0.999622
10A_12109894	10A	12109894	C	T	21.0845	8.72172	0.0162563	bio13	10	0.999622
10A_12170132	10A	12170132	C	T	20.6397	8.79743	0.0196557	bio13	10	0.999622
10A_12362120	10A	12362120	C	T	13.2891	15.5097	0.392262	bio13	10	0.999622
10A_12421548	10A	12421548	G	A	-1.82692	12.6398	0.885178	bio13	10	0.999622
10A_12642238	10A	12642238	G	A	-1.82692	12.6398	0.885178	bio13	10	0.999622
10A_12796150	10A	12796150	G	A	-23.35	12.5532	0.0639047	bio13	10	0.999622
10A_13123514	10A	13123514	G	A	-1.02915	9.57988	0.914525	bio13	10	0.999622
10A_13215893	10A	13215893	T	A	-5.35218	4.51575	0.236916	bio13	10	0.999622
10A_13293655	10A	13293655	G	C	3.61766	5.33958	0.498628	bio13	10	0.999622
10A_13293682	10A	13293682	A	G	-2.00072	4.15801	0.630763	bio13	10	0.999622
10A_13316739	10A	13316739	T	C	-5.99837	4.64981	0.198088	bio13	10	0.999622
10A_13469074	10A	13469074	C	T	3.58438	7.49143	0.632687	bio13	10	0.999622
10A_13486269	10A	13486269	C	T	3.35604	3.86644	0.38613	bio13	10	0.999622
10A_14053470	10A	14053470	C	T	17.2995	13.8168	0.211573	bio13	10	0.999622
10A_14234071	10A	14234071	C	T	-7.07475	10.0813	0.483393	bio13	10	0.999622
10A_14234092	10A	14234092	G	A	3.40963	16.7248	0.838603	bio13	10	0.999622
10A_14447492	10A	14447492	A	G	21.0676	12.5884	0.0953116	bio13	10	0.999622
10A_14706864	10A	14706864	A	T	4.62105	6.82641	0.498995	bio13	10	0.999622
10A_14706877	10A	14706877	G	A	1.92998	3.73629	0.60587	bio13	10	0.999622
10A_14735978	10A	14735978	T	C	-4.53426	6.20817	0.465765	bio13	10	0.999622
10A_14915621	10A	14915621	T	C	24.7479	12.1148	0.0419942	bio13	10	0.999622
10A_14934501	10A	14934501	C	A	-14.4119	13.2391	0.277254	bio13	10	0.999622
10A_15072632	10A	15072632	G	A	13.801	8.6435	0.111442	bio13	10	0.999622
10A_15144689	10A	15144689	G	A	2.60046	4.04813	0.52114	bio13	10	0.999622
10A_15145021	10A	15145021	G	A	2.75163	4.29179	0.521949	bio13	10	0.999622
10A_15328323	10A	15328323	C	A	2.56785	9.86599	0.794841	bio13	10	0.999622
10A_15999626	10A	15999626	G	A	17.1129	31.3212	0.585241	bio13	10	0.999622
10A_16464177	10A	16464177	A	G	-8.21587	6.66259	0.218541	bio13	10	0.999622
10A_16685587	10A	16685587	T	C	13.6688	6.86591	0.0474552	bio13	10	0.999622
10A_16724110	10A	16724110	T	C	-0.991193	5.71629	0.862462	bio13	10	0.999622
10A_16724152	10A	16724152	A	C	-0.991193	5.71629	0.862462	bio13	10	0.999622
10A_16778815	10A	16778815	G	T	4.68817	9.81698	0.633331	bio13	10	0.999622
10A_16778845	10A	16778845	G	A	5.57189	3.94972	0.159422	bio13	10	0.999622
10A_16779101	10A	16779101	T	C	5.44041	3.98699	0.173474	bio13	10	0.999622
10A_16779132	10A	16779132	C	T	5.44041	3.98699	0.173474	bio13	10	0.999622
10A_16779141	10A	16779141	C	T	0.0401317	4.5865	0.993025	bio13	10	0.999622
10A_16779145	10A	16779145	T	C	-1.97897	11.9931	0.869054	bio13	10	0.999622
10A_16938869	10A	16938869	C	T	0.243341	3.82983	0.949382	bio13	10	0.999622
10A_17234379	10A	17234379	G	A	0.430228	3.8417	0.910911	bio13	10	0.999622
10A_17234592	10A	17234592	C	T	-12.8021	11.2649	0.256717	bio13	10	0.999622
10A_17234618	10A	17234618	G	A	-12.8021	11.2649	0.256717	bio13	10	0.999622
10A_17301985	10A	17301985	C	T	1.76182	3.64486	0.629204	bio13	10	0.999622
10A_17387060	10A	17387060	A	C	0.534931	4.86771	0.912571	bio13	10	0.999622
10A_17395068	10A	17395068	T	A	-14.1763	21.3694	0.507616	bio13	10	0.999622
10A_17395713	10A	17395713	T	C	0.93776	4.7583	0.843906	bio13	10	0.999622
10A_17508244	10A	17508244	A	G	-0.120691	4.8812	0.980291	bio13	10	0.999622
10A_17508255	10A	17508255	G	A	0.534931	4.86771	0.912571	bio13	10	0.999622
10A_17508269	10A	17508269	A	C	3.33089	8.17288	0.683907	bio13	10	0.999622
10A_17508611	10A	17508611	G	A	3.57342	3.35825	0.288197	bio13	10	0.999622
10A_17683602	10A	17683602	G	A	3.85808	6.7632	0.568821	bio13	10	0.999622
10A_17824571	10A	17824571	G	A	-2.97349	19.8997	0.881324	bio13	10	0.999622
10A_17898488	10A	17898488	T	C	4.67428	9.6038	0.626837	bio13	10	0.999622
10A_17898550	10A	17898550	G	A	-12.6637	9.11835	0.165973	bio13	10	0.999622
10A_17898808	10A	17898808	A	G	9.26273	3.88793	0.0178545	bio13	10	0.999622
10A_17901757	10A	17901757	T	C	9.26273	3.88793	0.0178545	bio13	10	0.999622
10A_17907134	10A	17907134	C	A	9.65851	3.96739	0.0155274	bio13	10	0.999622
10A_17907382	10A	17907382	G	A	-1.72518	22.2338	0.938207	bio13	10	0.999622
10A_17920297	10A	17920297	C	T	9.65851	3.96739	0.0155274	bio13	10	0.999622
10A_18060790	10A	18060790	G	A	9.65851	3.96739	0.0155274	bio13	10	0.999622
10A_18097805	10A	18097805	C	A	9.65851	3.96739	0.0155274	bio13	10	0.999622
10A_18098056	10A	18098056	C	T	-28.495	11.4829	0.0136592	bio13	10	0.999622
10A_18138753	10A	18138753	C	T	10.0389	4.61974	0.0306002	bio13	10	0.999622
10A_18138773	10A	18138773	C	G	14.7485	10.3631	0.15578	bio13	10	0.999622
10A_18149229	10A	18149229	C	T	7.82995	4.79692	0.103723	bio13	10	0.999622
10A_18149246	10A	18149246	C	T	7.42035	4.81087	0.124083	bio13	10	0.999622
10A_18149278	10A	18149278	A	G	38.6452	18.5872	0.0384992	bio13	10	0.999622
10A_18201944	10A	18201944	C	A	30.9161	12.5815	0.0145957	bio13	10	0.999622
10A_18240835	10A	18240835	T	A	-4.08165	3.65276	0.264757	bio13	10	0.999622
10A_18240855	10A	18240855	T	G	-24.5179	12.4028	0.0490271	bio13	10	0.999622
10A_18322959	10A	18322959	C	A	0.64579	8.25196	0.937677	bio13	10	0.999622
10A_18398501	10A	18398501	G	A	-0.743007	14.8304	0.960078	bio13	10	0.999622
10A_18475903	10A	18475903	G	A	1.89351	4.62602	0.682614	bio13	10	0.999622
10A_18865669	10A	18865669	C	T	4.10213	6.76114	0.544518	bio13	10	0.999622
10A_18893989	10A	18893989	G	A	-5.91491	8.35157	0.479375	bio13	10	0.999622
10A_18933387	10A	18933387	T	C	-5.91491	8.35157	0.479375	bio13	10	0.999622
10A_19088298	10A	19088298	G	A	-5.91491	8.35157	0.479375	bio13	10	0.999622
10A_19088744	10A	19088744	C	A	8.39044	7.71827	0.277916	bio13	10	0.999622
10A_19347511	10A	19347511	A	C	10.1463	7.71808	0.189698	bio13	10	0.999622
10A_19771626	10A	19771626	G	A	-2.24127	7.24189	0.757178	bio13	10	0.999622
10A_19805968	10A	19805968	C	A	-4.0754	18.4411	0.825254	bio13	10	0.999622
10A_20091566	10A	20091566	T	C	2.95226	4.0743	0.469288	bio13	10	0.999622
10A_20098738	10A	20098738	G	A	2.23225	4.00711	0.577915	bio13	10	0.999622
10A_20098741	10A	20098741	G	T	-3.70886	6.92248	0.592535	bio13	10	0.999622
10A_20098771	10A	20098771	C	T	-4.59586	5.22351	0.379686	bio13	10	0.999622
10A_20098773	10A	20098773	C	T	-5.09124	5.72315	0.374438	bio13	10	0.999622
10A_20098796	10A	20098796	G	A	-5.09124	5.72315	0.374438	bio13	10	0.999622
10A_20099022	10A	20099022	T	C	-5.09124	5.72315	0.374438	bio13	10	0.999622
10A_20125055	10A	20125055	T	C	-1.50469	5.71771	0.792615	bio13	10	0.999622
10A_20173450	10A	20173450	A	G	1.49655	4.40651	0.734392	bio13	10	0.999622
10A_20309709	10A	20309709	C	T	31.5901	22.4193	0.159907	bio13	10	0.999622
10A_20312247	10A	20312247	G	A	2.99919	7.24076	0.679033	bio13	10	0.999622
10A_20312262	10A	20312262	C	A	3.06894	7.24063	0.671996	bio13	10	0.999622
10A_20312495	10A	20312495	C	T	-0.562178	7.29629	0.938638	bio13	10	0.999622
10A_20312586	10A	20312586	T	C	-1.43692	9.65228	0.881763	bio13	10	0.999622
10A_20318108	10A	20318108	A	G	-8.4024	3.66615	0.0226414	bio13	10	0.999622
10A_20318342	10A	20318342	C	T	0.693064	7.27155	0.924134	bio13	10	0.999622
10A_20353553	10A	20353553	T	C	0.693064	7.27155	0.924134	bio13	10	0.999622
10A_20362657	10A	20362657	T	C	8.58229	4.3971	0.0519407	bio13	10	0.999622
10A_20387976	10A	20387976	T	C	-5.60353	4.07273	0.169944	bio13	10	0.999622
10A_20424052	10A	20424052	C	A	7.92424	4.49893	0.0792498	bio13	10	0.999622
10A_20424326	10A	20424326	A	G	-5.13885	8.08895	0.525747	bio13	10	0.999622
10A_20424341	10A	20424341	C	T	7.76663	7.9179	0.327476	bio13	10	0.999622
10A_20436672	10A	20436672	T	C	18.6029	8.15545	0.0232843	bio13	10	0.999622
10A_20436722	10A	20436722	G	A	18.6029	8.15545	0.0232843	bio13	10	0.999622
10A_20437099	10A	20437099	C	T	18.6277	8.05313	0.0214293	bio13	10	0.999622
10A_20437100	10A	20437100	C	T	-1.3794	13.9065	0.921056	bio13	10	0.999622
10A_20437133	10A	20437133	G	A	19.8218	8.46006	0.0198182	bio13	10	0.999622
10A_20437279	10A	20437279	G	A	14.6579	7.49314	0.0514216	bio13	10	0.999622
10A_20437315	10A	20437315	T	C	14.6579	7.49314	0.0514216	bio13	10	0.999622
10A_20443512	10A	20443512	T	C	-4.31667	8.07616	0.593416	bio13	10	0.999622
10A_20451510	10A	20451510	T	G	2.94193	8.51304	0.729914	bio13	10	0.999622
10A_20451516	10A	20451516	C	T	2.94193	8.51304	0.729914	bio13	10	0.999622
10A_20451541	10A	20451541	G	C	1.89979	8.84007	0.829993	bio13	10	0.999622
10A_20451544	10A	20451544	T	C	-0.0543944	4.85832	0.991075	bio13	10	0.999622
10A_20451550	10A	20451550	T	C	11.4076	16.2162	0.482339	bio13	10	0.999622
10A_20451556	10A	20451556	C	T	2.08838	6.60074	0.751941	bio13	10	0.999622
10A_20451816	10A	20451816	T	G	2.49979	6.68199	0.708602	bio13	10	0.999622
10A_20451834	10A	20451834	G	A	4.51817	6.83827	0.509327	bio13	10	0.999622
10A_20451872	10A	20451872	A	G	21.9897	12.6484	0.0831949	bio13	10	0.999622
10A_20451873	10A	20451873	C	T	15.4354	10.7641	0.152679	bio13	10	0.999622
10A_20533932	10A	20533932	C	G	-14.6138	12.4115	0.240003	bio13	10	0.999622
10A_20568140	10A	20568140	A	G	1.10492	6.84714	0.871917	bio13	10	0.999622
10A_20845267	10A	20845267	A	G	-2.77968	7.02592	0.692673	bio13	10	0.999622
10A_20947312	10A	20947312	G	A	-8.21469	8.35911	0.326577	bio13	10	0.999622
10A_20947314	10A	20947314	C	G	-9.11683	8.13536	0.263383	bio13	10	0.999622
10A_20948975	10A	20948975	G	T	-9.11683	8.13536	0.263383	bio13	10	0.999622
10A_21051893	10A	21051893	C	T	-4.561	8.83104	0.605924	bio13	10	0.999622
10A_21070773	10A	21070773	C	T	-6.43925	7.95463	0.418904	bio13	10	0.999622
10A_21144864	10A	21144864	T	C	-6.43925	7.95463	0.418904	bio13	10	0.999622
10A_21144882	10A	21144882	C	T	-10.3407	7.54438	0.171564	bio13	10	0.999622
10A_21145155	10A	21145155	A	G	-6.83166	7.6631	0.373413	bio13	10	0.999622
10A_21196866	10A	21196866	C	T	-7.54014	7.67619	0.326797	bio13	10	0.999622
10A_21196924	10A	21196924	G	A	-8.53358	7.56186	0.260057	bio13	10	0.999622
10A_21267696	10A	21267696	G	A	-5.38165	7.67744	0.483894	bio13	10	0.999622
10A_21311552	10A	21311552	C	T	-4.79359	7.60121	0.528785	bio13	10	0.999622
10A_21311553	10A	21311553	A	G	-4.79359	7.60121	0.528785	bio13	10	0.999622
10A_21329913	10A	21329913	C	A	-6.1741	7.6866	0.422511	bio13	10	0.999622
10A_21339882	10A	21339882	A	C	-9.12475	7.52335	0.226188	bio13	10	0.999622
10A_21339892	10A	21339892	T	C	21.9897	12.6484	0.0831949	bio13	10	0.999622
10A_21340144	10A	21340144	C	A	-4.80038	7.51332	0.523391	bio13	10	0.999622
10A_21379206	10A	21379206	G	T	11.3943	11.7976	0.334955	bio13	10	0.999622
10A_21379224	10A	21379224	G	C	-1.10993	7.93281	0.888825	bio13	10	0.999622
10A_21379245	10A	21379245	C	T	-26.338	12.5451	0.0366561	bio13	10	0.999622
10A_21379496	10A	21379496	A	G	4.97361	11.5042	0.665828	bio13	10	0.999622
10A_21413915	10A	21413915	A	C	4.97361	11.5042	0.665828	bio13	10	0.999622
10A_21414183	10A	21414183	G	A	4.97361	11.5042	0.665828	bio13	10	0.999622
10A_21415564	10A	21415564	A	T	4.97361	11.5042	0.665828	bio13	10	0.999622
10A_21496512	10A	21496512	C	T	4.97361	11.5042	0.665828	bio13	10	0.999622
10A_21544208	10A	21544208	A	T	6.28084	11.8656	0.596988	bio13	10	0.999622
10A_21608532	10A	21608532	A	C	6.28084	11.8656	0.596988	bio13	10	0.999622
10A_21667922	10A	21667922	G	A	6.28084	11.8656	0.596988	bio13	10	0.999622
10A_21667970	10A	21667970	G	A	6.28084	11.8656	0.596988	bio13	10	0.999622
10A_21668192	10A	21668192	T	C	4.97361	11.5042	0.665828	bio13	10	0.999622
10A_21668230	10A	21668230	T	G	0.86556	13.484	0.948863	bio13	10	0.999622
10A_21722495	10A	21722495	T	C	2.69081	11.2056	0.810402	bio13	10	0.999622
10A_21734080	10A	21734080	T	G	4.68572	13.7949	0.734354	bio13	10	0.999622
10A_21734101	10A	21734101	C	A	4.68572	13.7949	0.734354	bio13	10	0.999622
10A_22115141	10A	22115141	C	A	1.77899	5.33243	0.738915	bio13	10	0.999622
10A_22137166	10A	22137166	T	C	4.32955	12.2206	0.723389	bio13	10	0.999622
10A_22166334	10A	22166334	G	C	6.28084	11.8656	0.596988	bio13	10	0.999622
10A_22169521	10A	22169521	A	G	10.3118	12.7306	0.418617	bio13	10	0.999622
10A_22228431	10A	22228431	T	C	6.28084	11.8656	0.596988	bio13	10	0.999622
10A_22403863	10A	22403863	A	G	6.24388	14.9109	0.675717	bio13	10	0.999622
10A_22533792	10A	22533792	G	A	5.50733	13.5515	0.684754	bio13	10	0.999622
10A_22542843	10A	22542843	G	T	5.50733	13.5515	0.684754	bio13	10	0.999622
10A_22556897	10A	22556897	A	C	7.25259	14.1913	0.609707	bio13	10	0.999622
10A_22589762	10A	22589762	G	A	7.25259	14.1913	0.609707	bio13	10	0.999622
10A_22589824	10A	22589824	C	T	5.61185	14.2853	0.694732	bio13	10	0.999622
10A_22621962	10A	22621962	A	C	1.95213	5.42662	0.719314	bio13	10	0.999622
10A_22622249	10A	22622249	A	G	5.23542	6.36808	0.411687	bio13	10	0.999622
10A_22622283	10A	22622283	C	T	14.6706	10.4586	0.161783	bio13	10	0.999622
10A_22633978	10A	22633978	T	C	-13.072	10.8354	0.228658	bio13	10	0.999622
10A_22634008	10A	22634008	A	G	5.61185	14.2853	0.694732	bio13	10	0.999622
10A_22691789	10A	22691789	A	G	-1.18764	13.6529	0.930742	bio13	10	0.999622
10A_22691857	10A	22691857	A	G	6.00919	13.5352	0.657403	bio13	10	0.999622
10A_22692056	10A	22692056	A	G	7.06078	14.2347	0.620259	bio13	10	0.999622
10A_22801448	10A	22801448	G	A	-1.1806	5.29603	0.823756	bio13	10	0.999622
10A_22801479	10A	22801479	C	T	-2.67726	5.33862	0.616414	bio13	10	0.999622
10A_22808361	10A	22808361	G	T	4.36988	3.8846	0.261567	bio13	10	0.999622
10A_22808621	10A	22808621	A	C	-6.82455	11.1884	0.542371	bio13	10	0.999622
10A_22867568	10A	22867568	G	A	-6.82455	11.1884	0.542371	bio13	10	0.999622
10A_22867570	10A	22867570	C	G	-0.938468	5.71526	0.869687	bio13	10	0.999622
10A_22867610	10A	22867610	A	G	-2.37926	4.86603	0.625251	bio13	10	0.999622
10A_22867628	10A	22867628	G	A	-4.8627	10.1173	0.631146	bio13	10	0.999622
10A_22973700	10A	22973700	T	C	-4.20857	10.3461	0.684478	bio13	10	0.999622
10A_23041776	10A	23041776	T	C	-4.20857	10.3461	0.684478	bio13	10	0.999622
10A_23107787	10A	23107787	C	T	-4.25598	9.89438	0.667417	bio13	10	0.999622
10A_23108103	10A	23108103	A	G	-6.49507	11.3441	0.567399	bio13	10	0.999622
10A_23108108	10A	23108108	C	T	-4.25598	9.89438	0.667417	bio13	10	0.999622
10A_23108116	10A	23108116	C	T	-7.45277	4.2327	0.0793513	bio13	10	0.999622
10A_23108140	10A	23108140	G	A	-4.92989	4.28963	0.251414	bio13	10	0.999622
10A_23114805	10A	23114805	G	C	-3.89602	4.46779	0.38393	bio13	10	0.999622
10A_23157666	10A	23157666	G	T	-3.89602	4.46779	0.38393	bio13	10	0.999622
10A_23181010	10A	23181010	C	A	-3.45139	4.33754	0.426868	bio13	10	0.999622
10A_23244221	10A	23244221	C	T	-4.19378	4.36603	0.337594	bio13	10	0.999622
10A_23244490	10A	23244490	T	A	9.1195	7.81576	0.244262	bio13	10	0.999622
10A_23244491	10A	23244491	G	C	2.25004	3.95786	0.570144	bio13	10	0.999622
10A_23261645	10A	23261645	T	A	-19.7667	13.7378	0.151289	bio13	10	0.999622
10A_23299163	10A	23299163	C	T	5.83955	4.31534	0.177061	bio13	10	0.999622
10A_23299243	10A	23299243	G	A	5.61818	4.32604	0.195101	bio13	10	0.999622
10A_23299445	10A	23299445	T	C	4.06381	11.8858	0.732674	bio13	10	0.999622
10A_23299452	10A	23299452	C	T	5.9596	10.8612	0.583638	bio13	10	0.999622
10A_23299524	10A	23299524	A	T	6.58173	10.671	0.537868	bio13	10	0.999622
10A_23299525	10A	23299525	A	T	6.58173	10.671	0.537868	bio13	10	0.999622
10A_23310400	10A	23310400	T	C	6.26534	10.7543	0.560631	bio13	10	0.999622
10A_23398575	10A	23398575	G	A	14.0059	9.13634	0.126389	bio13	10	0.999622
10A_23398594	10A	23398594	C	T	-0.108975	4.30068	0.979802	bio13	10	0.999622
10A_23398599	10A	23398599	A	G	7.74531	8.45477	0.360395	bio13	10	0.999622
10A_23398608	10A	23398608	G	A	6.85609	13.7819	0.619241	bio13	10	0.999622
10A_23398617	10A	23398617	T	C	3.90972	5.40309	0.4699	bio13	10	0.999622
10A_23398622	10A	23398622	G	A	-2.49291	3.33168	0.45493	bio13	10	0.999622
10A_23398658	10A	23398658	C	T	-2.38441	4.57874	0.602941	bio13	10	0.999622
10A_23398666	10A	23398666	G	A	-4.06588	4.48189	0.365079	bio13	10	0.999622
10A_23413277	10A	23413277	A	G	-3.20087	5.06163	0.527645	bio13	10	0.999622
10A_23542472	10A	23542472	A	G	10.6802	10.4215	0.306314	bio13	10	0.999622
10A_23566769	10A	23566769	A	G	-3.23489	4.9311	0.512342	bio13	10	0.999622
10B_300071	10B	300071	C	T	-3.89066	4.83743	0.421904	bio13	10	0.999622
10B_300315	10B	300315	G	A	13.577	8.67368	0.118619	bio13	10	0.999622
10B_300317	10B	300317	T	C	-4.42257	9.32113	0.63553	bio13	10	0.999622
10B_300331	10B	300331	C	T	-11.9778	11.2933	0.289765	bio13	10	0.999622
10B_300345	10B	300345	C	T	-11.0028	10.9817	0.317231	bio13	10	0.999622
10B_300370	10B	300370	C	A	9.73938	9.87037	0.324613	bio13	10	0.999622
10B_372643	10B	372643	A	G	12.5716	13.3745	0.34803	bio13	10	0.999622
10B_402855	10B	402855	G	A	2.40272	5.4265	0.658264	bio13	10	0.999622
10B_410960	10B	410960	A	T	-1.02625	4.98739	0.837118	bio13	10	0.999622
10B_411171	10B	411171	G	T	-0.842626	3.32413	0.800074	bio13	10	0.999622
10B_450032	10B	450032	G	A	-0.842626	3.32413	0.800074	bio13	10	0.999622
10B_450037	10B	450037	T	C	2.40707	3.50147	0.492361	bio13	10	0.999622
10B_456184	10B	456184	A	T	-1.62833	4.08411	0.690413	bio13	10	0.999622
10B_538569	10B	538569	G	A	1.47232	3.41649	0.666833	bio13	10	0.999622
10B_637045	10B	637045	C	T	-8.35116	17.2021	0.627713	bio13	10	0.999622
10B_637304	10B	637304	G	A	-6.85205	14.3614	0.633645	bio13	10	0.999622
10B_703445	10B	703445	T	C	-6.85205	14.3614	0.633645	bio13	10	0.999622
10B_703460	10B	703460	T	C	36.074	16.6956	0.0315525	bio13	10	0.999622
10B_787361	10B	787361	C	T	-2.26278	6.24526	0.717382	bio13	10	0.999622
10B_787654	10B	787654	T	C	-1.16049	6.4494	0.857329	bio13	10	0.999622
10B_851629	10B	851629	A	G	-11.3045	11.5245	0.327468	bio13	10	0.999622
10B_851668	10B	851668	A	G	2.30065	3.16484	0.467858	bio13	10	0.999622
10B_942700	10B	942700	G	A	-3.81654	8.1735	0.640899	bio13	10	0.999622
10B_942740	10B	942740	G	A	-2.85574	5.98273	0.633492	bio13	10	0.999622
10B_942755	10B	942755	A	G	-3.58086	7.08137	0.613477	bio13	10	0.999622
10B_942765	10B	942765	T	G	-18.5033	12.8779	0.151864	bio13	10	0.999622
10B_943006	10B	943006	A	G	-9.20809	5.62597	0.102795	bio13	10	0.999622
10B_1024249	10B	1024249	G	T	-9.19039	7.37355	0.213641	bio13	10	0.999622
10B_1024327	10B	1024327	C	T	-7.66911	7.62639	0.31546	bio13	10	0.999622
10B_1173413	10B	1173413	G	T	-7.80702	12.5355	0.533919	bio13	10	0.999622
10B_1200537	10B	1200537	C	T	3.71413	13.0231	0.775702	bio13	10	0.999622
10B_1251644	10B	1251644	A	G	-2.57228	9.65823	0.790177	bio13	10	0.999622
10B_1367925	10B	1367925	T	C	-1.1881	9.43783	0.89991	bio13	10	0.999622
10B_1608476	10B	1608476	T	C	-1.1881	9.43783	0.89991	bio13	10	0.999622
10B_1645699	10B	1645699	T	C	-1.1881	9.43783	0.89991	bio13	10	0.999622
10B_1645914	10B	1645914	T	C	-1.1881	9.43783	0.89991	bio13	10	0.999622
10B_1645929	10B	1645929	C	T	-1.89964	9.60346	0.843337	bio13	10	0.999622
10B_1651408	10B	1651408	A	C	16.0355	12.936	0.216141	bio13	10	0.999622
10B_1687206	10B	1687206	G	C	16.0355	12.936	0.216141	bio13	10	0.999622
10B_1687214	10B	1687214	A	G	16.0355	12.936	0.216141	bio13	10	0.999622
10B_1687421	10B	1687421	A	G	16.0355	12.936	0.216141	bio13	10	0.999622
10B_1721660	10B	1721660	G	A	16.0355	12.936	0.216141	bio13	10	0.999622
10B_1796060	10B	1796060	G	A	16.0355	12.936	0.216141	bio13	10	0.999622
10B_1916882	10B	1916882	T	C	16.0355	12.936	0.216141	bio13	10	0.999622
10B_1917244	10B	1917244	C	T	16.0355	12.936	0.216141	bio13	10	0.999622
10B_2023954	10B	2023954	A	C	16.0355	12.936	0.216141	bio13	10	0.999622
10B_2052405	10B	2052405	A	G	24.9956	11.4543	0.0299115	bio13	10	0.999622
10B_2052420	10B	2052420	T	A	0.585141	3.71718	0.875029	bio13	10	0.999622
10B_2052468	10B	2052468	G	A	-11.0497	12.5199	0.378212	bio13	10	0.999622
10B_2052469	10B	2052469	G	A	-11.0497	12.5199	0.378212	bio13	10	0.999622
10B_2201806	10B	2201806	G	A	-11.0497	12.5199	0.378212	bio13	10	0.999622
10B_2201811	10B	2201811	T	C	-3.29225	4.66912	0.481316	bio13	10	0.999622
10B_2220640	10B	2220640	A	G	3.79786	4.16197	0.362268	bio13	10	0.999622
10B_2220643	10B	2220643	A	G	-3.56018	6.51358	0.585096	bio13	10	0.999622
10B_2220670	10B	2220670	T	C	1.00842	4.23974	0.812168	bio13	10	0.999622
10B_2223635	10B	2223635	C	T	0.626793	4.19013	0.881195	bio13	10	0.999622
10B_2225664	10B	2225664	G	A	0.626793	4.19013	0.881195	bio13	10	0.999622
10B_2225688	10B	2225688	A	G	-0.138894	6.27549	0.982357	bio13	10	0.999622
10B_2225944	10B	2225944	C	T	-0.138894	6.27549	0.982357	bio13	10	0.999622
10B_2225951	10B	2225951	G	A	-2.69502	6.78427	0.691483	bio13	10	0.999622
10B_2296073	10B	2296073	A	G	-5.72661	6.02263	0.342487	bio13	10	0.999622
10B_2337878	10B	2337878	G	A	-3.58885	7.06423	0.611824	bio13	10	0.999622
10B_2337942	10B	2337942	G	A	-3.77234	6.43855	0.558407	bio13	10	0.999622
10B_2338139	10B	2338139	C	T	-2.02338	6.15129	0.742445	bio13	10	0.999622
10B_2353486	10B	2353486	T	C	-2.15578	6.14302	0.7259	bio13	10	0.999622
10B_2353516	10B	2353516	T	G	-0.257306	12.5071	0.983601	bio13	10	0.999622
10B_2363866	10B	2363866	A	G	3.74833	10.0639	0.709834	bio13	10	0.999622
10B_2363881	10B	2363881	C	T	-12.9907	11.8874	0.275398	bio13	10	0.999622
10B_2364083	10B	2364083	A	C	-7.19782	10.1716	0.479747	bio13	10	0.999622
10B_2388775	10B	2388775	G	A	-8.11575	10.1015	0.422404	bio13	10	0.999622
10B_2388818	10B	2388818	A	C	-7.54646	10.1802	0.45913	bio13	10	0.999622
10B_2421833	10B	2421833	C	G	-5.38116	6.04674	0.374255	bio13	10	0.999622
10B_2456018	10B	2456018	G	A	-4.20473	6.32218	0.50654	bio13	10	0.999622
10B_2465587	10B	2465587	A	G	-6.4005	6.54496	0.32894	bio13	10	0.999622
10B_2584933	10B	2584933	T	A	-4.06288	6.13775	0.508538	bio13	10	0.999622
10B_2584935	10B	2584935	G	C	-4.4957	6.43535	0.485376	bio13	10	0.999622
10B_2585158	10B	2585158	A	G	0.0301736	6.0771	0.996042	bio13	10	0.999622
10B_2585222	10B	2585222	G	A	-5.14038	10.2733	0.617206	bio13	10	0.999622
10B_2585946	10B	2585946	T	G	0.0301736	6.0771	0.996042	bio13	10	0.999622
10B_2585969	10B	2585969	A	T	23.0704	14.7148	0.11803	bio13	10	0.999622
10B_2601770	10B	2601770	T	C	23.0704	14.7148	0.11803	bio13	10	0.999622
10B_2628253	10B	2628253	C	T	6.5316	31.5176	0.835973	bio13	10	0.999622
10B_2628432	10B	2628432	T	C	-0.0563484	6.10307	0.99264	bio13	10	0.999622
10B_2851728	10B	2851728	A	G	-2.4138	6.172	0.696024	bio13	10	0.999622
10B_3063391	10B	3063391	C	A	1.47912	12.2612	0.904066	bio13	10	0.999622
10B_3079393	10B	3079393	G	C	-1.57611	6.22675	0.800359	bio13	10	0.999622
10B_3089554	10B	3089554	G	C	-2.50329	6.11096	0.682378	bio13	10	0.999622
10B_3089578	10B	3089578	T	A	-20.1018	18.1597	0.269251	bio13	10	0.999622
10B_3106714	10B	3106714	G	T	-45.6467	47.45	0.336867	bio13	10	0.999622
10B_3106754	10B	3106754	C	T	-3.7418	6.47997	0.564098	bio13	10	0.999622
10B_3119232	10B	3119232	T	G	-4.79538	6.09285	0.431906	bio13	10	0.999622
10B_3394793	10B	3394793	T	C	-5.02657	6.07336	0.408565	bio13	10	0.999622
10B_3622468	10B	3622468	A	G	-4.78618	13.1772	0.716712	bio13	10	0.999622
10B_3926620	10B	3926620	T	A	-0.96946	6.40707	0.879837	bio13	10	0.999622
10B_3926930	10B	3926930	G	A	2.07351	6.30789	0.742611	bio13	10	0.999622
10B_3926931	10B	3926931	A	G	2.07351	6.30789	0.742611	bio13	10	0.999622
10B_4278251	10B	4278251	C	T	7.93014	9.22418	0.39067	bio13	10	0.999622
10B_4312121	10B	4312121	G	T	-0.735489	6.68725	0.9125	bio13	10	0.999622
10B_4547070	10B	4547070	G	C	-1.11438	5.86684	0.849487	bio13	10	0.999622
10B_4735642	10B	4735642	G	A	-1.11438	5.86684	0.849487	bio13	10	0.999622
10B_4750747	10B	4750747	C	G	-3.99796	6.32454	0.527806	bio13	10	0.999622
10B_4869323	10B	4869323	G	A	-3.6497	6.29413	0.562469	bio13	10	0.999622
10B_4869624	10B	4869624	T	A	-24.4794	16.9541	0.149876	bio13	10	0.999622
10B_4922209	10B	4922209	G	A	1.04235	6.08955	0.864211	bio13	10	0.999622
10B_4922256	10B	4922256	C	T	-2.60717	6.47962	0.687717	bio13	10	0.999622
10B_4922512	10B	4922512	G	A	-1.71563	6.47985	0.791382	bio13	10	0.999622
10B_4978473	10B	4978473	C	T	-4.65846	6.89212	0.499645	bio13	10	0.999622
10B_5114724	10B	5114724	T	A	-4.17422	6.23401	0.503662	bio13	10	0.999622
10B_5116246	10B	5116246	T	C	-2.85343	6.22127	0.64683	bio13	10	0.999622
10B_5172023	10B	5172023	A	T	-16.963	14.7832	0.252158	bio13	10	0.999622
10B_5172278	10B	5172278	G	A	-5.01149	6.27153	0.424906	bio13	10	0.999622
10B_5193028	10B	5193028	G	A	-5.01149	6.27153	0.424906	bio13	10	0.999622
10B_5231015	10B	5231015	T	C	-1.11807	13.2026	0.932571	bio13	10	0.999622
10B_5236289	10B	5236289	C	T	-1.53207	5.77984	0.791146	bio13	10	0.999622
10B_5303733	10B	5303733	T	C	-16.963	14.7832	0.252158	bio13	10	0.999622
10B_5304006	10B	5304006	A	T	11.2198	15.7565	0.476999	bio13	10	0.999622
10B_5304025	10B	5304025	T	G	11.2198	15.7565	0.476999	bio13	10	0.999622
10B_5304052	10B	5304052	T	C	-1.24992	5.62856	0.824421	bio13	10	0.999622
10B_5304053	10B	5304053	C	T	14.0147	16.7453	0.403331	bio13	10	0.999622
10B_5304096	10B	5304096	T	A	11.2198	15.7565	0.476999	bio13	10	0.999622
10B_5304113	10B	5304113	T	A	33.2371	17.6839	0.0611942	bio13	10	0.999622
10B_5304409	10B	5304409	G	T	7.41381	5.2851	0.161773	bio13	10	0.999622
10B_5304457	10B	5304457	G	A	-2.82394	6.51186	0.664863	bio13	10	0.999622
10B_5304461	10B	5304461	G	T	-0.00770131	6.00253	0.998977	bio13	10	0.999895
10B_5304486	10B	5304486	A	G	-1.04563	6.07274	0.863415	bio13	10	0.999622
10B_5334971	10B	5334971	T	C	-4.27621	6.5723	0.515802	bio13	10	0.999622
10B_5410867	10B	5410867	A	G	-2.35267	12.6411	0.852489	bio13	10	0.999622
10B_5553650	10B	5553650	G	A	-6.23907	6.43426	0.333036	bio13	10	0.999622
10B_5796635	10B	5796635	T	A	-7.98718	6.88278	0.246833	bio13	10	0.999622
10B_5851584	10B	5851584	A	G	-0.995048	5.12543	0.846205	bio13	10	0.999622
10B_5894060	10B	5894060	G	A	0.505673	5.0933	0.920984	bio13	10	0.999622
10B_5894070	10B	5894070	T	G	-0.134472	18.3872	0.99417	bio13	10	0.999622
10B_5894071	10B	5894071	G	A	2.17765	4.11157	0.596775	bio13	10	0.999622
10B_5898007	10B	5898007	G	A	0.850028	4.10191	0.83598	bio13	10	0.999622
10B_5898230	10B	5898230	C	A	-5.09895	12.4505	0.682454	bio13	10	0.999622
10B_5906091	10B	5906091	C	T	-7.59804	18.0898	0.674789	bio13	10	0.999622
10B_5927965	10B	5927965	C	T	0.929341	4.27284	0.827975	bio13	10	0.999622
10B_5949625	10B	5949625	A	G	-7.59804	18.0898	0.674789	bio13	10	0.999622
10B_5949654	10B	5949654	T	C	0.958738	4.29568	0.82355	bio13	10	0.999622
10B_5949668	10B	5949668	C	T	1.60522	4.31168	0.709949	bio13	10	0.999622
10B_5949684	10B	5949684	C	T	0.434929	4.21352	0.917859	bio13	10	0.999622
10B_6002104	10B	6002104	T	C	4.59748	8.54422	0.590941	bio13	10	0.999622
10B_6002292	10B	6002292	G	A	-7.59804	18.0898	0.674789	bio13	10	0.999622
10B_6006676	10B	6006676	A	G	2.31534	4.1459	0.576965	bio13	10	0.999622
10B_6006858	10B	6006858	A	G	1.86884	4.15924	0.653541	bio13	10	0.999622
10B_6006994	10B	6006994	A	G	0.284152	7.40038	0.969398	bio13	10	0.999622
10B_6096677	10B	6096677	G	A	-1.4991	3.79233	0.692919	bio13	10	0.999622
10B_6194228	10B	6194228	T	A	8.41895	10.8062	0.436575	bio13	10	0.999622
10B_6475152	10B	6475152	A	G	-3.3539	3.74156	0.370801	bio13	10	0.999622
10B_6584340	10B	6584340	C	A	3.21381	7.13706	0.652837	bio13	10	0.999622
10B_6773904	10B	6773904	C	T	2.53446	3.84067	0.50985	bio13	10	0.999622
10B_6944635	10B	6944635	T	G	2.53446	3.84067	0.50985	bio13	10	0.999622
10B_6944642	10B	6944642	G	A	3.24772	3.8631	0.401219	bio13	10	0.999622
10B_7109116	10B	7109116	G	A	3.24772	3.8631	0.401219	bio13	10	0.999622
10B_7164428	10B	7164428	T	C	3.18312	3.86804	0.411237	bio13	10	0.999622
10B_7420802	10B	7420802	A	C	2.24938	3.88424	0.562976	bio13	10	0.999622
10B_7448638	10B	7448638	A	G	3.07351	3.90369	0.431741	bio13	10	0.999622
10B_7480704	10B	7480704	T	C	1.92532	3.89479	0.621451	bio13	10	0.999622
10B_7541540	10B	7541540	C	T	1.58328	3.93383	0.687634	bio13	10	0.999622
10B_7541670	10B	7541670	T	G	1.4519	3.93004	0.712077	bio13	10	0.999622
10B_7642597	10B	7642597	G	C	1.4519	3.93004	0.712077	bio13	10	0.999622
10B_7655350	10B	7655350	A	C	1.92532	3.89479	0.621451	bio13	10	0.999622
10B_7655363	10B	7655363	C	G	-9.91282	6.23126	0.112758	bio13	10	0.999622
10B_7754261	10B	7754261	T	G	0.0448373	3.90182	0.990839	bio13	10	0.999622
10B_7754270	10B	7754270	G	A	2.42148	3.93202	0.538494	bio13	10	0.999622
10B_7754547	10B	7754547	G	T	3.01985	3.90195	0.439612	bio13	10	0.999622
10B_7755830	10B	7755830	T	C	2.55617	3.9355	0.516527	bio13	10	0.999622
10B_7755854	10B	7755854	G	A	2.26279	3.82184	0.554273	bio13	10	0.999622
10B_7813200	10B	7813200	A	T	1.97158	3.82109	0.606272	bio13	10	0.999622
10B_7833087	10B	7833087	C	T	2.046	3.8247	0.593106	bio13	10	0.999622
10B_7919080	10B	7919080	C	T	-0.127359	4.15876	0.975591	bio13	10	0.999622
10B_7939528	10B	7939528	A	T	3.22876	4.20567	0.443291	bio13	10	0.999622
10B_7970398	10B	7970398	A	G	1.76005	4.12714	0.670096	bio13	10	0.999622
10B_8045267	10B	8045267	C	T	1.64529	3.99933	0.681095	bio13	10	0.999622
10B_8086754	10B	8086754	G	A	2.60457	4.12237	0.528014	bio13	10	0.999622
10B_8149040	10B	8149040	C	G	0.619539	4.10696	0.8802	bio13	10	0.999622
10B_8190341	10B	8190341	C	G	0.619539	4.10696	0.8802	bio13	10	0.999622
10B_8205707	10B	8205707	C	A	-3.90949	3.17736	0.219555	bio13	10	0.999622
10B_8236944	10B	8236944	G	T	-0.17453	15.3907	0.99096	bio13	10	0.999622
10B_8236952	10B	8236952	G	T	-0.17453	15.3907	0.99096	bio13	10	0.999622
10B_8239107	10B	8239107	G	A	-0.17453	15.3907	0.99096	bio13	10	0.999622
10B_8239156	10B	8239156	T	A	-7.93881	4.49596	0.078506	bio13	10	0.999622
10B_8239168	10B	8239168	C	T	-7.57702	4.25116	0.0757578	bio13	10	0.999622
10B_8239838	10B	8239838	G	A	-1.20535	4.98389	0.809071	bio13	10	0.999622
10B_8423463	10B	8423463	C	T	-7.02502	4.29534	0.103049	bio13	10	0.999622
10B_8453554	10B	8453554	G	A	1.46523	6.11958	0.810942	bio13	10	0.999622
10B_8453885	10B	8453885	G	T	4.88181	4.92921	0.322827	bio13	10	0.999622
10B_8454230	10B	8454230	T	C	4.88181	4.92921	0.322827	bio13	10	0.999622
10B_8454244	10B	8454244	A	G	10.701	4.44101	0.016605	bio13	10	0.999622
10B_8454254	10B	8454254	A	T	10.9198	5.16387	0.035328	bio13	10	0.999622
10B_8454274	10B	8454274	C	T	2.01926	5.71671	0.724184	bio13	10	0.999622
10B_8454276	10B	8454276	G	A	11.223	4.7378	0.0185121	bio13	10	0.999622
10B_8488337	10B	8488337	A	G	11.223	4.7378	0.0185121	bio13	10	0.999622
10B_8638580	10B	8638580	G	A	9.15954	4.46527	0.0411534	bio13	10	0.999622
10B_8735407	10B	8735407	G	A	10.4218	4.99494	0.0378248	bio13	10	0.999622
10B_8783812	10B	8783812	C	G	7.46663	4.33581	0.0861388	bio13	10	0.999622
10B_8812495	10B	8812495	C	T	8.50293	4.48515	0.0589983	bio13	10	0.999622
10B_8889705	10B	8889705	G	A	0.785422	4.84269	0.871274	bio13	10	0.999622
10B_8963272	10B	8963272	T	C	5.63833	4.75553	0.236753	bio13	10	0.999622
10B_8977919	10B	8977919	A	G	-5.23274	5.26095	0.320756	bio13	10	0.999622
10B_8978277	10B	8978277	C	T	-8.7379	8.50598	0.305167	bio13	10	0.999622
10B_8985237	10B	8985237	C	T	-0.194501	4.75317	0.967388	bio13	10	0.999622
10B_8985278	10B	8985278	G	A	23.8221	16.3393	0.145953	bio13	10	0.999622
10B_9126378	10B	9126378	A	C	24.6078	21.1322	0.245207	bio13	10	0.999622
10B_9126461	10B	9126461	A	G	18.4879	17.4342	0.289842	bio13	10	0.999622
10B_9128119	10B	9128119	G	A	18.4879	17.4342	0.289842	bio13	10	0.999622
10B_9141246	10B	9141246	C	T	18.4879	17.4342	0.289842	bio13	10	0.999622
10B_9141334	10B	9141334	C	A	18.4879	17.4342	0.289842	bio13	10	0.999622
10B_9170933	10B	9170933	A	T	18.4879	17.4342	0.289842	bio13	10	0.999622
10B_9171200	10B	9171200	T	C	21.1075	13.9911	0.1325	bio13	10	0.999622
10B_9187874	10B	9187874	A	G	19.5843	14.6264	0.181649	bio13	10	0.999622
10B_9188207	10B	9188207	G	T	20.5285	16.6968	0.219903	bio13	10	0.999622
10B_9189811	10B	9189811	C	T	20.5285	16.6968	0.219903	bio13	10	0.999622
10B_9484252	10B	9484252	T	C	-0.248428	6.07812	0.967426	bio13	10	0.999622
10B_9568690	10B	9568690	G	A	-0.821042	5.93712	0.890109	bio13	10	0.999622
10B_9570447	10B	9570447	C	T	1.02044	4.5833	0.823972	bio13	10	0.999622
10B_9583155	10B	9583155	G	T	2.44916	5.595	0.661906	bio13	10	0.999622
10B_9583195	10B	9583195	C	T	-7.60509	13.7234	0.579896	bio13	10	0.999622
10B_9584639	10B	9584639	T	A	-3.86061	5.44707	0.479059	bio13	10	0.999622
10B_9584641	10B	9584641	T	A	-2.37617	6.59263	0.718794	bio13	10	0.999622
10B_9584657	10B	9584657	C	T	4.23065	5.43188	0.436711	bio13	10	0.999622
10B_9755098	10B	9755098	T	G	-20.2554	8.11059	0.00144403	bio13	10	0.972233
10B_9755120	10B	9755120	A	G	-2.08061	5.92987	0.725945	bio13	10	0.999622
10B_9755346	10B	9755346	C	T	2.83432	5.92216	0.632594	bio13	10	0.999622
10B_9756325	10B	9756325	A	G	5.6848	13.7772	0.680193	bio13	10	0.999622
10B_9800907	10B	9800907	T	C	3.35524	5.36782	0.532428	bio13	10	0.999622
10B_9831694	10B	9831694	A	T	13.6183	11.486	0.236753	bio13	10	0.999622
10B_9856550	10B	9856550	A	G	11.4019	10.9123	0.296969	bio13	10	0.999622
10B_9856551	10B	9856551	T	G	-2.48888	5.92506	0.674759	bio13	10	0.999622
10B_9856785	10B	9856785	G	A	23.234	11.8373	0.0506438	bio13	10	0.999622
10B_9856834	10B	9856834	G	C	23.234	11.8373	0.0506438	bio13	10	0.999622
10B_9866744	10B	9866744	T	C	9.48552	12.9864	0.465732	bio13	10	0.999622
10B_9866827	10B	9866827	C	A	1.90619	5.75467	0.740705	bio13	10	0.999622
10B_9866828	10B	9866828	T	C	10.6565	5.5439	0.0555761	bio13	10	0.999622
10B_9913606	10B	9913606	G	A	-8.4672	6.79957	0.21406	bio13	10	0.999622
10B_9949649	10B	9949649	A	G	-8.4672	6.79957	0.21406	bio13	10	0.999622
10B_9949688	10B	9949688	G	A	-3.07689	4.98114	0.537261	bio13	10	0.999622
10B_9949966	10B	9949966	C	A	12.5495	13.8188	0.364569	bio13	10	0.999622
10B_9950000	10B	9950000	C	T	-15.168	5.72365	0.00849748	bio13	10	0.999622
10B_9950327	10B	9950327	G	A	-8.79297	5.21049	0.0925911	bio13	10	0.999622
10B_9950331	10B	9950331	A	C	5.38277	10.0095	0.591159	bio13	10	0.999622
10B_9972838	10B	9972838	C	T	-15.2083	5.45798	0.00568691	bio13	10	0.999622
10B_9973134	10B	9973134	C	A	-2.08809	7.83448	0.790027	bio13	10	0.999622
10B_10027653	10B	10027653	T	G	-4.1679	8.30178	0.616021	bio13	10	0.999622
10B_10070671	10B	10070671	C	A	-18.3839	5.52323	0.000988083	bio13	10	0.741582
10B_10071042	10B	10071042	A	G	-4.58183	8.38158	0.585044	bio13	10	0.999622
10B_10097073	10B	10097073	T	A	-4.58183	8.38158	0.585044	bio13	10	0.999622
10B_10134895	10B	10134895	G	A	9.93598	16.3213	0.54316	bio13	10	0.999622
10B_10134898	10B	10134898	A	G	-13.9568	4.68995	0.0031718	bio13	10	0.999622
10B_10134917	10B	10134917	C	T	-6.46928	7.93621	0.415662	bio13	10	0.999622
10B_10191839	10B	10191839	C	A	-6.46928	7.93621	0.415662	bio13	10	0.999622
10B_10199765	10B	10199765	A	C	-0.735155	7.06732	0.917225	bio13	10	0.999622
10B_10199794	10B	10199794	C	T	-5.89822	7.73049	0.446106	bio13	10	0.999622
10B_10215153	10B	10215153	G	A	-5.89822	7.73049	0.446106	bio13	10	0.999622
10B_10215448	10B	10215448	A	G	-4.10962	11.6786	0.725178	bio13	10	0.999622
10B_10215479	10B	10215479	A	G	-18.9553	6.15038	0.00225757	bio13	10	0.999622
10B_10215522	10B	10215522	C	T	-6.46928	7.93621	0.415662	bio13	10	0.999622
10B_10247598	10B	10247598	A	G	-6.46928	7.93621	0.415662	bio13	10	0.999622
10B_10247643	10B	10247643	C	A	-5.89822	7.73049	0.446106	bio13	10	0.999622
10B_10247649	10B	10247649	C	G	-5.89822	7.73049	0.446106	bio13	10	0.999622
10B_10259444	10B	10259444	G	T	-5.89822	7.73049	0.446106	bio13	10	0.999622
10B_10286080	10B	10286080	C	T	-15.2681	4.54616	0.000890488	bio13	10	0.719455
10B_10286388	10B	10286388	T	C	-17.2714	5.21236	0.00104026	bio13	10	0.741582
10B_10332082	10B	10332082	G	T	12.6565	8.01761	0.11554	bio13	10	0.999622
10B_10548058	10B	10548058	C	T	12.9832	8.17608	0.113406	bio13	10	0.999622
10B_10549559	10B	10549559	C	T	24.1104	11.9529	0.0446206	bio13	10	0.999622
10B_10549643	10B	10549643	C	T	16.9928	8.73794	0.0527936	bio13	10	0.999622
10B_10549902	10B	10549902	C	A	15.4827	8.75277	0.0779811	bio13	10	0.999622
10B_10584886	10B	10584886	G	T	19.3967	8.55958	0.0241967	bio13	10	0.999622
10B_10646666	10B	10646666	G	A	6.86226	7.72255	0.374968	bio13	10	0.999622
10B_10742837	10B	10742837	C	T	13.4688	8.32104	0.106629	bio13	10	0.999622
10B_10751473	10B	10751473	G	A	15.6455	8.40365	0.0636678	bio13	10	0.999622
10B_10793726	10B	10793726	C	A	15.6455	8.40365	0.0636678	bio13	10	0.999622
10B_11161037	10B	11161037	G	A	15.6455	8.40365	0.0636678	bio13	10	0.999622
10B_11238488	10B	11238488	G	T	1.63033	3.57907	0.649084	bio13	10	0.999622
10B_11272391	10B	11272391	C	T	-2.93916	4.17306	0.48181	bio13	10	0.999622
10B_11458588	10B	11458588	T	A	-2.09815	4.19418	0.617283	bio13	10	0.999622
10B_11458800	10B	11458800	G	A	-2.3593	4.18189	0.573082	bio13	10	0.999622
10B_11801177	10B	11801177	A	G	-1.87939	4.18001	0.65333	bio13	10	0.999622
10B_11834052	10B	11834052	G	A	-1.1892	4.68703	0.799895	bio13	10	0.999622
10B_11834089	10B	11834089	A	G	-1.00233	4.50875	0.824234	bio13	10	0.999622
10B_11851354	10B	11851354	C	T	-0.311346	4.57934	0.945842	bio13	10	0.999622
10B_11882458	10B	11882458	C	T	1.22226	4.0361	0.762239	bio13	10	0.999622
10B_11882686	10B	11882686	C	T	1.22226	4.0361	0.762239	bio13	10	0.999622
10B_11965013	10B	11965013	A	G	1.15033	4.02501	0.775243	bio13	10	0.999622
10B_11973903	10B	11973903	T	G	1.22226	4.0361	0.762239	bio13	10	0.999622
10B_12123810	10B	12123810	A	G	0.994578	3.95931	0.80184	bio13	10	0.999622
10B_12123827	10B	12123827	A	G	0.375196	4.03459	0.925973	bio13	10	0.999622
10B_12123857	10B	12123857	A	G	-3.51122	3.9406	0.373661	bio13	10	0.999622
10B_12124078	10B	12124078	G	A	13.1763	8.47865	0.121281	bio13	10	0.999622
10B_12246237	10B	12246237	G	T	-4.17167	3.96307	0.293399	bio13	10	0.999622
10B_12399037	10B	12399037	C	T	-0.134472	18.3872	0.99417	bio13	10	0.999622
10B_12399301	10B	12399301	G	A	8.45072	12.3983	0.496043	bio13	10	0.999622
10B_12687772	10B	12687772	C	T	5.24487	12.9334	0.685392	bio13	10	0.999622
10B_12762240	10B	12762240	C	T	-5.40421	3.39044	0.112055	bio13	10	0.999622
10B_12762249	10B	12762249	G	A	-5.40421	3.39044	0.112055	bio13	10	0.999622
10B_12762280	10B	12762280	C	G	-1.20106	3.80502	0.752498	bio13	10	0.999622
10B_12762291	10B	12762291	T	C	-13.9763	15.3831	0.364358	bio13	10	0.999622
10B_12762294	10B	12762294	A	C	9.15792	7.31294	0.21149	bio13	10	0.999622
10B_12839401	10B	12839401	G	T	-2.09119	6.49462	0.747698	bio13	10	0.999622
10B_13001231	10B	13001231	G	C	6.9367	4.3885	0.115066	bio13	10	0.999622
10B_13115415	10B	13115415	A	G	-7.45296	11.311	0.510485	bio13	10	0.999622
10B_13135724	10B	13135724	G	A	-4.32092	7.4787	0.56388	bio13	10	0.999622
10B_13194512	10B	13194512	A	G	8.62468	11.4431	0.451651	bio13	10	0.999622
10B_13194520	10B	13194520	C	T	14.444	10.8254	0.183178	bio13	10	0.999622
10B_13214457	10B	13214457	A	G	-1.82891	5.6715	0.74733	bio13	10	0.999622
10B_13246500	10B	13246500	G	A	6.62566	11.7106	0.571986	bio13	10	0.999622
10B_13371689	10B	13371689	A	G	6.62566	11.7106	0.571986	bio13	10	0.999622
10B_13443381	10B	13443381	C	A	6.62566	11.7106	0.571986	bio13	10	0.999622
10B_13523246	10B	13523246	A	G	6.62566	11.7106	0.571986	bio13	10	0.999622
10B_13540650	10B	13540650	C	T	7.40489	12.9518	0.567959	bio13	10	0.999622
10B_13540710	10B	13540710	A	T	7.40489	12.9518	0.567959	bio13	10	0.999622
10B_13540979	10B	13540979	T	C	13.7789	12.0497	0.253788	bio13	10	0.999622
10B_13541023	10B	13541023	A	G	13.7789	12.0497	0.253788	bio13	10	0.999622
10B_13648189	10B	13648189	C	T	13.7789	12.0497	0.253788	bio13	10	0.999622
10B_13732866	10B	13732866	A	G	-7.09605	7.96767	0.373892	bio13	10	0.999622
10B_13732909	10B	13732909	G	C	-13.1991	14.0634	0.34876	bio13	10	0.999622
10B_13860867	10B	13860867	C	A	0.121283	9.73935	0.990073	bio13	10	0.999622
10B_13893186	10B	13893186	A	G	-2.78607	7.79729	0.721122	bio13	10	0.999622
10B_13946265	10B	13946265	C	A	0.774872	4.21254	0.854188	bio13	10	0.999622
10B_13997527	10B	13997527	G	A	-3.2374	5.0781	0.524297	bio13	10	0.999622
10B_13997560	10B	13997560	C	T	-1.57733	7.69415	0.837715	bio13	10	0.999622
10B_14007731	10B	14007731	A	T	0.690971	4.07797	0.865571	bio13	10	0.999622
10B_14019914	10B	14019914	C	G	3.06445	7.24714	0.672724	bio13	10	0.999622
10B_14131245	10B	14131245	A	G	3.74833	4.02993	0.353095	bio13	10	0.999622
10B_14131253	10B	14131253	A	G	3.74833	4.02993	0.353095	bio13	10	0.999622
10B_14131265	10B	14131265	G	A	2.05436	10.2255	0.840916	bio13	10	0.999622
10B_14132247	10B	14132247	C	A	2.26289	4.85895	0.641774	bio13	10	0.999622
10B_14180237	10B	14180237	A	G	4.50934	4.79695	0.347992	bio13	10	0.999622
10B_14323849	10B	14323849	T	G	5.47431	4.81047	0.256077	bio13	10	0.999622
10B_14330493	10B	14330493	C	G	3.11431	4.61453	0.500292	bio13	10	0.999622
10B_14331364	10B	14331364	T	A	2.01381	4.53677	0.657462	bio13	10	0.999622
10B_14331425	10B	14331425	G	A	3.45191	4.67904	0.46128	bio13	10	0.999622
10B_14331433	10B	14331433	A	G	-2.31631	5.78374	0.689098	bio13	10	0.999622
10B_14381508	10B	14381508	A	G	-16.3239	16.0008	0.308504	bio13	10	0.999622
10B_14393960	10B	14393960	C	T	-1.19067	3.93026	0.76215	bio13	10	0.999622
10B_14436383	10B	14436383	G	A	11.2239	7.00593	0.110251	bio13	10	0.999622
10B_14436806	10B	14436806	C	T	-1.26481	4.7885	0.791867	bio13	10	0.999622
10B_14498857	10B	14498857	A	G	-1.26481	4.7885	0.791867	bio13	10	0.999622
10B_14499163	10B	14499163	G	A	0.961152	4.96935	0.846771	bio13	10	0.999622
10B_14499188	10B	14499188	A	C	-14.8437	6.30328	0.0192046	bio13	10	0.999622
10B_14538361	10B	14538361	G	C	20.7849	17.5791	0.238045	bio13	10	0.999622
10B_14616522	10B	14616522	C	T	3.45693	4.93733	0.484397	bio13	10	0.999622
10B_14616528	10B	14616528	C	A	-10.362	6.28787	0.100468	bio13	10	0.999622
10B_14616851	10B	14616851	G	C	-11.4325	6.02754	0.0588778	bio13	10	0.999622
10B_14616899	10B	14616899	G	C	-9.03546	6.28513	0.151647	bio13	10	0.999622
10B_14636676	10B	14636676	T	G	-12.2597	6.2766	0.0517693	bio13	10	0.999622
10B_14636682	10B	14636682	T	C	-10.1513	6.47316	0.117942	bio13	10	0.999622
10B_14637231	10B	14637231	G	C	-5.14797	8.60711	0.550243	bio13	10	0.999622
10B_14676414	10B	14676414	C	A	25.2214	17.1272	0.141963	bio13	10	0.999622
10B_14676696	10B	14676696	A	G	-0.753551	3.77579	0.841956	bio13	10	0.999622
10B_14751635	10B	14751635	A	T	-0.780342	3.80671	0.837725	bio13	10	0.999622
10B_14772892	10B	14772892	A	C	0.949213	3.80287	0.803073	bio13	10	0.999622
10B_14780805	10B	14780805	T	C	6.38282	4.61795	0.167999	bio13	10	0.999622
10B_14807019	10B	14807019	C	T	3.23945	4.62387	0.484128	bio13	10	0.999622
10B_14807035	10B	14807035	G	C	14.0827	16.6638	0.398761	bio13	10	0.999622
10B_14807331	10B	14807331	T	C	-4.65811	6.08055	0.44427	bio13	10	0.999622
10B_14815429	10B	14815429	A	G	2.12555	12.4844	0.864929	bio13	10	0.999622
10B_14816458	10B	14816458	G	C	0.0428505	5.01075	0.993183	bio13	10	0.999622
10B_14816694	10B	14816694	C	G	-5.47105	5.34675	0.307058	bio13	10	0.999622
10B_14816705	10B	14816705	C	A	-3.31888	4.44287	0.455672	bio13	10	0.999622
10B_14828223	10B	14828223	A	G	7.03421	8.50201	0.408726	bio13	10	0.999622
10B_15220627	10B	15220627	G	C	-5.1645	4.39966	0.241438	bio13	10	0.999622
10B_15433739	10B	15433739	C	A	-1.43462	8.02798	0.858298	bio13	10	0.999622
10B_15433978	10B	15433978	C	T	5.53814	8.54881	0.51762	bio13	10	0.999622
10B_15433981	10B	15433981	T	C	-0.68183	5.45425	0.900605	bio13	10	0.999622
10B_15447049	10B	15447049	C	T	5.58595	16.6532	0.737549	bio13	10	0.999622
10B_15447112	10B	15447112	C	T	-3.0169	12.3007	0.80643	bio13	10	0.999622
10B_15447381	10B	15447381	C	T	12.0603	6.66697	0.0715111	bio13	10	0.999622
10B_15447388	10B	15447388	G	T	-4.71983	8.29482	0.569798	bio13	10	0.999622
10B_15456803	10B	15456803	G	A	-3.37059	8.73854	0.699996	bio13	10	0.999622
10B_15459976	10B	15459976	G	C	-0.0727697	7.81978	0.992582	bio13	10	0.999622
10B_15529777	10B	15529777	T	C	0.353969	7.7354	0.963534	bio13	10	0.999622
10B_15618250	10B	15618250	G	C	0.353969	7.7354	0.963534	bio13	10	0.999622
10B_15628097	10B	15628097	T	C	-16.9458	7.91239	0.0330674	bio13	10	0.999622
10B_15732151	10B	15732151	T	G	3.27175	14.3423	0.819718	bio13	10	0.999622
10B_15774904	10B	15774904	C	T	4.73526	11.0636	0.668973	bio13	10	0.999622
10B_15832850	10B	15832850	T	C	13.0004	9.72907	0.182536	bio13	10	0.999622
10B_15871848	10B	15871848	C	A	-3.62579	7.14156	0.612055	bio13	10	0.999622
10B_15885134	10B	15885134	C	G	-3.07594	4.01544	0.444294	bio13	10	0.999622
10B_15885429	10B	15885429	G	A	-3.07594	4.01544	0.444294	bio13	10	0.999622
10B_15902278	10B	15902278	G	T	-3.69055	5.22462	0.480531	bio13	10	0.999622
10B_16283393	10B	16283393	G	A	-0.334925	4.08109	0.934651	bio13	10	0.999622
10B_16430944	10B	16430944	G	C	0.466737	4.04014	0.90811	bio13	10	0.999622
10B_16431233	10B	16431233	A	C	-6.10266	14.9355	0.68314	bio13	10	0.999622
10B_16656288	10B	16656288	A	G	2.67938	5.6684	0.636797	bio13	10	0.999622
10B_16978858	10B	16978858	G	A	1.55077	3.70854	0.676144	bio13	10	0.999622
10B_17622750	10B	17622750	A	G	5.94113	4.13894	0.152263	bio13	10	0.999622
10B_17640376	10B	17640376	T	C	5.57338	4.18706	0.184221	bio13	10	0.999622
10B_17651375	10B	17651375	A	G	5.57338	4.18706	0.184221	bio13	10	0.999622
10B_17686625	10B	17686625	C	T	3.82564	4.22867	0.366393	bio13	10	0.999622
10B_17881282	10B	17881282	C	A	-4.47666	4.45449	0.31576	bio13	10	0.999622
10B_18081585	10B	18081585	A	C	2.19419	8.34833	0.792872	bio13	10	0.999622
10B_18156147	10B	18156147	A	G	4.04231	3.84617	0.294151	bio13	10	0.999622
10B_18177030	10B	18177030	G	A	3.71326	3.8742	0.338643	bio13	10	0.999622
10B_18279298	10B	18279298	G	A	3.54151	4.91816	0.472061	bio13	10	0.999622
10B_18280875	10B	18280875	G	A	16.1156	11.1147	0.148176	bio13	10	0.999622
10B_18285105	10B	18285105	T	C	5.94876	5.06798	0.241458	bio13	10	0.999622
10B_18519053	10B	18519053	A	G	-0.328924	5.38309	0.95132	bio13	10	0.999622
10B_18685400	10B	18685400	C	G	-5.18281	5.66636	0.361142	bio13	10	0.999622
10B_18712279	10B	18712279	T	C	1.39781	4.53419	0.758092	bio13	10	0.999622
10B_18791488	10B	18791488	C	T	0.0573366	4.44453	0.989716	bio13	10	0.999622
10B_18835165	10B	18835165	C	T	-3.758	11.0005	0.732889	bio13	10	0.999622
10B_18846397	10B	18846397	T	C	2.39311	4.61438	0.604428	bio13	10	0.999622
10B_18915948	10B	18915948	C	T	2.39311	4.61438	0.604428	bio13	10	0.999622
10B_18918442	10B	18918442	G	C	12.0631	9.47501	0.204002	bio13	10	0.999622
10B_18964483	10B	18964483	C	A	12.0631	9.47501	0.204002	bio13	10	0.999622
10B_19058388	10B	19058388	T	C	12.0631	9.47501	0.204002	bio13	10	0.999622
10B_19058705	10B	19058705	C	T	16.2638	15.9925	0.310033	bio13	10	0.999622
10B_19111773	10B	19111773	T	C	10.5797	8.8985	0.235457	bio13	10	0.999622
10B_19112082	10B	19112082	A	T	10.5797	8.8985	0.235457	bio13	10	0.999622
10B_19124755	10B	19124755	G	T	12.8958	8.98431	0.152278	bio13	10	0.999622
10B_19460765	10B	19460765	T	G	10.5797	8.8985	0.235457	bio13	10	0.999622
10B_19460826	10B	19460826	G	A	-2.01733	4.583	0.660143	bio13	10	0.999622
10B_19460832	10B	19460832	G	A	-1.68898	4.66395	0.717519	bio13	10	0.999622
10B_19510687	10B	19510687	G	T	-1.03836	4.33482	0.810859	bio13	10	0.999622
10B_19566907	10B	19566907	G	T	-4.32006	4.29699	0.315572	bio13	10	0.999622
10B_19570575	10B	19570575	C	A	-15.9341	15.6476	0.309395	bio13	10	0.999622
10B_19570743	10B	19570743	C	T	14.64	12.4076	0.239014	bio13	10	0.999622
10B_19652729	10B	19652729	A	G	0.0620722	4.47495	0.988943	bio13	10	0.999622
10B_19652765	10B	19652765	A	G	10.4036	8.08629	0.199289	bio13	10	0.999622
10B_19692163	10B	19692163	C	T	-8.8734	10.4405	0.396095	bio13	10	0.999622
10B_19778121	10B	19778121	T	A	3.49153	3.20568	0.276999	bio13	10	0.999622
10B_19778149	10B	19778149	A	G	8.43107	12.7661	0.509514	bio13	10	0.999622
10B_19778213	10B	19778213	A	G	8.85626	13.8692	0.523624	bio13	10	0.999622
10B_19778377	10B	19778377	A	G	1.05163	11.8842	0.929549	bio13	10	0.999622
10B_19778413	10B	19778413	A	G	-8.84787	5.53395	0.110966	bio13	10	0.999622
10B_19986026	10B	19986026	C	G	14.2738	12.4343	0.251955	bio13	10	0.999622
1A_206453	1A	206453	C	A	-3.16512	10.9932	0.77362	bio13	10	0.999622
1A_225085	1A	225085	A	G	-1.33952	12.4039	0.914079	bio13	10	0.999622
1A_312539	1A	312539	A	C	-11.382	12.485	0.362719	bio13	10	0.999622
1A_345165	1A	345165	G	T	2.85869	5.1976	0.582749	bio13	10	0.999622
1A_363544	1A	363544	G	T	-2.92796	5.16024	0.570884	bio13	10	0.999622
1A_363855	1A	363855	A	C	-2.68972	5.27993	0.610851	bio13	10	0.999622
1A_410531	1A	410531	T	A	-2.52611	6.52514	0.698945	bio13	10	0.999622
1A_410547	1A	410547	G	A	-17.7055	10.9884	0.108226	bio13	10	0.999622
1A_422619	1A	422619	C	A	-1.80007	6.48172	0.781433	bio13	10	0.999622
1A_422621	1A	422621	C	A	-1.80007	6.48172	0.781433	bio13	10	0.999622
1A_423316	1A	423316	G	A	-3.32826	6.28213	0.596664	bio13	10	0.999622
1A_487593	1A	487593	C	A	-1.76978	7.86758	0.822183	bio13	10	0.999622
1A_491309	1A	491309	G	A	3.3337	7.28531	0.647595	bio13	10	0.999622
1A_540221	1A	540221	T	C	13.0516	8.68192	0.133866	bio13	10	0.999622
1A_651644	1A	651644	A	C	0.0417298	4.06529	0.991817	bio13	10	0.999622
1A_758060	1A	758060	C	G	-26.9142	20.1703	0.183155	bio13	10	0.999622
1A_878978	1A	878978	A	G	-0.535207	9.64003	0.955764	bio13	10	0.999622
1A_1005831	1A	1005831	G	A	-2.94732	6.25286	0.637747	bio13	10	0.999622
1A_1018242	1A	1018242	A	C	1.35067	6.2789	0.829833	bio13	10	0.999622
1A_1237645	1A	1237645	A	C	-17.3285	14.5101	0.233378	bio13	10	0.999622
1A_1313393	1A	1313393	A	G	6.49808	5.59536	0.246478	bio13	10	0.999622
1A_1313707	1A	1313707	A	G	6.30664	5.49917	0.252411	bio13	10	0.999622
1A_1313727	1A	1313727	G	A	6.30664	5.49917	0.252411	bio13	10	0.999622
1A_1313734	1A	1313734	C	T	6.30664	5.49917	0.252411	bio13	10	0.999622
1A_1334522	1A	1334522	A	G	4.04067	5.61836	0.472613	bio13	10	0.999622
1A_1366110	1A	1366110	T	C	1.92287	5.76602	0.739015	bio13	10	0.999622
1A_1472602	1A	1472602	G	T	-0.18973	13.3458	0.988667	bio13	10	0.999622
1A_1571587	1A	1571587	G	A	0.969586	6.56626	0.882714	bio13	10	0.999622
1A_1639354	1A	1639354	T	C	-3.03766	6.77641	0.654299	bio13	10	0.999622
1A_1736302	1A	1736302	T	A	-0.250442	3.9691	0.949733	bio13	10	0.999622
1A_1842507	1A	1842507	G	A	-1.47335	8.96776	0.869616	bio13	10	0.999622
1A_1842747	1A	1842747	T	A	2.46783	4.11553	0.549225	bio13	10	0.999622
1A_1871697	1A	1871697	A	G	-7.73348	12.4642	0.535454	bio13	10	0.999622
1A_2146617	1A	2146617	T	C	9.33045	5.19714	0.0736642	bio13	10	0.999622
1A_2159655	1A	2159655	A	G	8.91022	5.44599	0.102921	bio13	10	0.999622
1A_2175604	1A	2175604	A	C	6.914	5.30494	0.19352	bio13	10	0.999622
1A_2175631	1A	2175631	A	G	6.914	5.30494	0.19352	bio13	10	0.999622
1A_2275400	1A	2275400	A	C	7.41654	6.49961	0.254797	bio13	10	0.999622
1A_2488028	1A	2488028	G	A	4.53363	4.48389	0.31283	bio13	10	0.999622
1A_2899806	1A	2899806	A	T	-2.90995	7.76033	0.707956	bio13	10	0.999622
1A_2997179	1A	2997179	T	C	11.711	10.0324	0.244057	bio13	10	0.999622
1A_3016394	1A	3016394	A	T	21.1852	10.7649	0.0500389	bio13	10	0.999622
1A_3016427	1A	3016427	T	C	21.1852	10.7649	0.0500389	bio13	10	0.999622
1A_3016433	1A	3016433	C	G	21.1852	10.7649	0.0500389	bio13	10	0.999622
1A_3083409	1A	3083409	T	C	25.3134	14.0063	0.0717718	bio13	10	0.999622
1A_3111307	1A	3111307	A	C	4.04843	8.21832	0.622667	bio13	10	0.999622
1A_3160694	1A	3160694	G	C	28.5021	15.5076	0.0671106	bio13	10	0.999622
1A_3215237	1A	3215237	C	G	6.14652	13.882	0.658268	bio13	10	0.999622
1A_3215265	1A	3215265	C	A	-23.1853	14.4999	0.110928	bio13	10	0.999622
1A_3353606	1A	3353606	T	G	11.6821	18.3636	0.525187	bio13	10	0.999622
1A_3353880	1A	3353880	G	A	5.60848	10.9275	0.608178	bio13	10	0.999622
1A_3353901	1A	3353901	G	A	-1.70355	11.1433	0.878604	bio13	10	0.999622
1A_3353939	1A	3353939	G	A	-1.26864	11.4363	0.911749	bio13	10	0.999622
1A_3399854	1A	3399854	T	A	5.99848	7.55223	0.427702	bio13	10	0.999622
1A_3399861	1A	3399861	T	A	1.96929	13.3824	0.883114	bio13	10	0.999622
1A_3399862	1A	3399862	A	T	-7.04313	10.3857	0.498223	bio13	10	0.999622
1A_3423382	1A	3423382	C	T	-18.569	11.2405	0.0996426	bio13	10	0.999622
1A_3448380	1A	3448380	G	A	4.69232	7.21655	0.516076	bio13	10	0.999622
1A_3465857	1A	3465857	C	T	13.2609	8.18492	0.106302	bio13	10	0.999622
1A_3511480	1A	3511480	G	A	13.1669	7.33377	0.0736515	bio13	10	0.999622
1A_3558780	1A	3558780	G	C	2.03766	4.91823	0.67896	bio13	10	0.999622
1A_3558794	1A	3558794	G	A	1.91144	4.90985	0.69734	bio13	10	0.999622
1A_3558807	1A	3558807	G	T	1.91144	4.90985	0.69734	bio13	10	0.999622
1A_3558823	1A	3558823	A	G	1.52212	4.97229	0.759737	bio13	10	0.999622
1A_3558864	1A	3558864	C	T	3.89773	8.75274	0.65643	bio13	10	0.999622
1A_3570580	1A	3570580	A	T	-0.789592	4.79241	0.869251	bio13	10	0.999622
1A_3570581	1A	3570581	A	T	-0.789592	4.79241	0.869251	bio13	10	0.999622
1A_3603677	1A	3603677	G	T	1.17451	4.60483	0.79886	bio13	10	0.999622
1A_3725246	1A	3725246	T	C	7.3102	4.69588	0.120645	bio13	10	0.999622
1A_3725309	1A	3725309	A	G	7.44933	4.71757	0.115431	bio13	10	0.999622
1A_3798904	1A	3798904	G	A	-5.20233	4.48026	0.246545	bio13	10	0.999622
1A_3803579	1A	3803579	A	G	-10.595	4.50579	0.0193827	bio13	10	0.999622
1A_3803611	1A	3803611	C	T	-10.6844	4.51588	0.018653	bio13	10	0.999622
1A_3922951	1A	3922951	C	A	1.78425	7.41107	0.809919	bio13	10	0.999622
1A_3922968	1A	3922968	C	T	-19.9655	7.86028	0.0116145	bio13	10	0.999622
1A_3923243	1A	3923243	C	T	-8.33677	5.47187	0.128725	bio13	10	0.999622
1A_4003990	1A	4003990	A	T	-11.5394	7.79964	0.140118	bio13	10	0.999622
1A_4004018	1A	4004018	G	A	-11.5394	7.79964	0.140118	bio13	10	0.999622
1A_4004318	1A	4004318	T	C	-8.06129	5.75118	0.1621	bio13	10	0.999622
1A_4051387	1A	4051387	A	G	-8.35474	8.58482	0.331279	bio13	10	0.999622
1A_4105887	1A	4105887	C	G	-6.75507	7.28714	0.354719	bio13	10	0.999622
1A_4134424	1A	4134424	G	A	-3.21688	4.68711	0.493067	bio13	10	0.999622
1A_4134671	1A	4134671	C	G	-3.92393	4.63586	0.398023	bio13	10	0.999622
1A_4355005	1A	4355005	G	A	0.397725	6.58961	0.951914	bio13	10	0.999622
1A_4416297	1A	4416297	A	G	-2.41004	15.1432	0.873664	bio13	10	0.999622
1A_4416317	1A	4416317	T	C	4.43479	14.3256	0.757113	bio13	10	0.999622
1A_4428017	1A	4428017	G	T	-2.12475	12.4177	0.864262	bio13	10	0.999622
1A_4548101	1A	4548101	A	G	8.86131	7.98194	0.267862	bio13	10	0.999622
1A_4636171	1A	4636171	G	A	26.7069	8.84582	0.00276426	bio13	10	0.999622
1A_4681482	1A	4681482	A	G	21.0588	10.8442	0.0531284	bio13	10	0.999622
1A_4681799	1A	4681799	A	G	20.7404	10.604	0.051454	bio13	10	0.999622
1A_4709350	1A	4709350	A	G	16.3303	10.2265	0.111406	bio13	10	0.999622
1A_4777007	1A	4777007	T	G	16.6476	10.4155	0.111072	bio13	10	0.999622
1A_4908197	1A	4908197	C	T	14.511	10.6474	0.174	bio13	10	0.999622
1A_5029350	1A	5029350	G	A	-11.6362	9.47277	0.220316	bio13	10	0.999622
1A_5257448	1A	5257448	C	A	-10.8273	11.5058	0.347488	bio13	10	0.999622
1A_5257494	1A	5257494	C	T	-2.89421	6.43571	0.65326	bio13	10	0.999622
1A_5430659	1A	5430659	C	T	9.15185	6.55808	0.163949	bio13	10	0.999622
1A_5431042	1A	5431042	C	T	-7.75889	7.97763	0.331586	bio13	10	0.999622
1A_5435570	1A	5435570	A	G	-8.63385	7.7435	0.265798	bio13	10	0.999622
1A_5550826	1A	5550826	C	T	-0.841462	5.30317	0.87404	bio13	10	0.999622
1A_5578989	1A	5578989	G	A	3.11843	14.4806	0.829647	bio13	10	0.999622
1A_5609393	1A	5609393	C	T	-5.6551	6.68326	0.398174	bio13	10	0.999622
1A_5609429	1A	5609429	G	A	-5.01185	6.53303	0.443624	bio13	10	0.999622
1A_5719547	1A	5719547	G	A	4.92231	4.77208	0.303189	bio13	10	0.999622
1A_5894207	1A	5894207	G	A	-0.993812	12.1012	0.934605	bio13	10	0.999622
1A_5963596	1A	5963596	G	C	-3.02009	5.49967	0.583339	bio13	10	0.999622
1A_6343839	1A	6343839	G	A	-10.1634	5.95994	0.0892317	bio13	10	0.999622
1A_6357134	1A	6357134	C	A	-20.6209	10.1359	0.0428335	bio13	10	0.999622
1A_6357413	1A	6357413	T	C	-8.50352	6.00195	0.157636	bio13	10	0.999622
1A_6357496	1A	6357496	T	A	-8.27422	6.08171	0.174744	bio13	10	0.999622
1A_6674932	1A	6674932	T	C	-1.01836	5.15262	0.843468	bio13	10	0.999622
1A_6674978	1A	6674978	A	C	-1.01836	5.15262	0.843468	bio13	10	0.999622
1A_6675261	1A	6675261	C	T	-1.01836	5.15262	0.843468	bio13	10	0.999622
1A_6783830	1A	6783830	A	G	8.85527	7.54088	0.241254	bio13	10	0.999622
1A_6933328	1A	6933328	G	A	-1.03016	14.3849	0.942959	bio13	10	0.999622
1A_6964065	1A	6964065	G	A	16.2519	12.0973	0.180199	bio13	10	0.999622
1A_7034944	1A	7034944	A	G	8.64194	7.27088	0.235599	bio13	10	0.999622
1A_7064740	1A	7064740	T	G	5.99528	7.76036	0.440428	bio13	10	0.999622
1A_7181856	1A	7181856	G	T	1.29938	5.04352	0.796876	bio13	10	0.999622
1A_7182127	1A	7182127	G	T	-3.91901	15.4692	0.800186	bio13	10	0.999622
1A_7189994	1A	7189994	A	G	-3.91901	15.4692	0.800186	bio13	10	0.999622
1A_7217388	1A	7217388	G	C	-2.59528	5.00146	0.604229	bio13	10	0.999622
1A_7217683	1A	7217683	T	C	-2.02635	5.0764	0.690067	bio13	10	0.999622
1A_7229348	1A	7229348	T	C	-3.3344	5.05051	0.509653	bio13	10	0.999622
1A_7254566	1A	7254566	A	C	2.3822	5.93597	0.688489	bio13	10	0.999622
1A_7464167	1A	7464167	A	G	14.4655	44.4108	0.744875	bio13	10	0.999622
1A_7464548	1A	7464548	C	T	7.83023	5.75357	0.17461	bio13	10	0.999622
1A_7501810	1A	7501810	C	T	-2.73686	6.4043	0.669449	bio13	10	0.999622
1A_7501812	1A	7501812	C	G	-2.73686	6.4043	0.669449	bio13	10	0.999622
1A_7502865	1A	7502865	T	G	1.99278	9.2374	0.829353	bio13	10	0.999622
1A_7503870	1A	7503870	C	G	4.8802	9.96061	0.624546	bio13	10	0.999622
1A_7503911	1A	7503911	T	C	4.8802	9.96061	0.624546	bio13	10	0.999622
1A_7505424	1A	7505424	A	G	-6.30924	6.05142	0.298015	bio13	10	0.999622
1A_7679151	1A	7679151	C	T	-0.552749	4.74828	0.907409	bio13	10	0.999622
1A_7848939	1A	7848939	C	G	0.221412	31.3047	0.994362	bio13	10	0.999622
1A_7849237	1A	7849237	C	T	-4.58085	4.82519	0.343242	bio13	10	0.999622
1A_7849271	1A	7849271	C	T	-4.73932	4.5006	0.293213	bio13	10	0.999622
1A_7849275	1A	7849275	G	T	-6.2819	3.73112	0.0933444	bio13	10	0.999622
1A_7849281	1A	7849281	C	T	-4.58085	4.82519	0.343242	bio13	10	0.999622
1A_7849288	1A	7849288	A	G	-4.58085	4.82519	0.343242	bio13	10	0.999622
1A_7849822	1A	7849822	C	G	-2.96079	3.71796	0.426493	bio13	10	0.999622
1A_7922766	1A	7922766	A	G	-12.8235	5.89909	0.0305427	bio13	10	0.999622
1A_7935342	1A	7935342	C	G	-13.2884	5.31047	0.0128989	bio13	10	0.999622
1A_7985553	1A	7985553	C	G	19.5113	12.0556	0.106674	bio13	10	0.999622
1A_7986463	1A	7986463	G	A	-4.59727	4.72635	0.331532	bio13	10	0.999622
1A_7992325	1A	7992325	T	C	-5.38084	4.59937	0.243015	bio13	10	0.999622
1A_7992601	1A	7992601	C	T	-8.97103	14.4129	0.534157	bio13	10	0.999622
1A_8000520	1A	8000520	G	A	-2.87265	4.74055	0.545015	bio13	10	0.999622
1A_8024135	1A	8024135	G	A	-10.1752	6.08446	0.0955574	bio13	10	0.999622
1A_8024145	1A	8024145	G	A	4.72666	5.68892	0.406752	bio13	10	0.999622
1A_8024168	1A	8024168	G	A	-10.1752	6.08446	0.0955574	bio13	10	0.999622
1A_8110235	1A	8110235	A	G	9.49761	4.35216	0.0299058	bio13	10	0.999622
1A_8110299	1A	8110299	A	G	9.0065	4.44984	0.0439021	bio13	10	0.999622
1A_8184937	1A	8184937	A	G	1.81029	8.13279	0.824013	bio13	10	0.999622
1A_8235803	1A	8235803	T	C	-4.19119	5.16629	0.417895	bio13	10	0.999622
1A_8245073	1A	8245073	T	C	0.208378	6.47004	0.97433	bio13	10	0.999622
1A_8278191	1A	8278191	G	T	3.68999	4.1229	0.371543	bio13	10	0.999622
1A_8295692	1A	8295692	T	C	2.79587	4.21399	0.507563	bio13	10	0.999622
1A_8338612	1A	8338612	A	G	2.14442	4.21277	0.611127	bio13	10	0.999622
1A_8338873	1A	8338873	G	A	-4.50015	12.7497	0.724378	bio13	10	0.999622
1A_8551322	1A	8551322	T	C	7.80697	5.62213	0.166034	bio13	10	0.999622
1A_8614515	1A	8614515	G	T	-17.533	4.13436	2.08e-06	bio13	10	0.00840251
1A_8619792	1A	8619792	G	A	10.353	6.92026	0.135747	bio13	10	0.999622
1A_8627564	1A	8627564	C	T	11.1763	6.75153	0.0989498	bio13	10	0.999622
1A_8633846	1A	8633846	G	A	12.6589	7.06102	0.0740678	bio13	10	0.999622
1A_8676686	1A	8676686	T	G	0.369336	5.82709	0.949506	bio13	10	0.999622
1A_8694136	1A	8694136	C	T	1.20408	5.48152	0.826292	bio13	10	0.999622
1A_8716146	1A	8716146	G	T	8.4512	5.18029	0.103908	bio13	10	0.999622
1A_8735022	1A	8735022	A	G	4.78165	5.40403	0.376994	bio13	10	0.999622
1A_8757375	1A	8757375	T	A	5.71118	13.6378	0.675696	bio13	10	0.999622
1A_8757406	1A	8757406	A	G	-1.67251	4.04383	0.679481	bio13	10	0.999622
1A_8789260	1A	8789260	C	T	5.09777	11.8599	0.667641	bio13	10	0.999622
1A_8898413	1A	8898413	C	T	-7.97595	4.72845	0.0927363	bio13	10	0.999622
1A_8905184	1A	8905184	C	T	-1.9528	4.82068	0.685716	bio13	10	0.999622
1A_8905252	1A	8905252	G	A	-7.6476	4.76458	0.109581	bio13	10	0.999622
1A_8905493	1A	8905493	C	T	-6.5143	4.76623	0.172777	bio13	10	0.999622
1A_8908387	1A	8908387	T	A	-3.44037	3.68198	0.350898	bio13	10	0.999622
1A_8910528	1A	8910528	A	C	2.43561	4.73892	0.607679	bio13	10	0.999622
1A_8973741	1A	8973741	A	G	0.400218	4.90649	0.935047	bio13	10	0.999622
1A_8994843	1A	8994843	G	A	26.2046	12.203	0.0326048	bio13	10	0.999622
1A_9053953	1A	9053953	A	G	1.68334	4.62655	0.716244	bio13	10	0.999622
1A_9053964	1A	9053964	C	G	1.68334	4.62655	0.716244	bio13	10	0.999622
1A_9053978	1A	9053978	T	G	2.96067	4.61746	0.521915	bio13	10	0.999622
1A_9054213	1A	9054213	C	G	4.3052	4.58981	0.349044	bio13	10	0.999622
1A_9054223	1A	9054223	G	T	4.3052	4.58981	0.349044	bio13	10	0.999622
1A_9054251	1A	9054251	C	T	4.3052	4.58981	0.349044	bio13	10	0.999622
1A_9054277	1A	9054277	A	C	4.3052	4.58981	0.349044	bio13	10	0.999622
1A_9131888	1A	9131888	G	C	17.431	9.43996	0.0658549	bio13	10	0.999622
1A_9132150	1A	9132150	C	T	17.431	9.43996	0.0658549	bio13	10	0.999622
1A_9142039	1A	9142039	C	T	23.1443	9.50808	0.01554	bio13	10	0.999622
1A_9142373	1A	9142373	G	C	23.1443	9.50808	0.01554	bio13	10	0.999622
1A_9164499	1A	9164499	G	A	14.8616	9.22506	0.108286	bio13	10	0.999622
1A_9175436	1A	9175436	T	G	-0.52814	5.47197	0.923178	bio13	10	0.999622
1A_9197750	1A	9197750	G	A	9.8276	7.73098	0.204695	bio13	10	0.999622
1A_9642540	1A	9642540	A	G	-2.42468	9.17959	0.791865	bio13	10	0.999622
1A_9939212	1A	9939212	G	A	0.0121782	10.893	0.999109	bio13	10	0.999895
1A_10009406	1A	10009406	C	T	12.8097	12.9142	0.322084	bio13	10	0.999622
1A_10009427	1A	10009427	A	G	-0.702702	10.1334	0.944763	bio13	10	0.999622
1A_10009475	1A	10009475	C	T	19.8594	8.61379	0.0218546	bio13	10	0.999622
1A_10089396	1A	10089396	C	G	10.9053	9.01791	0.227554	bio13	10	0.999622
1A_10171346	1A	10171346	C	A	1.99997	10.3961	0.847585	bio13	10	0.999622
1A_10179062	1A	10179062	C	A	3.94856	10.2442	0.700195	bio13	10	0.999622
1A_10179348	1A	10179348	T	G	3.94856	10.2442	0.700195	bio13	10	0.999622
1A_10343344	1A	10343344	C	T	-6.3458	12.198	0.603306	bio13	10	0.999622
1A_10345173	1A	10345173	T	C	-0.629075	11.0184	0.954511	bio13	10	0.999622
1A_10580011	1A	10580011	C	A	-4.74055	12.5379	0.70564	bio13	10	0.999622
1A_10580429	1A	10580429	G	A	-1.26718	11.6687	0.913599	bio13	10	0.999622
1A_10756439	1A	10756439	G	T	13.9821	12.1134	0.24936	bio13	10	0.999622
1A_10870865	1A	10870865	C	G	13.9821	12.1134	0.24936	bio13	10	0.999622
1A_10870904	1A	10870904	G	A	13.9821	12.1134	0.24936	bio13	10	0.999622
1A_10870918	1A	10870918	T	C	13.9821	12.1134	0.24936	bio13	10	0.999622
1A_10871188	1A	10871188	C	A	13.9821	12.1134	0.24936	bio13	10	0.999622
1A_10874875	1A	10874875	C	T	-10.1296	14.2633	0.478172	bio13	10	0.999622
1A_11029367	1A	11029367	T	G	15.6954	7.12229	0.0283447	bio13	10	0.999622
1A_11178504	1A	11178504	T	C	3.71633	8.27031	0.653515	bio13	10	0.999622
1A_11485272	1A	11485272	A	G	17.0027	12.4401	0.172777	bio13	10	0.999622
1A_11550037	1A	11550037	A	T	-13.8304	15.4611	0.371794	bio13	10	0.999622
1A_11712343	1A	11712343	C	T	-4.75471	7.44304	0.523457	bio13	10	0.999622
1A_11713649	1A	11713649	T	C	-7.66157	8.78332	0.383786	bio13	10	0.999622
1A_11799183	1A	11799183	G	A	-13.9294	15.3471	0.364843	bio13	10	0.999622
1A_11822650	1A	11822650	T	C	-0.674974	3.67414	0.854372	bio13	10	0.999622
1A_11879746	1A	11879746	T	G	4.17931	7.2793	0.566329	bio13	10	0.999622
1A_11917373	1A	11917373	T	C	8.48555	7.12941	0.234951	bio13	10	0.999622
1A_11917394	1A	11917394	G	C	8.48555	7.12941	0.234951	bio13	10	0.999622
1A_11917395	1A	11917395	C	A	8.48555	7.12941	0.234951	bio13	10	0.999622
1A_11943816	1A	11943816	C	T	6.48868	6.87653	0.346175	bio13	10	0.999622
1A_11979139	1A	11979139	C	A	-8.42097	5.41131	0.120775	bio13	10	0.999622
1A_12352457	1A	12352457	C	T	-24.385	13.6057	0.0741502	bio13	10	0.999622
1A_12422690	1A	12422690	G	T	1.39622	5.22184	0.789369	bio13	10	0.999622
1A_12422951	1A	12422951	A	G	1.57851	5.13048	0.758556	bio13	10	0.999622
1A_12670631	1A	12670631	G	A	6.99389	14.213	0.623043	bio13	10	0.999622
1A_12791153	1A	12791153	G	A	-6.06985	13.3115	0.648748	bio13	10	0.999622
1A_13052933	1A	13052933	C	T	-6.36392	4.561	0.164015	bio13	10	0.999622
1A_13112195	1A	13112195	C	T	-4.41206	6.12868	0.472174	bio13	10	0.999622
1A_13112197	1A	13112197	T	C	-4.41206	6.12868	0.472174	bio13	10	0.999622
1A_13130480	1A	13130480	A	G	-6.7965	6.62848	0.306068	bio13	10	0.999622
1A_13136965	1A	13136965	T	C	-6.22386	6.59022	0.345761	bio13	10	0.999622
1A_13165506	1A	13165506	G	A	-6.53184	7.55141	0.387776	bio13	10	0.999622
1A_13182280	1A	13182280	C	T	-5.44772	6.66885	0.414673	bio13	10	0.999622
1A_13182306	1A	13182306	C	T	-7.04183	7.1978	0.328741	bio13	10	0.999622
1A_13182556	1A	13182556	C	T	-5.44772	6.66885	0.414673	bio13	10	0.999622
1A_13182575	1A	13182575	A	G	-5.44772	6.66885	0.414673	bio13	10	0.999622
1A_13212988	1A	13212988	T	G	-6.31743	8.40102	0.452681	bio13	10	0.999622
1A_13252690	1A	13252690	A	T	-5.76442	11.7858	0.625147	bio13	10	0.999622
1A_13252696	1A	13252696	G	A	-5.76442	11.7858	0.625147	bio13	10	0.999622
1A_13252706	1A	13252706	A	T	-12.2352	12.7274	0.337203	bio13	10	0.999622
1A_13252739	1A	13252739	C	G	-9.09841	11.687	0.436916	bio13	10	0.999622
1A_13252918	1A	13252918	G	A	9.8228	13.8741	0.479526	bio13	10	0.999622
1A_13252927	1A	13252927	C	T	-12.2837	15.1565	0.418351	bio13	10	0.999622
1A_13252942	1A	13252942	T	C	-0.246645	10.1176	0.980568	bio13	10	0.999622
1A_13252972	1A	13252972	C	G	-12.2352	12.7274	0.337203	bio13	10	0.999622
1A_13252979	1A	13252979	C	A	-3.55952	11.4306	0.755723	bio13	10	0.999622
1A_13253374	1A	13253374	T	C	-8.50432	10.4105	0.414669	bio13	10	0.999622
1A_13257694	1A	13257694	C	T	-5.8339	10.8263	0.590403	bio13	10	0.999622
1A_13298734	1A	13298734	G	A	-6.39561	10.2915	0.534803	bio13	10	0.999622
1A_13298990	1A	13298990	A	G	-6.39561	10.2915	0.534803	bio13	10	0.999622
1A_13345053	1A	13345053	T	C	-0.685299	11.4441	0.952291	bio13	10	0.999622
1A_13345065	1A	13345065	T	C	-0.685299	11.4441	0.952291	bio13	10	0.999622
1A_13345289	1A	13345289	G	A	-7.93406	5.55176	0.154069	bio13	10	0.999622
1A_13407096	1A	13407096	A	G	-8.38054	5.92408	0.158261	bio13	10	0.999622
1A_13407114	1A	13407114	G	A	-8.38054	5.92408	0.158261	bio13	10	0.999622
1A_13407158	1A	13407158	C	T	4.00467	12.7002	0.752746	bio13	10	0.999622
1A_13407825	1A	13407825	C	A	-2.4665	5.49923	0.654121	bio13	10	0.999622
1A_13457208	1A	13457208	T	G	2.14345	3.64245	0.556686	bio13	10	0.999622
1A_13476793	1A	13476793	T	C	-0.967938	4.70018	0.836987	bio13	10	0.999622
1A_13476801	1A	13476801	G	A	4.01326	6.72467	0.551116	bio13	10	0.999622
1A_13496950	1A	13496950	A	G	5.60384	6.85244	0.414161	bio13	10	0.999622
1A_13731152	1A	13731152	C	T	1.29807	13.8902	0.92561	bio13	10	0.999622
1A_13802751	1A	13802751	T	C	-0.199974	4.43433	0.964062	bio13	10	0.999622
1A_13802796	1A	13802796	T	C	-0.68569	4.71416	0.884456	bio13	10	0.999622
1A_13802833	1A	13802833	G	T	-1.08798	4.63286	0.814501	bio13	10	0.999622
1A_13803056	1A	13803056	G	A	-0.820851	4.80052	0.864351	bio13	10	0.999622
1A_13807901	1A	13807901	G	T	-1.99713	4.7944	0.677318	bio13	10	0.999622
1A_13820968	1A	13820968	A	G	-1.02302	4.61893	0.824874	bio13	10	0.999622
1A_13834243	1A	13834243	T	G	-2.25705	4.66894	0.629169	bio13	10	0.999622
1A_13905019	1A	13905019	G	T	-3.98085	10.3582	0.70103	bio13	10	0.999622
1A_13905324	1A	13905324	T	C	-3.98085	10.3582	0.70103	bio13	10	0.999622
1A_13905381	1A	13905381	C	T	-6.62745	11.7078	0.57179	bio13	10	0.999622
1A_14100650	1A	14100650	G	C	-9.83732	4.43891	0.0274706	bio13	10	0.999622
1A_14100686	1A	14100686	C	T	-9.83732	4.43891	0.0274706	bio13	10	0.999622
1A_14100696	1A	14100696	A	G	-9.83732	4.43891	0.0274706	bio13	10	0.999622
1A_14108350	1A	14108350	G	A	-11.8956	4.64834	0.0110105	bio13	10	0.999622
1A_14313917	1A	14313917	C	T	0.750658	11.2357	0.94678	bio13	10	0.999622
1A_14555580	1A	14555580	T	C	-3.00135	4.08374	0.462974	bio13	10	0.999622
1A_14669116	1A	14669116	T	C	-1.4067	3.63845	0.699325	bio13	10	0.999622
1A_14669130	1A	14669130	G	A	-0.727044	6.06477	0.904663	bio13	10	0.999622
1A_14767719	1A	14767719	G	A	-3.66523	13.2086	0.781606	bio13	10	0.999622
1A_14987733	1A	14987733	C	T	-8.35842	12.1964	0.493701	bio13	10	0.999622
1A_14987941	1A	14987941	C	A	-8.35842	12.1964	0.493701	bio13	10	0.999622
1A_15244490	1A	15244490	A	G	0.865851	3.30041	0.793244	bio13	10	0.999622
1A_15259968	1A	15259968	G	A	-2.31096	13.7695	0.866834	bio13	10	0.999622
1A_15571011	1A	15571011	G	A	-14.1763	21.3694	0.507616	bio13	10	0.999622
1A_15958385	1A	15958385	A	T	12.658	8.67138	0.145462	bio13	10	0.999622
1A_15958668	1A	15958668	T	G	12.658	8.67138	0.145462	bio13	10	0.999622
1A_16102662	1A	16102662	C	A	13.5126	9.10281	0.138795	bio13	10	0.999622
1A_16102700	1A	16102700	T	C	13.5126	9.10281	0.138795	bio13	10	0.999622
1A_16102964	1A	16102964	G	A	13.5126	9.10281	0.138795	bio13	10	0.999622
1A_16128407	1A	16128407	T	C	13.5126	9.10281	0.138795	bio13	10	0.999622
1A_16128721	1A	16128721	A	G	13.5126	9.10281	0.138795	bio13	10	0.999622
1A_16133140	1A	16133140	A	G	9.4619	9.44329	0.317208	bio13	10	0.999622
1A_16133160	1A	16133160	T	C	9.4619	9.44329	0.317208	bio13	10	0.999622
1A_16133162	1A	16133162	G	T	9.4619	9.44329	0.317208	bio13	10	0.999622
1A_16133187	1A	16133187	T	C	9.4619	9.44329	0.317208	bio13	10	0.999622
1A_16220532	1A	16220532	G	C	12.658	8.67138	0.145462	bio13	10	0.999622
1A_17635731	1A	17635731	G	A	-7.82698	17.6215	0.657254	bio13	10	0.999622
1A_17770210	1A	17770210	C	G	-3.59886	7.03034	0.609114	bio13	10	0.999622
1A_17945353	1A	17945353	C	T	6.06085	7.50667	0.420113	bio13	10	0.999622
1A_17952650	1A	17952650	G	A	5.73297	6.529	0.380641	bio13	10	0.999622
1A_17952996	1A	17952996	A	G	2.94831	4.82542	0.541689	bio13	10	0.999622
1A_17955228	1A	17955228	C	T	-1.903	5.49292	0.729263	bio13	10	0.999622
1A_17979910	1A	17979910	G	C	1.18621	13.5713	0.93041	bio13	10	0.999622
1A_18034658	1A	18034658	G	C	-0.805684	3.52561	0.819403	bio13	10	0.999622
1A_18034662	1A	18034662	A	G	-0.319139	3.44443	0.926244	bio13	10	0.999622
1A_18218232	1A	18218232	T	A	3.02298	6.05053	0.617726	bio13	10	0.999622
1A_18223870	1A	18223870	A	G	-6.50971	7.98265	0.415477	bio13	10	0.999622
1A_18574813	1A	18574813	A	T	-8.35334	3.5118	0.0180352	bio13	10	0.999622
1A_18574820	1A	18574820	T	C	-8.35334	3.5118	0.0180352	bio13	10	0.999622
1A_18677529	1A	18677529	G	A	9.25794	10.829	0.393315	bio13	10	0.999622
1A_18753106	1A	18753106	A	T	1.1062	3.59792	0.758721	bio13	10	0.999622
1A_18753313	1A	18753313	A	T	0.846746	3.59938	0.814185	bio13	10	0.999622
1A_19277238	1A	19277238	G	A	6.6567	12.3728	0.590988	bio13	10	0.999622
1A_19569402	1A	19569402	G	A	9.3133	7.20652	0.197285	bio13	10	0.999622
1A_19569418	1A	19569418	A	G	9.3133	7.20652	0.197285	bio13	10	0.999622
1A_19569442	1A	19569442	G	A	13.9228	10.6295	0.191309	bio13	10	0.999622
1A_19569446	1A	19569446	G	A	9.3133	7.20652	0.197285	bio13	10	0.999622
1A_19621935	1A	19621935	T	C	-8.71222	10.337	0.400035	bio13	10	0.999622
1A_19627537	1A	19627537	T	C	0.655506	4.29359	0.878766	bio13	10	0.999622
1A_19640676	1A	19640676	G	A	1.24872	4.3476	0.774151	bio13	10	0.999622
1A_19679188	1A	19679188	C	A	-1.14205	5.92587	0.847314	bio13	10	0.999622
1A_19724818	1A	19724818	T	C	8.85339	4.0895	0.0312246	bio13	10	0.999622
1A_19841747	1A	19841747	G	A	0.839094	4.58066	0.854786	bio13	10	0.999622
1A_19904776	1A	19904776	T	G	4.91201	5.3257	0.35714	bio13	10	0.999622
1A_19904803	1A	19904803	C	T	4.91201	5.3257	0.35714	bio13	10	0.999622
1A_19917637	1A	19917637	A	G	-1.13176	5.61842	0.8405	bio13	10	0.999622
1A_20008420	1A	20008420	G	A	-3.81461	5.53163	0.491007	bio13	10	0.999622
1A_20008464	1A	20008464	C	T	-3.81461	5.53163	0.491007	bio13	10	0.999622
1A_20008726	1A	20008726	T	C	-3.81461	5.53163	0.491007	bio13	10	0.999622
1A_20008765	1A	20008765	G	A	0.376511	11.7862	0.974538	bio13	10	0.999622
1A_20031111	1A	20031111	G	A	4.40003	5.65202	0.436928	bio13	10	0.999622
1A_20042711	1A	20042711	C	T	0.705073	5.82494	0.903742	bio13	10	0.999622
1A_20081795	1A	20081795	T	G	26.1341	15.3921	0.0906199	bio13	10	0.999622
1A_20081801	1A	20081801	G	A	3.49597	5.63005	0.53513	bio13	10	0.999622
1A_20230248	1A	20230248	T	C	7.20277	5.68134	0.205906	bio13	10	0.999622
1A_20230521	1A	20230521	T	A	7.32271	5.58297	0.190706	bio13	10	0.999622
1A_20363229	1A	20363229	T	C	-8.55385	5.25795	0.104876	bio13	10	0.999622
1A_20432942	1A	20432942	G	C	-5.89998	22.0148	0.788892	bio13	10	0.999622
1A_20432974	1A	20432974	A	C	12.5166	6.87866	0.0698643	bio13	10	0.999622
1A_20447886	1A	20447886	C	T	-8.086	5.06691	0.111632	bio13	10	0.999622
1A_20447895	1A	20447895	C	T	-9.94983	10.509	0.344549	bio13	10	0.999622
1A_20456628	1A	20456628	C	T	-1.46677	5.73118	0.798191	bio13	10	0.999622
1A_20456827	1A	20456827	T	C	0.470057	5.92841	0.936859	bio13	10	0.999622
1A_20456828	1A	20456828	A	C	0.470057	5.92841	0.936859	bio13	10	0.999622
1A_20456832	1A	20456832	C	A	-6.98618	17.6118	0.691902	bio13	10	0.999622
1A_20457186	1A	20457186	C	G	12.6934	6.66275	0.0577707	bio13	10	0.999622
1A_20475041	1A	20475041	A	T	-7.32279	5.10454	0.152507	bio13	10	0.999622
1A_20475108	1A	20475108	C	T	1.28543	12.9933	0.921263	bio13	10	0.999622
1A_20475113	1A	20475113	T	C	1.35207	5.92512	0.819659	bio13	10	0.999622
1A_20475336	1A	20475336	G	A	16.0049	10.156	0.116155	bio13	10	0.999622
1A_20488961	1A	20488961	G	C	12.7548	6.82284	0.0625895	bio13	10	0.999622
1A_20554838	1A	20554838	G	A	-7.09053	5.21305	0.174857	bio13	10	0.999622
1A_20554852	1A	20554852	A	G	-18.8792	7.21738	0.00937608	bio13	10	0.999622
1A_20609897	1A	20609897	A	G	-1.01174	5.77988	0.861169	bio13	10	0.999622
1A_20610154	1A	20610154	C	T	14.2032	7.12958	0.0473082	bio13	10	0.999622
1A_20610161	1A	20610161	C	A	14.2032	7.12958	0.0473082	bio13	10	0.999622
1A_20610219	1A	20610219	G	C	14.2032	7.12958	0.0473082	bio13	10	0.999622
1A_20610231	1A	20610231	T	C	-0.329689	5.74447	0.954273	bio13	10	0.999622
1A_20610583	1A	20610583	C	G	12.7965	6.75373	0.0591401	bio13	10	0.999622
1A_20610620	1A	20610620	G	A	12.7965	6.75373	0.0591401	bio13	10	0.999622
1A_20610908	1A	20610908	G	A	-2.57556	5.10061	0.613983	bio13	10	0.999622
1A_20611102	1A	20611102	T	C	12.3176	6.96427	0.0780156	bio13	10	0.999622
1A_20620728	1A	20620728	G	C	0.791229	5.73831	0.890428	bio13	10	0.999622
1A_20646446	1A	20646446	T	C	-0.177577	5.78877	0.975549	bio13	10	0.999622
1A_20646484	1A	20646484	A	G	10.8847	6.90286	0.115942	bio13	10	0.999622
1A_20646798	1A	20646798	A	C	2.61549	5.6549	0.644064	bio13	10	0.999622
1A_20646821	1A	20646821	A	G	-1.31225	5.86712	0.823181	bio13	10	0.999622
1A_20646867	1A	20646867	T	C	11.2484	6.88064	0.103197	bio13	10	0.999622
1A_20678463	1A	20678463	G	A	9.36469	7.41903	0.20789	bio13	10	0.999622
1A_20678758	1A	20678758	C	T	8.99627	7.47332	0.229672	bio13	10	0.999622
1A_20706989	1A	20706989	T	C	11.2157	6.31126	0.0766183	bio13	10	0.999622
1A_20707034	1A	20707034	A	T	11.2157	6.31126	0.0766183	bio13	10	0.999622
1A_20707324	1A	20707324	G	T	9.76675	6.37188	0.126437	bio13	10	0.999622
1A_20707678	1A	20707678	T	C	9.76675	6.37188	0.126437	bio13	10	0.999622
1A_20707703	1A	20707703	G	A	10.2948	6.5776	0.118662	bio13	10	0.999622
1A_20727608	1A	20727608	C	T	-6.43495	5.14428	0.211999	bio13	10	0.999622
1A_20727862	1A	20727862	T	A	-4.56059	5.12391	0.374184	bio13	10	0.999622
1A_20727865	1A	20727865	A	C	-4.56059	5.12391	0.374184	bio13	10	0.999622
1A_20753458	1A	20753458	C	T	-6.98618	17.6118	0.691902	bio13	10	0.999622
1A_20753790	1A	20753790	T	C	11.3977	7.08296	0.108686	bio13	10	0.999622
1A_20753899	1A	20753899	A	T	-6.16387	5.30613	0.246349	bio13	10	0.999622
1A_20757732	1A	20757732	G	A	10.3004	6.20257	0.0978798	bio13	10	0.999622
1A_20757736	1A	20757736	T	C	-5.58975	5.22827	0.285911	bio13	10	0.999622
1A_20757746	1A	20757746	G	C	-5.58975	5.22827	0.285911	bio13	10	0.999622
1A_20807412	1A	20807412	C	G	12.1804	6.89706	0.0784617	bio13	10	0.999622
1A_20839150	1A	20839150	T	G	-6.48219	5.20626	0.214127	bio13	10	0.999622
1A_20844357	1A	20844357	T	C	13.4586	7.17574	0.0617361	bio13	10	0.999622
1A_20844863	1A	20844863	G	T	10.9667	12.4191	0.377951	bio13	10	0.999622
1A_20845088	1A	20845088	G	A	11.0164	6.33784	0.0832575	bio13	10	0.999622
1A_20969573	1A	20969573	G	A	34.0803	13.4911	0.0120747	bio13	10	0.999622
1A_20969890	1A	20969890	G	A	0.27152	5.91929	0.963446	bio13	10	0.999622
1A_20981225	1A	20981225	T	G	1.20024	5.92016	0.839484	bio13	10	0.999622
1A_20981281	1A	20981281	G	A	-6.56883	5.18432	0.20617	bio13	10	0.999622
1A_20981367	1A	20981367	G	C	2.75276	13.2317	0.835344	bio13	10	0.999622
1A_20981370	1A	20981370	C	T	1.45851	5.85782	0.803552	bio13	10	0.999622
1A_20993155	1A	20993155	T	C	17.8679	7.86254	0.0237992	bio13	10	0.999622
1A_21034529	1A	21034529	G	A	-7.91479	5.38128	0.142448	bio13	10	0.999622
1A_21034571	1A	21034571	C	T	-7.91479	5.38128	0.142448	bio13	10	0.999622
1A_21034582	1A	21034582	C	G	-37.6663	16.7848	0.0255952	bio13	10	0.999622
1A_21034911	1A	21034911	A	G	1.39943	5.79412	0.809322	bio13	10	0.999622
1A_21035203	1A	21035203	T	G	-4.99951	5.22302	0.339275	bio13	10	0.999622
1A_21035237	1A	21035237	C	T	14.4872	10.048	0.150456	bio13	10	0.999622
1A_21053485	1A	21053485	G	A	-6.44073	5.34357	0.229079	bio13	10	0.999622
1A_21053532	1A	21053532	T	C	-5.99583	5.42958	0.270398	bio13	10	0.999622
1A_21053544	1A	21053544	A	G	1.67322	5.77172	0.772104	bio13	10	0.999622
1A_21053929	1A	21053929	A	G	-5.16893	5.18287	0.31946	bio13	10	0.999622
1A_21054173	1A	21054173	A	G	-6.87865	5.19629	0.186643	bio13	10	0.999622
1A_21054211	1A	21054211	G	A	-6.3445	5.23941	0.22693	bio13	10	0.999622
1A_21107745	1A	21107745	T	C	0.0701019	5.87084	0.990481	bio13	10	0.999622
1A_21108095	1A	21108095	T	G	-0.71576	5.14096	0.889369	bio13	10	0.999622
1A_21141343	1A	21141343	A	G	-2.11604	5.09785	0.678393	bio13	10	0.999622
1A_21141360	1A	21141360	G	A	-2.11604	5.09785	0.678393	bio13	10	0.999622
1A_21141703	1A	21141703	A	G	-2.11604	5.09785	0.678393	bio13	10	0.999622
1A_21146867	1A	21146867	A	G	-1.80426	5.04142	0.720693	bio13	10	0.999622
1A_21146900	1A	21146900	C	T	-1.80426	5.04142	0.720693	bio13	10	0.999622
1A_21147207	1A	21147207	G	A	-16.8781	12.4092	0.174865	bio13	10	0.999622
1A_21240353	1A	21240353	A	G	-1.85333	5.07827	0.715418	bio13	10	0.999622
1A_21240641	1A	21240641	T	A	-1.67979	5.02787	0.738553	bio13	10	0.999622
1A_21272867	1A	21272867	G	A	-0.662352	5.09202	0.896598	bio13	10	0.999622
1A_21272878	1A	21272878	G	A	-0.662352	5.09202	0.896598	bio13	10	0.999622
1A_21401588	1A	21401588	G	C	0.557673	4.94467	0.910282	bio13	10	0.999622
1A_21401837	1A	21401837	G	C	0.557673	4.94467	0.910282	bio13	10	0.999622
1A_21401892	1A	21401892	T	C	-0.164792	4.89303	0.973157	bio13	10	0.999622
1A_21484612	1A	21484612	C	T	16.2072	11.2756	0.151711	bio13	10	0.999622
1A_21514681	1A	21514681	A	G	9.63319	14.5355	0.508035	bio13	10	0.999622
1A_21514696	1A	21514696	C	T	-2.24377	4.9961	0.653698	bio13	10	0.999622
1A_21636197	1A	21636197	T	A	1.99059	4.92659	0.686479	bio13	10	0.999622
1A_21643507	1A	21643507	A	G	1.54933	5.02142	0.757894	bio13	10	0.999622
1A_21643508	1A	21643508	G	A	1.71517	4.91772	0.727517	bio13	10	0.999622
1A_21643514	1A	21643514	G	A	1.17118	5.03046	0.816069	bio13	10	0.999622
1A_21643515	1A	21643515	G	A	3.85632	8.54407	0.652085	bio13	10	0.999622
1A_21673392	1A	21673392	G	A	0.648085	4.97652	0.896478	bio13	10	0.999622
1A_21747728	1A	21747728	G	A	4.40845	15.3585	0.774292	bio13	10	0.999622
1A_21748015	1A	21748015	G	A	-4.73573	4.99598	0.343979	bio13	10	0.999622
1A_21748061	1A	21748061	G	A	-4.76351	4.90676	0.332468	bio13	10	0.999622
1A_21748079	1A	21748079	T	C	-4.76351	4.90676	0.332468	bio13	10	0.999622
1A_21780975	1A	21780975	C	T	9.63319	14.5355	0.508035	bio13	10	0.999622
1A_21806254	1A	21806254	T	G	-0.136303	4.96262	0.978107	bio13	10	0.999622
1A_22154291	1A	22154291	G	A	-7.32853	14.759	0.619892	bio13	10	0.999622
1A_22154329	1A	22154329	T	C	-7.32853	14.759	0.619892	bio13	10	0.999622
1A_22154332	1A	22154332	G	A	-7.32853	14.759	0.619892	bio13	10	0.999622
1A_22154582	1A	22154582	G	A	6.57062	7.9898	0.411551	bio13	10	0.999622
1A_22154628	1A	22154628	C	T	-7.32853	14.759	0.619892	bio13	10	0.999622
1A_22169627	1A	22169627	G	A	-2.95468	4.98361	0.553731	bio13	10	0.999622
1A_22169869	1A	22169869	T	C	9.63319	14.5355	0.508035	bio13	10	0.999622
1A_22169875	1A	22169875	G	A	9.63319	14.5355	0.508035	bio13	10	0.999622
1A_22169901	1A	22169901	A	G	-3.09187	4.82704	0.522341	bio13	10	0.999622
1A_22176904	1A	22176904	A	T	-2.04122	21.6033	0.924789	bio13	10	0.999622
1A_22176916	1A	22176916	G	A	12.627	13.8397	0.362343	bio13	10	0.999622
1A_22202347	1A	22202347	C	A	-0.150186	4.86229	0.97538	bio13	10	0.999622
1A_22202688	1A	22202688	C	T	-3.35892	5.06658	0.507894	bio13	10	0.999622
1A_22202744	1A	22202744	A	G	-11.8	44.0296	0.788892	bio13	10	0.999622
1A_22258079	1A	22258079	A	C	12.3924	11.6493	0.288324	bio13	10	0.999622
1A_22267805	1A	22267805	A	T	7.26862	11.7671	0.537262	bio13	10	0.999622
1A_22272489	1A	22272489	T	C	2.64409	4.7816	0.580715	bio13	10	0.999622
1A_22349993	1A	22349993	G	A	9.63319	14.5355	0.508035	bio13	10	0.999622
1A_22350287	1A	22350287	G	A	-3.9117	5.01655	0.43618	bio13	10	0.999622
1A_22354810	1A	22354810	C	G	34.0803	13.4911	0.0120747	bio13	10	0.999622
1A_22355119	1A	22355119	G	A	13.7594	14.1703	0.332374	bio13	10	0.999622
1A_22355125	1A	22355125	T	A	0.441564	5.05048	0.930391	bio13	10	0.999622
1A_22408138	1A	22408138	T	C	-0.605828	4.91715	0.90203	bio13	10	0.999622
1A_22408226	1A	22408226	C	T	-2.04122	21.6033	0.924789	bio13	10	0.999622
1A_22408412	1A	22408412	C	T	-0.678845	5.03386	0.892821	bio13	10	0.999622
1A_22692075	1A	22692075	T	C	0.0202213	4.90972	0.996717	bio13	10	0.999637
1A_22704469	1A	22704469	G	A	-3.33573	5.1495	0.517651	bio13	10	0.999622
1A_22704482	1A	22704482	C	G	-3.33573	5.1495	0.517651	bio13	10	0.999622
1A_22736504	1A	22736504	C	T	9.63319	14.5355	0.508035	bio13	10	0.999622
1A_22827509	1A	22827509	C	T	0.0080409	4.87132	0.998684	bio13	10	0.999895
1A_22854493	1A	22854493	T	C	-2.1932	5.00417	0.66152	bio13	10	0.999622
1A_22856236	1A	22856236	A	C	1.99979	5.5301	0.717904	bio13	10	0.999622
1A_23009328	1A	23009328	A	C	4.26817	4.91492	0.3859	bio13	10	0.999622
1A_23064748	1A	23064748	T	C	-7.39815	11.7502	0.52945	bio13	10	0.999622
1A_23064934	1A	23064934	C	T	-2.55249	11.358	0.82235	bio13	10	0.999622
1A_23065185	1A	23065185	T	C	2.03716	4.87262	0.676202	bio13	10	0.999622
1A_23065191	1A	23065191	C	T	-3.33471	11.0882	0.76383	bio13	10	0.999622
1A_23065222	1A	23065222	C	T	-3.33471	11.0882	0.76383	bio13	10	0.999622
1A_23077070	1A	23077070	T	C	17.5202	13.0808	0.181514	bio13	10	0.999622
1A_23113602	1A	23113602	T	A	2.27845	13.8055	0.869031	bio13	10	0.999622
1A_23297659	1A	23297659	G	A	6.13708	3.75699	0.103466	bio13	10	0.999622
1A_23297665	1A	23297665	T	C	6.13708	3.75699	0.103466	bio13	10	0.999622
1A_23307769	1A	23307769	C	A	2.4967	3.74048	0.505004	bio13	10	0.999622
1A_23321879	1A	23321879	C	T	-2.66863	3.88645	0.492863	bio13	10	0.999622
1A_23324416	1A	23324416	A	G	-4.60986	12.9225	0.721556	bio13	10	0.999622
1A_23359789	1A	23359789	C	G	9.96131	8.31447	0.231885	bio13	10	0.999622
1A_23442440	1A	23442440	T	C	-1.9589	4.19914	0.641215	bio13	10	0.999622
1A_23453718	1A	23453718	A	T	-0.651091	4.22756	0.87771	bio13	10	0.999622
1A_23453734	1A	23453734	G	C	-2.58464	5.96008	0.664865	bio13	10	0.999622
1A_23453984	1A	23453984	C	T	-0.913912	6.07374	0.880501	bio13	10	0.999622
1A_23498608	1A	23498608	G	A	0.629993	5.07808	0.901354	bio13	10	0.999622
1A_23498613	1A	23498613	C	T	4.16215	4.59273	0.365571	bio13	10	0.999622
1A_23498614	1A	23498614	C	T	-0.5921	6.53475	0.927868	bio13	10	0.999622
1A_23547166	1A	23547166	T	C	0.679663	13.0685	0.958559	bio13	10	0.999622
1A_23547185	1A	23547185	A	G	6.37772	6.12901	0.298952	bio13	10	0.999622
1A_23547213	1A	23547213	A	G	3.9727	5.3796	0.460833	bio13	10	0.999622
1A_23567979	1A	23567979	G	A	6.5516	6.21475	0.292683	bio13	10	0.999622
1A_23609557	1A	23609557	C	G	12.0937	6.42792	0.0609331	bio13	10	0.999622
1A_23613054	1A	23613054	G	C	5.29593	5.23536	0.312602	bio13	10	0.999622
1A_23613339	1A	23613339	T	C	4.53456	4.27134	0.289305	bio13	10	0.999622
1A_23662577	1A	23662577	C	T	4.08779	5.33323	0.444028	bio13	10	0.999622
1A_23666240	1A	23666240	T	G	7.77121	7.21538	0.282376	bio13	10	0.999622
1A_23730648	1A	23730648	A	T	0.374392	6.67949	0.95534	bio13	10	0.999622
1A_23730959	1A	23730959	C	T	5.41224	5.35289	0.312832	bio13	10	0.999622
1A_23731009	1A	23731009	C	T	34.0803	13.4911	0.0120747	bio13	10	0.999622
1A_23758522	1A	23758522	A	C	6.49836	4.21131	0.123923	bio13	10	0.999622
1A_23758837	1A	23758837	A	C	17.4804	15.3944	0.257117	bio13	10	0.999622
1A_23767392	1A	23767392	C	T	4.17728	7.183	0.561329	bio13	10	0.999622
1A_23767729	1A	23767729	T	G	4.37209	5.27979	0.408318	bio13	10	0.999622
1A_23795511	1A	23795511	T	G	4.4396	6.92761	0.522132	bio13	10	0.999622
1A_23819911	1A	23819911	C	T	6.39155	5.51822	0.247726	bio13	10	0.999622
1A_23819936	1A	23819936	G	T	6.39155	5.51822	0.247726	bio13	10	0.999622
1A_23820130	1A	23820130	C	T	6.39155	5.51822	0.247726	bio13	10	0.999622
1A_23820170	1A	23820170	C	G	4.41	5.41023	0.415682	bio13	10	0.999622
1A_23820245	1A	23820245	T	C	14.9189	12.0127	0.215283	bio13	10	0.999622
1A_23820300	1A	23820300	A	T	5.05352	5.05942	0.318723	bio13	10	0.999622
1A_23963081	1A	23963081	A	G	7.17425	8.10466	0.376795	bio13	10	0.999622
1A_24110475	1A	24110475	C	T	8.49409	4.27606	0.0479432	bio13	10	0.999622
1A_24125298	1A	24125298	G	A	8.35239	4.34139	0.0553631	bio13	10	0.999622
1A_24125308	1A	24125308	C	T	8.27821	4.35908	0.0585649	bio13	10	0.999622
1A_24125334	1A	24125334	G	A	8.27821	4.35908	0.0585649	bio13	10	0.999622
1A_24134477	1A	24134477	T	C	8.58668	4.249	0.0442282	bio13	10	0.999622
1A_24134497	1A	24134497	T	A	-14.4692	7.07471	0.0417534	bio13	10	0.999622
1A_24197090	1A	24197090	C	T	8.31904	4.27876	0.0528473	bio13	10	0.999622
1A_24197386	1A	24197386	C	T	-5.49007	17.9474	0.759905	bio13	10	0.999622
1A_24226846	1A	24226846	A	G	27.0758	13.1729	0.0407494	bio13	10	0.999622
1A_24239455	1A	24239455	A	C	-5.5294	4.13781	0.182513	bio13	10	0.999622
1A_24239510	1A	24239510	A	C	-5.5294	4.13781	0.182513	bio13	10	0.999622
1A_24239528	1A	24239528	T	C	-5.47504	7.94903	0.49153	bio13	10	0.999622
1A_24239750	1A	24239750	A	G	-5.5294	4.13781	0.182513	bio13	10	0.999622
1A_24247880	1A	24247880	A	T	1.69958	5.14507	0.741392	bio13	10	0.999622
1A_24247915	1A	24247915	A	C	27.0758	13.1729	0.0407494	bio13	10	0.999622
1A_24248088	1A	24248088	C	T	-5.26417	3.92648	0.181091	bio13	10	0.999622
1A_24248128	1A	24248128	A	G	27.0758	13.1729	0.0407494	bio13	10	0.999622
1A_24328597	1A	24328597	T	C	-2.68303	5.04644	0.59537	bio13	10	0.999622
1A_24328645	1A	24328645	C	T	-2.68303	5.04644	0.59537	bio13	10	0.999622
1A_24345755	1A	24345755	C	T	23.4001	13.2493	0.0784435	bio13	10	0.999622
1A_24433002	1A	24433002	A	G	28.7078	13.5966	0.0356084	bio13	10	0.999622
1A_24440379	1A	24440379	G	A	22.7815	13.0246	0.081347	bio13	10	0.999622
1A_24440390	1A	24440390	T	A	13.8203	6.05371	0.0231698	bio13	10	0.999622
1A_24440643	1A	24440643	A	T	28.7078	13.5966	0.0356084	bio13	10	0.999622
1A_24454409	1A	24454409	G	C	12.5336	6.15923	0.0427837	bio13	10	0.999622
1A_24454654	1A	24454654	A	G	-4.86746	4.97003	0.328232	bio13	10	0.999622
1A_24476364	1A	24476364	T	C	-2.87098	5.61285	0.609396	bio13	10	0.999622
1A_24476395	1A	24476395	A	G	-2.87098	5.61285	0.609396	bio13	10	0.999622
1A_24506143	1A	24506143	G	A	-1.47261	3.83323	0.701138	bio13	10	0.999622
1A_24509201	1A	24509201	A	G	-4.21129	4.99117	0.399518	bio13	10	0.999622
1A_24551788	1A	24551788	T	C	-2.79196	5.34564	0.601875	bio13	10	0.999622
1A_24551850	1A	24551850	T	C	0.614058	4.7903	0.898091	bio13	10	0.999622
1A_24551851	1A	24551851	A	T	0.614058	4.7903	0.898091	bio13	10	0.999622
1A_24690274	1A	24690274	C	A	8.38146	6.59757	0.204983	bio13	10	0.999622
1A_24729538	1A	24729538	A	C	-0.905199	3.90054	0.81665	bio13	10	0.999622
1A_24729587	1A	24729587	A	C	-2.24042	3.85868	0.561956	bio13	10	0.999622
1A_24765052	1A	24765052	G	A	17.3386	13.5126	0.200483	bio13	10	0.999622
1A_24806283	1A	24806283	A	C	-3.00753	3.84745	0.435044	bio13	10	0.999622
1A_24826707	1A	24826707	A	G	3.62012	7.43889	0.626882	bio13	10	0.999622
1A_24837062	1A	24837062	C	G	10.4613	6.41862	0.104242	bio13	10	0.999622
1A_24837089	1A	24837089	G	C	11.1828	10.4357	0.284815	bio13	10	0.999622
1A_24839776	1A	24839776	G	A	13.4929	7.16332	0.0606362	bio13	10	0.999622
1A_24846648	1A	24846648	T	G	4.57834	7.35599	0.534179	bio13	10	0.999622
1A_24846859	1A	24846859	T	C	6.65745	5.53341	0.229922	bio13	10	0.999622
1A_24942996	1A	24942996	G	T	10.4749	6.67836	0.117877	bio13	10	0.999622
1A_24994330	1A	24994330	C	T	-9.36887	9.66317	0.333096	bio13	10	0.999622
1A_25017622	1A	25017622	C	T	-8.71881	18.6975	0.641351	bio13	10	0.999622
1A_25017641	1A	25017641	G	C	-8.71881	18.6975	0.641351	bio13	10	0.999622
1A_25017973	1A	25017973	A	G	26.6791	19.2583	0.167035	bio13	10	0.999622
1A_25084727	1A	25084727	G	A	8.72395	10.31	0.398172	bio13	10	0.999622
1A_25085147	1A	25085147	C	A	1.56674	7.22063	0.828378	bio13	10	0.999622
1A_25087109	1A	25087109	C	T	-6.8674	3.92149	0.0809838	bio13	10	0.999622
1A_25096225	1A	25096225	C	A	2.65291	5.82776	0.649298	bio13	10	0.999622
1A_25110059	1A	25110059	C	A	5.93749	10.0601	0.555523	bio13	10	0.999622
1A_25154028	1A	25154028	C	T	-1.97355	5.36175	0.713087	bio13	10	0.999622
1A_25235877	1A	25235877	G	T	3.52841	12.2505	0.773541	bio13	10	0.999622
1A_25308034	1A	25308034	T	G	-0.759305	4.31896	0.86057	bio13	10	0.999622
1A_25327718	1A	25327718	T	C	8.82544	7.66484	0.250525	bio13	10	0.999622
1A_25370077	1A	25370077	G	C	11.7917	9.77177	0.228544	bio13	10	0.999622
1A_25435530	1A	25435530	C	A	-5.39124	10.79	0.617707	bio13	10	0.999622
1A_25453154	1A	25453154	T	C	-0.735504	10.5236	0.944329	bio13	10	0.999622
1A_25550500	1A	25550500	T	C	15.3018	13.5599	0.260074	bio13	10	0.999622
1A_25550769	1A	25550769	G	A	15.3018	13.5599	0.260074	bio13	10	0.999622
1A_25690092	1A	25690092	A	T	-0.352789	4.04035	0.930481	bio13	10	0.999622
1A_25690341	1A	25690341	C	T	-0.222557	3.99674	0.955632	bio13	10	0.999622
1A_26193863	1A	26193863	C	T	22.4917	10.0643	0.0262052	bio13	10	0.999622
1A_26411157	1A	26411157	A	G	5.81671	10.167	0.567696	bio13	10	0.999622
1A_26428932	1A	26428932	G	A	8.91392	9.79275	0.363456	bio13	10	0.999622
1A_26429261	1A	26429261	T	C	8.91392	9.79275	0.363456	bio13	10	0.999622
1A_26435728	1A	26435728	A	G	10.1947	9.54474	0.286383	bio13	10	0.999622
1A_26436047	1A	26436047	G	A	10.1947	9.54474	0.286383	bio13	10	0.999622
1A_26544209	1A	26544209	C	A	2.3501	3.58984	0.513219	bio13	10	0.999622
1A_26957028	1A	26957028	A	T	4.11332	4.41879	0.352709	bio13	10	0.999622
1A_27167046	1A	27167046	T	C	7.23314	8.63041	0.402677	bio13	10	0.999622
1A_27167057	1A	27167057	G	A	7.23314	8.63041	0.402677	bio13	10	0.999622
1A_27167375	1A	27167375	T	A	3.62806	7.44695	0.6265	bio13	10	0.999622
1A_27255713	1A	27255713	C	G	10.4283	7.33375	0.15613	bio13	10	0.999622
1A_27260146	1A	27260146	T	G	0.267017	10.0319	0.978784	bio13	10	0.999622
1A_27260155	1A	27260155	G	A	12.0867	7.30114	0.0989324	bio13	10	0.999622
1A_27289224	1A	27289224	C	T	14.9272	6.97678	0.0332398	bio13	10	0.999622
1A_27319041	1A	27319041	T	G	14.6214	8.91311	0.102018	bio13	10	0.999622
1A_27319102	1A	27319102	C	T	-4.39487	10.8177	0.684853	bio13	10	0.999622
1A_27512154	1A	27512154	C	T	-4.07749	9.7644	0.676563	bio13	10	0.999622
1A_27528848	1A	27528848	G	A	-3.53531	11.9968	0.768448	bio13	10	0.999622
1A_27528886	1A	27528886	G	A	-2.23658	5.02015	0.656281	bio13	10	0.999622
1A_28001851	1A	28001851	C	T	23.2025	14.6669	0.114765	bio13	10	0.999622
1A_28143215	1A	28143215	G	A	-3.99945	4.96155	0.420864	bio13	10	0.999622
1A_28143241	1A	28143241	G	A	23.2025	14.6669	0.114765	bio13	10	0.999622
1A_28231450	1A	28231450	G	A	-3.50511	4.07306	0.390204	bio13	10	0.999622
1A_28231468	1A	28231468	G	A	-3.20465	4.16273	0.44203	bio13	10	0.999622
1A_28231690	1A	28231690	C	G	-3.10593	4.15812	0.455706	bio13	10	0.999622
1A_28232170	1A	28232170	A	G	-3.19509	4.06248	0.432236	bio13	10	0.999622
1A_28240739	1A	28240739	G	C	12.9924	13.7062	0.343974	bio13	10	0.999622
1A_28240760	1A	28240760	G	A	-1.75735	4.12156	0.670153	bio13	10	0.999622
1A_28240783	1A	28240783	A	G	-2.52115	4.03168	0.532251	bio13	10	0.999622
1A_28271537	1A	28271537	T	C	-10.915	13.4903	0.419131	bio13	10	0.999622
1A_28342597	1A	28342597	C	A	-3.21423	8.05069	0.690009	bio13	10	0.999622
1A_28461621	1A	28461621	C	T	1.27274	5.0571	0.801475	bio13	10	0.999622
1A_28533242	1A	28533242	A	C	-3.23867	4.07983	0.427958	bio13	10	0.999622
1A_28541930	1A	28541930	C	G	-3.2944	4.57604	0.472162	bio13	10	0.999622
1A_28542184	1A	28542184	G	C	-4.21274	4.56894	0.357288	bio13	10	0.999622
1A_28542222	1A	28542222	A	G	-4.26212	4.5502	0.349712	bio13	10	0.999622
1A_28542232	1A	28542232	T	C	-3.35205	4.55778	0.462666	bio13	10	0.999622
1A_28542254	1A	28542254	A	G	-3.35205	4.55778	0.462666	bio13	10	0.999622
1A_28577302	1A	28577302	C	G	-3.06145	4.46912	0.493886	bio13	10	0.999622
1A_28578265	1A	28578265	A	G	-2.11353	4.59969	0.64623	bio13	10	0.999622
1A_28642637	1A	28642637	C	T	0.648836	3.69032	0.860559	bio13	10	0.999622
1A_28642845	1A	28642845	G	A	-2.68442	4.88473	0.583057	bio13	10	0.999622
1A_28667888	1A	28667888	T	C	-1.13873	3.64218	0.754774	bio13	10	0.999622
1A_28691211	1A	28691211	T	G	0.22121	4.95863	0.964449	bio13	10	0.999622
1A_28891562	1A	28891562	C	T	18.3676	15.6862	0.242601	bio13	10	0.999622
1A_29089728	1A	29089728	T	A	-2.63645	4.06155	0.516781	bio13	10	0.999622
1A_29089734	1A	29089734	A	G	-2.63645	4.06155	0.516781	bio13	10	0.999622
1A_29228750	1A	29228750	C	T	-1.28352	11.0498	0.907609	bio13	10	0.999622
1A_29228754	1A	29228754	G	T	-11.8624	7.07967	0.0949206	bio13	10	0.999622
1A_29239100	1A	29239100	A	G	-13.8421	7.43246	0.063577	bio13	10	0.999622
1A_29614893	1A	29614893	C	A	-3.35927	3.39639	0.323468	bio13	10	0.999622
1A_29614922	1A	29614922	C	T	-3.35927	3.39639	0.323468	bio13	10	0.999622
1A_29615167	1A	29615167	C	A	-3.4972	3.39842	0.304321	bio13	10	0.999622
1A_29747266	1A	29747266	G	A	-5.52483	10.424	0.596517	bio13	10	0.999622
1A_30047754	1A	30047754	T	C	1.00888	5.2233	0.846979	bio13	10	0.999622
1A_30098481	1A	30098481	T	A	6.80783	5.10128	0.183094	bio13	10	0.999622
1A_30187776	1A	30187776	G	T	0.381062	15.6749	0.980622	bio13	10	0.999622
1A_30190807	1A	30190807	G	A	-3.41321	4.6047	0.459155	bio13	10	0.999622
1A_30191091	1A	30191091	C	T	-3.72164	4.63163	0.42234	bio13	10	0.999622
1A_30291401	1A	30291401	G	A	4.50864	5.38236	0.402919	bio13	10	0.999622
1A_30291624	1A	30291624	A	T	-8.29403	13.8641	0.550157	bio13	10	0.999622
1A_30325619	1A	30325619	A	G	-3.14909	4.18372	0.452251	bio13	10	0.999622
1A_30325625	1A	30325625	T	G	-0.501945	3.94068	0.898733	bio13	10	0.999622
1A_30525359	1A	30525359	G	C	-5.14649	16.8018	0.759595	bio13	10	0.999622
1A_30886092	1A	30886092	C	T	1.07519	5.23828	0.837519	bio13	10	0.999622
1A_30892198	1A	30892198	C	T	-1.12439	5.63152	0.841889	bio13	10	0.999622
1A_31062910	1A	31062910	G	A	-4.65977	4.78999	0.33147	bio13	10	0.999622
1A_31104425	1A	31104425	C	A	6.68664	9.88769	0.499425	bio13	10	0.999622
1A_31235389	1A	31235389	C	T	15.9695	15.0899	0.290819	bio13	10	0.999622
1A_31235390	1A	31235390	G	C	15.9695	15.0899	0.290819	bio13	10	0.999622
1A_31255586	1A	31255586	G	A	1.21562	4.4359	0.784252	bio13	10	0.999622
1A_31335210	1A	31335210	T	C	1.82109	7.62614	0.811435	bio13	10	0.999622
1A_31335508	1A	31335508	C	T	2.08285	7.6777	0.786368	bio13	10	0.999622
1A_31394774	1A	31394774	T	C	2.84802	3.57374	0.426155	bio13	10	0.999622
1A_31394778	1A	31394778	C	T	3.12693	3.57689	0.382745	bio13	10	0.999622
1A_31394817	1A	31394817	C	T	3.12693	3.57689	0.382745	bio13	10	0.999622
1A_31394828	1A	31394828	C	T	5.22427	13.1033	0.690413	bio13	10	0.999622
1A_31523001	1A	31523001	C	A	26.1856	13.7098	0.057138	bio13	10	0.999622
1A_31883562	1A	31883562	C	T	0.880512	4.28991	0.837522	bio13	10	0.999622
1A_31883793	1A	31883793	A	G	0.935414	4.24845	0.82589	bio13	10	0.999622
1A_31883803	1A	31883803	A	G	0.935414	4.24845	0.82589	bio13	10	0.999622
1A_32095340	1A	32095340	T	C	4.96151	3.92489	0.207221	bio13	10	0.999622
1A_32095636	1A	32095636	C	T	4.89791	3.91128	0.211505	bio13	10	0.999622
1A_32189576	1A	32189576	C	A	-4.84162	5.26118	0.358218	bio13	10	0.999622
1A_32189622	1A	32189622	G	A	20.6132	12.6026	0.103022	bio13	10	0.999622
1A_32189840	1A	32189840	A	T	-4.953	5.18705	0.340448	bio13	10	0.999622
1A_32241487	1A	32241487	A	G	-4.46497	5.32149	0.402148	bio13	10	0.999622
1A_32241541	1A	32241541	C	T	-12.0063	14.4609	0.407085	bio13	10	0.999622
1A_32241785	1A	32241785	C	T	-5.03509	5.26299	0.339531	bio13	10	0.999622
1A_32356006	1A	32356006	C	T	-3.04921	5.41508	0.573813	bio13	10	0.999622
1A_32460687	1A	32460687	C	T	-4.22338	5.16464	0.414184	bio13	10	0.999622
1A_32460918	1A	32460918	A	G	-4.00456	5.18697	0.440729	bio13	10	0.999622
1A_32460976	1A	32460976	C	G	2.67157	6.9185	0.699675	bio13	10	0.999622
1A_32461391	1A	32461391	C	A	-8.68724	5.2905	0.101684	bio13	10	0.999622
1A_32510218	1A	32510218	A	C	-3.67687	5.30121	0.488503	bio13	10	0.999622
1A_32528599	1A	32528599	G	A	-4.0119	5.24402	0.44488	bio13	10	0.999622
1A_32528790	1A	32528790	A	G	-4.0119	5.24402	0.44488	bio13	10	0.999622
1A_32551744	1A	32551744	C	A	-5.63366	5.23705	0.282957	bio13	10	0.999622
1A_32562117	1A	32562117	A	G	-3.58601	5.25213	0.495305	bio13	10	0.999622
1A_32570706	1A	32570706	G	T	-3.15923	5.3477	0.555147	bio13	10	0.999622
1A_32571005	1A	32571005	A	T	-3.41484	5.09588	0.503325	bio13	10	0.999622
1A_32601412	1A	32601412	T	A	3.96742	6.77006	0.558322	bio13	10	0.999622
1A_32614724	1A	32614724	A	G	-5.54272	4.01175	0.168171	bio13	10	0.999622
1A_32641951	1A	32641951	G	T	3.40963	16.7248	0.838603	bio13	10	0.999622
1A_32669947	1A	32669947	T	C	4.29372	10.6416	0.686896	bio13	10	0.999622
1A_32729053	1A	32729053	C	T	1.32251	3.20742	0.680409	bio13	10	0.999622
1A_32729572	1A	32729572	A	T	2.64858	3.1982	0.40828	bio13	10	0.999622
1A_32833987	1A	32833987	C	T	-4.91586	15.0253	0.743778	bio13	10	0.999622
1A_32960560	1A	32960560	A	G	-0.388777	6.02895	0.948629	bio13	10	0.999622
1A_33009477	1A	33009477	G	T	-2.36424	5.0485	0.639924	bio13	10	0.999622
1A_33038398	1A	33038398	G	A	-2.53291	4.99077	0.612183	bio13	10	0.999622
1A_33058084	1A	33058084	C	T	-0.377849	5.08111	0.940773	bio13	10	0.999622
1A_33074975	1A	33074975	A	G	-0.582754	4.88309	0.905089	bio13	10	0.999622
1A_33180077	1A	33180077	A	C	-6.70366	4.8825	0.170832	bio13	10	0.999622
1A_33197394	1A	33197394	C	T	-3.17558	4.1508	0.444873	bio13	10	0.999622
1A_33198303	1A	33198303	C	T	-2.53396	4.27953	0.554245	bio13	10	0.999622
1A_33204077	1A	33204077	C	A	5.42157	9.33953	0.562038	bio13	10	0.999622
1A_33244839	1A	33244839	G	A	-1.55791	7.76468	0.841123	bio13	10	0.999622
1A_33245161	1A	33245161	G	T	-3.11184	4.19373	0.458685	bio13	10	0.999622
1A_33290528	1A	33290528	C	T	-4.09123	4.08719	0.317682	bio13	10	0.999622
1A_33316053	1A	33316053	T	C	-3.55425	4.00814	0.375956	bio13	10	0.999622
1A_33360898	1A	33360898	A	T	-3.72252	5.47708	0.497276	bio13	10	0.999622
1A_33477556	1A	33477556	G	A	-3.59634	8.41514	0.669436	bio13	10	0.999622
1A_33501338	1A	33501338	A	G	-7.96308	5.75582	0.167599	bio13	10	0.999622
1A_33501339	1A	33501339	G	A	-7.96308	5.75582	0.167599	bio13	10	0.999622
1A_33501346	1A	33501346	C	G	-7.96308	5.75582	0.167599	bio13	10	0.999622
1A_33501618	1A	33501618	A	G	-8.05729	5.79703	0.165644	bio13	10	0.999622
1A_33503248	1A	33503248	A	G	-7.86648	5.91447	0.184569	bio13	10	0.999622
1A_33503320	1A	33503320	C	T	-1.60227	14.3694	0.911294	bio13	10	0.999622
1A_33539321	1A	33539321	C	T	-7.22375	6.3671	0.25752	bio13	10	0.999622
1A_34095620	1A	34095620	C	T	-12.3018	12.601	0.329766	bio13	10	0.999622
1A_34446870	1A	34446870	A	G	6.28084	5.0195	0.211856	bio13	10	0.999622
1A_34447113	1A	34447113	A	G	6.83706	5.05506	0.177282	bio13	10	0.999622
1A_34448274	1A	34448274	C	T	20.2558	17.1911	0.239671	bio13	10	0.999622
1A_34448281	1A	34448281	T	C	4.56471	5.03806	0.365677	bio13	10	0.999622
1A_34448566	1A	34448566	T	C	5.41073	5.08621	0.288318	bio13	10	0.999622
1A_34459992	1A	34459992	T	C	3.57532	5.26579	0.497707	bio13	10	0.999622
1A_34479536	1A	34479536	A	G	-3.21748	20.5612	0.875763	bio13	10	0.999622
1A_34655318	1A	34655318	A	C	0.815182	4.96702	0.869754	bio13	10	0.999622
1A_34656657	1A	34656657	T	A	-0.0972482	5.07559	0.984727	bio13	10	0.999622
1A_34665907	1A	34665907	A	G	-0.0462281	4.76219	0.992262	bio13	10	0.999622
1A_34695935	1A	34695935	T	C	1.62983	4.81807	0.735405	bio13	10	0.999622
1A_34740308	1A	34740308	G	A	2.3833	5.9295	0.688029	bio13	10	0.999622
1A_34814250	1A	34814250	T	C	-10.3428	5.27207	0.0507576	bio13	10	0.999622
1A_34854307	1A	34854307	T	C	-14.8669	6.29949	0.018948	bio13	10	0.999622
1A_34972677	1A	34972677	A	G	2.88179	3.70363	0.437156	bio13	10	0.999622
1A_34972710	1A	34972710	G	A	3.38115	3.78245	0.372128	bio13	10	0.999622
1A_34972718	1A	34972718	C	A	3.38115	3.78245	0.372128	bio13	10	0.999622
1A_34972735	1A	34972735	C	T	2.72234	3.70364	0.462917	bio13	10	0.999622
1A_34972760	1A	34972760	G	A	3.38115	3.78245	0.372128	bio13	10	0.999622
1A_35200443	1A	35200443	T	C	-11.738	10.4863	0.263931	bio13	10	0.999622
1A_35528514	1A	35528514	T	G	-2.71248	5.04454	0.591199	bio13	10	0.999622
1A_35528543	1A	35528543	G	C	-2.17775	4.97317	0.661791	bio13	10	0.999622
1A_35568240	1A	35568240	C	T	-22.6486	19.8331	0.254428	bio13	10	0.999622
1A_35568297	1A	35568297	G	A	-3.11827	5.2145	0.550315	bio13	10	0.999622
1A_36158360	1A	36158360	A	G	5.34343	3.43018	0.120398	bio13	10	0.999622
1A_36159057	1A	36159057	A	G	18.0523	11.9631	0.132406	bio13	10	0.999622
1A_36159301	1A	36159301	C	T	17.4183	11.6285	0.135268	bio13	10	0.999622
1A_36159306	1A	36159306	G	A	17.4183	11.6285	0.135268	bio13	10	0.999622
1A_36183652	1A	36183652	G	A	-5.81958	9.80061	0.553118	bio13	10	0.999622
1A_36305141	1A	36305141	A	T	-4.72214	4.35869	0.279553	bio13	10	0.999622
1A_36326517	1A	36326517	G	T	-3.43631	4.54622	0.450356	bio13	10	0.999622
1A_36415411	1A	36415411	G	T	-0.668376	4.60596	0.884726	bio13	10	0.999622
1A_36561534	1A	36561534	A	T	0.638265	4.30403	0.882215	bio13	10	0.999622
1A_36614718	1A	36614718	C	A	-17.2354	7.71224	0.0262047	bio13	10	0.999622
1A_36614727	1A	36614727	G	A	-16.6607	8.09014	0.040366	bio13	10	0.999622
1A_36614797	1A	36614797	C	T	-9.99357	6.31504	0.114644	bio13	10	0.999622
1A_36732261	1A	36732261	G	A	3.41244	4.27975	0.425914	bio13	10	0.999622
1A_36858841	1A	36858841	G	A	5.21127	5.70376	0.361671	bio13	10	0.999622
1A_36931968	1A	36931968	C	T	4.02772	5.64115	0.475818	bio13	10	0.999622
1A_36952001	1A	36952001	C	A	4.14769	5.35935	0.439622	bio13	10	0.999622
1A_36961469	1A	36961469	G	A	3.73559	5.6771	0.511063	bio13	10	0.999622
1A_36961718	1A	36961718	A	G	5.65406	4.37767	0.197553	bio13	10	0.999622
1A_36961806	1A	36961806	A	G	3.09617	5.95437	0.603479	bio13	10	0.999622
1A_37245756	1A	37245756	T	C	9.13908	4.78502	0.0571453	bio13	10	0.999622
1A_37246545	1A	37246545	T	A	7.43096	5.19378	0.1536	bio13	10	0.999622
1A_37246546	1A	37246546	T	A	7.43096	5.19378	0.1536	bio13	10	0.999622
1A_37269751	1A	37269751	C	T	5.63316	5.1387	0.273907	bio13	10	0.999622
1A_37269808	1A	37269808	A	G	5.63316	5.1387	0.273907	bio13	10	0.999622
1A_37269843	1A	37269843	T	G	5.63316	5.1387	0.273907	bio13	10	0.999622
1A_37275228	1A	37275228	T	C	9.80302	5.12907	0.0569732	bio13	10	0.999622
1A_37275263	1A	37275263	T	C	9.80302	5.12907	0.0569732	bio13	10	0.999622
1A_37275516	1A	37275516	A	G	9.80302	5.12907	0.0569732	bio13	10	0.999622
1A_37275520	1A	37275520	A	C	9.80302	5.12907	0.0569732	bio13	10	0.999622
1A_37302517	1A	37302517	C	T	11.0513	4.09621	0.00739323	bio13	10	0.999622
1A_37302821	1A	37302821	G	A	11.037	4.16664	0.00852597	bio13	10	0.999622
1A_37302824	1A	37302824	G	A	11.1874	4.16749	0.00769037	bio13	10	0.999622
1A_37302867	1A	37302867	T	A	12.0328	4.12996	0.00385652	bio13	10	0.999622
1A_37389005	1A	37389005	G	A	5.60752	7.84726	0.475452	bio13	10	0.999622
1A_37393621	1A	37393621	G	C	2.73871	5.08333	0.590471	bio13	10	0.999622
1A_37416567	1A	37416567	A	G	8.54087	4.90106	0.0824718	bio13	10	0.999622
1A_37435994	1A	37435994	A	C	0.0223033	7.92104	0.997755	bio13	10	0.999895
1A_37436313	1A	37436313	C	A	-4.01925	4.2385	0.343794	bio13	10	0.999622
1A_37471385	1A	37471385	G	A	-3.18666	9.52275	0.738146	bio13	10	0.999622
1A_37570850	1A	37570850	C	G	-1.95366	9.12263	0.830579	bio13	10	0.999622
1A_38034126	1A	38034126	G	A	6.39776	8.11977	0.431396	bio13	10	0.999622
1A_38035327	1A	38035327	G	A	0.335548	7.54052	0.964538	bio13	10	0.999622
1A_38080287	1A	38080287	G	A	-4.64664	10.9982	0.672985	bio13	10	0.999622
1A_38080958	1A	38080958	C	A	2.7966	11.2099	0.803173	bio13	10	0.999622
1A_38265710	1A	38265710	C	T	-5.60377	7.61459	0.462381	bio13	10	0.999622
1A_38327368	1A	38327368	G	A	-0.23858	13.5634	0.985978	bio13	10	0.999622
1A_38327400	1A	38327400	G	A	0.745469	10.0481	0.940911	bio13	10	0.999622
1A_38477799	1A	38477799	A	T	-14.2499	7.73841	0.0665957	bio13	10	0.999622
1A_38477815	1A	38477815	C	G	9.03726	3.68768	0.0148604	bio13	10	0.999622
1A_38855167	1A	38855167	C	G	14.8643	11.5355	0.198592	bio13	10	0.999622
1A_39098933	1A	39098933	C	G	2.24751	10.4659	0.830119	bio13	10	0.999622
1A_39212323	1A	39212323	G	T	4.13749	3.27933	0.208093	bio13	10	0.999622
1A_39387090	1A	39387090	A	T	-1.20543	3.30605	0.715671	bio13	10	0.999622
1A_39421116	1A	39421116	C	T	0.787828	6.68655	0.906291	bio13	10	0.999622
1A_39496069	1A	39496069	T	C	-9.22482	11.4057	0.41931	bio13	10	0.999622
1A_39500476	1A	39500476	C	G	-0.475893	10.599	0.964219	bio13	10	0.999622
1A_39702189	1A	39702189	G	T	3.18371	4.45021	0.474944	bio13	10	0.999622
1A_39707959	1A	39707959	G	A	-5.92342	4.29489	0.168921	bio13	10	0.999622
1A_39759095	1A	39759095	A	G	-7.30898	4.02852	0.0706817	bio13	10	0.999622
1A_40040339	1A	40040339	C	T	-13.9344	7.73349	0.0726304	bio13	10	0.999622
1A_40174583	1A	40174583	G	T	-14.7776	7.9808	0.0651115	bio13	10	0.999622
1A_40174912	1A	40174912	A	G	-5.61092	7.75347	0.469865	bio13	10	0.999622
1A_40174924	1A	40174924	T	A	-5.61092	7.75347	0.469865	bio13	10	0.999622
1A_40346934	1A	40346934	A	G	15.1808	10.6601	0.155517	bio13	10	0.999622
1A_40346945	1A	40346945	C	T	15.1808	10.6601	0.155517	bio13	10	0.999622
1A_40347095	1A	40347095	A	G	15.1808	10.6601	0.155517	bio13	10	0.999622
1A_40347222	1A	40347222	A	G	13.0215	10.389	0.211089	bio13	10	0.999622
1A_40347228	1A	40347228	A	G	13.0215	10.389	0.211089	bio13	10	0.999622
1A_40347248	1A	40347248	A	G	13.0215	10.389	0.211089	bio13	10	0.999622
1A_40347275	1A	40347275	G	A	14.801	11.4292	0.196362	bio13	10	0.999622
1A_40347291	1A	40347291	C	T	14.801	11.4292	0.196362	bio13	10	0.999622
1A_40379296	1A	40379296	G	T	8.78887	10.7741	0.415328	bio13	10	0.999622
1A_40468946	1A	40468946	T	C	10.9249	10.4809	0.298127	bio13	10	0.999622
1A_40512453	1A	40512453	T	A	-1.18107	11.7949	0.920308	bio13	10	0.999622
1A_40512634	1A	40512634	A	T	44.397	19.7095	0.0250468	bio13	10	0.999622
1A_40550441	1A	40550441	C	T	8.46235	9.52505	0.375058	bio13	10	0.999622
1A_40559115	1A	40559115	G	A	-10.1116	12.4994	0.419211	bio13	10	0.999622
1A_40569218	1A	40569218	A	G	7.95669	8.35961	0.342004	bio13	10	0.999622
1A_40569283	1A	40569283	C	G	7.95669	8.35961	0.342004	bio13	10	0.999622
1B_193603	1B	193603	G	C	-4.58835	14.0159	0.74363	bio13	10	0.999622
1B_312140	1B	312140	G	C	13.1849	6.98281	0.0600157	bio13	10	0.999622
1B_718055	1B	718055	G	C	-3.80262	5.23539	0.468232	bio13	10	0.999622
1B_736571	1B	736571	C	T	-1.49895	5.74901	0.794488	bio13	10	0.999622
1B_736575	1B	736575	T	A	-11.3837	13.2953	0.392595	bio13	10	0.999622
1B_829935	1B	829935	T	C	1.71003	5.93707	0.773537	bio13	10	0.999622
1B_1049583	1B	1049583	G	A	3.16161	15.3717	0.83719	bio13	10	0.999622
1B_1125503	1B	1125503	G	C	-2.1745	4.364	0.618671	bio13	10	0.999622
1B_1175130	1B	1175130	A	T	-2.5484	10.6517	0.811085	bio13	10	0.999622
1B_1217502	1B	1217502	C	T	-0.509043	11.3491	0.964256	bio13	10	0.999622
1B_1283812	1B	1283812	T	C	15.0896	15.4608	0.329899	bio13	10	0.999622
1B_1293143	1B	1293143	G	A	13.5378	9.85251	0.170507	bio13	10	0.999622
1B_1531410	1B	1531410	G	A	-7.66094	6.65324	0.250508	bio13	10	0.999622
1B_1533558	1B	1533558	G	A	-0.771758	10.251	0.94004	bio13	10	0.999622
1B_1548116	1B	1548116	G	A	-15.3129	14.2343	0.282941	bio13	10	0.999622
1B_1548155	1B	1548155	C	T	11.7055	8.53521	0.171317	bio13	10	0.999622
1B_1625854	1B	1625854	C	T	8.01148	8.07662	0.322071	bio13	10	0.999622
1B_1632317	1B	1632317	G	T	7.83438	7.1695	0.275432	bio13	10	0.999622
1B_1689790	1B	1689790	C	T	5.04894	45.6266	0.911966	bio13	10	0.999622
1B_1725967	1B	1725967	A	G	2.9562	9.28052	0.75031	bio13	10	0.999622
1B_1808456	1B	1808456	C	A	-0.514224	3.53727	0.884519	bio13	10	0.999622
1B_1836051	1B	1836051	T	C	-1.57052	3.59008	0.662109	bio13	10	0.999622
1B_1836298	1B	1836298	G	A	-1.45185	3.55697	0.683455	bio13	10	0.999622
1B_1871794	1B	1871794	C	G	-0.768142	3.61536	0.831895	bio13	10	0.999622
1B_1877371	1B	1877371	G	A	0.563785	3.48439	0.871575	bio13	10	0.999622
1B_1894598	1B	1894598	A	G	-1.30257	3.61228	0.718669	bio13	10	0.999622
1B_2077502	1B	2077502	G	A	-5.84941	8.91	0.512033	bio13	10	0.999622
1B_2083881	1B	2083881	G	A	5.18005	6.97063	0.458018	bio13	10	0.999622
1B_2126791	1B	2126791	C	G	3.02662	4.69462	0.51964	bio13	10	0.999622
1B_2126846	1B	2126846	T	C	3.25841	4.6831	0.487133	bio13	10	0.999622
1B_2202974	1B	2202974	A	T	-0.748905	10.8466	0.945002	bio13	10	0.999622
1B_2220641	1B	2220641	C	A	-20.9452	15.6651	0.18227	bio13	10	0.999622
1B_2235792	1B	2235792	A	T	8.91018	11.5631	0.4416	bio13	10	0.999622
1B_2242781	1B	2242781	G	T	1.94717	11.9305	0.870469	bio13	10	0.999622
1B_2243827	1B	2243827	G	A	8.91018	11.5631	0.4416	bio13	10	0.999622
1B_2244257	1B	2244257	G	C	5.30474	12.1762	0.663409	bio13	10	0.999622
1B_2244528	1B	2244528	T	C	7.6179	10.3963	0.464312	bio13	10	0.999622
1B_2244574	1B	2244574	T	C	7.6179	10.3963	0.464312	bio13	10	0.999622
1B_2244579	1B	2244579	G	A	7.6179	10.3963	0.464312	bio13	10	0.999622
1B_2303358	1B	2303358	G	A	4.33625	10.1654	0.670013	bio13	10	0.999622
1B_2349528	1B	2349528	A	G	-1.11366	10.1521	0.912727	bio13	10	0.999622
1B_2352800	1B	2352800	A	G	0.434587	10.1292	0.965808	bio13	10	0.999622
1B_2363700	1B	2363700	G	A	1.9498	6.71636	0.771793	bio13	10	0.999622
1B_2373982	1B	2373982	C	G	-1.09416	3.76176	0.771366	bio13	10	0.999622
1B_2374317	1B	2374317	A	C	-1.54934	3.77178	0.681549	bio13	10	0.999622
1B_2420262	1B	2420262	C	T	22.6344	18.5078	0.222355	bio13	10	0.999622
1B_2420468	1B	2420468	G	T	-8.09289	21.1787	0.702654	bio13	10	0.999622
1B_2420516	1B	2420516	A	G	2.36528	4.58631	0.606446	bio13	10	0.999622
1B_2468455	1B	2468455	G	T	4.38284	5.2993	0.408895	bio13	10	0.999622
1B_2574148	1B	2574148	T	C	-8.07832	11.2356	0.472734	bio13	10	0.999622
1B_2660340	1B	2660340	T	A	12.2717	14.1518	0.386589	bio13	10	0.999622
1B_2780892	1B	2780892	G	A	9.41004	6.91243	0.174487	bio13	10	0.999622
1B_2838037	1B	2838037	C	A	-6.23304	12.0653	0.605829	bio13	10	0.999622
1B_2928747	1B	2928747	T	A	-15.5006	13.8761	0.264903	bio13	10	0.999622
1B_2943941	1B	2943941	C	T	-15.5006	13.8761	0.264903	bio13	10	0.999622
1B_3058292	1B	3058292	C	G	4.67392	6.54332	0.475623	bio13	10	0.999622
1B_3131199	1B	3131199	A	C	3.94782	13.5966	0.771757	bio13	10	0.999622
1B_3131514	1B	3131514	A	G	-1.36049	6.05025	0.822245	bio13	10	0.999622
1B_3131854	1B	3131854	T	C	-2.32497	7.17267	0.746067	bio13	10	0.999622
1B_3239676	1B	3239676	C	A	-3.12816	9.58008	0.744265	bio13	10	0.999622
1B_3261737	1B	3261737	A	G	4.10076	11.5487	0.722788	bio13	10	0.999622
1B_3289186	1B	3289186	G	T	3.68624	5.80102	0.525647	bio13	10	0.999622
1B_3289504	1B	3289504	T	G	4.25592	5.65222	0.452093	bio13	10	0.999622
1B_3289565	1B	3289565	C	T	4.25592	5.65222	0.452093	bio13	10	0.999622
1B_3289660	1B	3289660	C	T	5.65878	5.37012	0.292888	bio13	10	0.999622
1B_3289938	1B	3289938	A	G	3.7053	5.56374	0.505967	bio13	10	0.999622
1B_3289989	1B	3289989	G	A	3.8467	5.54762	0.488626	bio13	10	0.999622
1B_3444087	1B	3444087	C	T	-10.7099	8.74125	0.221505	bio13	10	0.999622
1B_3444107	1B	3444107	A	T	-10.7099	8.74125	0.221505	bio13	10	0.999622
1B_3444425	1B	3444425	A	G	-10.7099	8.74125	0.221505	bio13	10	0.999622
1B_3444645	1B	3444645	A	G	-10.7099	8.74125	0.221505	bio13	10	0.999622
1B_3479107	1B	3479107	C	G	-11.8501	8.201	0.149569	bio13	10	0.999622
1B_3490143	1B	3490143	A	G	-15.847	9.04957	0.0809992	bio13	10	0.999622
1B_3490632	1B	3490632	G	A	-16.2575	12.464	0.193164	bio13	10	0.999622
1B_3596123	1B	3596123	C	G	-10.5393	9.25481	0.255744	bio13	10	0.999622
1B_3728204	1B	3728204	A	C	-6.25787	15.0079	0.677014	bio13	10	0.999622
1B_3728904	1B	3728904	T	C	-5.95367	6.28291	0.344138	bio13	10	0.999622
1B_3845727	1B	3845727	C	G	-8.54836	4.59584	0.0639125	bio13	10	0.999622
1B_4369275	1B	4369275	C	T	-2.66326	3.73574	0.476482	bio13	10	0.999622
1B_4827324	1B	4827324	C	T	-2.77774	11.8106	0.81423	bio13	10	0.999622
1B_4827381	1B	4827381	G	A	8.22368	15.7659	0.602346	bio13	10	0.999622
1B_4839506	1B	4839506	C	A	5.0952	4.46291	0.254547	bio13	10	0.999622
1B_4840511	1B	4840511	G	A	3.55115	4.53079	0.43382	bio13	10	0.999622
1B_4863673	1B	4863673	T	C	-3.37677	4.32305	0.435387	bio13	10	0.999622
1B_4864018	1B	4864018	A	G	-2.48455	4.32472	0.566083	bio13	10	0.999622
1B_5012508	1B	5012508	C	A	-3.13754	4.93009	0.525022	bio13	10	0.999622
1B_5295881	1B	5295881	A	G	-1.03543	9.87039	0.916527	bio13	10	0.999622
1B_5425931	1B	5425931	C	T	-7.01372	3.78142	0.0646595	bio13	10	0.999622
1B_5425932	1B	5425932	G	A	-7.01599	3.62548	0.0539563	bio13	10	0.999622
1B_5485074	1B	5485074	G	T	1.98936	4.30767	0.644565	bio13	10	0.999622
1B_5485327	1B	5485327	T	A	1.51896	4.31934	0.72535	bio13	10	0.999622
1B_5572434	1B	5572434	T	G	-13.4916	6.09492	0.0276497	bio13	10	0.999622
1B_5578537	1B	5578537	G	T	-8.78936	3.93799	0.026396	bio13	10	0.999622
1B_5628701	1B	5628701	C	G	-6.28345	6.67019	0.34698	bio13	10	0.999622
1B_5629069	1B	5629069	G	T	-4.86118	7.19251	0.499673	bio13	10	0.999622
1B_5728657	1B	5728657	T	G	4.96434	8.98674	0.581102	bio13	10	0.999622
1B_5763711	1B	5763711	C	T	2.68228	4.40011	0.542616	bio13	10	0.999622
1B_5767487	1B	5767487	G	C	-4.53158	20.069	0.821519	bio13	10	0.999622
1B_5767711	1B	5767711	G	A	3.10238	4.14032	0.454289	bio13	10	0.999622
1B_5815567	1B	5815567	C	A	0.189274	7.85858	0.980802	bio13	10	0.999622
1B_5815600	1B	5815600	T	C	0.189274	7.85858	0.980802	bio13	10	0.999622
1B_5830927	1B	5830927	G	T	4.43911	4.70626	0.34636	bio13	10	0.999622
1B_5888192	1B	5888192	T	C	4.66176	5.02166	0.354022	bio13	10	0.999622
1B_5979026	1B	5979026	G	C	0.851966	5.72886	0.881884	bio13	10	0.999622
1B_6104418	1B	6104418	T	C	-4.33346	10.105	0.668362	bio13	10	0.999622
1B_6327257	1B	6327257	T	C	-0.935506	4.17324	0.822788	bio13	10	0.999622
1B_6327260	1B	6327260	C	G	-0.935506	4.17324	0.822788	bio13	10	0.999622
1B_6447187	1B	6447187	A	C	-0.509687	4.65528	0.912894	bio13	10	0.999622
1B_6497689	1B	6497689	G	T	8.71211	10.5065	0.407681	bio13	10	0.999622
1B_6575327	1B	6575327	C	T	-6.97656	10.2718	0.497565	bio13	10	0.999622
1B_6575536	1B	6575536	T	C	-6.97656	10.2718	0.497565	bio13	10	0.999622
1B_6575583	1B	6575583	T	C	-6.97656	10.2718	0.497565	bio13	10	0.999622
1B_6612908	1B	6612908	A	G	-6.9805	9.5749	0.466575	bio13	10	0.999622
1B_6626702	1B	6626702	G	T	2.85521	7.68261	0.710432	bio13	10	0.999622
1B_6675876	1B	6675876	G	T	-5.81867	11.0084	0.597516	bio13	10	0.999622
1B_6681290	1B	6681290	C	T	-0.209238	3.95023	0.957794	bio13	10	0.999622
1B_6681304	1B	6681304	C	T	-0.209238	3.95023	0.957794	bio13	10	0.999622
1B_6749957	1B	6749957	C	A	-6.25663	9.48836	0.510171	bio13	10	0.999622
1B_6863579	1B	6863579	T	G	-3.26904	11.0518	0.767605	bio13	10	0.999622
1B_6998675	1B	6998675	C	T	-7.24901	7.77327	0.351839	bio13	10	0.999622
1B_6998696	1B	6998696	C	A	-7.24901	7.77327	0.351839	bio13	10	0.999622
1B_7254865	1B	7254865	G	T	9.5907	7.97964	0.230401	bio13	10	0.999622
1B_7348186	1B	7348186	G	T	-6.70093	9.37079	0.475141	bio13	10	0.999622
1B_7348443	1B	7348443	C	T	-6.70093	9.37079	0.475141	bio13	10	0.999622
1B_7348458	1B	7348458	C	A	-6.70093	9.37079	0.475141	bio13	10	0.999622
1B_7384361	1B	7384361	G	C	9.59999	6.80422	0.159368	bio13	10	0.999622
1B_7384595	1B	7384595	C	G	1.45269	8.8056	0.869082	bio13	10	0.999622
1B_7414311	1B	7414311	T	G	-5.24701	9.66346	0.587572	bio13	10	0.999622
1B_7414324	1B	7414324	G	A	-5.24701	9.66346	0.587572	bio13	10	0.999622
1B_7510133	1B	7510133	T	C	-5.30428	8.67764	0.541515	bio13	10	0.999622
1B_7559952	1B	7559952	G	C	1.71182	6.5705	0.794642	bio13	10	0.999622
1B_7680273	1B	7680273	A	T	-1.17359	5.1668	0.820477	bio13	10	0.999622
1B_7687143	1B	7687143	A	G	-3.80818	4.89694	0.437411	bio13	10	0.999622
1B_7746296	1B	7746296	C	T	-3.81627	8.2375	0.643517	bio13	10	0.999622
1B_7746324	1B	7746324	G	A	-2.0541	8.33017	0.805406	bio13	10	0.999622
1B_7775239	1B	7775239	G	A	-4.57135	11.4947	0.691155	bio13	10	0.999622
1B_7808551	1B	7808551	G	A	-7.11346	12.9741	0.583928	bio13	10	0.999622
1B_7829494	1B	7829494	G	A	-3.47768	6.1312	0.571017	bio13	10	0.999622
1B_7845879	1B	7845879	T	C	-2.25644	4.20168	0.591664	bio13	10	0.999622
1B_7917566	1B	7917566	C	A	-6.1458	14.8827	0.679954	bio13	10	0.999622
1B_7951707	1B	7951707	C	T	-4.83119	7.08167	0.49566	bio13	10	0.999622
1B_7964039	1B	7964039	G	A	-1.72146	14.1809	0.903466	bio13	10	0.999622
1B_7964725	1B	7964725	C	G	-6.1458	14.8827	0.679954	bio13	10	0.999622
1B_7964796	1B	7964796	T	C	-6.1458	14.8827	0.679954	bio13	10	0.999622
1B_8002735	1B	8002735	A	G	-15.6417	10.2028	0.126366	bio13	10	0.999622
1B_8009732	1B	8009732	T	C	-8.95984	13.1309	0.495572	bio13	10	0.999622
1B_8097114	1B	8097114	C	T	0.0660678	8.70911	0.993953	bio13	10	0.999622
1B_8300597	1B	8300597	C	T	7.14022	6.54546	0.276253	bio13	10	0.999622
1B_8300640	1B	8300640	A	G	7.14022	6.54546	0.276253	bio13	10	0.999622
1B_8304377	1B	8304377	A	T	13.9405	12.0964	0.250103	bio13	10	0.999622
1B_8304392	1B	8304392	T	A	13.9405	12.0964	0.250103	bio13	10	0.999622
1B_8304405	1B	8304405	T	A	-0.808482	12.5601	0.948722	bio13	10	0.999622
1B_8343276	1B	8343276	C	T	1.72688	5.40613	0.749635	bio13	10	0.999622
1B_8343278	1B	8343278	T	C	-4.08213	5.18606	0.431857	bio13	10	0.999622
1B_8369219	1B	8369219	C	T	5.64265	6.42148	0.380296	bio13	10	0.999622
1B_8369502	1B	8369502	A	G	-2.6671	11.3316	0.814092	bio13	10	0.999622
1B_8508529	1B	8508529	A	G	-4.90625	11.9474	0.681636	bio13	10	0.999622
1B_8880967	1B	8880967	C	A	-4.3311	6.90191	0.53082	bio13	10	0.999622
1B_8954343	1B	8954343	T	C	2.50386	5.01314	0.617841	bio13	10	0.999622
1B_8954373	1B	8954373	C	A	2.04606	4.96265	0.680436	bio13	10	0.999622
1B_8995419	1B	8995419	A	T	-2.26986	4.15451	0.585246	bio13	10	0.999622
1B_8997666	1B	8997666	A	T	2.37147	3.76283	0.529045	bio13	10	0.999622
1B_9064257	1B	9064257	G	A	-4.08848	5.66168	0.470805	bio13	10	0.999622
1B_9082169	1B	9082169	A	C	-1.22133	4.38024	0.780579	bio13	10	0.999622
1B_9082176	1B	9082176	G	A	0.0461515	3.89001	0.990542	bio13	10	0.999622
1B_9082418	1B	9082418	G	A	2.55589	6.18893	0.679934	bio13	10	0.999622
1B_9145080	1B	9145080	A	G	-1.36607	5.17546	0.792009	bio13	10	0.999622
1B_9145405	1B	9145405	T	A	5.17082	4.97479	0.299497	bio13	10	0.999622
[truncated: 422,783+ more rows]

## Sheet: Supplemental File 1F
Et_gene	chromsome	start	end	strand	id_At	perc_identity_At	evalue_At	perc_query_coverage_per_subject_At	id_Zm	perc_identity_Zm	evalue_Zm	perc_query_coverage_per_subject_Zm	Number of QTN	LD block
Et_10A_001374	10A	2480919	2482474	+	AT4G20760.1	60.606	0.000119	6	tr|A0A1D6KFZ2|A0A1D6KFZ2_MAIZE	76.471	2.02e-09	7	1	B_935
Et_10A_001381	10A	2483162	2484035	-	NA	NA	NA	NA	NA	NA	NA	NA	1	B_935
Et_10A_002155	10A	2483177	2485304	+	AT5G10530.1	50	9.42e-122	53	tr|A0A1D6DSQ6|A0A1D6DSQ6_MAIZE	72.145	1.44e-179	50	1	B_935
Et_10A_001380	10A	2484042	2485235	-	NA	NA	NA	NA	tr|A0A1D6GBD1|A0A1D6GBD1_MAIZE	52.542	1.6	14	1	B_935
Et_10A_001386	10A	2490350	2492236	-	AT5G64990.1	29.412	2.1	5	NA	NA	NA	NA	1	B_935
Et_10A_002156	10A	2493925	2494569	+	AT2G44050.1	29.358	2.7	50	tr|A0A1D6E9A6|A0A1D6E9A6_MAIZE	31.884	0.35	32	1	B_935
Et_10A_002157	10A	2497947	2507454	+	AT3G29450.1	51.429	0.048	1	tr|A0A1D6EAD5|A0A1D6EAD5_MAIZE	27.5	0.051	4	1	B_935
Et_10A_001387	10A	2510053	2512180	-	NA	NA	NA	NA	tr|B6SK37|B6SK37_MAIZE	33.333	0.014	21	1	B_935
Et_10A_001382	10A	2517452	2518070	+	NA	NA	NA	NA	tr|A0A1D6MWR3|A0A1D6MWR3_MAIZE	27.103	0.39	50	1	B_935
Et_10A_002150	10A	2518437	2521325	+	AT5G10530.1	45.198	5.56e-39	18	tr|A0A1D6KFY7|A0A1D6KFY7_MAIZE	51.075	2.82e-45	18	1	B_935
Et_10A_001388	10A	2520630	2527246	-	NA	NA	NA	NA	tr|A0A1D6GBD1|A0A1D6GBD1_MAIZE	43.662	0.31	3	1	B_935
Et_10A_002151	10A	2522847	2524952	+	NA	NA	NA	NA	NA	NA	NA	NA	1	B_935
Et_10A_001383	10A	2531492	2536874	+	AT1G79230.2	66.667	2.95e-07	10	tr|A0A1D6KFZ0|A0A1D6KFZ0_MAIZE	93.548	2.33e-12	15	1	B_935
Et_10A_001383	10A	2531492	2536874	+	AT1G79230.2	67.105	2.7e-25	10	tr|A0A1D6KFZ0|A0A1D6KFZ0_MAIZE	84	0.000711	15	1	B_935
Et_10A_001383	10A	2531492	2536874	+	AT1G79230.2	46.512	3.2	10	tr|A0A1D6KFZ0|A0A1D6KFZ0_MAIZE	93.548	2.33e-12	15	1	B_935
Et_10A_001383	10A	2531492	2536874	+	AT1G79230.2	57.692	2.5	10	tr|A0A1D6KFZ0|A0A1D6KFZ0_MAIZE	39.583	9.77e-26	15	1	B_935
Et_10A_001383	10A	2531492	2536874	+	AT1G79230.2	57.692	2.5	10	tr|A0A1D6KFZ0|A0A1D6KFZ0_MAIZE	87.5	1.8e-05	15	1	B_935
Et_10A_001383	10A	2531492	2536874	+	AT1G79230.2	66.667	2.95e-07	10	tr|A0A1D6KFZ0|A0A1D6KFZ0_MAIZE	39.583	9.77e-26	15	1	B_935
Et_10A_001383	10A	2531492	2536874	+	AT1G79230.2	46.512	3.2	10	tr|A0A1D6KFZ0|A0A1D6KFZ0_MAIZE	84	0.000711	15	1	B_935
Et_10A_001383	10A	2531492	2536874	+	AT1G79230.2	67.105	2.7e-25	10	tr|A0A1D6KFZ0|A0A1D6KFZ0_MAIZE	39.583	9.77e-26	15	1	B_935
Et_10A_001383	10A	2531492	2536874	+	AT1G79230.2	57.692	2.5	10	tr|A0A1D6KFZ0|A0A1D6KFZ0_MAIZE	84	0.000711	15	1	B_935
Et_10A_001383	10A	2531492	2536874	+	AT1G79230.2	67.105	2.7e-25	10	tr|A0A1D6KFZ0|A0A1D6KFZ0_MAIZE	87.5	1.8e-05	15	1	B_935
Et_10A_001383	10A	2531492	2536874	+	AT1G79230.2	67.105	2.7e-25	10	tr|A0A1D6KFZ0|A0A1D6KFZ0_MAIZE	93.548	2.33e-12	15	1	B_935
Et_10A_001383	10A	2531492	2536874	+	AT1G79230.2	66.667	2.95e-07	10	tr|A0A1D6KFZ0|A0A1D6KFZ0_MAIZE	84	0.000711	15	1	B_935
Et_10A_001383	10A	2531492	2536874	+	AT1G79230.2	46.512	3.2	10	tr|A0A1D6KFZ0|A0A1D6KFZ0_MAIZE	39.583	9.77e-26	15	1	B_935
Et_10A_001383	10A	2531492	2536874	+	AT1G79230.2	46.512	3.2	10	tr|A0A1D6KFZ0|A0A1D6KFZ0_MAIZE	87.5	1.8e-05	15	1	B_935
Et_10A_001383	10A	2531492	2536874	+	AT1G79230.2	57.692	2.5	10	tr|A0A1D6KFZ0|A0A1D6KFZ0_MAIZE	93.548	2.33e-12	15	1	B_935
Et_10A_001383	10A	2531492	2536874	+	AT1G79230.2	66.667	2.95e-07	10	tr|A0A1D6KFZ0|A0A1D6KFZ0_MAIZE	87.5	1.8e-05	15	1	B_935
Et_10A_002154	10A	2537203	2539269	-	AT1G64550.1	24.194	1.6	18	tr|B6SK37|B6SK37_MAIZE	41.026	0.029	10	1	B_935
Et_10A_000338	10A	2541408	2541674	+	AT1G10700.1	36.111	4.8	41	NA	NA	NA	NA	1	B_935
Et_10A_001384	10A	2545499	2559389	+	AT5G10530.1	52.022	6e-119	8	tr|A0A1D6KFY7|A0A1D6KFY7_MAIZE	54.206	2.05e-56	13	1	B_935
Et_10A_001384	10A	2545499	2559389	+	AT5G10530.1	52.022	6e-119	8	tr|A0A1D6KFY7|A0A1D6KFY7_MAIZE	67.733	9.83e-156	13	1	B_935
Et_10A_001389	10A	2550838	2559374	-	NA	NA	NA	NA	tr|A0A1D6NKJ6|A0A1D6NKJ6_MAIZE	37.9	1.08e-06	7	1	B_935
Et_10A_001390	10A	2561984	2566950	-	NA	NA	NA	NA	tr|B6SK37|B6SK37_MAIZE	41.667	0.01	5	1	B_935
Et_10A_002152	10A	2569907	2572142	+	AT1G29150.2	84.578	0	56	tr|B4FF65|B4FF65_MAIZE	95.775	0	57	1	B_935
Et_10A_002153	10A	2573084	2577674	+	AT1G29150.2	74.627	7.33e-25	4	tr|B4FF65|B4FF65_MAIZE	75.758	1.69e-24	4	1	B_935
Et_10A_001385	10A	2579378	2584277	+	AT1G48610.1	28.235	0.16	5	NA	NA	NA	NA	1	B_935
Et_10A_001391	10A	2580911	2584186	-	AT3G02540.2	51.724	5.1	2	tr|A0A1D6Q7Q7|A0A1D6Q7Q7_MAIZE	44.186	2.5	4	1	B_935
Et_10A_001394	10A	2587284	2592819	-	NA	NA	NA	NA	tr|A0A1D6JXJ8|A0A1D6JXJ8_MAIZE	38.182	3.2	3	1	B_935
Et_10A_002160	10A	2594016	2594570	-	AT5G17880.1	35	4.3	22	tr|A0A1D6I292|A0A1D6I292_MAIZE	30.526	7	46	1	B_935
Et_10A_001007	10A	20028593	20029817	-	AT4G10210.1	35.135	6.6	9	NA	NA	NA	NA	2	B_971
Et_10A_001003	10A	20030832	20033318	+	AT1G73820.1	74.545	9.01e-21	7	tr|B4FVM8|B4FVM8_MAIZE	83.636	9.07e-24	7	2	B_971
Et_10A_000252	10A	20043585	20043812	+	NA	NA	NA	NA	NA	NA	NA	NA	2	B_971
Et_10A_001008	10A	20089976	20092938	+	NA	NA	NA	NA	NA	NA	NA	NA	2	B_971
Et_10A_002041	10A	20111586	20116274	+	AT4G14368.1	83.333	3.43e-08	45	tr|K7VKT8|K7VKT8_MAIZE	50.746	5.69e-10	48	2	B_971
Et_10A_002041	10A	20111586	20116274	+	AT4G14368.1	83.333	3.43e-08	45	tr|K7VKT8|K7VKT8_MAIZE	83.647	0	48	2	B_971
Et_10A_002041	10A	20111586	20116274	+	AT4G14368.1	60.534	0	45	tr|K7VKT8|K7VKT8_MAIZE	50.746	5.69e-10	48	2	B_971
Et_10A_002041	10A	20111586	20116274	+	AT4G14368.1	60.534	0	45	tr|K7VKT8|K7VKT8_MAIZE	83.647	0	48	2	B_971
Et_10A_001009	10A	20118687	20120951	+	NA	NA	NA	NA	tr|K7ULJ3|K7ULJ3_MAIZE	26.606	5.6	13	2	B_971
Et_10A_001010	10A	20121887	20125341	+	NA	NA	NA	NA	NA	NA	NA	NA	2	B_971
Et_10A_001011	10A	20133588	20135457	+	AT2G33710.1	69.737	1.72e-28	12	tr|A0A1D6ITZ0|A0A1D6ITZ0_MAIZE	67.89	2.96e-28	16	2	B_971
Et_10A_001012	10A	20138637	20139098	-	NA	NA	NA	NA	NA	NA	NA	NA	2	B_971
Et_10A_001013	10A	20140964	20143944	-	AT4G34440.2	47.619	0.54	4	NA	NA	NA	NA	2	B_971
Et_10A_000053	10A	20148531	20149259	-	AT4G20850.1	30.282	0.1	51	NA	NA	NA	NA	2	B_971
Et_10A_000052	10A	20152414	20153602	+	AT3G26660.1	39.216	0.006	54	tr|C0P4U0|C0P4U0_MAIZE	40	3.3e-22	60	2	B_971
Et_10A_000052	10A	20152414	20153602	+	AT3G26660.1	37.705	3.01e-05	54	tr|C0P4U0|C0P4U0_MAIZE	43.939	3.25e-07	60	2	B_971
Et_10A_000052	10A	20152414	20153602	+	AT3G26660.1	39.216	0.006	54	tr|C0P4U0|C0P4U0_MAIZE	43.939	3.25e-07	60	2	B_971
Et_10A_000052	10A	20152414	20153602	+	AT3G26660.1	43.689	6.15e-24	54	tr|C0P4U0|C0P4U0_MAIZE	40	3.3e-22	60	2	B_971
Et_10A_000052	10A	20152414	20153602	+	AT3G26660.1	39.216	0.006	54	tr|C0P4U0|C0P4U0_MAIZE	41.176	0.21	60	2	B_971
Et_10A_000052	10A	20152414	20153602	+	AT3G26660.1	37.705	3.01e-05	54	tr|C0P4U0|C0P4U0_MAIZE	40	3.3e-22	60	2	B_971
Et_10A_000052	10A	20152414	20153602	+	AT3G26660.1	37.705	3.01e-05	54	tr|C0P4U0|C0P4U0_MAIZE	41.176	0.21	60	2	B_971
Et_10A_000052	10A	20152414	20153602	+	AT3G26660.1	43.689	6.15e-24	54	tr|C0P4U0|C0P4U0_MAIZE	41.176	0.21	60	2	B_971
Et_10A_000052	10A	20152414	20153602	+	AT3G26660.1	43.689	6.15e-24	54	tr|C0P4U0|C0P4U0_MAIZE	43.939	3.25e-07	60	2	B_971
Et_10A_001014	10A	20167111	20169456	-	NA	NA	NA	NA	NA	NA	NA	NA	2	B_971
Et_10A_001015	10A	20170527	20173961	+	NA	NA	NA	NA	tr|A0A1D6P9I2|A0A1D6P9I2_MAIZE	58.333	3.7	2	2	B_971
Et_10A_001016	10A	20181835	20191136	+	NA	NA	NA	NA	tr|A0A1D6MZ04|A0A1D6MZ04_MAIZE	40.331	7.34e-99	28	2	B_971
Et_10A_001016	10A	20181835	20191136	+	NA	NA	NA	NA	tr|A0A1D6MZ04|A0A1D6MZ04_MAIZE	58.427	5.67e-14	28	2	B_971
Et_1A_008323	1A	6414281	6419959	-	NA	NA	NA	NA	NA	NA	NA	NA	6	B_12
Et_1A_008324	1A	6423604	6426483	-	NA	NA	NA	NA	NA	NA	NA	NA	6	B_12
Et_1A_009483	1A	6427528	6427839	+	AT2G15880.1	43.243	0.84	30	NA	NA	NA	NA	6	B_12
Et_1A_004800	1A	6430683	6431268	-	AT5G56550.1	50.685	1.89e-14	34	tr|B4FF60|B4FF60_MAIZE	72.34	1.04e-52	71	6	B_12
Et_1A_009484	1A	6430855	6431403	+	NA	NA	NA	NA	NA	NA	NA	NA	6	B_12
Et_1A_008325	1A	6432445	6435708	-	AT3G13290.1	35.714	6	4	NA	NA	NA	NA	6	B_12
Et_1A_008322	1A	6441277	6444847	+	AT2G03770.1	42.073	2.1e-34	14	tr|A0A1D6Q726|A0A1D6Q726_MAIZE	58.621	4.3e-56	14	6	B_12
Et_1A_009486	1A	6447577	6452085	-	AT5G36950.1	25.49	0.7	10	NA	NA	NA	NA	6	B_12
Et_1A_008326	1A	6452460	6459655	-	NA	NA	NA	NA	tr|A0A1D6PMS2|A0A1D6PMS2_MAIZE	32.203	7.6	2	6	B_12
Et_1A_009487	1A	6460550	6462349	-	NA	NA	NA	NA	NA	NA	NA	NA	6	B_12
Et_1A_009488	1A	6466573	6466776	-	AT3G15800.1	31.818	2.7	66	tr|A0A1D6E276|A0A1D6E276_MAIZE	48	2	37	6	B_12
Et_1A_009485	1A	6484967	6486214	+	NA	NA	NA	NA	NA	NA	NA	NA	6	B_12
Et_1A_009489	1A	6494338	6495217	-	AT2G01560.1	25.556	7.5	30	tr|A0A1D6L8J6|A0A1D6L8J6_MAIZE	26.712	0.75	47	6	B_12
Et_1A_008327	1A	6498214	6499981	+	AT1G61570.1	76.596	3.25e-12	8	tr|B4FYN0|B4FYN0_MAIZE	88	4.64e-17	8	6	B_12
Et_1A_008328	1A	6500785	6504555	+	NA	NA	NA	NA	NA	NA	NA	NA	6	B_12
Et_1A_009490	1A	6507022	6507564	+	NA	NA	NA	NA	NA	NA	NA	NA	6	B_12
Et_1A_008330	1A	6509335	6515100	-	NA	NA	NA	NA	NA	NA	NA	NA	6	B_12
Et_1A_009491	1A	6537079	6538974	+	NA	NA	NA	NA	NA	NA	NA	NA	6	B_12
Et_1A_008331	1A	6540571	6543431	-	AT5G17600.1	27.737	4.4	14	tr|A0A1D6ME27|A0A1D6ME27_MAIZE	34.483	1.8	6	6	B_12
Et_1A_008329	1A	6570760	6574758	+	AT4G38230.1	77.333	8.02e-33	11	tr|A0A1D6JBQ1|A0A1D6JBQ1_MAIZE	33.333	0.58	11	6	B_12
Et_1A_008329	1A	6570760	6574758	+	AT4G38230.1	76.471	9.27e-11	11	tr|A0A1D6JBQ1|A0A1D6JBQ1_MAIZE	78.947	4.25e-11	11	6	B_12
Et_1A_008329	1A	6570760	6574758	+	AT4G38230.1	77.333	8.02e-33	11	tr|A0A1D6JBQ1|A0A1D6JBQ1_MAIZE	78.947	4.25e-11	11	6	B_12
Et_1A_008329	1A	6570760	6574758	+	AT4G38230.1	77.333	8.02e-33	11	tr|A0A1D6JBQ1|A0A1D6JBQ1_MAIZE	78.125	7.05e-08	11	6	B_12
Et_1A_008329	1A	6570760	6574758	+	AT4G38230.1	76.471	9.27e-11	11	tr|A0A1D6JBQ1|A0A1D6JBQ1_MAIZE	97.333	4.17e-43	11	6	B_12
Et_1A_008329	1A	6570760	6574758	+	AT4G38230.1	77.333	8.02e-33	11	tr|A0A1D6JBQ1|A0A1D6JBQ1_MAIZE	97.333	4.17e-43	11	6	B_12
Et_1A_008329	1A	6570760	6574758	+	AT4G38230.1	76.471	9.27e-11	11	tr|A0A1D6JBQ1|A0A1D6JBQ1_MAIZE	78.125	7.05e-08	11	6	B_12
Et_1A_008329	1A	6570760	6574758	+	AT4G38230.1	81.25	1.71e-08	11	tr|A0A1D6JBQ1|A0A1D6JBQ1_MAIZE	33.333	0.58	11	6	B_12
Et_1A_008329	1A	6570760	6574758	+	AT4G38230.1	33.333	9.8	11	tr|A0A1D6JBQ1|A0A1D6JBQ1_MAIZE	97.333	4.17e-43	11	6	B_12
Et_1A_008329	1A	6570760	6574758	+	AT4G38230.1	76.471	9.27e-11	11	tr|A0A1D6JBQ1|A0A1D6JBQ1_MAIZE	33.333	0.58	11	6	B_12
Et_1A_008329	1A	6570760	6574758	+	AT4G38230.1	81.25	1.71e-08	11	tr|A0A1D6JBQ1|A0A1D6JBQ1_MAIZE	78.125	7.05e-08	11	6	B_12
Et_1A_008329	1A	6570760	6574758	+	AT4G38230.1	33.333	9.8	11	tr|A0A1D6JBQ1|A0A1D6JBQ1_MAIZE	78.947	4.25e-11	11	6	B_12
Et_1A_008329	1A	6570760	6574758	+	AT4G38230.1	81.25	1.71e-08	11	tr|A0A1D6JBQ1|A0A1D6JBQ1_MAIZE	78.947	4.25e-11	11	6	B_12
Et_1A_008329	1A	6570760	6574758	+	AT4G38230.1	33.333	9.8	11	tr|A0A1D6JBQ1|A0A1D6JBQ1_MAIZE	33.333	0.58	11	6	B_12
Et_1A_008329	1A	6570760	6574758	+	AT4G38230.1	33.333	9.8	11	tr|A0A1D6JBQ1|A0A1D6JBQ1_MAIZE	78.125	7.05e-08	11	6	B_12
Et_1A_008329	1A	6570760	6574758	+	AT4G38230.1	81.25	1.71e-08	11	tr|A0A1D6JBQ1|A0A1D6JBQ1_MAIZE	97.333	4.17e-43	11	6	B_12
Et_1A_004801	1A	6584428	6585021	+	AT5G40940.1	45.455	5.2	15	NA	NA	NA	NA	6	B_12
Et_1A_008334	1A	6600747	6602039	-	NA	NA	NA	NA	NA	NA	NA	NA	6	B_12
Et_1A_009492	1A	6633676	6641355	+	AT3G24255.5	25	0.3	11	tr|A0A1D6IPM0|A0A1D6IPM0_MAIZE	30.769	7.52e-06	14	6	B_12
Et_1A_009492	1A	6633676	6641355	+	AT3G24255.5	30.405	5.11e-14	11	tr|A0A1D6IPM0|A0A1D6IPM0_MAIZE	29.688	1.14e-33	14	6	B_12
Et_1A_009492	1A	6633676	6641355	+	AT3G24255.5	30.405	5.11e-14	11	tr|A0A1D6IPM0|A0A1D6IPM0_MAIZE	30.769	7.52e-06	14	6	B_12
Et_1A_009492	1A	6633676	6641355	+	AT3G24255.5	25	0.3	11	tr|A0A1D6IPM0|A0A1D6IPM0_MAIZE	29.688	1.14e-33	14	6	B_12
Et_1A_009493	1A	6655112	6655708	+	NA	NA	NA	NA	NA	NA	NA	NA	6	B_12
Et_1A_009494	1A	6657765	6663383	+	AT1G80350.1	30.435	0.017	6	NA	NA	NA	NA	6	B_12
Et_1A_008335	1A	6659622	6664290	-	AT4G29310.1	40	3.7	2	NA	NA	NA	NA	6	B_12
Et_1A_008332	1A	6667245	6670917	+	AT3G09600.9	55.556	2.3	10	tr|A0A1D6Q708|A0A1D6Q708_MAIZE	86.538	9.63e-23	6	6	B_12
Et_1A_008332	1A	6667245	6670917	+	AT3G09600.9	90	0.000368	10	tr|A0A1D6Q708|A0A1D6Q708_MAIZE	86.538	9.63e-23	6	6	B_12
Et_1A_008332	1A	6667245	6670917	+	AT3G09600.9	93.023	5.91e-21	10	tr|A0A1D6Q708|A0A1D6Q708_MAIZE	95	0.000111	6	6	B_12
Et_1A_008332	1A	6667245	6670917	+	AT3G09600.9	64.865	1.12e-10	10	tr|A0A1D6Q708|A0A1D6Q708_MAIZE	95	0.000111	6	6	B_12
Et_1A_008332	1A	6667245	6670917	+	AT3G09600.9	93.023	5.91e-21	10	tr|A0A1D6Q708|A0A1D6Q708_MAIZE	86.538	9.63e-23	6	6	B_12
Et_1A_008332	1A	6667245	6670917	+	AT3G09600.9	90	0.000368	10	tr|A0A1D6Q708|A0A1D6Q708_MAIZE	95	0.000111	6	6	B_12
Et_1A_008332	1A	6667245	6670917	+	AT3G09600.9	64.865	1.12e-10	10	tr|A0A1D6Q708|A0A1D6Q708_MAIZE	86.538	9.63e-23	6	6	B_12
Et_1A_008332	1A	6667245	6670917	+	AT3G09600.9	55.556	2.3	10	tr|A0A1D6Q708|A0A1D6Q708_MAIZE	95	0.000111	6	6	B_12
Et_1A_008333	1A	6673874	6675742	+	AT1G63970.2	72.549	2.92e-18	8	tr|A0A1D6Q704|A0A1D6Q704_MAIZE	70.455	1.8e-43	20	6	B_12
Et_1A_008336	1A	6679168	6679601	-	AT2G46210.1	37.838	5.1	26	NA	NA	NA	NA	6	B_12
Et_1A_009495	1A	6679840	6683191	-	AT4G36470.1	34	5.7	4	NA	NA	NA	NA	6	B_12
Et_1A_008337	1A	6683736	6688603	-	NA	NA	NA	NA	NA	NA	NA	NA	6	B_12
Et_1A_009496	1A	6692164	6693036	-	AT5G03560.4	24.096	6.8	29	NA	NA	NA	NA	6	B_12
Et_1A_009497	1A	6695708	6696067	-	AT2G27150.2	31.884	6.4	49	tr|A0A1D6FYD7|A0A1D6FYD7_MAIZE	41.935	0.038	26	6	B_12
Et_1A_008339	1A	6697196	6699684	-	NA	NA	NA	NA	NA	NA	NA	NA	6	B_12
Et_1A_009498	1A	6702323	6705974	+	NA	NA	NA	NA	NA	NA	NA	NA	6	B_12
Et_1A_009499	1A	6707137	6708087	-	AT2G43040.2	25.641	6.1	25	NA	NA	NA	NA	6	B_12
Et_1A_008340	1A	6710433	6713123	-	AT5G38830.1	42.105	0.45	6	NA	NA	NA	NA	6	B_12
Et_1A_008341	1A	6715103	6717232	-	AT3G09180.3	33.636	0.47	14	NA	NA	NA	NA	6	B_12
Et_1A_008342	1A	6721479	6724937	-	NA	NA	NA	NA	tr|A0A1D6J2Z5|A0A1D6J2Z5_MAIZE	29.508	3.4	5	6	B_12
Et_1A_008343	1A	6731660	6736092	-	AT5G63595.1	35	3.3	3	tr|A0A1D6NSA6|A0A1D6NSA6_MAIZE	33.803	2.4	4	6	B_12
Et_1A_008338	1A	6738990	6740154	+	AT5G62140.1	59.551	1.32e-28	23	tr|K7U311|K7U311_MAIZE	93.182	2.7e-52	23	6	B_12
Et_1A_008344	1A	6750391	6761112	-	AT3G16940.2	30.488	0.21	2	NA	NA	NA	NA	6	B_12
Et_1A_008345	1A	6767101	6770290	-	AT2G25409.1	32.099	0.000126	7	tr|A0A1D6MA72|A0A1D6MA72_MAIZE	35.366	4.9	7	6	B_12
Et_1A_009500	1A	6778967	6780682	-	AT5G65950.1	26.923	4.9	13	tr|A0A1D6H0V3|A0A1D6H0V3_MAIZE	41.304	2.3	8	6	B_12
Et_1A_008351	1A	6787087	6793671	-	NA	NA	NA	NA	tr|Q6R9A5|Q6R9A5_MAIZE	85.714	0.004	1	6	B_12
Et_1A_008352	1A	6796692	6799124	-	NA	NA	NA	NA	tr|A0A1D6DZL0|A0A1D6DZL0_MAIZE	26.957	0.84	13	6	B_12
Et_1A_009501	1A	6807122	6810409	+	AT1G26150.1	35.821	7.8	6	NA	NA	NA	NA	6	B_12
Et_1A_008346	1A	6814337	6816341	+	NA	NA	NA	NA	NA	NA	NA	NA	6	B_12
Et_1A_008347	1A	6816343	6816723	+	AT4G00295.1	36.364	7.2	21	NA	NA	NA	NA	6	B_12
Et_1A_008348	1A	6822311	6825744	+	AT1G12740.3	44.872	1.61e-33	16	tr|A0A1D6HFU5|A0A1D6HFU5_MAIZE	100	1.07e-20	20	6	B_12
Et_1A_008348	1A	6822311	6825744	+	AT1G12740.3	66.667	0.000603	16	tr|A0A1D6HFU5|A0A1D6HFU5_MAIZE	60.87	9.71e-48	20	6	B_12
Et_1A_008348	1A	6822311	6825744	+	AT1G12740.3	44.872	1.61e-33	16	tr|A0A1D6HFU5|A0A1D6HFU5_MAIZE	92.857	2.81e-07	20	6	B_12
Et_1A_008348	1A	6822311	6825744	+	AT1G12740.3	66.667	0.000603	16	tr|A0A1D6HFU5|A0A1D6HFU5_MAIZE	92.857	2.81e-07	20	6	B_12
Et_1A_008348	1A	6822311	6825744	+	AT1G12740.3	44.872	1.61e-33	16	tr|A0A1D6HFU5|A0A1D6HFU5_MAIZE	60.87	9.71e-48	20	6	B_12
Et_1A_008348	1A	6822311	6825744	+	AT1G12740.3	66.667	0.000603	16	tr|A0A1D6HFU5|A0A1D6HFU5_MAIZE	100	1.07e-20	20	6	B_12
Et_1A_004802	1A	6827445	6827759	+	AT3G24780.1	66.667	2.7	12	tr|A0A1D6IRT5|A0A1D6IRT5_MAIZE	61.111	1.2	17	6	B_12
Et_1A_008349	1A	6856888	6861850	+	AT3G61150.1	33.333	0.4	10	tr|A0A1D6MN23|A0A1D6MN23_MAIZE	91.597	7.64e-56	10	6	B_12
Et_1A_008349	1A	6856888	6861850	+	AT3G61150.1	71.212	1.77e-43	10	tr|A0A1D6MN23|A0A1D6MN23_MAIZE	91.597	7.64e-56	10	6	B_12
Et_1A_008349	1A	6856888	6861850	+	AT3G61150.1	71.212	1.77e-43	10	tr|A0A1D6MN23|A0A1D6MN23_MAIZE	80.488	2.06e-12	10	6	B_12
Et_1A_008349	1A	6856888	6861850	+	AT3G61150.1	33.333	0.4	10	tr|A0A1D6MN23|A0A1D6MN23_MAIZE	80.488	2.06e-12	10	6	B_12
Et_1A_008350	1A	6864613	6868200	+	NA	NA	NA	NA	tr|A0A1D6HFU1|A0A1D6HFU1_MAIZE	63.793	8.19e-12	5	6	B_12
Et_1A_009502	1A	6870583	6870873	+	AT3G04250.1	36.111	1.2	38	NA	NA	NA	NA	6	B_12
Et_1A_009503	1A	6887328	6888425	+	NA	NA	NA	NA	NA	NA	NA	NA	6	B_12
Et_1A_008355	1A	6892714	6897516	-	NA	NA	NA	NA	NA	NA	NA	NA	6	B_12
Et_1A_008356	1A	6898626	6903587	-	NA	NA	NA	NA	NA	NA	NA	NA	6	B_12
Et_1A_005345	1A	6909643	6909909	+	AT5G04530.1	68.421	0.56	19	tr|A0A1D6K4K4|A0A1D6K4K4_MAIZE	70	0.28	20	6	B_12
Et_1A_009504	1A	6909938	6910477	+	AT1G03060.4	32.258	1.7	32	NA	NA	NA	NA	6	B_12
Et_1A_009505	1A	6917572	6919262	+	AT3G59680.2	37.288	1.8	10	NA	NA	NA	NA	6	B_12
Et_1A_008357	1A	6921892	6923571	-	AT1G69770.1	42.308	4.2	5	NA	NA	NA	NA	6	B_12
Et_1A_009507	1A	6924649	6925134	-	AT1G72250.1	30.508	5.3	36	tr|A0A1D6Q6V2|A0A1D6Q6V2_MAIZE	88.571	1.94e-11	19	6	B_12
Et_1A_008353	1A	6925195	6928635	+	AT1G64630.1	67.816	4.27e-31	8	tr|A0A1D6HFR5|A0A1D6HFR5_MAIZE	92.105	9.92e-41	7	6	B_12
Et_1A_006400	1A	21914828	21920752	+	AT2G47310.1	26.316	1.2	5	tr|A0A1D6K728|A0A1D6K728_MAIZE	77.778	0.56	1	1	B_49
Et_1A_006399	1A	21926070	21926923	-	NA	NA	NA	NA	NA	NA	NA	NA	1	B_49
Et_1A_004595	1A	21927279	21928730	-	NA	NA	NA	NA	NA	NA	NA	NA	1	B_49
Et_1A_004993	1A	21929135	21929955	+	NA	NA	NA	NA	NA	NA	NA	NA	1	B_49
Et_1A_004994	1A	21940930	21941163	+	ATMG00510.1	92.857	0.17	18	tr|K7V9Q3|K7V9Q3_MAIZE	100	0.000372	22	1	B_49
Et_1A_004996	1A	21941260	21941442	-	AT1G22275.2	41.667	0.23	40	tr|A0A1D6MQS8|A0A1D6MQS8_MAIZE	38.776	2.3	80	1	B_49
Et_1A_004593	1A	21942630	21942920	+	AT1G07390.4	43.243	1.7	36	NA	NA	NA	NA	1	B_49
Et_1A_004997	1A	21944340	21944564	-	AT4G02070.1	26.667	6.2	69	NA	NA	NA	NA	1	B_49
Et_1A_004594	1A	21945287	21945559	-	AT3G57580.1	45	3.1	22	tr|Q6R9H4|Q6R9H4_MAIZE	92.308	4.36e-11	29	1	B_49
Et_1A_004998	1A	21945790	21945828	-	NA	NA	NA	NA	NA	NA	NA	NA	1	B_49
Et_1A_004999	1A	21952881	21953012	-	AT2G29910.7	37.931	7.7	67	tr|A0A1D6K5Q2|A0A1D6K5Q2_MAIZE	31.429	8.4	81	1	B_49
Et_1A_006401	1A	21953104	21955735	+	AT1G08410.1	88.235	5.75e-12	4	tr|A0A1D6KGE5|A0A1D6KGE5_MAIZE	90.909	6.8e-12	4	1	B_49
Et_1A_006402	1A	21958424	21959925	+	NA	NA	NA	NA	NA	NA	NA	NA	1	B_49
Et_1A_006394	1A	21963580	21965956	+	ATCG00170.1	35.714	1.3	7	tr|A0A1D6P2S7|A0A1D6P2S7_MAIZE	58.48	2.46e-64	21	1	B_49
Et_1A_005000	1A	21966645	21966782	-	NA	NA	NA	NA	NA	NA	NA	NA	1	B_49
Et_1A_006395	1A	21979134	21983523	+	AT1G27460.2	53.191	2.55e-24	6	tr|C0HDX4|C0HDX4_MAIZE	51.584	3.25e-49	14	1	B_49
Et_1A_006396	1A	21983569	21983934	+	NA	NA	NA	NA	NA	NA	NA	NA	1	B_49
Et_1A_005001	1A	21984672	21984764	-	NA	NA	NA	NA	NA	NA	NA	NA	1	B_49
Et_1A_004995	1A	21989401	21989451	+	NA	NA	NA	NA	NA	NA	NA	NA	1	B_49
Et_1A_006414	1A	21994380	21994868	+	NA	NA	NA	NA	NA	NA	NA	NA	1	B_49
Et_1A_004596	1A	21995600	21995919	-	AT1G36180.1	34.615	0.95	45	tr|C0P8C7|C0P8C7_MAIZE	35.714	9.9	37	1	B_49
Et_1A_004600	1A	21998226	21998552	+	AT1G62190.1	34.091	2.2	41	NA	NA	NA	NA	1	B_49
Et_1A_008969	1A	22002144	22005374	-	ATCG00530.1	61.135	4.03e-85	21	sp|P46641|CEMA_MAIZE	97.391	2.44e-153	21	1	B_49
Et_1A_005009	1A	22005613	22005792	-	NA	NA	NA	NA	NA	NA	NA	NA	1	B_49
Et_1A_006421	1A	22006975	22007747	-	NA	NA	NA	NA	NA	NA	NA	NA	1	B_49
Et_1A_005010	1A	22008321	22008371	-	AT3G44770.1	53.846	3.1	81	NA	NA	NA	NA	1	B_49
Et_1A_006422	1A	22008458	22008961	-	NA	NA	NA	NA	NA	NA	NA	NA	1	B_49
Et_1A_005015	1A	22009237	22009350	+	NA	NA	NA	NA	NA	NA	NA	NA	1	B_49
Et_1A_005016	1A	22010140	22010268	+	NA	NA	NA	NA	NA	NA	NA	NA	1	B_49
Et_1A_005017	1A	22010772	22010972	+	NA	NA	NA	NA	NA	NA	NA	NA	1	B_49
Et_1A_004601	1A	22011238	22011729	+	AT1G18630.1	33.333	9.3	33	NA	NA	NA	NA	1	B_49
Et_1A_006423	1A	22011961	22012317	-	NA	NA	NA	NA	NA	NA	NA	NA	1	B_49
Et_1A_004597	1A	22014351	22015001	-	AT5G52810.1	40	3.6	19	tr|B6SM77|B6SM77_MAIZE	29.508	1.3	28	1	B_49
Et_1A_006415	1A	22015503	22017036	+	ATCG00680.1	96.26	0	99	sp|P05641|PSBB_MAIZE	99.606	0	99	1	B_49
Et_1A_006416	1A	22017183	22017562	+	NA	NA	NA	NA	tr|A0A1D6IMY2|A0A1D6IMY2_MAIZE	45.455	6.2	17	1	B_49
Et_1A_006417	1A	22017572	22018055	+	NA	NA	NA	NA	NA	NA	NA	NA	1	B_49
Et_1A_004602	1A	22018633	22019331	+	NA	NA	NA	NA	NA	NA	NA	NA	1	B_49
Et_1A_004603	1A	22020214	22020738	+	NA	NA	NA	NA	NA	NA	NA	NA	1	B_49
Et_1A_006424	1A	22020952	22023628	-	NA	NA	NA	NA	NA	NA	NA	NA	1	B_49
Et_1A_004598	1A	22023768	22024082	-	AT5G67030.1	52.941	7.2	16	NA	NA	NA	NA	1	B_49
Et_1A_005003	1A	22024763	22024795	+	NA	NA	NA	NA	NA	NA	NA	NA	1	B_49
Et_1A_005002	1A	22024959	22025724	+	AT1G27690.1	30.645	7	24	tr|A0A1D6DSQ8|A0A1D6DSQ8_MAIZE	31.646	3.5	30	1	B_49
Et_1A_006425	1A	22025847	22026153	-	AT5G09540.1	35.294	6.4	33	NA	NA	NA	NA	1	B_49
Et_1A_005004	1A	22026846	22026983	+	AT3G48190.3	34.146	4.3	91	NA	NA	NA	NA	1	B_49
Et_1A_006418	1A	22027047	22027374	+	AT2G47920.2	25.373	2.6	50	tr|A0A1D6E1X2|A0A1D6E1X2_MAIZE	33.333	2.7	48	1	B_49
Et_1A_006426	1A	22027459	22027929	-	AT4G27595.2	30.645	3.7	37	tr|A0A1D6E8L7|A0A1D6E8L7_MAIZE	34.177	0.7	49	1	B_49
Et_1A_005005	1A	22027974	22028027	+	NA	NA	NA	NA	NA	NA	NA	NA	1	B_49
Et_1A_004599	1A	22028553	22028903	-	NA	NA	NA	NA	NA	NA	NA	NA	1	B_49
Et_1A_006427	1A	22035064	22035386	-	AT4G16070.2	30	5.8	37	NA	NA	NA	NA	1	B_49
Et_1A_006428	1A	22038118	22038594	-	NA	NA	NA	NA	tr|A0A1D6N0P5|A0A1D6N0P5_MAIZE	60	7.8	13	1	B_49
Et_1A_006429	1A	22038696	22039256	-	AT4G34160.1	33.784	0.27	37	tr|K7U3U3|K7U3U3_MAIZE	30.357	5.8	30	1	B_49
Et_1A_004604	1A	22045207	22046638	+	NA	NA	NA	NA	NA	NA	NA	NA	1	B_49
Et_1A_006419	1A	22060788	22061000	+	AT5G43080.1	25.641	4.2	56	NA	NA	NA	NA	1	B_49
Et_1A_005011	1A	22061932	22062126	-	AT2G26870.1	57.143	0.045	33	tr|A0A1D6L062|A0A1D6L062_MAIZE	35.294	2.4	53	1	B_49
Et_1A_005006	1A	22065597	22066142	+	NA	NA	NA	NA	tr|B7ZZR7|B7ZZR7_MAIZE	40	1.2	26	1	B_49
Et_1A_005007	1A	22075964	22076029	+	AT1G19250.1	47.059	2	81	tr|A0A1D6IIM7|A0A1D6IIM7_MAIZE	47.059	4.9	81	1	B_49
Et_1A_006430	1A	22078018	22078798	-	NA	NA	NA	NA	NA	NA	NA	NA	1	B_49
Et_1A_005012	1A	22079426	22079485	-	NA	NA	NA	NA	NA	NA	NA	NA	1	B_49
Et_1A_008968	1A	22080513	22081571	+	AT5G10370.1	34.146	8.6	12	NA	NA	NA	NA	1	B_49
Et_1A_005013	1A	22083669	22083701	-	NA	NA	NA	NA	NA	NA	NA	NA	1	B_49
Et_1A_005014	1A	22085321	22085536	-	AT1G08280.1	33.333	0.82	59	tr|A0A1D6I1E9|A0A1D6I1E9_MAIZE	32.075	0.65	73	1	B_49
Et_1A_005008	1A	22085698	22085832	+	NA	NA	NA	NA	NA	NA	NA	NA	1	B_49
Et_1A_006433	1A	22087834	22088207	-	AT3G09800.3	43.59	3.7	31	NA	NA	NA	NA	1	B_49
Et_1A_006420	1A	22088173	22088474	+	AT4G40000.2	35	1.1	40	tr|A0A1D6E9W4|A0A1D6E9W4_MAIZE	35.417	7.6	48	1	B_49
Et_1A_006434	1A	22088626	22089651	-	NA	NA	NA	NA	NA	NA	NA	NA	1	B_49
Et_1A_005022	1A	22090680	22090934	-	AT3G50670.1	41.935	2.5	37	NA	NA	NA	NA	1	B_49
Et_1A_005018	1A	22092140	22092184	+	AT4G15720.1	53.846	1.9	93	NA	NA	NA	NA	1	B_49
Et_1A_005023	1A	22092386	22092756	-	AT3G45630.2	47.368	6.3	29	tr|A0A1D6QI32|A0A1D6QI32_MAIZE	58.621	3.7	23	1	B_49
Et_1A_004605	1A	22092887	22093153	+	NA	NA	NA	NA	NA	NA	NA	NA	1	B_49
Et_1A_005019	1A	22095696	22095851	+	NA	NA	NA	NA	NA	NA	NA	NA	1	B_49
Et_1A_005024	1A	22097678	22097866	-	NA	NA	NA	NA	NA	NA	NA	NA	1	B_49
Et_1A_005025	1A	22104425	22104571	-	AT1G34560.1	36.585	3	85	tr|A0A1D6MK23|A0A1D6MK23_MAIZE	26.667	9.7	63	1	B_49
Et_1A_004606	1A	22110110	22110400	-	AT3G46930.1	32.692	6.1	49	tr|K7UBK7|K7UBK7_MAIZE	42.857	1	29	1	B_49
Et_1A_006435	1A	22111614	22112243	-	NA	NA	NA	NA	NA	NA	NA	NA	1	B_49
Et_1A_004607	1A	22112737	22113279	-	NA	NA	NA	NA	NA	NA	NA	NA	1	B_49
Et_1A_006431	1A	22120829	22128962	+	AT5G65750.1	40.476	0.017	6	tr|A0A1D6LLS4|A0A1D6LLS4_MAIZE	60	3.8e-05	6	1	B_49
Et_1A_006431	1A	22120829	22128962	+	AT5G65750.1	40.476	0.017	6	tr|A0A1D6LLS4|A0A1D6LLS4_MAIZE	80.435	4.27e-17	6	1	B_49
Et_1A_006431	1A	22120829	22128962	+	AT5G65750.1	74.667	1.48e-26	6	tr|A0A1D6LLS4|A0A1D6LLS4_MAIZE	60	3.8e-05	6	1	B_49
Et_1A_006431	1A	22120829	22128962	+	AT5G65750.1	74.667	1.48e-26	6	tr|A0A1D6LLS4|A0A1D6LLS4_MAIZE	80.435	4.27e-17	6	1	B_49
Et_1A_006431	1A	22120829	22128962	+	AT5G65750.1	40.476	0.017	6	tr|A0A1D6LLS4|A0A1D6LLS4_MAIZE	85.714	6.74e-32	6	1	B_49
Et_1A_006431	1A	22120829	22128962	+	AT5G65750.1	78.261	6.27e-17	6	tr|A0A1D6LLS4|A0A1D6LLS4_MAIZE	85.714	6.74e-32	6	1	B_49
Et_1A_006431	1A	22120829	22128962	+	AT5G65750.1	78.261	6.27e-17	6	tr|A0A1D6LLS4|A0A1D6LLS4_MAIZE	60	3.8e-05	6	1	B_49
Et_1A_006431	1A	22120829	22128962	+	AT5G65750.1	74.667	1.48e-26	6	tr|A0A1D6LLS4|A0A1D6LLS4_MAIZE	85.714	6.74e-32	6	1	B_49
Et_1A_006431	1A	22120829	22128962	+	AT5G65750.1	78.261	6.27e-17	6	tr|A0A1D6LLS4|A0A1D6LLS4_MAIZE	80.435	4.27e-17	6	1	B_49
Et_1A_006436	1A	22129953	22135179	-	AT3G26400.1	32.051	2	4	tr|A0A1D6KLZ3|A0A1D6KLZ3_MAIZE	33.333	0.002	7	1	B_49
Et_1A_005020	1A	22141398	22141460	+	NA	NA	NA	NA	NA	NA	NA	NA	1	B_49
Et_1A_005021	1A	22143435	22144781	+	NA	NA	NA	NA	NA	NA	NA	NA	1	B_49
Et_1A_004608	1A	22148266	22150215	-	NA	NA	NA	NA	NA	NA	NA	NA	1	B_49
Et_1A_006432	1A	22157137	22164990	+	AT4G12610.1	59.459	8.95e-26	4	tr|A0A1D6GSA6|A0A1D6GSA6_MAIZE	91.935	3.59e-66	5	1	B_49
Et_1A_006437	1A	22170599	22175282	-	NA	NA	NA	NA	NA	NA	NA	NA	1	B_49
Et_1A_006438	1A	22178011	22183845	-	NA	NA	NA	NA	tr|A0A1D6F6R9|A0A1D6F6R9_MAIZE	27.049	0.003	6	1	B_49
Et_1A_006441	1A	22191714	22193218	-	AT1G18270.4	25.676	7.1	15	tr|A0A1D6HXI2|A0A1D6HXI2_MAIZE	28.571	7.8	13	1	B_49
Et_1A_004609	1A	22195247	22195990	+	NA	NA	NA	NA	NA	NA	NA	NA	1	B_49
Et_1A_005026	1A	22212424	22213243	+	AT5G09850.5	32.203	0.23	22	tr|A0A1D6FQ63|A0A1D6FQ63_MAIZE	43.038	1.99e-06	27	1	B_49
Et_1A_005028	1A	22213736	22214068	-	AT4G34030.1	29.167	1.4	44	NA	NA	NA	NA	1	B_49
Et_1A_005027	1A	22216532	22216828	+	AT5G18700.1	29.231	5.9	66	NA	NA	NA	NA	1	B_49
Et_1A_006439	1A	22216999	22217257	+	AT2G33420.1	34.375	1.8	36	tr|K7TSH2|K7TSH2_MAIZE	41.935	0.41	36	1	B_49
Et_1A_006442	1A	22218571	22228380	-	NA	NA	NA	NA	NA	NA	NA	NA	1	B_49
Et_1A_006440	1A	22232140	22243205	+	AT4G36290.1	72	0.002	7	tr|A0A1D6J0Q1|A0A1D6J0Q1_MAIZE	50	1.29e-08	8	1	B_49
Et_1A_006440	1A	22232140	22243205	+	AT4G36290.1	72	0.002	7	tr|A0A1D6J0Q1|A0A1D6J0Q1_MAIZE	71.429	7.11e-07	8	1	B_49
Et_1A_006440	1A	22232140	22243205	+	AT4G36290.1	66.667	4.94e-09	7	tr|A0A1D6J0Q1|A0A1D6J0Q1_MAIZE	77.419	4.7e-06	8	1	B_49
Et_1A_006440	1A	22232140	22243205	+	AT4G36290.1	66.667	4.94e-09	7	tr|A0A1D6J0Q1|A0A1D6J0Q1_MAIZE	50	1.29e-08	8	1	B_49
Et_1A_006440	1A	22232140	22243205	+	AT4G36290.1	72	0.002	7	tr|A0A1D6J0Q1|A0A1D6J0Q1_MAIZE	82.609	2.85e-05	8	1	B_49
Et_1A_006440	1A	22232140	22243205	+	AT4G36290.1	72	0.002	7	tr|A0A1D6J0Q1|A0A1D6J0Q1_MAIZE	85.714	1.63e-21	8	1	B_49
Et_1A_006440	1A	22232140	22243205	+	AT4G36290.1	66.667	4.94e-09	7	tr|A0A1D6J0Q1|A0A1D6J0Q1_MAIZE	48.98	1.86e-17	8	1	B_49
Et_1A_006440	1A	22232140	22243205	+	AT4G36290.1	42.857	1.12e-13	7	tr|A0A1D6J0Q1|A0A1D6J0Q1_MAIZE	85.714	1.63e-21	8	1	B_49
Et_1A_006440	1A	22232140	22243205	+	AT4G36290.1	45.455	6.08e-08	7	tr|A0A1D6J0Q1|A0A1D6J0Q1_MAIZE	48.98	1.86e-17	8	1	B_49
Et_1A_006440	1A	22232140	22243205	+	AT4G36290.1	66.667	4.94e-09	7	tr|A0A1D6J0Q1|A0A1D6J0Q1_MAIZE	82.609	2.85e-05	8	1	B_49
Et_1A_006440	1A	22232140	22243205	+	AT4G36290.1	45.455	6.08e-08	7	tr|A0A1D6J0Q1|A0A1D6J0Q1_MAIZE	71.429	7.11e-07	8	1	B_49
Et_1A_006440	1A	22232140	22243205	+	AT4G36290.1	42.857	1.12e-13	7	tr|A0A1D6J0Q1|A0A1D6J0Q1_MAIZE	77.419	4.7e-06	8	1	B_49
Et_1A_006440	1A	22232140	22243205	+	AT4G36290.1	73.077	0.023	7	tr|A0A1D6J0Q1|A0A1D6J0Q1_MAIZE	77.419	4.7e-06	8	1	B_49
Et_1A_006440	1A	22232140	22243205	+	AT4G36290.1	72	0.002	7	tr|A0A1D6J0Q1|A0A1D6J0Q1_MAIZE	77.419	4.7e-06	8	1	B_49
Et_1A_006440	1A	22232140	22243205	+	AT4G36290.1	73.077	0.023	7	tr|A0A1D6J0Q1|A0A1D6J0Q1_MAIZE	48.98	1.86e-17	8	1	B_49
Et_1A_006440	1A	22232140	22243205	+	AT4G36290.1	73.077	0.023	7	tr|A0A1D6J0Q1|A0A1D6J0Q1_MAIZE	85.714	1.63e-21	8	1	B_49
Et_1A_006440	1A	22232140	22243205	+	AT4G36290.1	66.667	4.94e-09	7	tr|A0A1D6J0Q1|A0A1D6J0Q1_MAIZE	85.714	1.63e-21	8	1	B_49
Et_1A_006440	1A	22232140	22243205	+	AT4G36290.1	73.077	0.023	7	tr|A0A1D6J0Q1|A0A1D6J0Q1_MAIZE	82.609	2.85e-05	8	1	B_49
Et_1A_006440	1A	22232140	22243205	+	AT4G36290.1	42.857	1.12e-13	7	tr|A0A1D6J0Q1|A0A1D6J0Q1_MAIZE	82.609	2.85e-05	8	1	B_49
Et_1A_006440	1A	22232140	22243205	+	AT4G36290.1	72	0.002	7	tr|A0A1D6J0Q1|A0A1D6J0Q1_MAIZE	48.98	1.86e-17	8	1	B_49
Et_1A_006440	1A	22232140	22243205	+	AT4G36290.1	66.667	4.94e-09	7	tr|A0A1D6J0Q1|A0A1D6J0Q1_MAIZE	71.429	7.11e-07	8	1	B_49
Et_1A_006440	1A	22232140	22243205	+	AT4G36290.1	73.077	0.023	7	tr|A0A1D6J0Q1|A0A1D6J0Q1_MAIZE	50	1.29e-08	8	1	B_49
Et_1A_006440	1A	22232140	22243205	+	AT4G36290.1	45.455	6.08e-08	7	tr|A0A1D6J0Q1|A0A1D6J0Q1_MAIZE	85.714	1.63e-21	8	1	B_49
Et_1A_006440	1A	22232140	22243205	+	AT4G36290.1	42.857	1.12e-13	7	tr|A0A1D6J0Q1|A0A1D6J0Q1_MAIZE	71.429	7.11e-07	8	1	B_49
Et_1A_006440	1A	22232140	22243205	+	AT4G36290.1	45.455	6.08e-08	7	tr|A0A1D6J0Q1|A0A1D6J0Q1_MAIZE	50	1.29e-08	8	1	B_49
Et_1A_006440	1A	22232140	22243205	+	AT4G36290.1	45.455	6.08e-08	7	tr|A0A1D6J0Q1|A0A1D6J0Q1_MAIZE	77.419	4.7e-06	8	1	B_49
Et_1A_006440	1A	22232140	22243205	+	AT4G36290.1	73.077	0.023	7	tr|A0A1D6J0Q1|A0A1D6J0Q1_MAIZE	71.429	7.11e-07	8	1	B_49
Et_1A_006440	1A	22232140	22243205	+	AT4G36290.1	45.455	6.08e-08	7	tr|A0A1D6J0Q1|A0A1D6J0Q1_MAIZE	82.609	2.85e-05	8	1	B_49
Et_1A_006440	1A	22232140	22243205	+	AT4G36290.1	42.857	1.12e-13	7	tr|A0A1D6J0Q1|A0A1D6J0Q1_MAIZE	50	1.29e-08	8	1	B_49
Et_1A_006440	1A	22232140	22243205	+	AT4G36290.1	42.857	1.12e-13	7	tr|A0A1D6J0Q1|A0A1D6J0Q1_MAIZE	48.98	1.86e-17	8	1	B_49
Et_1A_006443	1A	22244927	22246806	-	NA	NA	NA	NA	NA	NA	NA	NA	1	B_49
Et_1A_006447	1A	22297298	22298602	-	NA	NA	NA	NA	NA	NA	NA	NA	1	B_49
Et_1A_005031	1A	22307578	22308621	+	AT1G79280.1	33.929	1	16	NA	NA	NA	NA	1	B_49
Et_1A_006444	1A	22314298	22333984	+	AT4G34830.1	47.561	1.39e-11	8	tr|A0A1D6KCE6|A0A1D6KCE6_MAIZE	80.556	1.71e-08	9	1	B_49
Et_1A_006444	1A	22314298	22333984	+	AT4G34830.1	47.561	1.39e-11	8	tr|A0A1D6KCE6|A0A1D6KCE6_MAIZE	67.619	1.06e-33	9	1	B_49
Et_1A_006444	1A	22314298	22333984	+	AT4G34830.1	50.649	8.55e-16	8	tr|A0A1D6KCE6|A0A1D6KCE6_MAIZE	87.879	3.17e-09	9	1	B_49
Et_1A_006444	1A	22314298	22333984	+	AT4G34830.1	50	0.011	8	tr|A0A1D6KCE6|A0A1D6KCE6_MAIZE	80.556	1.71e-08	9	1	B_49
Et_1A_006444	1A	22314298	22333984	+	AT4G34830.1	50.649	8.55e-16	8	tr|A0A1D6KCE6|A0A1D6KCE6_MAIZE	83.117	6.89e-32	9	1	B_49
Et_1A_006444	1A	22314298	22333984	+	AT4G34830.1	47.561	1.39e-11	8	tr|A0A1D6KCE6|A0A1D6KCE6_MAIZE	77.419	5.58e-07	9	1	B_49
Et_1A_006444	1A	22314298	22333984	+	AT4G34830.1	50.649	8.55e-16	8	tr|A0A1D6KCE6|A0A1D6KCE6_MAIZE	77.419	5.58e-07	9	1	B_49
Et_1A_006444	1A	22314298	22333984	+	AT4G34830.1	50.649	8.55e-16	8	tr|A0A1D6KCE6|A0A1D6KCE6_MAIZE	23.577	7.9	9	1	B_49
Et_1A_006444	1A	22314298	22333984	+	AT4G34830.1	50	0.011	8	tr|A0A1D6KCE6|A0A1D6KCE6_MAIZE	58.824	8.31e-98	9	1	B_49
Et_1A_006444	1A	22314298	22333984	+	AT4G34830.1	50	0.011	8	tr|A0A1D6KCE6|A0A1D6KCE6_MAIZE	67.619	1.06e-33	9	1	B_49
Et_1A_006444	1A	22314298	22333984	+	AT4G34830.1	50	0.011	8	tr|A0A1D6KCE6|A0A1D6KCE6_MAIZE	77.419	5.58e-07	9	1	B_49
Et_1A_006444	1A	22314298	22333984	+	AT4G34830.1	47.561	1.39e-11	8	tr|A0A1D6KCE6|A0A1D6KCE6_MAIZE	83.117	6.89e-32	9	1	B_49
Et_1A_006444	1A	22314298	22333984	+	AT4G34830.1	47.561	1.39e-11	8	tr|A0A1D6KCE6|A0A1D6KCE6_MAIZE	58.824	8.31e-98	9	1	B_49
Et_1A_006444	1A	22314298	22333984	+	AT4G34830.1	50	0.011	8	tr|A0A1D6KCE6|A0A1D6KCE6_MAIZE	87.879	3.17e-09	9	1	B_49
Et_1A_006444	1A	22314298	22333984	+	AT4G34830.1	50.649	8.55e-16	8	tr|A0A1D6KCE6|A0A1D6KCE6_MAIZE	67.619	1.06e-33	9	1	B_49
Et_1A_006444	1A	22314298	22333984	+	AT4G34830.1	47.561	1.39e-11	8	tr|A0A1D6KCE6|A0A1D6KCE6_MAIZE	87.879	3.17e-09	9	1	B_49
Et_1A_006444	1A	22314298	22333984	+	AT4G34830.1	47.561	1.39e-11	8	tr|A0A1D6KCE6|A0A1D6KCE6_MAIZE	23.577	7.9	9	1	B_49
Et_1A_006444	1A	22314298	22333984	+	AT4G34830.1	44.409	9.55e-64	8	tr|A0A1D6KCE6|A0A1D6KCE6_MAIZE	23.636	0.1	9	1	B_49
Et_1A_006444	1A	22314298	22333984	+	AT4G34830.1	44.409	9.55e-64	8	tr|A0A1D6KCE6|A0A1D6KCE6_MAIZE	23.577	7.9	9	1	B_49
Et_1A_006444	1A	22314298	22333984	+	AT4G34830.1	44.409	9.55e-64	8	tr|A0A1D6KCE6|A0A1D6KCE6_MAIZE	58.824	8.31e-98	9	1	B_49
Et_1A_006444	1A	22314298	22333984	+	AT4G34830.1	44.409	9.55e-64	8	tr|A0A1D6KCE6|A0A1D6KCE6_MAIZE	67.619	1.06e-33	9	1	B_49
Et_1A_006444	1A	22314298	22333984	+	AT4G34830.1	44.409	9.55e-64	8	tr|A0A1D6KCE6|A0A1D6KCE6_MAIZE	83.117	6.89e-32	9	1	B_49
Et_1A_006444	1A	22314298	22333984	+	AT4G34830.1	44.409	9.55e-64	8	tr|A0A1D6KCE6|A0A1D6KCE6_MAIZE	77.419	5.58e-07	9	1	B_49
Et_1A_006444	1A	22314298	22333984	+	AT4G34830.1	50	0.011	8	tr|A0A1D6KCE6|A0A1D6KCE6_MAIZE	23.577	7.9	9	1	B_49
Et_1A_006444	1A	22314298	22333984	+	AT4G34830.1	50	0.011	8	tr|A0A1D6KCE6|A0A1D6KCE6_MAIZE	83.117	6.89e-32	9	1	B_49
Et_1A_006444	1A	22314298	22333984	+	AT4G34830.1	50.649	8.55e-16	8	tr|A0A1D6KCE6|A0A1D6KCE6_MAIZE	80.556	1.71e-08	9	1	B_49
Et_1A_006444	1A	22314298	22333984	+	AT4G34830.1	50	0.011	8	tr|A0A1D6KCE6|A0A1D6KCE6_MAIZE	23.636	0.1	9	1	B_49
Et_1A_006444	1A	22314298	22333984	+	AT4G34830.1	47.561	1.39e-11	8	tr|A0A1D6KCE6|A0A1D6KCE6_MAIZE	23.636	0.1	9	1	B_49
Et_1A_006444	1A	22314298	22333984	+	AT4G34830.1	44.409	9.55e-64	8	tr|A0A1D6KCE6|A0A1D6KCE6_MAIZE	87.879	3.17e-09	9	1	B_49
Et_1A_006444	1A	22314298	22333984	+	AT4G34830.1	50.649	8.55e-16	8	tr|A0A1D6KCE6|A0A1D6KCE6_MAIZE	23.636	0.1	9	1	B_49
Et_1A_006444	1A	22314298	22333984	+	AT4G34830.1	44.409	9.55e-64	8	tr|A0A1D6KCE6|A0A1D6KCE6_MAIZE	80.556	1.71e-08	9	1	B_49
Et_1A_006444	1A	22314298	22333984	+	AT4G34830.1	50.649	8.55e-16	8	tr|A0A1D6KCE6|A0A1D6KCE6_MAIZE	58.824	8.31e-98	9	1	B_49
Et_1A_006445	1A	22338193	22339827	+	AT2G19290.1	30.769	1.6	8	tr|A0A1D6F7H8|A0A1D6F7H8_MAIZE	58.571	3.31e-47	39	1	B_49
Et_1A_005029	1A	22342041	22342649	-	AT2G20510.2	29.333	1.1	36	tr|A0A1D6DQM5|A0A1D6DQM5_MAIZE	41.176	1.6	25	1	B_49
Et_1A_005030	1A	22353730	22353813	-	NA	NA	NA	NA	NA	NA	NA	NA	1	B_49
Et_1A_008970	1A	22358022	22358407	+	AT4G35270.4	28.696	0.33	78	tr|A0A1D6I616|A0A1D6I616_MAIZE	23.529	1.3	53	1	B_49
Et_1A_006446	1A	22370476	22374887	+	NA	NA	NA	NA	tr|A0A1D6P2H5|A0A1D6P2H5_MAIZE	40.541	8.7	3	1	B_49
Et_1A_006448	1A	22429668	22429878	+	AT2G18760.3	38.462	1.9	56	tr|A0A1D6QP20|A0A1D6QP20_MAIZE	46.154	0.061	56	1	B_49
Et_1A_006454	1A	22611992	22613394	-	NA	NA	NA	NA	NA	NA	NA	NA	1	B_49
Et_1A_007211	1A	32075160	32103044	+	AT2G23130.1	32.143	0.074	1	tr|C4IYM4|C4IYM4_MAIZE	54.787	2.42e-44	3	3	B_81
Et_1A_007211	1A	32075160	32103044	+	AT2G23130.1	32.143	0.074	1	tr|C4IYM4|C4IYM4_MAIZE	40.909	8.9e-08	3	3	B_81
Et_1A_007212	1A	32103048	32103511	+	NA	NA	NA	NA	tr|A0A1D6GU14|A0A1D6GU14_MAIZE	37.143	9.2	21	3	B_81
Et_1A_007213	1A	32116642	32119337	+	AT1G70180.3	32.955	3.8	9	NA	NA	NA	NA	3	B_81
Et_1A_009184	1A	32119368	32120285	+	NA	NA	NA	NA	NA	NA	NA	NA	3	B_81
Et_1A_007217	1A	32125945	32128529	-	AT4G25730.1	40.476	6.3	5	NA	NA	NA	NA	3	B_81
Et_1A_007214	1A	32139307	32142592	+	AT1G48060.1	37.209	0.001	8	tr|C4IYM4|C4IYM4_MAIZE	46.377	1.03e-17	26	3	B_81
Et_1A_007214	1A	32139307	32142592	+	AT1G48060.1	37.209	0.001	8	tr|C4IYM4|C4IYM4_MAIZE	34.437	3.08e-16	26	3	B_81
Et_1A_007218	1A	32143480	32156344	-	AT1G51010.1	33.333	0.23	1	tr|A0A1D6E9Q8|A0A1D6E9Q8_MAIZE	35.393	5.1e-18	4	3	B_81
Et_1A_009185	1A	32157095	32157610	+	NA	NA	NA	NA	NA	NA	NA	NA	3	B_81
Et_1A_007215	1A	32161624	32162020	+	NA	NA	NA	NA	tr|A0A1D6LHW0|A0A1D6LHW0_MAIZE	40	2.9	34	3	B_81
Et_1A_004701	1A	32175988	32178636	-	AT5G15020.1	31.313	8.8	11	tr|A0A1D6NZN5|A0A1D6NZN5_MAIZE	31.429	0.97	8	3	B_81
Et_1A_007216	1A	32180184	32187201	+	AT5G53350.1	80.645	9.12e-07	7	tr|A0A1D6H4N6|A0A1D6H4N6_MAIZE	76	0.2	12	3	B_81
Et_1A_007216	1A	32180184	32187201	+	AT5G53350.1	80.645	9.12e-07	7	tr|A0A1D6H4N6|A0A1D6H4N6_MAIZE	90.323	2.82e-07	12	3	B_81
Et_1A_007216	1A	32180184	32187201	+	AT5G53350.1	80.645	9.12e-07	7	tr|A0A1D6H4N6|A0A1D6H4N6_MAIZE	75.51	6.35e-13	12	3	B_81
Et_1A_007216	1A	32180184	32187201	+	AT5G53350.1	51.111	0.000171	7	tr|A0A1D6H4N6|A0A1D6H4N6_MAIZE	59.091	4.41e-19	12	3	B_81
Et_1A_007216	1A	32180184	32187201	+	AT5G53350.1	80.645	9.12e-07	7	tr|A0A1D6H4N6|A0A1D6H4N6_MAIZE	57.778	1.96e-05	12	3	B_81
Et_1A_007216	1A	32180184	32187201	+	AT5G53350.1	80.645	9.12e-07	7	tr|A0A1D6H4N6|A0A1D6H4N6_MAIZE	59.091	4.41e-19	12	3	B_81
Et_1A_007216	1A	32180184	32187201	+	AT5G53350.1	80.645	9.12e-07	7	tr|A0A1D6H4N6|A0A1D6H4N6_MAIZE	92.857	3.73e-15	12	3	B_81
Et_1A_007216	1A	32180184	32187201	+	AT5G53350.1	80.556	3.05e-10	7	tr|A0A1D6H4N6|A0A1D6H4N6_MAIZE	57.778	1.96e-05	12	3	B_81
Et_1A_007216	1A	32180184	32187201	+	AT5G53350.1	80.556	3.05e-10	7	tr|A0A1D6H4N6|A0A1D6H4N6_MAIZE	76	0.2	12	3	B_81
Et_1A_007216	1A	32180184	32187201	+	AT5G53350.1	73.81	6.07e-12	7	tr|A0A1D6H4N6|A0A1D6H4N6_MAIZE	59.091	4.41e-19	12	3	B_81
Et_1A_007216	1A	32180184	32187201	+	AT5G53350.1	73.81	6.07e-12	7	tr|A0A1D6H4N6|A0A1D6H4N6_MAIZE	57.778	1.96e-05	12	3	B_81
Et_1A_007216	1A	32180184	32187201	+	AT5G53350.1	73.81	6.07e-12	7	tr|A0A1D6H4N6|A0A1D6H4N6_MAIZE	76	0.2	12	3	B_81
Et_1A_007216	1A	32180184	32187201	+	AT5G53350.1	51.111	0.000171	7	tr|A0A1D6H4N6|A0A1D6H4N6_MAIZE	92.857	3.73e-15	12	3	B_81
Et_1A_007216	1A	32180184	32187201	+	AT5G53350.1	51.111	0.000171	7	tr|A0A1D6H4N6|A0A1D6H4N6_MAIZE	76	0.2	12	3	B_81
Et_1A_007216	1A	32180184	32187201	+	AT5G53350.1	80.556	3.05e-10	7	tr|A0A1D6H4N6|A0A1D6H4N6_MAIZE	90.323	2.82e-07	12	3	B_81
Et_1A_007216	1A	32180184	32187201	+	AT5G53350.1	80.556	3.05e-10	7	tr|A0A1D6H4N6|A0A1D6H4N6_MAIZE	75.51	6.35e-13	12	3	B_81
Et_1A_007216	1A	32180184	32187201	+	AT5G53350.1	73.81	6.07e-12	7	tr|A0A1D6H4N6|A0A1D6H4N6_MAIZE	75.51	6.35e-13	12	3	B_81
Et_1A_007216	1A	32180184	32187201	+	AT5G53350.1	73.81	6.07e-12	7	tr|A0A1D6H4N6|A0A1D6H4N6_MAIZE	90.323	2.82e-07	12	3	B_81
Et_1A_007216	1A	32180184	32187201	+	AT5G53350.1	51.111	0.000171	7	tr|A0A1D6H4N6|A0A1D6H4N6_MAIZE	75.51	6.35e-13	12	3	B_81
Et_1A_007216	1A	32180184	32187201	+	AT5G53350.1	51.111	0.000171	7	tr|A0A1D6H4N6|A0A1D6H4N6_MAIZE	90.323	2.82e-07	12	3	B_81
Et_1A_007216	1A	32180184	32187201	+	AT5G53350.1	51.111	0.000171	7	tr|A0A1D6H4N6|A0A1D6H4N6_MAIZE	57.778	1.96e-05	12	3	B_81
Et_1A_007216	1A	32180184	32187201	+	AT5G53350.1	73.81	6.07e-12	7	tr|A0A1D6H4N6|A0A1D6H4N6_MAIZE	92.857	3.73e-15	12	3	B_81
Et_1A_007216	1A	32180184	32187201	+	AT5G53350.1	80.556	3.05e-10	7	tr|A0A1D6H4N6|A0A1D6H4N6_MAIZE	59.091	4.41e-19	12	3	B_81
Et_1A_007216	1A	32180184	32187201	+	AT5G53350.1	80.556	3.05e-10	7	tr|A0A1D6H4N6|A0A1D6H4N6_MAIZE	92.857	3.73e-15	12	3	B_81
Et_1A_007219	1A	32188540	32194280	+	AT3G08670.1	36.364	0.092	3	tr|A0A1D6EAD0|A0A1D6EAD0_MAIZE	37.634	3.67e-05	4	3	B_81
Et_1A_009186	1A	32194592	32195770	-	AT4G17140.3	29.268	5.6	10	NA	NA	NA	NA	3	B_81
Et_1A_005199	1A	32198086	32198434	+	AT1G28630.4	33.929	0.45	47	tr|A0A1D6J702|A0A1D6J702_MAIZE	34.247	2.4	63	3	B_81
Et_1A_004702	1A	32232567	32233061	-	NA	NA	NA	NA	tr|A0A1D6JL61|A0A1D6JL61_MAIZE	27.273	2.3	43	3	B_81
Et_1A_007220	1A	32246119	32247563	+	AT4G10950.2	40.909	0.69	9	NA	NA	NA	NA	3	B_81
Et_1A_007224	1A	32255407	32272300	-	AT4G09980.2	28.261	0.098	3	tr|A0A1D6HJU1|A0A1D6HJU1_MAIZE	52.273	0.001	1	3	B_81
Et_1A_007221	1A	32258787	32260202	+	AT4G18970.1	28.824	2.87e-11	34	tr|B4FHS3|B4FHS3_MAIZE	40	1.24e-20	35	3	B_81
Et_1A_007222	1A	32276750	32278911	+	AT1G80170.2	50.649	2.27e-21	11	tr|B4FZT4|B4FZT4_MAIZE	83.333	1.34e-35	11	3	B_81
Et_1A_007223	1A	32280657	32283464	+	NA	NA	NA	NA	tr|A0A1D6ECF9|A0A1D6ECF9_MAIZE	51.282	0.034	4	3	B_81
Et_1A_007225	1A	32301871	32305324	+	AT5G24270.3	69.444	1.14e-10	3	tr|A0A1D6QNN9|A0A1D6QNN9_MAIZE	78.378	2.25e-13	14	3	B_81
Et_1A_007225	1A	32301871	32305324	+	AT5G24270.3	69.444	1.14e-10	3	tr|A0A1D6QNN9|A0A1D6QNN9_MAIZE	44.628	6.19e-16	14	3	B_81
Et_1A_007226	1A	32322142	32324157	+	AT5G24270.3	66.667	1.57e-10	8	tr|A0A1D6QNN9|A0A1D6QNN9_MAIZE	80.952	0.005	21	3	B_81
Et_1A_007226	1A	32322142	32324157	+	AT5G24270.3	66.667	1.57e-10	8	tr|A0A1D6QNN9|A0A1D6QNN9_MAIZE	89.744	2.83e-17	21	3	B_81
Et_1A_007226	1A	32322142	32324157	+	AT5G24270.3	83.333	0.032	8	tr|A0A1D6QNN9|A0A1D6QNN9_MAIZE	50.588	8.75e-14	21	3	B_81
Et_1A_007226	1A	32322142	32324157	+	AT5G24270.3	83.333	0.032	8	tr|A0A1D6QNN9|A0A1D6QNN9_MAIZE	80.952	0.005	21	3	B_81
Et_1A_007226	1A	32322142	32324157	+	AT5G24270.3	66.667	1.57e-10	8	tr|A0A1D6QNN9|A0A1D6QNN9_MAIZE	50.588	8.75e-14	21	3	B_81
Et_1A_007226	1A	32322142	32324157	+	AT5G24270.3	83.333	0.032	8	tr|A0A1D6QNN9|A0A1D6QNN9_MAIZE	89.744	2.83e-17	21	3	B_81
Et_1A_007227	1A	32334128	32336097	+	AT5G24270.3	81.818	3.69e-05	3	tr|A0A1D6QNN9|A0A1D6QNN9_MAIZE	81.818	0.00018	3	3	B_81
Et_1A_009187	1A	32334292	32339631	-	AT5G24270.3	69.231	1.19e-10	5	tr|A0A1D6QNN9|A0A1D6QNN9_MAIZE	82.143	5.35e-06	5	3	B_81
Et_1A_009187	1A	32334292	32339631	-	AT5G24270.3	77.778	0.2	5	tr|A0A1D6QNN9|A0A1D6QNN9_MAIZE	82.143	5.35e-06	5	3	B_81
Et_1A_009187	1A	32334292	32339631	-	AT5G24270.3	57.143	0.035	5	tr|A0A1D6QNN9|A0A1D6QNN9_MAIZE	89.744	1.92e-16	5	3	B_81
Et_1A_009187	1A	32334292	32339631	-	AT5G24270.3	77.778	0.2	5	tr|A0A1D6QNN9|A0A1D6QNN9_MAIZE	89.744	1.92e-16	5	3	B_81
Et_1A_009187	1A	32334292	32339631	-	AT5G24270.3	69.231	1.19e-10	5	tr|A0A1D6QNN9|A0A1D6QNN9_MAIZE	89.744	1.92e-16	5	3	B_81
Et_1A_009187	1A	32334292	32339631	-	AT5G24270.3	77.778	0.2	5	tr|A0A1D6QNN9|A0A1D6QNN9_MAIZE	76.19	0.037	5	3	B_81
Et_1A_009187	1A	32334292	32339631	-	AT5G24270.3	57.143	0.035	5	tr|A0A1D6QNN9|A0A1D6QNN9_MAIZE	76.19	0.037	5	3	B_81
Et_1A_009187	1A	32334292	32339631	-	AT5G24270.3	69.231	1.19e-10	5	tr|A0A1D6QNN9|A0A1D6QNN9_MAIZE	76.19	0.037	5	3	B_81
Et_1A_009187	1A	32334292	32339631	-	AT5G24270.3	57.143	0.035	5	tr|A0A1D6QNN9|A0A1D6QNN9_MAIZE	82.143	5.35e-06	5	3	B_81
Et_1A_007228	1A	32342299	32348107	+	AT5G24260.4	68.449	5.07e-83	10	tr|A0A1D6H4R4|A0A1D6H4R4_MAIZE	88.649	7.56e-108	10	3	B_81
Et_1A_007229	1A	32350942	32356663	+	AT5G24240.2	51.163	2.95e-88	14	tr|C4J0H5|C4J0H5_MAIZE	64.211	2.95e-113	14	3	B_81
Et_1A_007233	1A	32353958	32357262	-	NA	NA	NA	NA	NA	NA	NA	NA	3	B_81
Et_1A_007230	1A	32357944	32358916	+	NA	NA	NA	NA	NA	NA	NA	NA	3	B_81
Et_1A_007231	1A	32360775	32365459	+	AT1G04140.1	44.118	1.9	30	tr|A0A1D6EEH4|A0A1D6EEH4_MAIZE	58.114	6.94e-153	28	3	B_81
Et_1A_007231	1A	32360775	32365459	+	AT1G04140.1	33.333	1.21e-35	30	tr|A0A1D6EEH4|A0A1D6EEH4_MAIZE	58.114	6.94e-153	28	3	B_81
Et_1A_007232	1A	32372875	32374901	+	AT3G52560.4	76.923	8.16e-29	9	tr|B7ZZQ0|B7ZZQ0_MAIZE	88.525	5.55e-30	9	3	B_81
Et_1A_009188	1A	32377322	32378209	-	AT3G13380.1	43.902	1.2	14	tr|A0A1D6N311|A0A1D6N311_MAIZE	29.897	1.2	30	3	B_81
Et_1A_007234	1A	32380024	32389384	-	AT3G54200.1	35.897	3.8	1	NA	NA	NA	NA	3	B_81
Et_1A_007235	1A	32392208	32392915	+	NA	NA	NA	NA	NA	NA	NA	NA	3	B_81
Et_1A_007239	1A	32393370	32403322	-	AT3G24255.5	31.868	0.000365	3	tr|A0A1D6FB22|A0A1D6FB22_MAIZE	42.623	3.17e-08	2	3	B_81
Et_1A_009189	1A	32422177	32424314	+	NA	NA	NA	NA	NA	NA	NA	NA	3	B_81
Et_1A_007236	1A	32424523	32431491	+	NA	NA	NA	NA	tr|A0A1D6Q283|A0A1D6Q283_MAIZE	47.059	3.1	1	3	B_81
Et_1A_007240	1A	32425667	32431455	-	NA	NA	NA	NA	tr|A0A1D6KSC0|A0A1D6KSC0_MAIZE	64.706	1.3	1	3	B_81
Et_1A_007237	1A	32432794	32456526	+	AT4G23160.3	41.743	4.96e-46	3	tr|A0A1D6N226|A0A1D6N226_MAIZE	64.979	1.19e-95	3	3	B_81
Et_1A_004703	1A	32453647	32456929	-	NA	NA	NA	NA	NA	NA	NA	NA	3	B_81
Et_1A_005200	1A	32463850	32464917	+	NA	NA	NA	NA	NA	NA	NA	NA	3	B_81
Et_1A_007241	1A	32466183	32468666	-	NA	NA	NA	NA	NA	NA	NA	NA	3	B_81
Et_1A_007238	1A	32471013	32474667	+	AT2G17750.1	31.25	0.77	5	tr|Q84JV5|Q84JV5_MAIZE	46.809	1.71e-17	13	3	B_81
Et_1A_007238	1A	32471013	32474667	+	AT2G17750.1	31.25	0.77	5	tr|Q84JV5|Q84JV5_MAIZE	39.344	0.074	13	3	B_81
Et_1A_007244	1A	32485184	32511171	-	AT3G24255.5	24.646	9.44e-27	5	tr|A0A1D6H8W9|A0A1D6H8W9_MAIZE	29.33	5.28e-44	5	3	B_81
Et_1A_004704	1A	32512139	32513116	-	AT4G37800.1	29.63	1.1	16	NA	NA	NA	NA	3	B_81
Et_1A_007245	1A	32522675	32529960	-	AT3G56790.1	25.532	1.3	3	tr|A0A1D6GJ76|A0A1D6GJ76_MAIZE	40	0.16	2	3	B_81
Et_1A_007242	1A	32535099	32542110	+	AT2G28240.2	23.643	0.000452	10	tr|A0A1D6FB22|A0A1D6FB22_MAIZE	49.231	7.88e-11	3	3	B_81
Et_1A_007243	1A	32554523	32562407	+	AT5G13650.1	64.634	3.56e-53	15	tr|G3K3T1|G3K3T1_MAIZE	93.023	2.81e-17	15	3	B_81
Et_1A_007243	1A	32554523	32562407	+	AT5G13650.1	80.952	3.95e-14	15	tr|G3K3T1|G3K3T1_MAIZE	93.023	2.81e-17	15	3	B_81
Et_1A_007243	1A	32554523	32562407	+	AT5G13650.1	66.981	4.12e-34	15	tr|G3K3T1|G3K3T1_MAIZE	73.585	3.99e-38	15	3	B_81
Et_1A_007243	1A	32554523	32562407	+	AT5G13650.1	80.952	3.95e-14	15	tr|G3K3T1|G3K3T1_MAIZE	73.585	3.99e-38	15	3	B_81
Et_1A_007243	1A	32554523	32562407	+	AT5G13650.1	72.727	3.48e-07	15	tr|G3K3T1|G3K3T1_MAIZE	73.585	3.99e-38	15	3	B_81
Et_1A_007243	1A	32554523	32562407	+	AT5G13650.1	80.952	3.95e-14	15	tr|G3K3T1|G3K3T1_MAIZE	73.214	8.03e-16	15	3	B_81
Et_1A_007243	1A	32554523	32562407	+	AT5G13650.1	80.952	3.95e-14	15	tr|G3K3T1|G3K3T1_MAIZE	61.111	2.82e-11	15	3	B_81
Et_1A_007243	1A	32554523	32562407	+	AT5G13650.1	66.981	4.12e-34	15	tr|G3K3T1|G3K3T1_MAIZE	73.214	8.03e-16	15	3	B_81
Et_1A_007243	1A	32554523	32562407	+	AT5G13650.1	64.634	3.56e-53	15	tr|G3K3T1|G3K3T1_MAIZE	75.862	2.59e-59	15	3	B_81
Et_1A_007243	1A	32554523	32562407	+	AT5G13650.1	64.634	3.56e-53	15	tr|G3K3T1|G3K3T1_MAIZE	73.214	8.03e-16	15	3	B_81
Et_1A_007243	1A	32554523	32562407	+	AT5G13650.1	72.727	3.48e-07	15	tr|G3K3T1|G3K3T1_MAIZE	61.111	2.82e-11	15	3	B_81
Et_1A_007243	1A	32554523	32562407	+	AT5G13650.1	80.952	3.95e-14	15	tr|G3K3T1|G3K3T1_MAIZE	75.862	2.59e-59	15	3	B_81
Et_1A_007243	1A	32554523	32562407	+	AT5G13650.1	66.981	4.12e-34	15	tr|G3K3T1|G3K3T1_MAIZE	93.023	2.81e-17	15	3	B_81
Et_1A_007243	1A	32554523	32562407	+	AT5G13650.1	66.981	4.12e-34	15	tr|G3K3T1|G3K3T1_MAIZE	75.862	2.59e-59	15	3	B_81
Et_1A_007243	1A	32554523	32562407	+	AT5G13650.1	66.981	4.12e-34	15	tr|G3K3T1|G3K3T1_MAIZE	61.111	2.82e-11	15	3	B_81
Et_1A_007243	1A	32554523	32562407	+	AT5G13650.1	72.727	3.48e-07	15	tr|G3K3T1|G3K3T1_MAIZE	73.214	8.03e-16	15	3	B_81
Et_1A_007243	1A	32554523	32562407	+	AT5G13650.1	64.912	1.72e-13	15	tr|G3K3T1|G3K3T1_MAIZE	75.862	2.59e-59	15	3	B_81
Et_1A_007243	1A	32554523	32562407	+	AT5G13650.1	64.634	3.56e-53	15	tr|G3K3T1|G3K3T1_MAIZE	61.111	2.82e-11	15	3	B_81
Et_1A_007243	1A	32554523	32562407	+	AT5G13650.1	64.912	1.72e-13	15	tr|G3K3T1|G3K3T1_MAIZE	93.023	2.81e-17	15	3	B_81
Et_1A_007243	1A	32554523	32562407	+	AT5G13650.1	64.912	1.72e-13	15	tr|G3K3T1|G3K3T1_MAIZE	61.111	2.82e-11	15	3	B_81
[truncated: 2,828 more rows]

## Sheet: Supplemental File 1G
SNP id	Chromosome	Position	Fst	GF R2
[truncated: 12,153 more rows]
